# Supplementary material for: Trifluoromethylarylation of alkenes using anilines
Source: Royal Society of Chemistry journal article supplement (doi:10.1039/d3sc03868h), 2023-01-01

Supporting Information

# Trifluoromethylarylation of alkenes using anilines

**Carlos Corral Suarez**<sup>a,b</sup> and **Ignacio Colomer**<sup>\* a,b</sup>

<sup>a</sup>Instituto de Química Orgánica General (IQOG), CSIC, Juan de la Cierva 3, 28006 Madrid, Spain.

<sup>b</sup>IMDEA Nanociencia, Faraday 9, 28049 Madrid, Spain.

## Table of Contents

|                                                                                                |            |
|------------------------------------------------------------------------------------------------|------------|
| <b>1. General experimental details</b>                                                         | <b>S3</b>  |
| <b>2. Synthesis of starting materials</b>                                                      | <b>S3</b>  |
| <b>3. Optimization details</b>                                                                 | <b>S5</b>  |
| <b>4. General procedure for the trifluoromethylarylation of alkenes using anilines in HFIP</b> | <b>S7</b>  |
| <b>5. Derivatization of trifluoromethyl products</b>                                           | <b>S39</b> |
| <b>6. Selective derivatization of bioactive molecules</b>                                      | <b>S45</b> |
| <b>7. Sequential trifluoromethylarylation and hydroarylation of quinolines</b>                 | <b>S47</b> |
| <b>8. Mechanistic studies</b>                                                                  | <b>S49</b> |
| <b>9. References</b>                                                                           | <b>S69</b> |
| <b>10. X-Ray diffraction analysis</b>                                                          | <b>S70</b> |
| <b>11. NMR spectra</b>                                                                         | <b>S79</b> |

## 1. General experimental details

$^1\text{H}$  NMR,  $^{13}\text{C}$  NMR and  $^{19}\text{F}$  NMR spectra were recorded on a Bruker DPX 400 MHz, VARIAN INOVA-300 MHz or VARIAN SYSTEM-500 MHz spectrometers in  $\text{CDCl}_3$  or  $(\text{CD}_3)_2\text{SO}$  and referenced to residual solvent peaks. Chemical shifts are quoted in ppm (parts per million) to the nearest 0.01 ppm with signal splitting recorded as singlet (s), doublet (d), triplet (t), quartet (q), quintet (quint), multiplet (m) and broad singlet (br s). Coupling constants,  $J$ , are measured in Hz to the nearest 0.1 Hz.  $^1\text{H}$  and  $^{13}\text{C}$  NMR spectra were recorded at room temperature. High resolution mass spectra are given to four decimal places and were registered in a spectrometer GCT Agilent Technologies 6890N using Electronic Impact (EI) techniques at 70 eV, Fast Atom Bombardment and Time-of-Flight (TOF) detector or Agilent 6500 Accurate Mass using electrospray (ESI) and Time-of-Flight (TOF) detector. Melting points (m.p.) were obtained from recrystallized samples using a Lecia VMTG heated-stage microscope and are uncorrected. The solvent systems used for recrystallization are quoted in parentheses. Flash column chromatography was performed using silica gel (60 Å, 0.033-0.070 mm, BDH). TLC analyses were performed on Merck Kieselgel 60 F<sub>254</sub> 0.25 mm precoated silica plates. Reagents obtained from Sigma-Aldrich, Alfa, Fluorochem, Apollo and TCI were used directly as supplied. All anhydrous reactions were carried out in flame dried glassware and under an inert atmosphere of argon. All reactions were stirred with magnetic followers. 3900 Parr Instrument Company hydrogenator was used when required.

## 2. Synthesis of starting materials

### 2.1. Synthesis of *N*-Benzylanilines

*N*-Benzylanilines were obtained following well established reductive amination procedure.

#### General procedure for reductive amination

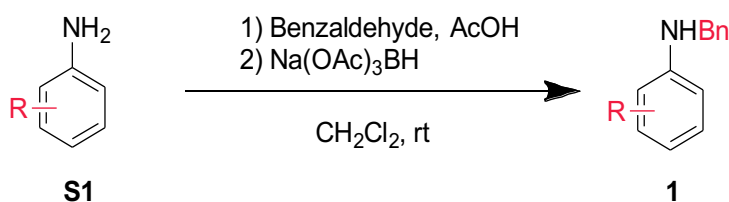

A solution of benzaldehyde (1.0 equiv.), aniline **S1** (1.1 equiv.) and AcOH (0.25 equiv.) in  $\text{CH}_2\text{Cl}_2$  (0.15 M) was stirred for 30 min. at room temperature and sodium triacetoxyborohydride (1.5 equiv.) was added in one portion. The reaction mixture was monitored until completion by TLC and quenched with saturated  $\text{NH}_4\text{Cl}$  aqueous solution. The organic layer was separated and the aqueous layer was extracted with dichloromethane. The combined organic layers were dried over  $\text{Na}_2\text{SO}_4$ , concentrated under reduced pressure and purified by flash column chromatography (EtOAc/Hexane) to afford product **1**.

## 2.2. Synthesis of alkenes

Alkenes **2a**, **2f**, **2u**, **2y** and **2ac** were commercially available and used directly as provided.

### 2.2.1. General procedure for Wittig olefination

Alkenes **2b-t**, **2x** and **2z-ab** were obtained following well established Wittig olefination procedure using the corresponding aldehyde or ketone.

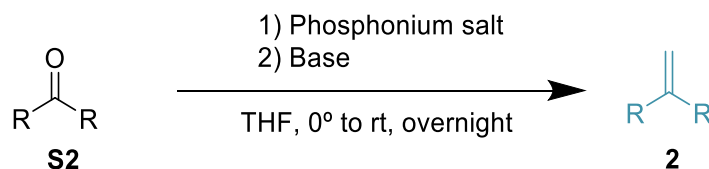

A suspension of triphenylphosphonium salt (1.3 equiv.) in dry THF (5.0mL/mmol) was placed in a flame-dried round-bottom flask. The solution was cooled to 0 °C and kept under argon. The base (1.5 equiv. of *t*-BuOK or 1.8 equiv. of *n*-BuLi) was added in one portion. After stirring at 0 °C for 30 min the solution turns into an intense bright colour, then the aldehyde or ketone **S2** (1.0 equiv.) was added. The reaction mixture was gradually warmed to room temperature. After stirring overnight, the reaction was quenched by slow addition of saturated NH<sub>4</sub>Cl. The phases were separated and the aqueous phase was extracted twice with Et<sub>2</sub>O. The combined organic layers were dried over Na<sub>2</sub>SO<sub>4</sub>. The solvent was evaporated under reduced pressure to give the corresponding alkene **2** that was purified by chromatography on silica gel using the appropriate mixture of eluents.

### 2.2.2. General procedure for ketone reduction and dehydration

Alkenes **2v** and **2w** were obtained following a two-step procedure consisting on ketone reduction and alcohol dehydration.

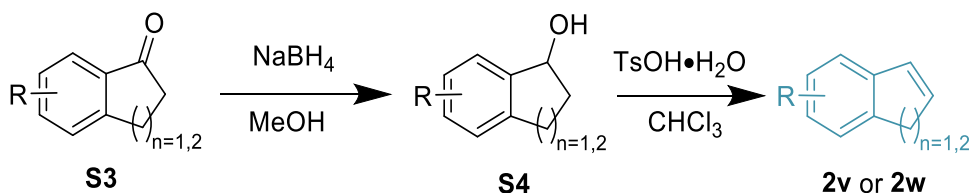

Following an adapted procedure,<sup>1,2</sup> NaBH<sub>4</sub> (5.0 equiv.) was slowly added over a solution of ketone **S3** (1 equiv.) in MeOH at 0 °C. The resulting solution was then allowed to reach room temperature and stirred for 75 min. until complete conversion (monitored by TLC). The solvent was removed under reduced pressure and the resulting solid was dissolved in Et<sub>2</sub>O and successively washed with water and saturated aqueous solution of NH<sub>4</sub>Cl. The organic phase was dried over Na<sub>2</sub>SO<sub>4</sub>, filtered and concentrated under vacuum to afford the desired product **S4**, that was used without further purification. TsOH·H<sub>2</sub>O (0.1 equiv) was added to a solution of alcohol **S4** in CHCl<sub>3</sub> (0.05M) at room temperature under vigorous stirring (important to avoid side reactions). The mixture



was stirred and monitored by TLC until completion. The solvent was evaporated, and the crude reaction was purified by chromatography on silica gel (30% Et<sub>2</sub>O – hexane) to give alkene **2v** or **2w**.

### 2.2.3. Quinoline reduction and N-Boc protection

Dihydroquinoline **9** was obtained via quinoline reduction and in-situ N-Boc protection.

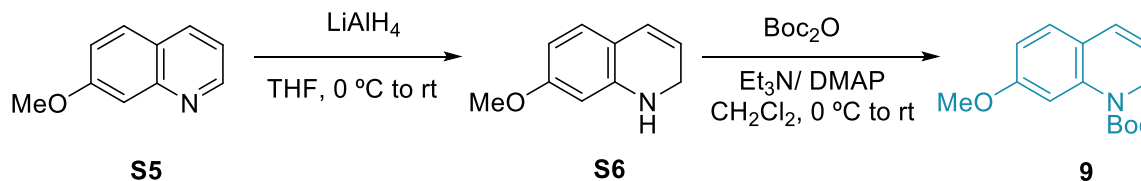

Following an adapted procedure<sup>3</sup>, suspension of lithium aluminum hydride (2 equiv.) in dry THF (2 mL) was added slowly over an ice-cold solution of quinoline (1.0 equiv.) in dry THF (4 mL). The solution was stirred for 2h at 0 °C, then lithium aluminum hydride (2 equiv.) in dry THF (2 mL) was again added and the reaction mixture stirred for 2h at 0 °C. The reaction was then carefully quenched with water and filtered. The filtrate was extracted using ethyl acetate, washed successively with brine, dried over anhydrous Na<sub>2</sub>SO<sub>4</sub>, and concentrated under reduced pressure. The resulting crude was immediately protected. The crude was dissolved in dry DCM (0.2 M), and Boc anhydride (1.5 equiv.), triethylamine (3 equiv.) and 4-(Dimethylamino)pyridine (0.10 equiv.) were added to the solution at 0 °C. The reaction mixture was stirred at room temperature and monitored by TLC until completion. Reaction mixture was diluted with DCM and extracted with water, dried over anhydrous Na<sub>2</sub>SO<sub>4</sub> and concentrated under reduced pressure. The crude was purified by silica gel chromatography (50% EtOAc – hexane) to give **9**.

## 3. Optimization details

### 3.1. Table S1. Effect of the solvent

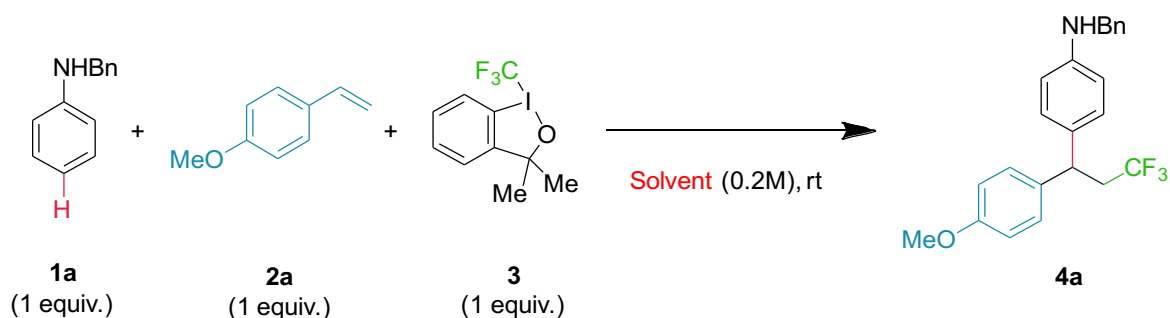

| Entry | Solvent                                    | Isolated yield, <b>4a</b> (%) |
|-------|--------------------------------------------|-------------------------------|
| 1     | HFIP                                       | 58%                           |
| 2     | TFE                                        | 11%                           |
| 3     | CH <sub>2</sub> Cl <sub>2</sub>            | nc                            |
| 4     | TFA                                        | nr                            |
| 5     | AcOH                                       | nr <sup>a</sup>               |
| 6     | Acetonitrile                               | nc                            |
| 7     | HFIP:CH <sub>2</sub> Cl <sub>2</sub> (1:1) | 53%                           |

<sup>a</sup>OAc incorporation, instead of aniline, was observed (36% yield). nr: no reaction. nc: no conversion.

### 3.2. Table S2. Effect of temperature

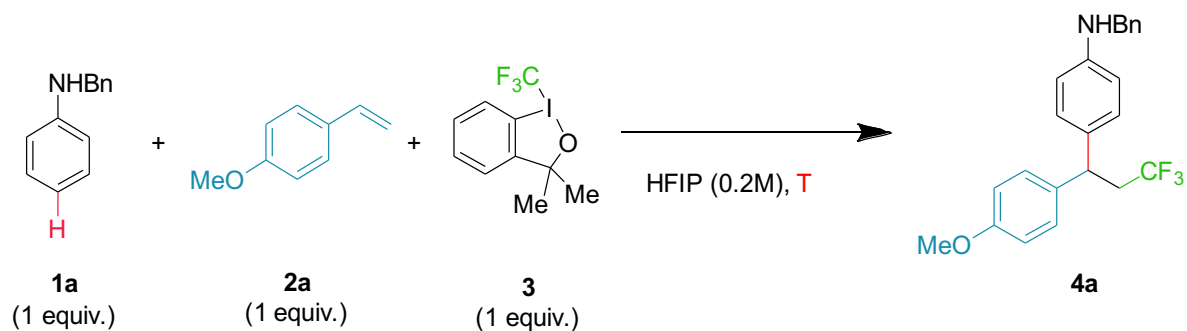

| Entry | Temperature (°C) | Isolated Yield, 4a (%) |
|-------|------------------|------------------------|
| 1     | 80               | 53%                    |
| 2     | 40               | 67%                    |
| 3     | rt               | 58%                    |

### 3.3. Table S3. Effect of the concentration

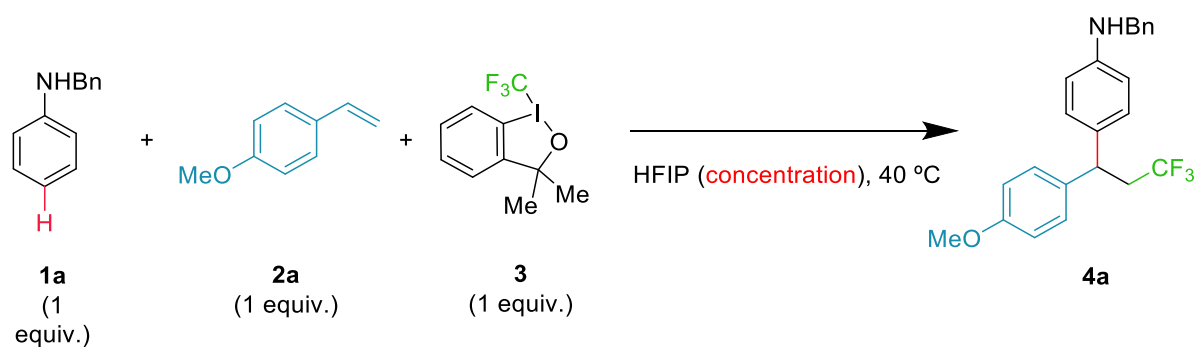

| Entry | Concentration (M) | Isolated Yield, 4a (%) |
|-------|-------------------|------------------------|
| 1     | 0.4M              | 72%                    |
| 2     | 0.2M              | 67%                    |
| 3     | 0.1M              | 49%                    |

### 3.4. Table S4. Effect of stoichiometry in the reaction

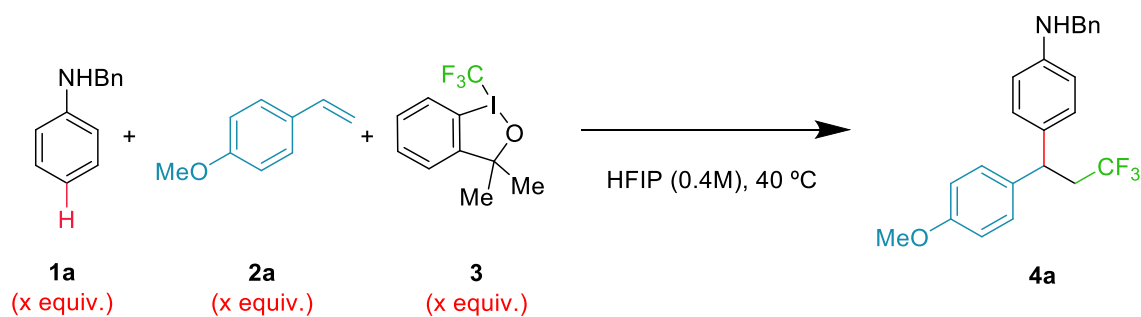

| Entry | 1a (equiv.) | 2a (equiv.) | 3 (equiv.) | Isolated Yield, 4a (%) |
|-------|-------------|-------------|------------|------------------------|
| 1     | 1           | 1           | 1          | 72%                    |
| 2     | 2           | 1           | 1          | 65%                    |
| 3     | 1           | 2           | 1          | 63%                    |
| 4     | 1           | 1           | 2          | 22%                    |

### 3.5. Table S5. Effect of additives and trifluoromethyl reagents

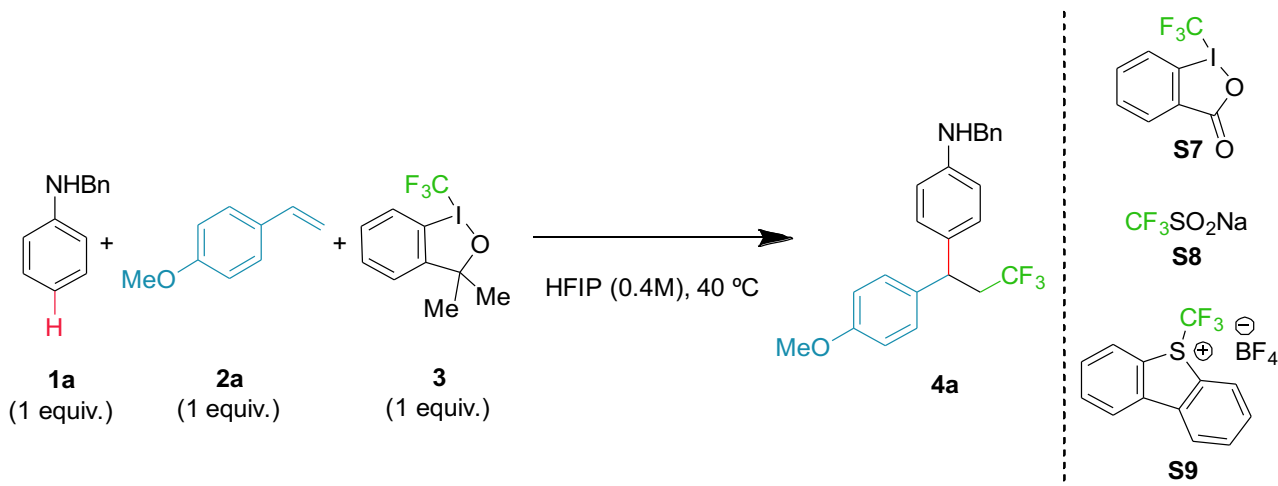

| Entry | Deviations from optimized conditions                       | Isolated Yield, <b>4a</b> (%) |
|-------|------------------------------------------------------------|-------------------------------|
| 1     | none                                                       | 72%                           |
| 2     | Addition of 5.0 equiv. of anisole                          | 70%                           |
| 3     | <b>S7</b> instead of <b>3</b>                              | 34%                           |
| 4     | <b>S8</b> , PIDA and rt                                    | nr                            |
| 5     | <b>S9</b> instead of <b>3</b>                              | nr                            |
| 6     | Addition of 0.1 equiv. of triflic acid                     | 46%                           |
| 7     | Addition of 0.1 equiv. of $\text{BF}_3 \cdot \text{OEt}_2$ | 37%                           |

PIDA: (Diacetoxyiodo)benzene. nr: no reaction

### 4. General procedure for the trifluoromethylation of alkenes using anilines in HFIP.

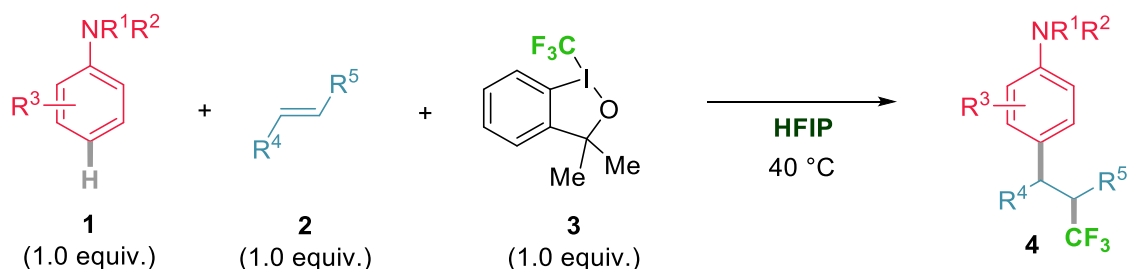

Aniline **1** (1 equiv.) and alkene **2** (1 equiv.) were placed in an oven-dry 10 mL vial and hexafluoroisopropanol (0.4 M) was added, followed by trifluoromethyl reagent **3** (1 equiv.). The vial was sealed, purged with Argon and set in a preheated heating block overnight at 40 °C, unless other temperature is stated. The reaction mixture was cooled down, the solvent was evaporated under reduced pressure and the crude was purified by chromatography on silica gel using the appropriate mixture of eluents to give the corresponding product, **4**.

### *N*-Benzyl-4-[3,3,3-trifluoro-1-(4-methoxyphenyl)propyl]aniline, **4a**.

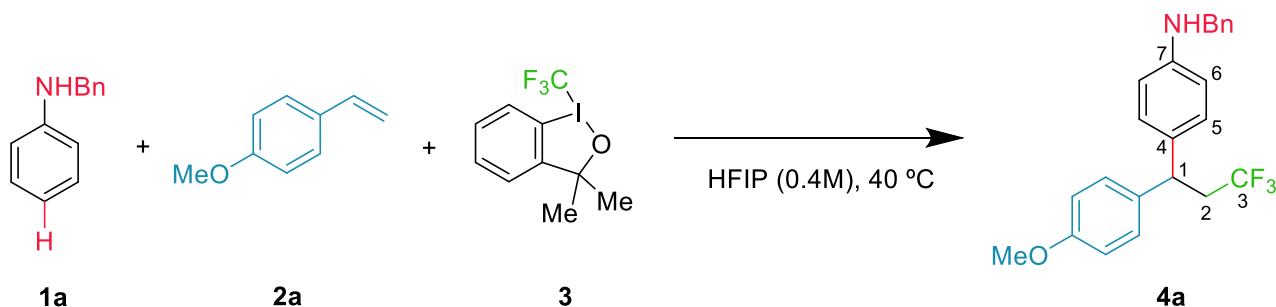

From aniline **1a** (36.7 mg, 0.2 mmol), alkene **2a** (26.8 mg, 0.2 mmol) and trifluoromethyl reagent **3** (66.0 mg, 0.2 mmol), in 0.5 mL of HFIP, following the general procedure, aniline **4a** was obtained. Chromatographic purification (gradient elution: 0:100 → 10:90 Et<sub>2</sub>O – hexane) gave **4a** (48.2 mg, 72%), as a yellow oil.

Data for **4a**: *R<sub>f</sub>* 0.3 (30% Et<sub>2</sub>O – hexane). <sup>1</sup>H NMR (400 MHz, DMSO-*d*<sub>6</sub>) δ 7.40 – 7.17 (7H, m, Ar), 7.05 (2H, d, *J* = 8.6 Hz, 5-H), 6.83 (2H, d, *J* = 8.7 Hz, Ar), 6.51 (2H, d, *J* = 8.6 Hz, 6-H), 6.13 (1H, t, *J* = 6.0 Hz, NH), 4.23 (2H, d, *J* = 6.0 Hz, CH<sub>2</sub> Bn), 4.08 (1H, t, *J* = 7.6 Hz, 1-H), 3.69 (3H, s, OMe), 2.99 (2H, m, 2-H<sub>2</sub>). <sup>13</sup>C NMR (101 MHz, DMSO-*d*<sub>6</sub>) δ 157.6 (1C, C Ar), 147.2 (1C, C Ar), 140.4 (1C, C Ar), 136.3 (1C, C Ar), 131.0 (1C, C Ar), 128.3 (2C, CH Ar), 128.2 (2C, CH Ar), 127.7 (2C, CH Ar), 127.2 (2C, CH Ar), 126.6 (1C, CH Ar), 127.1 (1C, q, *J* = 277.8 Hz, CF<sub>3</sub>), 113.8 (2C, CH Ar), 112.3 (2C, CH Ar), 54.9 (1C, OMe), 46.7 (1C, CH<sub>2</sub> Bn), 43.1 (1C, q, *J* = 3.1 Hz, C-1), 38.3 (1C, q, *J* = 25.8 Hz, C-2). <sup>19</sup>F NMR (376 MHz, DMSO-*d*<sub>6</sub>) δ –63.6 (3F, CF<sub>3</sub>). HRMS (EI): calculated for C<sub>23</sub>H<sub>22</sub>F<sub>3</sub>NO [M]<sup>+</sup> requires *m/z* 385.1648, found *m/z* 385.1635.

### *N*-Methyl-4-[3,3,3-trifluoro-1-(4-methoxyphenyl)propyl]aniline, **4b**.

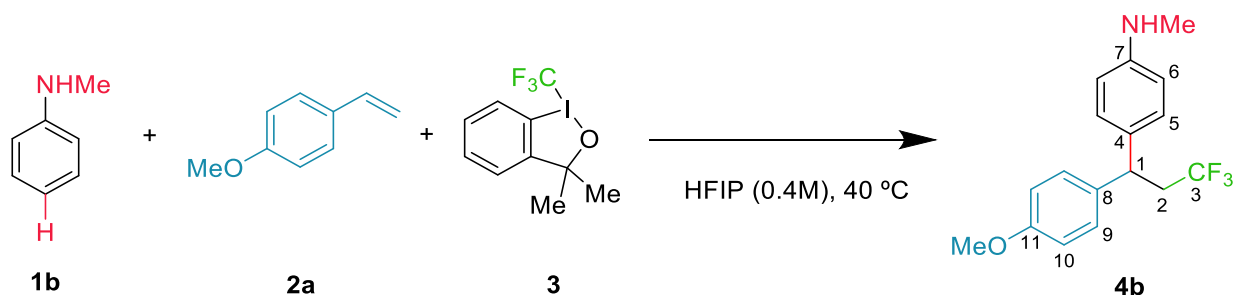

From aniline **1b** (21.4 mg, 0.2 mmol), alkene **2a** (26.8 mg, 0.2 mmol) and trifluoromethyl reagent **3** (66.0 mg, 0.2 mmol), in 0.5 mL of HFIP, following the general procedure, aniline **4b** was obtained. Chromatographic purification (gradient elution: 0:100 → 30:70 Et<sub>2</sub>O – hexane) gave **4b** (28.2 mg, 50%), as a colourless oil.

Data for **4b**: *R<sub>f</sub>* 0.1 (30% Et<sub>2</sub>O – hexane). <sup>1</sup>H NMR (400 MHz, CDCl<sub>3</sub>) δ 7.15 (2H, d, *J* = 8.7 Hz, 9-H), 7.04 (2H, d, *J* = 8.5 Hz, 5-H), 6.83 (2H, d, *J* = 8.7 Hz, 10-H), 6.55 (2H, d, *J* = 8.6 Hz, 6-H), 4.19 (1H, t, *J* = 7.4 Hz, 1-H), 3.77 (3H, s, OMe), 3.65 (1H, br s, NH), 2.82 (2H, qd, *J* = 10.5 and 7.4 Hz, 2-H<sub>2</sub>), 2.80 (3H, s, NMe). <sup>13</sup>C NMR (101 MHz, CDCl<sub>3</sub>) δ 158.3 (1C, C Ar), 148.1 (1C, C

Ar), 135.9 (1C, C Ar), 132.1 (1C, C Ar), 128.5 (2C, CH Ar), 128.3 (2C, C-5), 126.7 (1C, q,  $J = 277.8$  Hz, CF<sub>3</sub>), 114.1 (2C, CH Ar), 112.7 (2C, C-6), 55.4 (1C, OMe), 43.5 (1C, C-1), 40.1 (1C, q,  $J = 26.9$  Hz, C-2), 30.9 (1C, NMe). **<sup>19</sup>F NMR (376 MHz, CDCl<sub>3</sub>)**  $\delta$  -63.6 (3F, CF<sub>3</sub>). **HRMS (EI):** calculated for C<sub>17</sub>H<sub>18</sub>F<sub>3</sub>NO [M]<sup>+</sup> requires  $m/z$  309.1335, found 309.1328.

#### 4-[3,3,3-Trifluoro-1-(4-methoxyphenyl)propyl]aniline, **4c**.

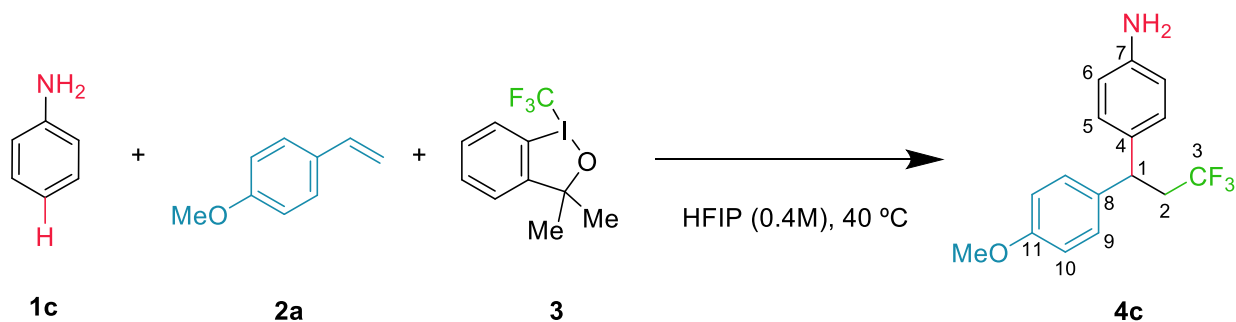

From aniline **1c** (18.6 mg, 0.20 mmol), alkene **2a** (26.8 mg, 0.20 mmol) and trifluoromethyl reagent **3** (66.0 mg, 0.20 mmol), in 0.5 mL of HFIP, following the general procedure, aniline **4c** was obtained. Chromatographic purification (gradient elution: 20:80 → 40:60 Et<sub>2</sub>O – hexane) gave **4c** (14.5 mg, 25%), as a brownish oil.

Data for **4c**:  $R_f$  0.10 (60% Et<sub>2</sub>O – hexane). **<sup>1</sup>H NMR (400 MHz, CDCl<sub>3</sub>)**  $\delta$  7.13 (2H, d,  $J = 8.7$  Hz, 9-H), 7.01 (2H, d,  $J = 8.4$  Hz, 5-H), 6.82 (2H, d,  $J = 8.7$  Hz, 10-H), 6.65 (2H, d,  $J = 8.4$  Hz, 6-H), 4.18 (1H, t,  $J = 7.4$  Hz, 1-H), 3.77 (3H, s, OMe), 2.81 (2H, qd,  $J = 10.5$  and 7.5 Hz, 2-H<sub>2</sub>). **<sup>13</sup>C NMR (101 MHz, CDCl<sub>3</sub>)**  $\delta$  158.3 (1C, C Ar), 144.5 (1C, C Ar), 135.7 (1C, C Ar), 133.8 (1C, C Ar), 128.5 (2C, CH Ar), 128.4 (2C, CH Ar), 126.7 (1C, q,  $J = 277.6$  Hz, CF<sub>3</sub>), 115.8 (2C, CH Ar), 114.1 (2C, CH Ar), 55.4 (1C, OMe), 43.6 (1C, C-1), 40.0 (1C, q,  $J = 27.0$  Hz, C-2). **<sup>19</sup>F NMR (376 MHz, CDCl<sub>3</sub>)**  $\delta$  -63.6 (3F, CF<sub>3</sub>). **HRMS (ESI):** calculated for C<sub>16</sub>H<sub>17</sub>F<sub>3</sub>NO [M+H]<sup>+</sup> requires  $m/z$  296.1257, found 296.1257.

#### *N,N*-dimethyl-4-[3,3,3-trifluoro-1-(4-methoxyphenyl)propyl]aniline, **4d**.

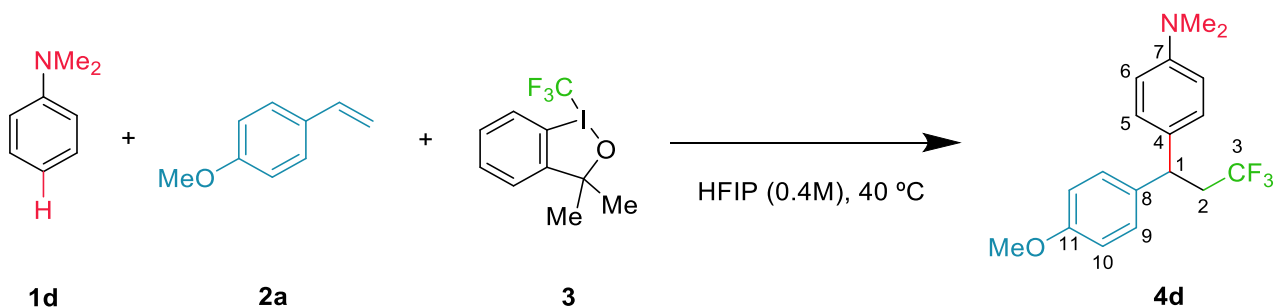

From aniline **1d** (24.0 mg, 0.2 mmol), alkene **2a** (26.8 mg, 0.2 mmol) and trifluoromethyl reagent **3** (66.0 mg, 0.2 mmol), in 0.5 mL of HFIP, following the general procedure, aniline **4d** was obtained. Chromatographic purification (gradient elution: 0:100 → 15:85 Et<sub>2</sub>O – hexane) gave **4d** (33.6 mg, 52%), as a colourless oil.

Data for **4d**:  $R_f$  0.15 (20% Et<sub>2</sub>O – hexane). <sup>1</sup>H NMR (400 MHz, CDCl<sub>3</sub>) δ 7.15 (2H, d,  $J$  = 8.7 Hz, 9-H), 7.09 (2H, d,  $J$  = 8.8 Hz, 5-H), 6.83 (2H, d,  $J$  = 8.7 Hz, 10-H), 6.68 (2H, d,  $J$  = 8.3 Hz, 6-H), 4.20 (1H, t,  $J$  = 7.4 Hz, 1-H), 3.77 (3H, s, OMe), 2.91 (6H, s, NMe<sub>2</sub>), 2.82 (2H, qd,  $J$  = 10.5 and 7.4 Hz, 2-H<sub>2</sub>). <sup>13</sup>C NMR (101 MHz, CDCl<sub>3</sub>) δ 158.3 (1C, C Ar), 149.4 (1C, C Ar), 135.9 (1C, C Ar), 131.3 (1C, C Ar), 128.5 (2C, CH Ar), 128.1 (2C, C-5), 126.7 (1C, q,  $J$  = 277.9 Hz, CF<sub>3</sub>), 114.1 (2C, CH Ar), 113.0 (2C, C-6), 55.4 (1C, OMe), 43.4 (1C, q,  $J$  = 2.7 Hz, C-1), 40.8 (2C, NMe<sub>2</sub>), 40.1 (1C, q,  $J$  = 26.8 Hz, C-2). <sup>19</sup>F NMR (376 MHz, CDCl<sub>3</sub>) δ –63.6 (3F, CF<sub>3</sub>). HRMS (ESI): calculated for C<sub>18</sub>H<sub>21</sub>F<sub>3</sub>NO [M+H]<sup>+</sup> requires  $m/z$  324.1570, found  $m/z$  324.1572.

***N*-Benzyl-2-methyl-4-[3,3,3-trifluoro-1-(4-methoxyphenyl)propyl]aniline, 4e.**

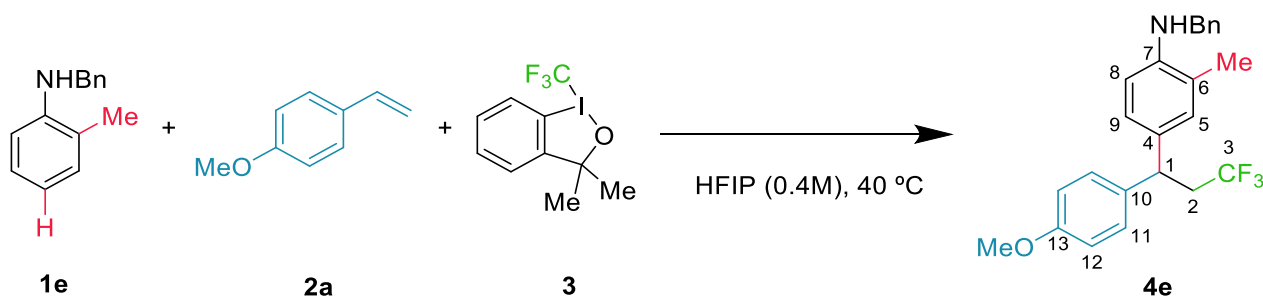

From aniline **1e** (39.5 mg, 0.2 mmol), alkene **2a** (26.8 mg, 0.2 mmol) and trifluoromethyl reagent **3** (66.0 mg, 0.2 mmol), in 0.5 mL of HFIP, following the general procedure, aniline **4e** was obtained. Chromatographic purification (gradient elution: 10:90 → 15:85 Et<sub>2</sub>O – hexane) gave **4e** (51.4 mg, 64%), as a colourless oil.

Data for **4e**:  $R_f$  0.40 (30% Et<sub>2</sub>O – hexane). <sup>1</sup>H NMR (400 MHz, CDCl<sub>3</sub>) δ 7.43 – 7.29 (5H, m, Ar), 7.18 (2H, d,  $J$  = 8.7 Hz, 11-H), 6.98 (1H, d,  $J$  = 8.2 Hz, 9-H), 6.94 (1H, s, 5-H), 6.85 (2H, d,  $J$  = 8.7 Hz, 12-H), 6.57 (1H, d,  $J$  = 8.2 Hz, 8-H), 4.35 (2H, s, CH<sub>2</sub> Bn), 4.19 (1H, t,  $J$  = 7.4 Hz, 1-H), 3.79 (3H, s, OMe), 2.84 (2H, qd,  $J$  = 10.5 and 7.4 Hz, 2-H<sub>2</sub>), 2.15 (3H, s, Me). <sup>13</sup>C NMR (101 MHz, CDCl<sub>3</sub>) δ 158.2 (1C, C Ar), 144.9 (1C, C Ar), 139.5 (1C, C Ar), 135.9 (1C, C Ar), 131.9 (1C, C Ar), 129.4 (1C, C-9), 128.8 (2C, CH Ar), 128.5 (2C, CH Ar), 127.7 (2C, CH Ar), 127.4 (1C, CH Ar), 126.7 (1C, q,  $J$  = 277.8 Hz, CF<sub>3</sub>), 125.8 (1C, C-5), 122.3 (1C, CH Ar), 114.0 (2C, CH Ar), 110.1 (1C, C-6), 55.3 (1C, OMe), 48.5 (1C, CH<sub>2</sub> Bn), 43.5 (1C, C-1), 40.1 (1C, q,  $J$  = 26.8 Hz, C-2), 17.8 (1C, Me). <sup>19</sup>F NMR (376 MHz, CDCl<sub>3</sub>) δ –63.6 (3F, CF<sub>3</sub>). HRMS (EI): calculated for C<sub>24</sub>H<sub>24</sub>F<sub>3</sub>NO [M]<sup>+</sup> requires  $m/z$  399.1810, found  $m/z$  399.1797.

### *N*,2-Dienzyl-4-[3,3,3-trifluoro-1-(4-methoxyphenyl)propyl]aniline, **4f**.

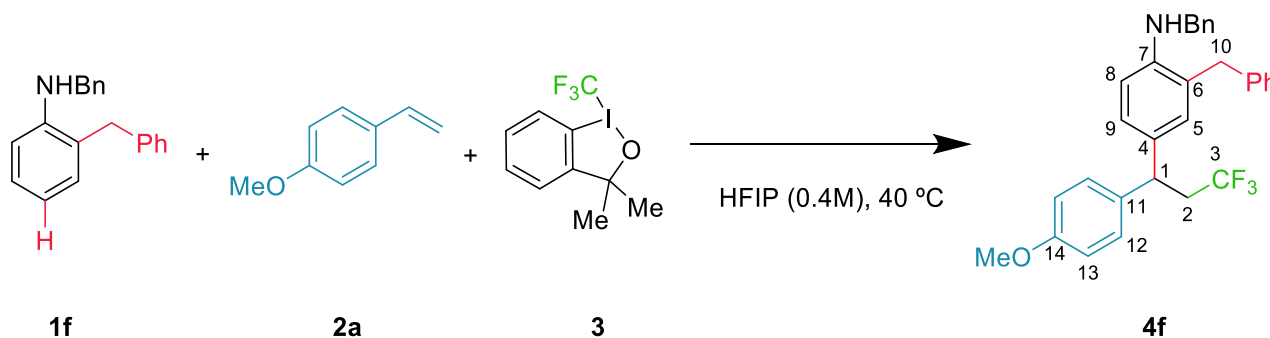

From aniline **1f** (52.2 mg, 0.2 mmol), alkene **2a** (26.8 mg, 0.2 mmol) and trifluoromethyl reagent **3** (66.0 mg, 0.2 mmol), in 0.5 mL of HFIP, following the general procedure, aniline **4f** was obtained. Chromatographic purification (gradient elution: 5:95 → 20:80 Et<sub>2</sub>O – hexane) gave **4f** (51.5 mg, 57%), as a colourless oil.

Data for **4f**: *R*<sub>f</sub> 0.50 (30% Et<sub>2</sub>O – hexane). <sup>1</sup>H NMR (400 MHz, CDCl<sub>3</sub>) δ 7.35 – 7.22 (6H, m, Ar), 7.18 (2H, d, *J* = 8.6 Hz, 12-H), 7.16 (2H, d, *J* = 7.9 Hz, Ar), 7.10 (2H, d, *J* = 7.7 Hz, Ar), 7.02 (1H, d, *J* = 8.2 Hz, 9-H), 7.00 (1H, s, 5-H), 6.86 (2H, d, *J* = 8.6 Hz, 13-H), 6.59 (1H, d, *J* = 8.2 Hz, 8-H), 4.23 (2H, s, CH<sub>2</sub> Bn), 4.23 (1H, t, *J* = 8.0 Hz, 1-H), 3.92 (2H, s, 10-H<sub>2</sub>), 3.80 (3H, s, OMe), 2.85 (2H, qd, *J* = 10.5 and 8.0 Hz, 2-H<sub>2</sub>). <sup>13</sup>C NMR (101 MHz, CDCl<sub>3</sub>) δ 158.2 (1C, C Ar), 144.7 (1C, C Ar), 139.2 (2C, C Ar), 135.8 (1C, C Ar), 132.0 (1C, C Ar), 130.0 (1C, C-5), 128.8 (2C, CH Ar), 128.6 (2C, CH Ar), 128.5 (2C, CH Ar), 128.5 (2C, CH Ar), 127.3 (2C, CH Ar), 127.2 (1C, CH Ar), 126.7 (1C, q, *J* = 279.8 Hz, CF<sub>3</sub>), 126.7 (1C, CH Ar), 126.6 (1C, C-9), 124.9 (1C, C Ar), 114.0 (2C, CH Ar), 111.2 (1C, C-8), 55.3 (1C, OMe), 48.2 (1C, CH<sub>2</sub> Bn), 43.5 (1C, C-1), 40.1 (1C, q, *J* = 26.8 Hz, C-2), 38.5 (1C, C-10). <sup>19</sup>F NMR (376 MHz, CDCl<sub>3</sub>) δ –63.5 (3F, CF<sub>3</sub>). HRMS (ESI): calculated for C<sub>30</sub>H<sub>29</sub>F<sub>3</sub>NO [M+H]<sup>+</sup> requires *m/z* 476.2196, found *m/z* 476.2191.

### *N*-Benzyl-5-[3,3,3-trifluoro-1-(4-methoxyphenyl)propyl]-[1,1'-biphenyl]-2-amine, **4g**.

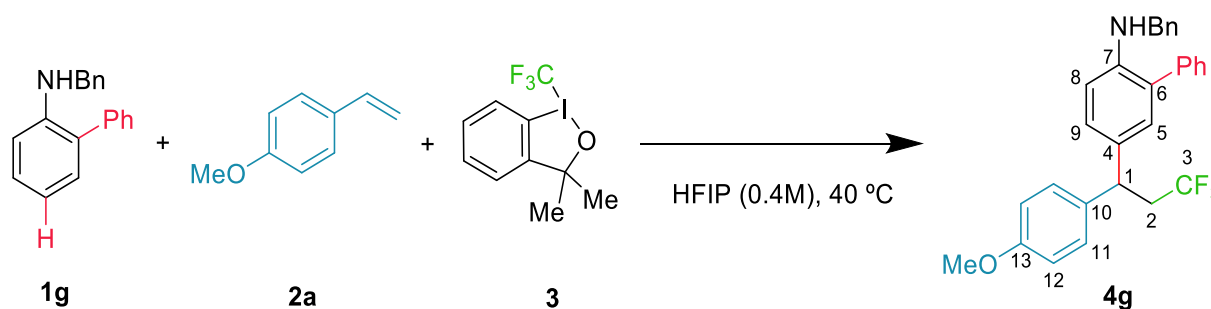

From aniline **1g** (43 mg, 0.2 mmol), alkene **2a** (26.8 mg, 0.2 mmol) and trifluoromethyl reagent **3** (66.0 mg, 0.2 mmol), in 0.5 mL of HFIP, following the general procedure, aniline **4g** was obtained. Chromatographic purification (gradient elution: 10:90 → 15:85 Et<sub>2</sub>O – hexane) gave **4g** (43.2 mg 56%), as a colourless oil.

Data for **4g**:  $R_f$  0.50 (30% Et<sub>2</sub>O – hexane). <sup>1</sup>H NMR (400 MHz, CDCl<sub>3</sub>) δ 7.46 (4H, m, Ar), 7.40 – 7.22 (6H, m, Ar), 7.18 (2H, d,  $J$  = 8.7 Hz, 11-H), 7.04 (1H, dd,  $J$  = 8.4 and 2.3 Hz, 9-H), 7.00 (1H, d,  $J$  = 2.2 Hz, 5-H), 6.84 (2H, d,  $J$  = 8.7 Hz, 12-H), 6.62 (1H, d,  $J$  = 8.4 Hz, 8-H), 4.30 (2H, s, CH<sub>2</sub> Bn), 4.22 (1H, t,  $J$  = 7.4 Hz, 1-H), 3.78 (3H, s, OMe), 2.85 (2H, qd,  $J$  = 10.5 and 7.4 Hz, 2-H<sub>2</sub>). <sup>13</sup>C NMR (101 MHz, CDCl<sub>3</sub>) δ 158.3 (1C, C Ar), 143.5 (1C, C Ar), 139.3 (1C, C Ar), 135.7 (1C, C Ar), 132.2 (1C, C Ar), 129.4 (2C, CH Ar), 129.3 (1C, C-5), 129.1 (2C, CH Ar), 128.7 (2C, CH Ar), 128.5 (2C, CH Ar), 128.0 (1C, C Ar), 127.5 (1C, C Ar), 127.5 (1C, C-9), 127.2 (4C, CH Ar), 126.6 (1C, q,  $J$  = 278.8 Hz, CF<sub>3</sub>), 114.1 (2C, CH Ar), 111.2 (1C, C-8), 55.3 (1C, OMe), 48.5 (1C, CH<sub>2</sub> Bn), 43.6 (1C, C-1), 40.1 (1C, q,  $J$  = 26.9 Hz, C-2). <sup>19</sup>F NMR (376 MHz, CDCl<sub>3</sub>) δ –63.6 (3F, CF<sub>3</sub>). HRMS (ESI): calculated for C<sub>29</sub>H<sub>27</sub>F<sub>3</sub>NO [M+H]<sup>+</sup> requires  $m/z$  462.2039, found  $m/z$  462.2036.

***N*-Benzyl-2-methoxy-4-[3,3,3-trifluoro-1-(4-methoxyphenyl)propyl]aniline, 4h.**

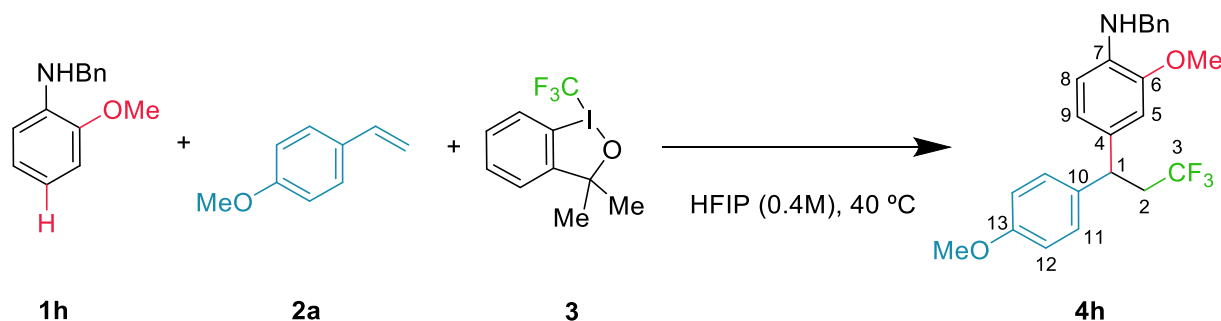

From aniline **1h** (42.7 mg, 0.20 mmol), alkene **2a** (26.8 mg, 0.20 mmol) and trifluoromethyl reagent **3** (66.0 mg, 0.20 mmol), in 0.5 mL of HFIP, following the general procedure, aniline **4h** was obtained. Chromatographic purification (gradient elution: 0:100 → 15:85 Et<sub>2</sub>O – hexane) gave **4h** (44.5 mg, 54%), as a colourless oil.

Data for **4h**:  $R_f$  0.5 (30% Et<sub>2</sub>O – hexane). <sup>1</sup>H NMR (400 MHz, CDCl<sub>3</sub>) δ 7.40 – 7.21 (5H, m, Ar), 7.15 (2H, d,  $J$  = 8.7 Hz, 11-H), 6.83 (2H, d,  $J$  = 8.7 Hz, 12-H), 6.70 (1H, dd,  $J$  = 8.1 and 1.9 Hz, 9-H), 6.60 (1H, d,  $J$  = 1.9 Hz, 5-H), 6.55 (1H, d,  $J$  = 8.1 Hz, 8-H), 4.30 (2H, s, CH<sub>2</sub> Bn), 4.19 (1H, t,  $J$  = 7.4 Hz, 1-H), 3.80 (3H, s, OMe), 3.77 (3H, s, OMe), 2.82 (2H, qd,  $J$  = 10.5 and 7.4 Hz, 2-H<sub>2</sub>). <sup>13</sup>C NMR (101 MHz, CDCl<sub>3</sub>) δ 158.3 (1C, C Ar), 147.2 (1C, C Ar), 139.3 (1C, C Ar), 136.4 (1C, C Ar), 135.7 (1C, C Ar), 132.3 (1C, C Ar), 128.7 (2C, CH Ar), 128.5 (2C, CH Ar), 127.8 (2C, CH Ar), 127.4 (1C, CH Ar), 126.7 (1C, q,  $J$  = 278.0 Hz, CF<sub>3</sub>), 119.7 (1C, C-9), 114.1 (2C, CH Ar), 110.6 (1C, C-8), 109.3 (1C, C-5), 55.6 (1C, OMe), 55.4 (1C, OMe), 48.5 (1C, CH<sub>2</sub> Bn), 44.0 (1C, C-1), 40.2 (1C, q,  $J$  = 26.9 Hz, C-2). <sup>19</sup>F NMR (376 MHz, CDCl<sub>3</sub>) δ –63.6 (3F, CF<sub>3</sub>). HRMS (ESI): calculated for C<sub>24</sub>H<sub>25</sub>F<sub>3</sub>NO<sub>2</sub> [M+H]<sup>+</sup> requires  $m/z$  416.1832, found  $m/z$  416.1837.



### *N*-Benzyl-2-chloro-4-[3,3,3-trifluoro-1-(4-methoxyphenyl)propyl]aniline, **4i**.

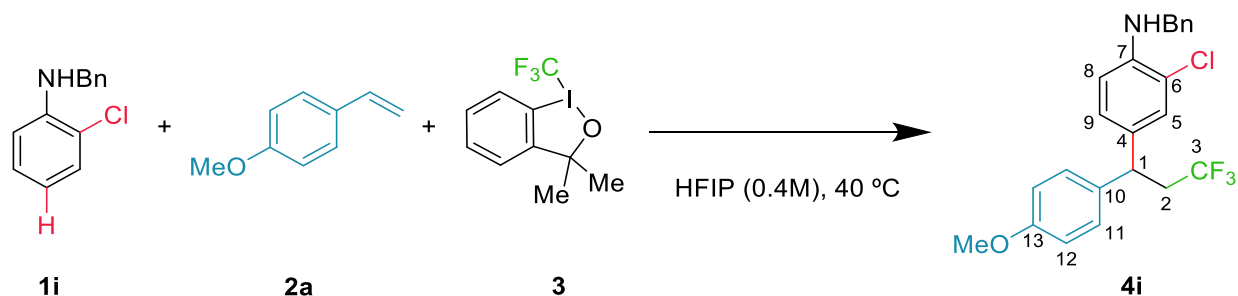

From aniline **1i** (42.8 mg, 0.2 mmol), alkene **2a** (26.8 mg, 0.2 mmol) and trifluoromethyl reagent **3** (66.0 mg, 0.2 mmol), in 0.5 mL of HFIP, following the general procedure, aniline **4i** was obtained. Chromatographic purification (gradient elution: 100% toluene) gave **4i** (41.3 mg, 50%), as a colourless oil.

Data for **4i**:  $R_f$  0.60 (100% toluene).  $^1\text{H NMR}$  (400 MHz,  $\text{CDCl}_3$ )  $\delta$  7.41 – 7.24 (5H, m, Ar), 7.14 (1H, s, 5-H), 7.14 (2H, d,  $J = 8.5$  Hz, 11-H), 6.96 (1H, dd,  $J = 8.4$  and 2.1 Hz, 9-H), 6.85 (2H, d,  $J = 8.7$  Hz, 12-H), 6.57 (1H, d,  $J = 8.4$  Hz, 8-H), 4.37 (1H, br s, NH), 4.16 (1H, t,  $J = 7.4$  Hz, 1-H), 3.78 (2H, s,  $\text{CH}_2$  Bn), 2.80 (1H, qd,  $J = 10.4$  and 7.5 Hz, 2- $\text{H}_2$ ).  $^{13}\text{C NMR}$  (101 MHz,  $\text{CDCl}_3$ )  $\delta$  158.4 (1C, C Ar), 142.6 (1C, C Ar), 138.8 (1C, C Ar), 135.1 (1C, C Ar), 132.5 (1C, C Ar), 128.8 (2C, CH Ar), 128.4 (2C, CH Ar), 128.1 (1C, C-5), 127.5 (1C, CH Ar), 127.4 (2C, CH Ar), 126.8 (1C, C-9), 126.5 (1C, q,  $J = 277.7$  Hz,  $\text{CF}_3$ ), 119.3 (1C, C Ar), 114.2 (2C, CH Ar), 111.7 (1C, C-8), 55.3 (1C, OMe) 48.1 (1C,  $\text{CH}_2$  Bn), 43.3 (1C, C-1), 39.9 (1C, q,  $J = 27.1$  Hz, C-2).  $^{19}\text{F NMR}$  (376 MHz,  $\text{CDCl}_3$ )  $\delta$  -63.6 (3F,  $\text{CF}_3$ ). HRMS (EI): calculated for  $\text{C}_{23}\text{H}_{21}\text{ClF}_3\text{NO}$   $[\text{M}]^+$  requires  $m/z$  419.1258, found  $m/z$  419.1271.

### *N*-Benzyl-2-bromo-4-[3,3,3-trifluoro-1-(4-methoxyphenyl)propyl]aniline, **4j**.

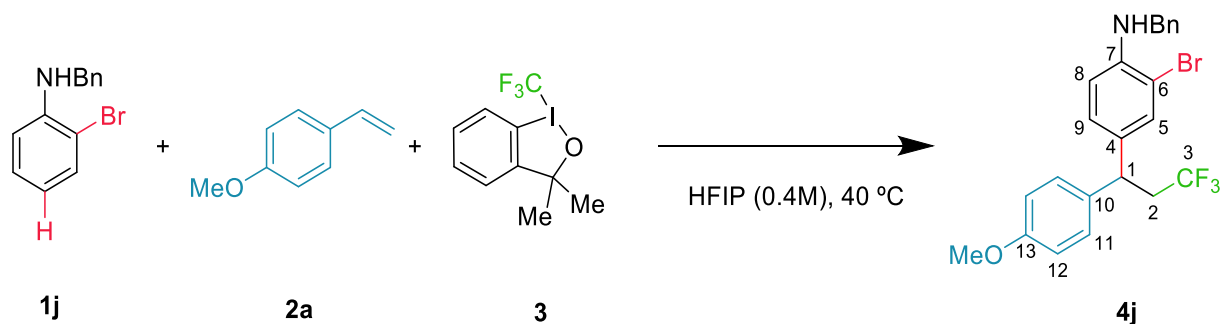

From aniline **1j** (52.4 mg, 0.2 mmol), alkene **2a** (26.8 mg, 0.2 mmol) and trifluoromethyl reagent **3** (66.0 mg, 0.2 mmol), in 0.5 mL of HFIP, following the general procedure, aniline **4j** was obtained. Chromatographic purification (gradient elution: 5:95  $\rightarrow$  10:90  $\text{Et}_2\text{O}$  – hexane) gave **4j** (52.8 mg, 58%), as a colourless oil.

Data for **4j**:  $R_f$  0.30 (30%  $\text{Et}_2\text{O}$  – hexane).  $^1\text{H NMR}$  (400 MHz,  $\text{CDCl}_3$ )  $\delta$  7.42 – 7.26 (5H, m, Ar), 7.33 (1H, d,  $J = 2.1$  Hz, 5-H), 7.15 (2H, d,  $J = 8.7$  Hz, 11-H), 7.01 (1H, dd,  $J = 8.4$  and 2.1 Hz,

9-H), 6.86 (2H d,  $J = 8.7$  Hz, 12-H), 6.56 (1H, d,  $J = 8.4$  Hz, 8-H), 4.74 (1H, br s, NH), 4.38 (2H, s, CH<sub>2</sub> Bn), 4.17 (1H, t,  $J = 7.4$  Hz, 1-H), 3.79 (3H, s, OMe), 2.80 (2H, qd,  $J = 10.4$  and  $7.7$  Hz, 2-H<sub>2</sub>). <sup>13</sup>C NMR (101 MHz, CDCl<sub>3</sub>) δ 158.5 (1C, C Ar), 143.6 (1C, C Ar), 138.7 (1C, C Ar), 135.1 (1C, C Ar), 133.1 (1C, C Ar), 131.3 (1C, C-5), 128.9 (2C, CH Ar), 128.5 (2C, CH Ar), 127.54 (1C, CH Ar), 127.51 (1C, C-9), 127.4 (2C, CH Ar), 126.5 (1C, q,  $J = 277.8$  Hz, CF<sub>3</sub>), 114.2 (2C, C-12), 111.8 (1C, C-8), 109.9 (1C, C Ar), 55.3 (1C, OMe), 48.2 (1C, CH<sub>2</sub> Bn), 43.2 (1C, C-1), 39.9 (1C, q,  $J = 27.1$  Hz, C-2). <sup>19</sup>F NMR (376 MHz, CDCl<sub>3</sub>) δ -63.6 (3F, CF<sub>3</sub>). HRMS (ESI): calculated for C<sub>23</sub>H<sub>22</sub>BrF<sub>3</sub>NO [M+H]<sup>+</sup>  $m/z$  requires 464.0831, found  $m/z$  464.0798.

***N*-Benzyl-3-methyl-4-[3,3,3-trifluoro-1-(4-methoxyphenyl)propyl]aniline, 4k.**

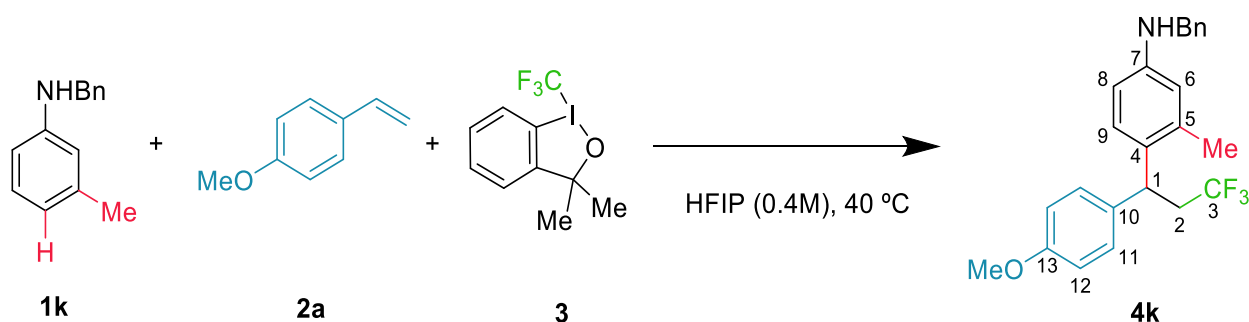

From aniline **1k** (39.5 mg, 0.2 mmol), alkene **2a** (26.8 mg, 0.2 mmol) and trifluoromethyl reagent **3** (66.0 mg, 0.2 mmol), in 0.5 mL of HFIP, following the general procedure, aniline **4k** was obtained. Chromatographic purification (gradient elution: 5:95 → 15:95 Et<sub>2</sub>O – hexane) gave **4k** (40.3 mg, 50%), as a colourless oil.

Data for **4k**:  $R_f$  0.30 (30% Et<sub>2</sub>O – hexane). <sup>1</sup>H NMR (400 MHz, CDCl<sub>3</sub>) δ 7.40 – 7.25 (5H, m, Ar), 7.13 (2H, d,  $J = 8.7$  Hz, 11-H), 7.05 (1H, d,  $J = 8.4$  Hz, 9-H), 6.81 (2H, d,  $J = 8.7$  Hz, 12-H), 6.53 (1H, dd,  $J = 8.4$  and  $2.4$  Hz, 8-H), 6.49 (1H, d,  $J = 2.4$  Hz, 6-H), 4.41 (1H, t,  $J = 7.2$  Hz, 1-H), 4.30 (2H, s, CH<sub>2</sub> Bn), 3.77 (3H, s, OMe), 2.79 (2H, m, 2-H<sub>2</sub>), 2.24 (3H, s, Me). <sup>13</sup>C NMR (101 MHz, CDCl<sub>3</sub>) δ 158.2 (1C, C Ar), 146.2 (1C, C Ar), 139.2 (1C, C Ar), 136.9 (1C, C Ar), 135.2 (1C, C Ar), 131.0 (1C, C Ar), 128.9 (2C, CH Ar), 128.8 (2C, CH Ar), 127.9 (2C, CH Ar), 127.5 (1C, CH Ar), 127.3 (1C, C-9), 126.8 (1C, q,  $J = 277.8$  Hz, CF<sub>3</sub>), 115.9 (1C, C-6), 114.0 (2C, CH Ar), 111.1 (1C, C-8), 55.3 (1C, OMe), 48.9 (1C, CH<sub>2</sub> Bn), 40.2 (1C, q,  $J = 26.8$  Hz, C-2), 39.2 (1C, C-1), 20.1 (1C, Me). <sup>19</sup>F NMR (376 MHz, CDCl<sub>3</sub>) δ -63.7 (1C, CF<sub>3</sub>). HRMS (ESI): calculated for C<sub>24</sub>H<sub>25</sub>F<sub>3</sub>NO [M+H]<sup>+</sup>  $m/z$  requires 400.1883, found  $m/z$  400.1878.

### *N*-Benzyl-6-[3,3,3-trifluoro-1-(4-methoxyphenyl)propyl]-[1,1'-biphenyl]-3-amine, **4l**.

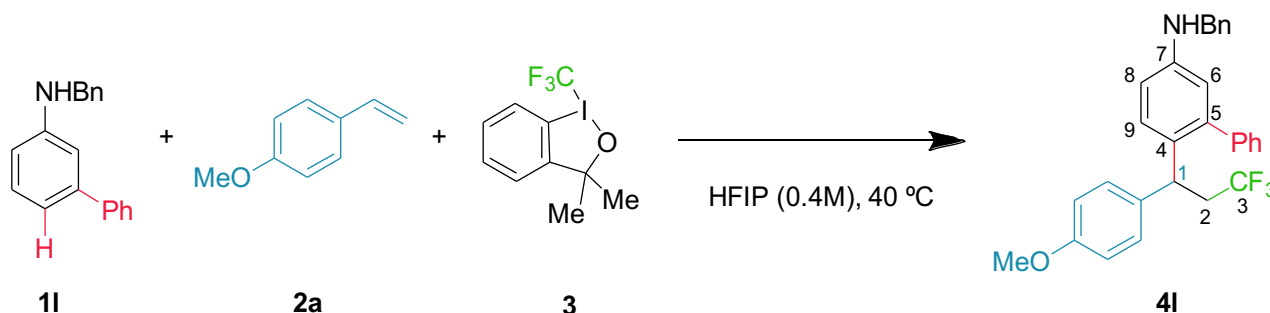

From aniline **1l** (51.4 mg, 0.2 mmol), alkene **2a** (26.8 mg, 0.2 mmol) and trifluoromethyl reagent **3** (66.0 mg, 0.2 mmol), in 0.5 mL of HFIP, following the general procedure, aniline **4l** was obtained. Chromatographic purification (gradient elution: 0:100 → 20:80 Et<sub>2</sub>O – hexane) gave **4l** (55.9 mg, 61%), as a colourless oil.

Data for **4l**: *R<sub>f</sub>* 0.50 (30% Et<sub>2</sub>O – hexane). <sup>1</sup>H NMR (400 MHz, CDCl<sub>3</sub>) δ 7.44 – 7.26 (8H, m, Ar), 7.22 (1H, d, *J* = 8.5 Hz, 9-H), 7.21 – 7.14 (2H, m, Ar), 6.93 (2H, d, *J* = 8.7 Hz, Ar), 6.76 (2H, d, *J* = 8.7 Hz, Ar), 6.69 (1H, dd, *J* = 8.5 and 2.6 Hz, 8-H), 6.53 (1H, d, *J* = 2.6 Hz, 6-H), 4.35 (1H, t, *J* = 7.4 Hz, 1-H), 4.31 (2H, s, CH<sub>2</sub> Bn), 3.77 (3H, s, OMe), 2.88 – 2.63 (2H, m, 2-H<sub>2</sub>). <sup>13</sup>C NMR (101 MHz, CDCl<sub>3</sub>) δ 158.0 (1C, C Ar), 146.0 (1C, C Ar), 143.0 (1C, C Ar), 141.7 (1C, C Ar), 139.1 (1C, C Ar), 135.8 (1C, C Ar), 129.8 (1C, C Ar), 129.3 (2C, CH Ar), 128.7 (2C, CH Ar), 128.5 (2C, CH Ar), 128.1 (2C, CH Ar), 127.8 (2C, CH Ar), 127.7 (1C, CH Ar), 127.5 (1C, CH Ar), 127.1 (1C, CH Ar), 126.3 (1C, q, *J* = 277.9 Hz, CF<sub>3</sub>), 114.9 (1C, C-6), 113.8 (2C, CH Ar), 112.6 (1C, C-8), 55.3 (1C, OMe), 48.7 (1C, CH<sub>2</sub> Bn), 40.3 (1C, q, *J* = 26.8 Hz, C-2), 39.0 (1C, C-1). <sup>19</sup>F NMR (376 MHz, CDCl<sub>3</sub>) δ –63.6 (3F, CF<sub>3</sub>). HRMS (ESI): calculated for C<sub>29</sub>H<sub>27</sub>F<sub>3</sub>NO [M+H]<sup>+</sup> *m/z* requires 462.2039, found *m/z* 462.2037.

### *N*-Benzyl-3-ethynyl-4-[3,3,3-trifluoro-1-(4-methoxyphenyl)propyl]aniline, **4m**.

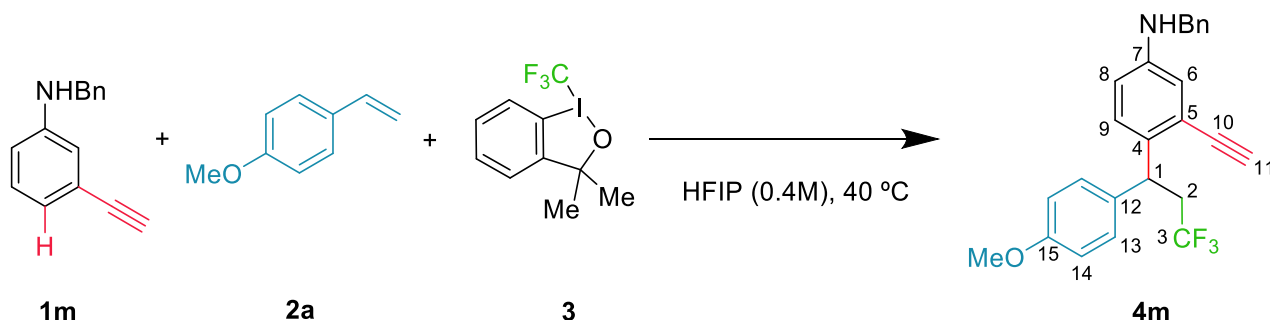

From aniline **1m** (41.5 mg, 0.2 mmol), alkene **2a** (26.8 mg, 0.2 mmol) and trifluoromethyl reagent **3** (66.0 mg, 0.2 mmol), in 0.5 mL of HFIP, following the general procedure, aniline **4m** was obtained. Chromatographic purification (100% toluene elution) gave **4m** (50.1 mg, 61%), as a colourless oil.

Data for **4m**:  $R_f$  0.20 (100% toluene).  $^1\text{H NMR}$  (400 MHz,  $\text{CDCl}_3$ )  $\delta$  7.39 – 7.24 (5H, m, Ar), 7.21 (2H, d,  $J = 8.7$  Hz, 13-H), 7.00 (1H, d,  $J = 8.5$  Hz, 9-H), 6.83 (2H, d,  $J = 8.7$  Hz, 14-H), 6.79 (1H, d,  $J = 2.6$  Hz, 6-H), 6.60 (1H, dd,  $J = 8.5$  and 2.6 Hz, 8-H), 4.85 (1H, t,  $J = 7.4$  Hz, 1-H), 4.28 (2H, s,  $\text{CH}_2$  Bn), 3.77 (3H, s, OMe), 3.29 (1H, s, 11-H), 2.83 (2H qd,  $J = 10.4$  and 7.5 Hz, 2- $\text{H}_2$ ).  $^{13}\text{C NMR}$  (101 MHz,  $\text{CDCl}_3$ )  $\delta$  158.3 (1C, C Ar), 146.1 (1C, C Ar), 138.8 (1C, C Ar), 134.9 (1C, C Ar), 134.7 (1C, C Ar), 128.8 (2C, CH Ar), 128.7 (2C, CH Ar), 127.7 (2C, CH Ar), 127.6 (1C, CH Ar), 127.5 (1C, CH Ar), 126.6 (1C, q,  $J = 277.8$  Hz,  $\text{CF}_3$ ), 121.9 (1C, C Ar), 117.1 (1C, C-6), 114.6 (1C, C-8), 113.9 (2C, CH Ar), 82.4 (1C, C-10), 81.4 (1C, C-11), 55.3 (1C, OMe), 48.5 (1C,  $\text{CH}_2$  Bn), 40.5 (1C, C-1), 39.4 (1C, q,  $J = 27.2$  Hz, C-2).  $^{19}\text{F NMR}$  (376 MHz,  $\text{CDCl}_3$ )  $\delta$  -63.8 (3F,  $\text{CF}_3$ ). **HRMS** (ESI): calculated for  $\text{C}_{25}\text{H}_{23}\text{F}_3\text{NO}$   $[\text{M}+\text{H}]^+$  requires  $m/z$  410.1726, found  $m/z$  410.1723.

**Methyl 2-{5-(benzylamino)-2-[3,3,3-trifluoro-1-(4-methoxyphenyl)propyl]phenyl}acetate, 4n.**

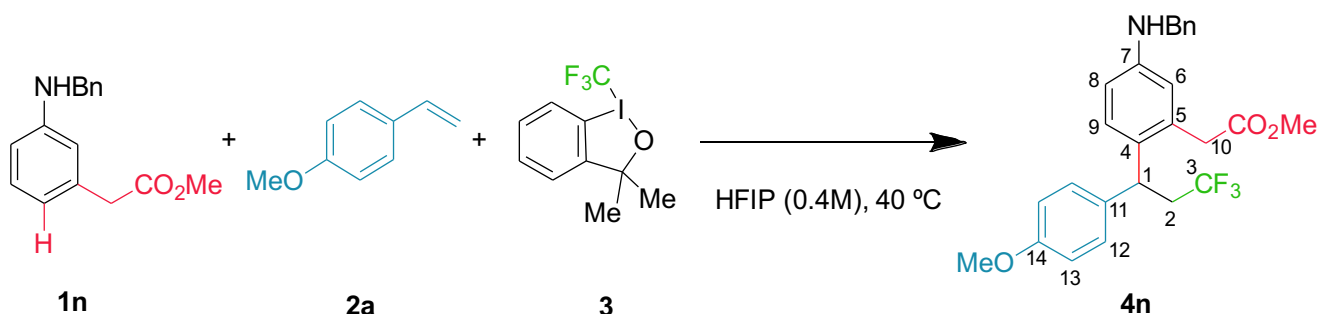

From aniline **1n** (51.0 mg, 0.2 mmol), alkene **2a** (26.8 mg, 0.2 mmol) and trifluoromethyl reagent **3** (66.0 mg, 0.2 mmol), in 0.5 mL of HFIP, following the general procedure, aniline **4n** was obtained. Chromatographic purification (gradient elution: 0:100  $\rightarrow$  20:80  $\text{Et}_2\text{O}$  – hexane) gave **4n** (49.7 mg, 54%), as an orange oil.

Data for **4n**:  $R_f$  0.1 (30%  $\text{Et}_2\text{O}$  – hexane).  $^1\text{H NMR}$  (400 MHz,  $\text{CDCl}_3$ )  $\delta$  7.41 – 7.25 (5H, m, Ar), 7.14 (2H, d,  $J = 8.6$  Hz, 12-H), 7.10 (1H, d,  $J = 8.4$  Hz, 9-H), 6.82 (2H, d,  $J = 8.6$  Hz, 13-H), 6.60 (1H, dd,  $J = 8.4$ , 2.4 Hz, 8-H), 6.53 (1H, d,  $J = 2.3$  Hz, 6-H), 4.47 (1H, t,  $J = 7.2$  Hz, 1-H), 4.30 (2H, s,  $\text{CH}_2$  Bn), 3.77 (3H, s, OMe), 3.64 (1H, d,  $J = 15.5$  Hz, 10- $\text{H}_A$ ), 3.62 (3H, s,  $\text{CO}_2\text{Me}$ ), 3.52 (1H, d,  $J = 15.5$  Hz, 10- $\text{H}_B$ ), 2.88 – 2.72 (2H, m, 2- $\text{H}_2$ ).  $^{13}\text{C NMR}$  (101 MHz,  $\text{CDCl}_3$ )  $\delta$  171.9 (1C, C=O), 158.3 (1C, C Ar), 146.6 (1C, C Ar), 139.1 (1C, C Ar), 134.9 (1C, C Ar), 133.1 (1C, C Ar), 130.7 (1C, C Ar), 128.9 (2C, CH Ar), 128.8 (2C, CH Ar), 128.1 (1C, CH Ar), 127.8 (2C, CH Ar), 127.5 (1C, CH Ar), 126.6 (1C, q,  $J = 277.9$  Hz,  $\text{CF}_3$ ), 116.0 (1C, CH Ar), 114.0 (2C, CH Ar), 112.4 (1C, CH Ar), 55.3 (1C, OMe), 52.1 (1C,  $\text{CO}_2\text{Me}$ ), 48.7 (1C,  $\text{CH}_2$  Bn), 40.3 (1C, q,  $J = 26.9$  Hz, C-2), 39.02 (1C, C-10), 38.97 (1C, C-1).  $^{19}\text{F NMR}$  (376 MHz,  $\text{CDCl}_3$ )  $\delta$  -63.7 (3F,  $\text{CF}_3$ ). **HRMS** (ESI): calculated for  $\text{C}_{26}\text{H}_{27}\text{F}_3\text{NO}_3$   $[\text{M}+\text{H}]^+$  requires  $m/z$  458.1938, found  $m/z$  458.1935.

### *N*-Benzyl-3-fluoro-4-[3,3,3-trifluoro-1-(4-methoxyphenyl)propyl]aniline, **4o**.

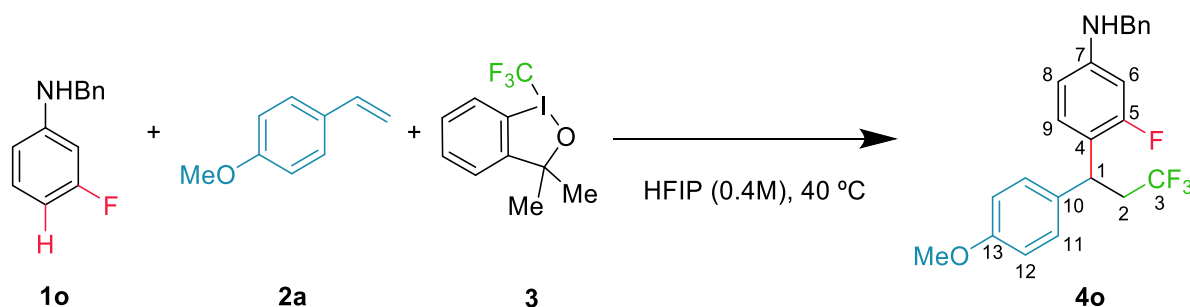

From aniline **1o** (40.2 mg, 0.2 mmol), alkene **2a** (26.8 mg, 0.2 mmol) and trifluoromethyl reagent **3** (66.0 mg, 0.2 mmol), in 0.5 mL of HFIP, following the general procedure, aniline **4o** was obtained. Chromatographic purification (gradient elution: 4:96 Et<sub>2</sub>O – toluene) gave **4o** (64.4 mg, 80%), as a colourless oil.

Data for **4o**: *R<sub>f</sub>* 0.50 (4% Et<sub>2</sub>O – toluene). <sup>1</sup>H NMR (400 MHz, CDCl<sub>3</sub>) δ 7.38 – 7.26 (5H, m, Ar), 7.19 (2H, d, *J* = 8.7 Hz, 11-H), 6.98 (1H, t, *J* = 8.5 Hz, 9-H), 6.84 (2H, d, *J* = 8.7 Hz, 12-H), 6.37 (1H, dd, *J* = 8.4 and 2.4 Hz, 8-H), 6.30 (1H, dd, *J* = 12.9 and 2.4 Hz, 6-H), 4.44 (1H, t, *J* = 7.5 Hz, 1-H), 4.27 (2H, s, CH<sub>2</sub> Bn), 3.78 (3H, s, OMe), 2.96 – 2.73 (2H, m, 2-H<sub>2</sub>). <sup>13</sup>C NMR (101 MHz, CDCl<sub>3</sub>) δ 161.3 (1C, d, *J* = 243.6 Hz, C-5), 158.3 (1C, C Ar), 148.6 (1C, d, *J* = 11.1 Hz, C-7), 138.8 (1C, C Ar), 134.6 (1C, C Ar), 129.2 (1C, d, *J* = 6.4 Hz, C-9), 128.8 (2C, CH Ar), 128.5 (2C, CH Ar), 127.6 (2C, CH Ar), 127.5 (1C, CH Ar), 126.6 (1C, q, *J* = 277.8 Hz, CF<sub>3</sub>), 118.6 (1C, d, *J* = 14.6 Hz, C-4), 114.0 (2C, CH Ar), 109.0 (1C, C-8), 100.1 (1C, d, *J* = 26.7 Hz, C-6), 55.3 (1C, OMe), 48.4 (1C, CH<sub>2</sub> Bn), 38.9 (1C, q, *J* = 27.1 Hz, C-2), 37.6 (1C, C-1). <sup>19</sup>F NMR (376 MHz, CDCl<sub>3</sub>) δ –64.1 (3F, CF<sub>3</sub>), –116.6 (1F, C5-F). HRMS (ESI): calculated for C<sub>23</sub>H<sub>22</sub>F<sub>4</sub>NO [M+H]<sup>+</sup> *m/z* requires 404.1632, found *m/z* 404.1615.

### *N*-Benzyl-3-chloro-4-[3,3,3-trifluoro-1-(4-methoxyphenyl)propyl]aniline, **4p**.

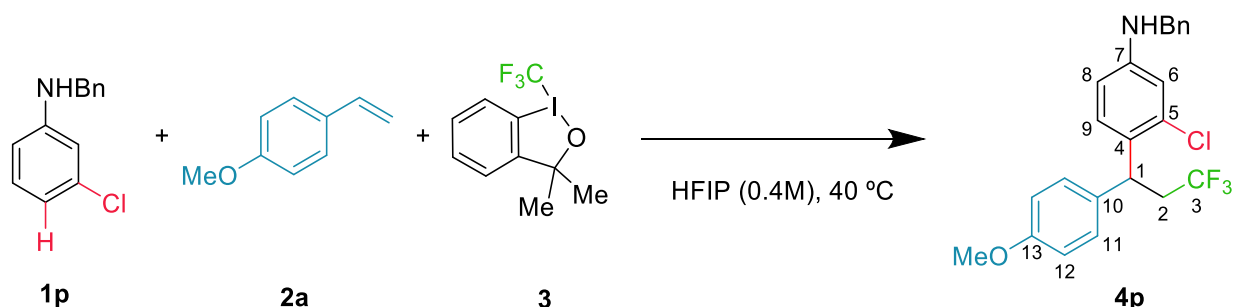

From aniline **1p** (43.5 mg, 0.2 mmol), alkene **2a** (26.8 mg, 0.2 mmol) and trifluoromethyl reagent **3** (66.0 mg, 0.2 mmol), in 0.5 mL of HFIP, following the general procedure, aniline **4p** was obtained. Chromatographic purification (gradient elution: 5:95 → 15:85 Et<sub>2</sub>O – hexane) gave **4p** (40.8 mg, 50%), as a colourless oil.

Data for **4p**: *R<sub>f</sub>* 0.20 (30% Et<sub>2</sub>O – hexane). <sup>1</sup>H NMR (400 MHz, CDCl<sub>3</sub>) δ 7.41 – 7.26 (5H, m, Ar), 7.20 (2H, d, *J* = 8.6 Hz, 11-H), 7.03 (1H, d, *J* = 8.5 Hz, 9-H), 6.85 (2H, d, *J* = 8.7 Hz, 12-H),

6.66 (1H, d,  $J = 2.5$  Hz, 6-H), 6.51 (1H, dd,  $J = 8.5$  and  $2.5$  Hz, 8-H), 4.77 (1H, t,  $J = 7.4$  Hz, 1-H), 4.28 (2H, s, CH<sub>2</sub> Bn), 3.78 (3H, s, OMe), 2.81 (2H, qd,  $J = 10.4$  and  $7.7$  Hz, 2-H<sub>2</sub>). <sup>13</sup>C NMR (101 MHz, CDCl<sub>3</sub>) δ 158.3 (1C, C Ar), 147.6 (1C, C Ar), 138.7 (1C, C Ar), 134.2 (1C, C Ar), 134.2 (1C, C Ar), 129.1 (1C, C Ar), 128.8 (2C, CH Ar), 128.8 (2C, CH Ar), 128.7 (1C, C-9), 127.6 (2C, CH Ar), 127.5 (1C, CH Ar), 126.5 (1C, q,  $J = 278.0$  Hz, CF<sub>3</sub>), 114.0 (2C, CH Ar), 113.6 (1C, C-6), 112.0 (1C, C-8), 55.3 (1C, OMe), 48.3 (1C, CH<sub>2</sub> Bn), 39.4 (1C, C-1), 39.2 (1C, q,  $J = 27.2$  Hz, C-2). <sup>19</sup>F NMR (376 MHz, CDCl<sub>3</sub>) δ -63.7 (3F, CF<sub>3</sub>). HRMS (ESI): calculated for C<sub>23</sub>H<sub>22</sub>ClF<sub>3</sub>NO [M+H]<sup>+</sup> requires  $m/z$  420.1337, found  $m/z$  420.1316.

***N*-Benzyl-3-bromo-4-[3,3,3-trifluoro-1-(4-methoxyphenyl)propyl]aniline, 4q.**

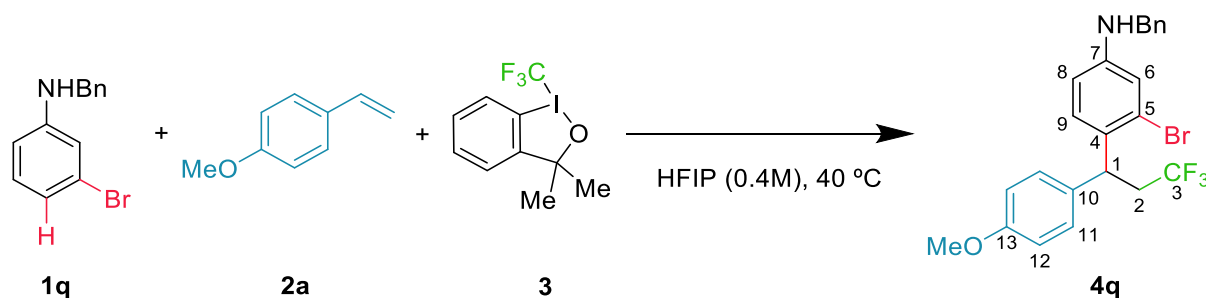

From aniline **1q** (52.4 mg, 0.2 mmol), alkene **2a** (26.8 mg, 0.2 mmol) and trifluoromethyl reagent **3** (66.0 mg, 0.2 mmol), in 0.5 mL of HFIP, following the general procedure, aniline **4q** was obtained. Chromatographic purification (gradient elution: 10:90 → 20:80 Et<sub>2</sub>O – hexane) gave **4q** (54.7 mg, 60%), as a colourless oil.

Data for **4q**:  $R_f$  0.40 (30% Et<sub>2</sub>O – hexane). <sup>1</sup>H NMR (400 MHz, CDCl<sub>3</sub>) δ 7.42 – 7.27 (5H, m, Ar), 7.22 (2H, d,  $J = 8.6$  Hz, 12-H), 7.03 (1H, d,  $J = 8.5$  Hz, 9-H), 6.86 (2H, d,  $J = 8.4$  Hz, 11-H), 6.85 (1H, d,  $J = 3.6$  Hz, 6-H), 6.55 (1H, dd,  $J = 8.6$  and  $2.5$  Hz, 8-H), 4.78 (1H, t,  $J = 7.3$  Hz, 1-H), 4.27 (2H, s, CH<sub>2</sub> Bn), 4.13 (1H, br s, NH), 3.79 (3H, s, OMe), 2.81 (2H, qd,  $J = 10.2$  and  $7.9$  Hz, 2-H<sub>2</sub>). <sup>13</sup>C NMR (101 MHz, CDCl<sub>3</sub>) δ 158.3 (1C, C Ar), 147.7 (1C, C Ar), 138.7 (1C, C Ar), 134.2 (1C, C Ar), 130.6 (1C, C Ar), 128.8 (5C, CH Ar), 128.7 (1C, CH Ar), 127.6 (2C, CH Ar), 126.4 (1C, q,  $J = 280.5$  Hz, CF<sub>3</sub>), 125.0 (1C, C Ar), 116.8 (1C, C-6), 114.0 (2C, CH Ar), 112.6 (1C, C-8), 55.3 (1C, OMe), 48.3 (1C, CH<sub>2</sub> Bn), 41.8 (1C, C-1), 39.4 (1C, q,  $J = 27.2$  Hz, C-2). <sup>19</sup>F NMR (376 MHz, CDCl<sub>3</sub>) δ -63.6 (3F, CF<sub>3</sub>). HRMS (EI): calculated for C<sub>23</sub>H<sub>21</sub>BrF<sub>3</sub>NO [M]<sup>+</sup> requires 463.0754  $m/z$ , found 463.0737  $m/z$ .

### *N*-Benzyl-2,5-dimethyl-4-[3,3,3-trifluoro-1-(4-methoxyphenyl)propyl]aniline, **4r**.

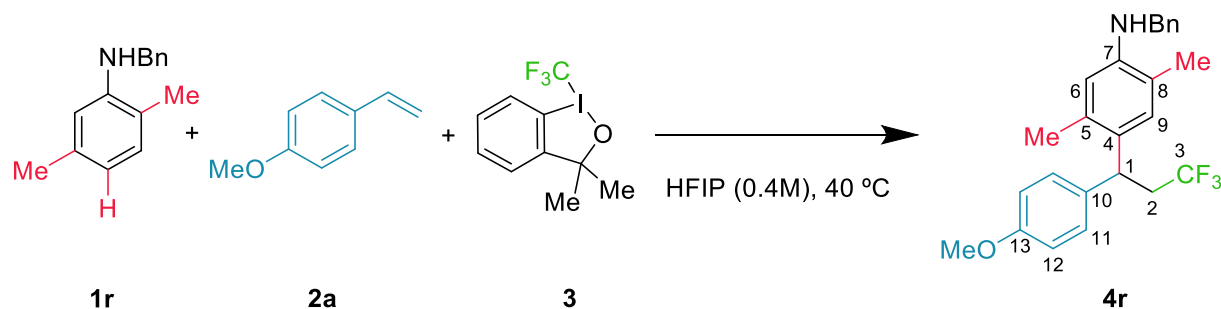

From aniline **1r** (42.0 mg, 0.2 mmol), alkene **2a** (26.8 mg, 0.2 mmol) and trifluoromethyl reagent **3** (66.0 mg, 0.2 mmol), in 0.5 mL of HFIP, following the general procedure, aniline **4r** was obtained. Chromatographic purification (gradient elution: 0:100 → 20:80 Et<sub>2</sub>O – hexane) gave **4r** (47.9 mg, 58%), as a white foam.

Data for **4r**: *R<sub>f</sub>* 0.30 (30% Et<sub>2</sub>O – hexane). <sup>1</sup>H NMR (400 MHz, CDCl<sub>3</sub>) δ 7.42 – 7.26 (5H, m, Ar), 7.15 (2H, d, *J* = 8.6 Hz, 11-H), 6.92 (1H, s, 9-H), 6.82 (2H, d, *J* = 8.7 Hz, 12-H), 6.47 (1H, s, 6-H), 4.41 (1H, t, *J* = 7.2 Hz, 1-H), 4.33 (2H, s, CH<sub>2</sub> Bn), 3.78 (3H, s, OMe), 2.93 – 2.71 (2H, m, 2-H<sub>2</sub>), 2.25 (3H, s, Me), 2.14 (3H, s, Me). <sup>13</sup>C NMR (101 MHz, CDCl<sub>3</sub>) δ 158.1 (1C, C Ar), 144.1 (1C, C Ar), 139.2 (1C, C Ar), 135.3 (1C, C Ar), 134.3 (1C, C Ar), 130.0 (1C, C Ar), 128.8 (2C, CH Ar), 128.7 (2C, CH Ar), 128.6 (1C, CH Ar), 128.2 (1C, C-9), 127.9 (1C, CH Ar), 127.5 (1C, CH Ar), 126.8 (1C, q, *J* = 277.8 Hz, CF<sub>3</sub>), 120.1 (1C, C Ar) 113.9 (2C, CH Ar), 112.9 (1C, C-6), 55.3 (1C, OMe), 48.8 (1C, CH<sub>2</sub> Bn), 40.1 (1C, q, *J* = 26.8 Hz, C-2), 39.1 (1C, C-1), 19.8 (1C, Me), 17.5 (1C, Me). <sup>19</sup>F NMR (376 MHz, CDCl<sub>3</sub>) δ –63.7 (3F, CF<sub>3</sub>). HRMS (ESI): calculated for C<sub>25</sub>H<sub>27</sub>F<sub>3</sub>NO [M+H]<sup>+</sup> requires *m/z* 414.2039, found *m/z* 414.2048.

### *N*-Benzyl-5-chloro-2-methoxy-4-[3,3,3-trifluoro-1-(4-methoxyphenyl)propyl]aniline, **4s**.

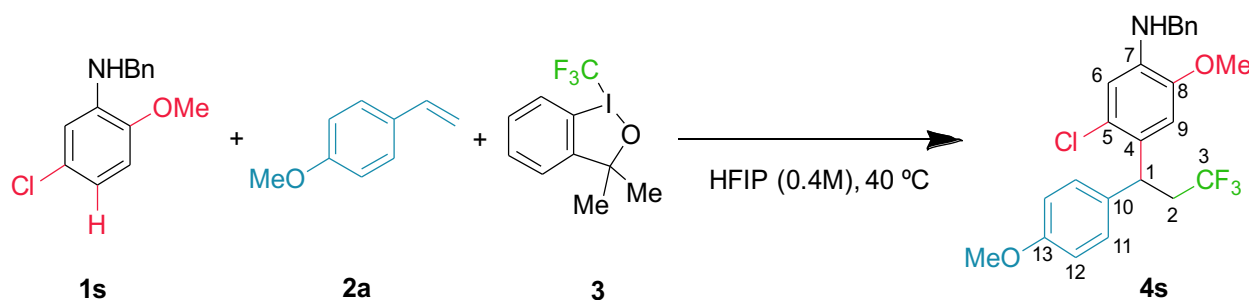

From aniline **1s** (49.1 mg, 0.2 mmol), alkene **2a** (26.8 mg, 0.2 mmol) and trifluoromethyl reagent **3** (66.0 mg, 0.2 mmol), in 0.5 mL of HFIP, following the general procedure, aniline **4s** was obtained. Chromatographic purification (gradient elution: 5:95 → 10:90 Et<sub>2</sub>O – hexane) gave **4s** (52.0 mg, 58%), as a colourless oil.

Data for **4s**: *R<sub>f</sub>* 0.20 (30% Et<sub>2</sub>O – hexane). <sup>1</sup>H NMR (400 MHz, CDCl<sub>3</sub>) δ 7.38 – 7.25 (5H, m, Ar), 7.20 (2H, d, *J* = 8.6 Hz, 11-H), 6.85 (2H, d, *J* = 8.7 Hz, 12-H), 6.57 (1H, s, Ar), 6.56 (1H, s, Ar), 4.78 (1H, t, *J* = 7.4 Hz, 1-H), 4.28 (2H, s, CH<sub>2</sub> Bn), 3.78 (3H, s, OMe), 3.78 (3H, s, OMe), 2.90

– 2.76 (2H, m, 2-H<sub>2</sub>). <sup>13</sup>C NMR (101 MHz, CDCl<sub>3</sub>) δ 158.4 (1C, C Ar), 146.0 (1C, C Ar), 138.6 (1C, C Ar), 137.4 (1C, C Ar), 134.1 (1C, C Ar), 129.9 (1C, C Ar) 128.8 (2C, CH Ar), 128.7 (2C, CH Ar), 127.7 (2C, CH Ar), 127.5 (1C, CH Ar), 126.5 (1C, q, *J* = 278.2 Hz, CF<sub>3</sub>), 125.4 (1C, C Ar), 114.0 (2C, CH Ar), 111.1 (1C, CH Ar), 109.0 (1C, CH Ar), 55.7 (1C, OMe), 55.3 (1C, OMe), 48.1 (1C, CH<sub>2</sub> Bn), 39.8 (1C, C-1), 39.1 (1C, q, *J* = 27.3 Hz, C-2). <sup>19</sup>F NMR (376 MHz, CDCl<sub>3</sub>) δ –63.7 (3F, CF<sub>3</sub>). HRMS (ESI): calculated for C<sub>24</sub>H<sub>24</sub>ClF<sub>3</sub>NO<sub>2</sub> [M+H]<sup>+</sup> *m/z* requires 450.1443, found *m/z* 450.1437.

***N*-Benzyl-3-fluoro-2-methyl-4-[3,3,3-trifluoro-1-(4-methoxyphenyl)propyl]aniline, 4t.**

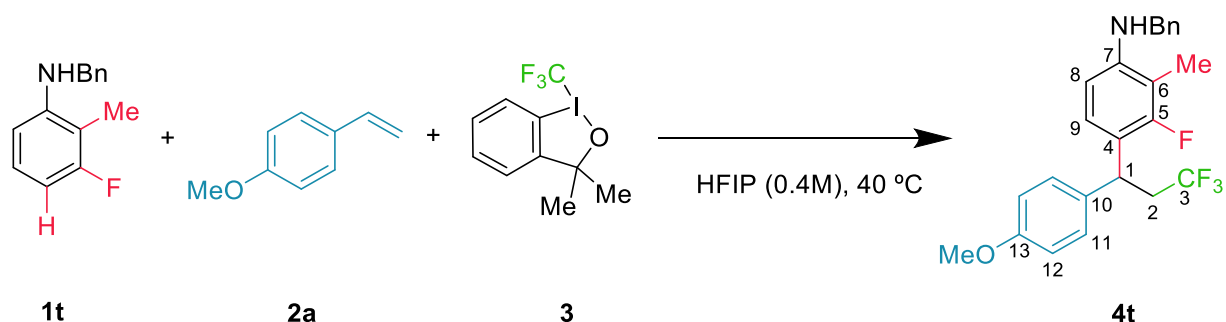

From aniline **1t** (43.0 mg, 0.2 mmol), alkene **2a** (26.8 mg, 0.2 mmol) and trifluoromethyl reagent **3** (66.0 mg, 0.2 mmol), in 0.5 mL of HFIP, following the general procedure, aniline **4t** was obtained. Chromatographic purification (gradient elution: 5:95 → 10:90 Et<sub>2</sub>O – hexane) gave **4t** (52.7 mg, 64%), as a colourless oil.

Data for **4t**: *R<sub>f</sub>* 0.30 (30% Et<sub>2</sub>O – hexane). <sup>1</sup>H NMR (400 MHz, CDCl<sub>3</sub>) δ 7.39 – 7.26 (5H, m, Ar), 7.20 (2H, d, *J* = 8.6 Hz, 11-H), 6.93 (1H, t, *J* = 8.4 Hz, 9-H), 6.84 (2H, d, *J* = 8.7 Hz, 12-H), 6.41 (1H, d, *J* = 8.4 Hz, 8-H), 4.49 (1H, t, *J* = 7.4 Hz, 1-H), 4.35 (2H, s, CH<sub>2</sub> Bn), 3.78 (3H, s, OMe), 2.98 – 2.74 (2H, m, 2-H<sub>2</sub>), 2.05 (3H, s, Me). <sup>13</sup>C NMR (101 MHz, CDCl<sub>3</sub>) δ 158.8 (1C, d, *J* = 241.6 Hz, C-5), 158.3 (1C, C Ar), 146.3 (1C, C Ar), 139.0 (1C, C Ar), 134.7 (1C, C Ar), 128.8 (2C, CH Ar), 128.6 (2C, CH Ar), 127.6 (2C, CH Ar), 127.5 (1C, CH Ar), 126.6 (1C, q, *J* = 277.7 Hz, CF<sub>3</sub>), 125.9 (1C, d, *J* = 6.5 Hz, C-9), 119.0 (1C, d, *J* = 14.3 Hz, C-4), 114.0 (2C, CH Ar), 109.3 (1C, d, *J* = 18.9 Hz, C-6), 105.9 (1C, C-8), 55.3 (1C, OMe), 48.7 (1C, CH<sub>2</sub> Bn), 38.9 (1C, q, *J* = 27.1 Hz, C-2), 37.8 (1C, quint, *J* = 2.7 Hz, C-1), 8.6 (1C, d, *J* = 7.3 Hz, Me). <sup>19</sup>F NMR (376 MHz, CDCl<sub>3</sub>) δ –64.0 (3F, CF<sub>3</sub>), –121.3 (1F, C5-F). HRMS (ESI): calculated for C<sub>24</sub>H<sub>24</sub>F<sub>4</sub>NO [M+H]<sup>+</sup> *m/z* requires 418.1789, found *m/z* 418.1778.



***N*-Benzyl-4-[3,3,3-trifluoro-1-(4-methoxyphenyl)propyl]-5,6,7,8-tetrahydronaphthalen-1-amine, 4u.**

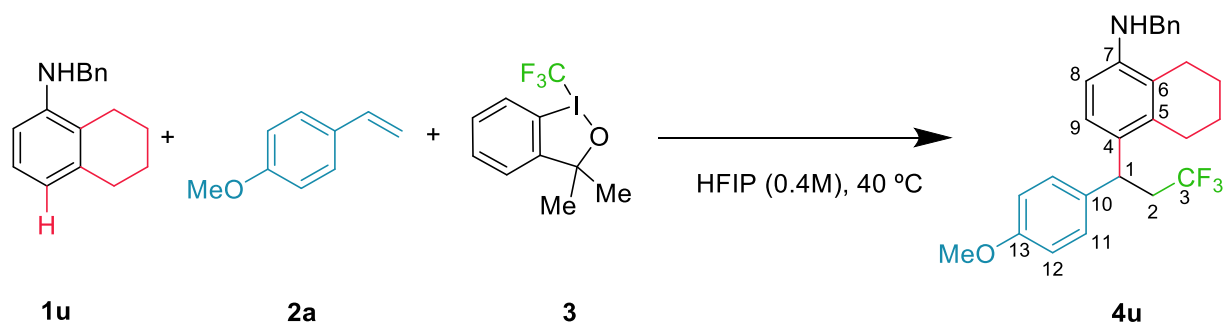

From aniline **1u** (47.2 mg, 0.2 mmol), alkene **2a** (26.8 mg, 0.2 mmol) and trifluoromethyl reagent **3** (66.0 mg, 0.2 mmol), in 0.5 mL of HFIP, following the general procedure, aniline **4u** was obtained. Chromatographic purification (gradient elution: 5:95  $\rightarrow$  15:85 Et<sub>2</sub>O – hexane) gave **4u** (26.9 mg, 31%), as brownish oil.

Data for **4u**: *R<sub>f</sub>* 0.30 (30% Et<sub>2</sub>O – hexane). <sup>1</sup>H NMR (400 MHz, CDCl<sub>3</sub>) δ 7.44 – 7.27 (m, 5H), 7.15 (2H, d, *J* = 8.6 Hz, 11-H), 7.04 (1H, d, *J* = 8.4 Hz, 9-H), 6.81 (2H, d, *J* = 8.7 Hz, 12-H), 6.56 (1H, d, *J* = 8.4 Hz, 8-H), 4.46 (1H, t, *J* = 7.2 Hz, 1-H), 4.36 (2H, s, CH<sub>2</sub> Bn), 3.78 (3H, s, OMe), 2.90 – 2.70 (3H, m, 2-H<sub>2</sub> and CH<sub>2</sub> tetrahydronaphth), 2.57 (1H, dt, *J* = 16.4 and 6.0 Hz, CH<sub>2</sub> tetrahydronaphth), 2.51 – 2.37 (2H, m, CH<sub>2</sub> tetrahydronaphth), 1.89 – 1.67 (4H, m, 2 x CH<sub>2</sub> tetrahydronaphth). <sup>13</sup>C NMR (101 MHz, CDCl<sub>3</sub>) δ 158.1 (1C, C Ar), 144.3 (1C, C Ar), 139.5 (1C, C Ar), 135.4 (1C, C Ar), 135.2 (1C, C Ar), 130.3 (1C, C Ar), 129.1 (2C, C-11), 128.8 (2C, CH Ar), 128.20 (1C, q, *J* = 277.2 Hz, CF<sub>3</sub>), 127.8 (2C, CH Ar), 127.4 (1C, CH Ar), 124.3 (1C, C-9), 122.1 (1C, C Ar), 113.9 (2C, C-12), 107.5 (1C, C-8), 55.3 (1C, OMe), 48.7 (1C, CH<sub>2</sub> Bn), 40.58 (1C, q, *J* = 26.6 Hz, C-2), 38.58 (1C, q, *J* = 2.6 Hz, C-1), 26.8 (1C, CH<sub>2</sub> tetrahydronaphth), 24.8 (1C, CH<sub>2</sub> tetrahydronaphth), 22.9 (1C, CH<sub>2</sub> tetrahydronaphth), 22.4 (1C, CH<sub>2</sub> tetrahydronaphth). <sup>19</sup>F NMR (376 MHz, CDCl<sub>3</sub>) δ –63.6 (3F, CF<sub>3</sub>). HRMS (ESI): calculated for C<sub>27</sub>H<sub>29</sub>F<sub>3</sub>NO [M+H]<sup>+</sup> *m/z* requires 440.2196, found *m/z* 440.2190.

**4-{1-[4-(Benzylamino)phenyl]-3,3,3-trifluoropropyl}phenol, 4v.**

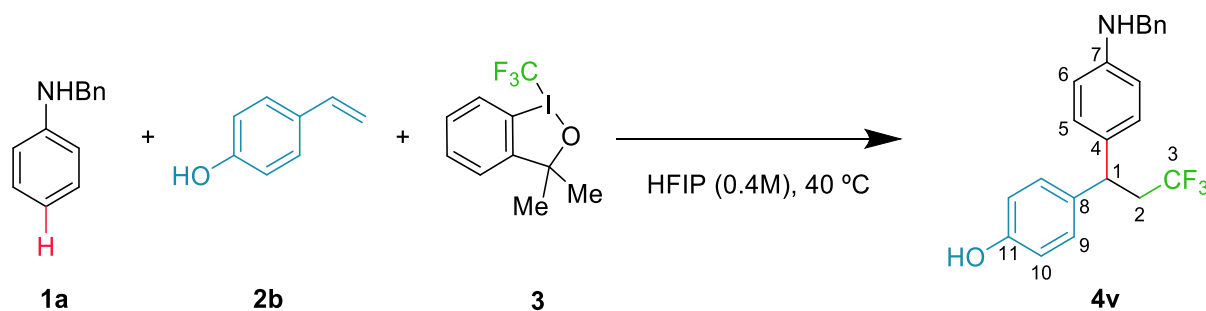

From aniline **1a** (36.7 mg, 0.2 mmol), alkene **2b** (24.0 mg, 0.2 mmol) and trifluoromethyl reagent **3** (66.0 mg, 0.2 mmol), in 0.5 mL of HFIP, following the general procedure, aniline **4v** was

obtained. Chromatographic purification (gradient elution: 30:70 → 50:50 Et<sub>2</sub>O – hexane) gave **4v** (41.1 mg, 55%), as a colourless oil.

Data for **4v**: *R<sub>f</sub>* 0.20 (50% Et<sub>2</sub>O – hexane). <sup>1</sup>H NMR (400 MHz, CDCl<sub>3</sub>) δ 7.38 – 7.26 (5H, m, Ar), 7.09 (2H, d, *J* = 8.5 Hz, 9-H), 7.03 (2H, d, *J* = 8.5 Hz, 5-H), 6.73 (2H, d, *J* = 8.6 Hz, 10-H), 6.60 (2H, d, *J* = 8.5 Hz, 6-H), 4.30 (2H, s, CH<sub>2</sub> Bn), 4.18 (1H, t, *J* = 7.4 Hz, 1-H), 2.80 (2H, qd, *J* = 10.5 and 7.4 Hz, 2-H<sub>2</sub>). <sup>13</sup>C NMR (101 MHz, CDCl<sub>3</sub>) δ 154.2 (1C, C Ar), 146.6 (1C, C Ar), 139.2 (1C, C Ar), 135.9 (1C, C Ar), 132.6 (1C, C Ar), 128.7 (2C, CH Ar), 128.7 (2C, CH Ar), 128.3 (2C, CH Ar), 127.7 (2C, CH Ar), 127.4 (1C, CH Ar), 126.6 (1C, q, *J* = 277.8 Hz, CF<sub>3</sub>), 115.5 (2C, CH Ar), 113.4 (2C, CH Ar), 48.7 (1C, CH<sub>2</sub> Bn), 43.5 (1C, C-1), 40.0 (1C, q, *J* = 26.9 Hz, C-2). <sup>19</sup>F NMR (376 MHz, CDCl<sub>3</sub>) δ –63.5 (3F, CF<sub>3</sub>). HRMS (ESI): calculated for C<sub>22</sub>H<sub>21</sub>F<sub>3</sub>NO [M+H]<sup>+</sup> *m/z* requires 372.1570, found *m/z* 372.1563.

#### 4-{1-[4-(Benzylamino)phenyl]-3,3,3-trifluoropropyl}-2,6-dibromophenol, **4w**.

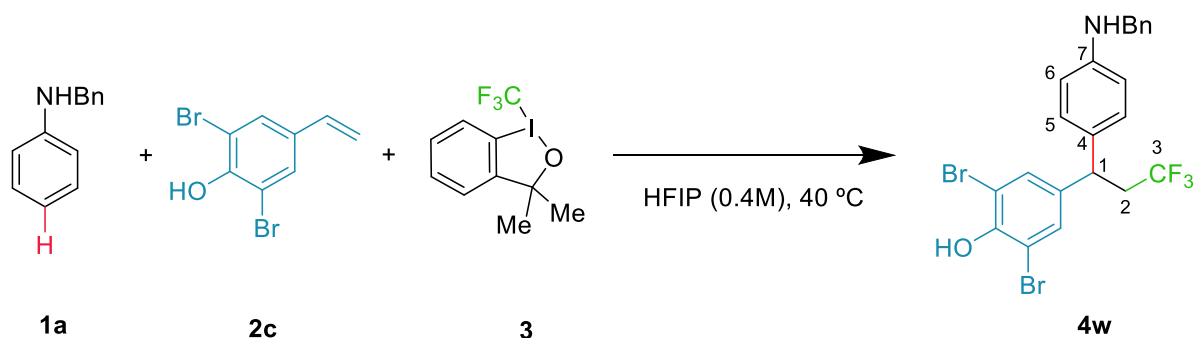

From aniline **1a** (36.7 mg, 0.2 mmol), alkene **2c** (55.6 mg, 0.2 mmol) and trifluoromethyl reagent **3** (66.0 mg, 0.2 mmol), in 0.5 mL of HFIP, following the general procedure, aniline **4w** was obtained. Chromatographic purification (gradient elution: 15:80 → 55:45 Et<sub>2</sub>O – hexane) gave **4w** (78.4 mg, 74%), as a colourless oil.

Data for **4w**: *R<sub>f</sub>* 0.20 (30% Et<sub>2</sub>O – hexane). <sup>1</sup>H NMR (400 MHz, CDCl<sub>3</sub>) δ 7.41 – 7.24 (7H, m, Ar), 7.00 (2H, d, *J* = 8.5 Hz, Ar), 6.60 (2H, d, *J* = 8.6 Hz, Ar), 4.31 (2H, s, CH<sub>2</sub> Bn), 4.12 (1H, t, *J* = 7.4 Hz, 1-H), 2.78 (2H, m, 2-H<sub>2</sub>). <sup>13</sup>C NMR (101 MHz, CDCl<sub>3</sub>) δ 148.2 (1C, C Ar), 147.3 (1C, C Ar), 139.3 (1C, C Ar), 138.4 (1C, C Ar), 131.0 (2C, CH Ar), 130.6 (1C, C Ar), 128.8 (2C, CH Ar), 128.2 (2C, CH Ar), 127.6 (2C, CH Ar), 127.5 (1C, CH Ar), 126.3 (1C, q, *J* = 277.8 Hz, CF<sub>3</sub>), 113.3 (2C, CH Ar), 110.0 (2C, C Ar), 48.5 (1C, CH<sub>2</sub> Bn), 43.1 (1C, C-1), 39.7 (1C, q, *J* = 27.3 Hz, C-2). <sup>19</sup>F NMR (376 MHz, CDCl<sub>3</sub>) δ –63.6 (3F, CF<sub>3</sub>). HRMS (EI): calculated for C<sub>22</sub>H<sub>16</sub>Br<sub>2</sub>F<sub>3</sub>NO [M]<sup>+</sup> requires *m/z* 526.9532, found *m/z* 526.9520.

### *N*-Benzyl-4-{3,3,3-trifluoro-1-[4-(methylthio)phenyl]propyl}aniline, **4x**.

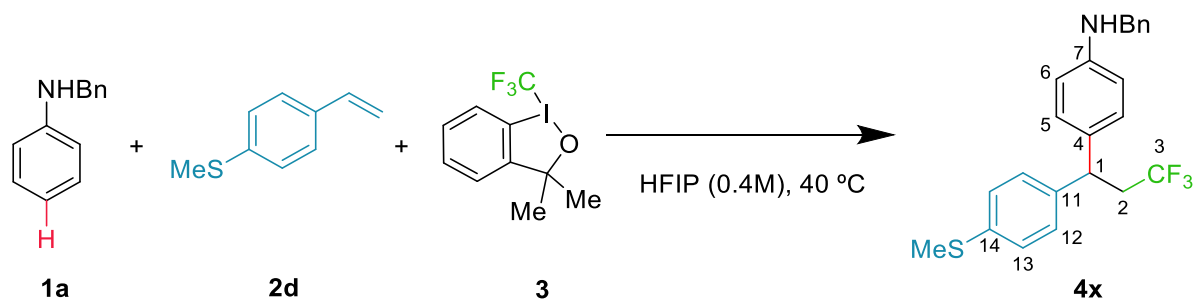

From aniline **1a** (36.7 mg, 0.2 mmol), alkene **2d** (30.0 mg, 0.2 mmol) and trifluoromethyl reagent **3** (66.0 mg, 0.2 mmol), in 0.5 mL of HFIP, following the general procedure, aniline **4x** was obtained. Chromatographic purification (gradient elution: 0:100 → 10:90 Et<sub>2</sub>O – hexane) gave **4x** (46.2 mg, 60%), as a colourless oil.

Data for **4x**: *R*<sub>f</sub> 0.40 (30% Et<sub>2</sub>O – hexane). <sup>1</sup>H NMR (400 MHz, CDCl<sub>3</sub>) δ 7.43 – 7.27 (5H, m, Ar), 7.21 (2H, d, *J* = 8.5 Hz, 13-H), 7.17 (2H, d, *J* = 8.5 Hz, 12-H), 7.04 (2H, d, *J* = 8.5 Hz, 5-H), 6.59 (2H, d, *J* = 8.5 Hz, 6-H), 4.30 (2H, s, CH<sub>2</sub> Bn), 4.21 (1H, t, *J* = 7.4 Hz, 1-H), 4.01 (1H, s, NH), 2.84 (2H, qd, *J* = 10.5 and 7.5 Hz, 2-H<sub>2</sub>), 2.46 (3H, s, SMe). <sup>13</sup>C NMR (101 MHz, CDCl<sub>3</sub>) δ 147.0 (1C, C Ar), 140.6 (1C, C Ar), 139.4 (1C, C Ar), 136.5 (1C, C Ar), 131.7 (1C, C Ar), 128.7 (2C, CH Ar), 128.3 (2C, CH Ar), 128.0 (2C, CH Ar), 127.6 (2C, CH Ar), 127.3 (1C, CH Ar), 127.1 (2C, CH Ar), 126.6 (1C, q, *J* = 277.7 Hz, CF<sub>3</sub>), 113.1 (2C, CH Ar), 48.5 (1C, CH<sub>2</sub> Bn), 43.8 (1C, C-1), 39.7 (1C, q, *J* = 27.0 Hz, C-2), 16.0 (1C, SMe). <sup>19</sup>F NMR (376 MHz, CDCl<sub>3</sub>) δ –63.5 (3F, CF<sub>3</sub>). HRMS (EI): calculated for C<sub>23</sub>H<sub>22</sub>F<sub>3</sub>NS [M]<sup>+</sup> requires *m/z* 401.1420, found *m/z* 401.1281.

### *N*-Benzyl-4-[1-(2,3-dihydrobenzofuran-5-yl)-3,3,3-trifluoropropyl]aniline, **4y**.

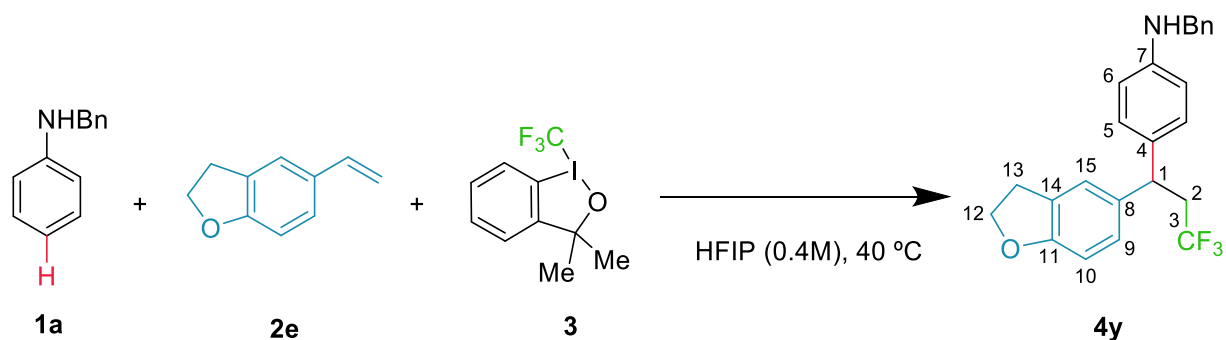

From aniline **1a** (36.7 mg, 0.2 mmol), alkene **2e** (29.2 mg, 0.2 mmol) and trifluoromethyl reagent **3** (66.0 mg, 0.2 mmol), in 0.5 mL of HFIP, following the general procedure, aniline **4y** was obtained. Chromatographic purification (gradient elution: 10:90 → 20:80 Et<sub>2</sub>O – hexane) gave **4y** (56.2 mg, 71%), as a colourless oil.

Data for **4y**: *R*<sub>f</sub> 0.20 (30% Et<sub>2</sub>O – hexane). <sup>1</sup>H NMR (400 MHz, CDCl<sub>3</sub>) δ 7.41 – 7.27 (5H, m, H Ar), 7.06 (2H, d, *J* = 8.3 Hz, 5-H), 7.06 (1H, s, 15-H), 7.00 (1H, d, *J* = 8.2 Hz, 9-H), 6.72 (1H, d, *J* = 8.2 Hz, 10-H), 6.61 (2H, d, *J* = 8.3 Hz, 6-H), 4.54 (2H, t, *J* = 8.7 Hz, 12-H<sub>2</sub>), 4.31 (2H, s, CH<sub>2</sub>

Bn), 4.19 (1H, t,  $J = 7.3$  Hz, 1-H), 3.15 (2H, t,  $J = 8.7$  Hz, 13-H<sub>2</sub>), 2.83 (2H, qd,  $J = 10.5$  and 7.1 Hz, 2-H<sub>2</sub>). <sup>13</sup>C NMR (101 MHz, CDCl<sub>3</sub>) δ 158.8 (1C, C Ar), 146.7 (1C, C Ar), 139.3 (1C, C Ar), 135.8 (1C, C Ar), 132.6 (1C, C Ar), 128.7 (2C, CH Ar), 128.2 (2C, CH Ar), 127.6 (2C, CH Ar), 127.4 (1C, C Ar), 127.4 (1C, CH Ar), 127.0 (1C, C-9), 126.7 (1C, q,  $J = 277.8$  Hz, CF<sub>3</sub>), 124.1 (1C, C-15), 113.2 (2C, C-6), 109.2 (1C, C-10), 71.3 (1C, C-12), 48.6 (1C, CH<sub>2</sub> Bn), 43.7 (1C, C-1), 40.1 (1C, q,  $J = 26.8$  Hz, C-2), 29.8 (1C, C-13). <sup>19</sup>F NMR (376 MHz, CDCl<sub>3</sub>) δ -65.5 (3F, CF<sub>3</sub>). HRMS (ESI): calculated for C<sub>24</sub>H<sub>23</sub>F<sub>3</sub>NO [M+H]<sup>+</sup> requires  $m/z$  398.1727, found  $m/z$  398.1714.

#### *N*-Benzyl-4-(3,3,3-trifluoro-1,1-diphenylpropyl)aniline, 4z.

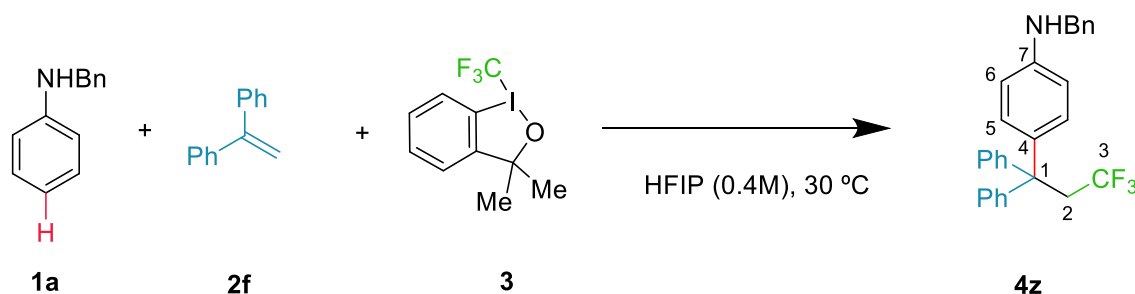

From aniline **1a** (36.7 mg, 0.2 mmol), alkene **2f** (36.1 mg, 0.2 mmol) and trifluoromethyl reagent **3** (66.0 mg, 0.2 mmol), in 0.5 mL of HFIP, following the general procedure at 30 °C, aniline **4z** was obtained. Chromatographic purification (gradient elution: 0:100 → 10:90 Et<sub>2</sub>O – hexane) gave **4z** (54.8 mg, 65%), as a colourless oil.

Data for **4z**:  $R_f$  0.30 (30% Et<sub>2</sub>O – hexane). <sup>1</sup>H NMR (400 MHz, CDCl<sub>3</sub>) δ 7.44 – 7.18 (15H, m, Ar), 7.10 (2H, d,  $J = 8.8$  Hz, 5-H), 6.58 (2H, d,  $J = 8.8$  Hz, 6-H), 4.32 (2H, s, CH<sub>2</sub> Bn), 4.03 (1H, br s, NH), 3.55 (2H, q,  $J = 10.6$  Hz, 2-H<sub>2</sub>). <sup>13</sup>C NMR (101 MHz, CDCl<sub>3</sub>) δ 146.5 (1C, C Ar), 146.0 (2C, C Ar), 139.4 (1C, C Ar), 134.2 (1C, C Ar), 130.0 (2C, CH Ar), 129.0 (4C, CH Ar), 128.7 (2C, CH Ar), 127.9 (4C, CH Ar), 127.7 (2C, CH Ar), 127.4 (1C, CH Ar), 126.3 (2C, CH Ar), 126.2 (1C, q,  $J = 279.4$  Hz, CF<sub>3</sub>), 112.2 (2C, CH Ar), 53.5 (1C, C-1), 48.5 (1C, CH<sub>2</sub> Bn), 44.2 (1C, q,  $J = 26.4$  Hz, C-2). <sup>19</sup>F NMR (376 MHz, CDCl<sub>3</sub>) δ -55.8 (3F, CF<sub>3</sub>). HRMS (EI): calculated for C<sub>28</sub>H<sub>24</sub>F<sub>3</sub>N [M]<sup>+</sup> requires  $m/z$  431.1856, found  $m/z$  431.1868.

#### *N*-Benzyl-4-[3,3,3-trifluoro-1-phenyl-1-(*p*-tolyl)propyl]aniline, 4aa.

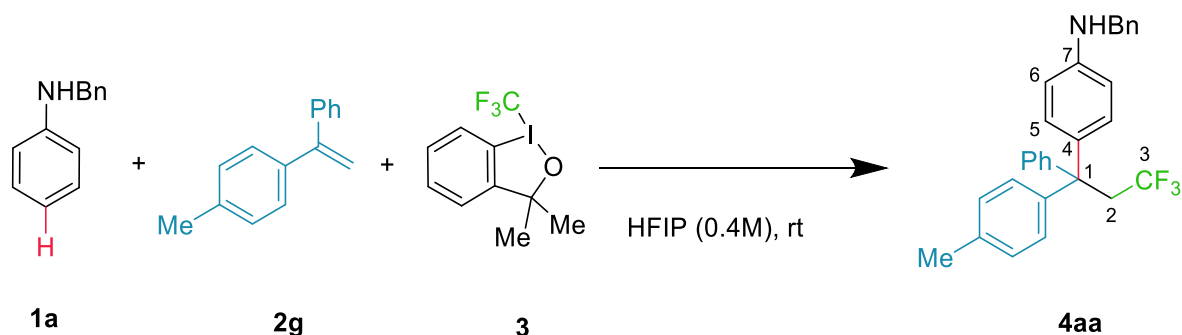

From aniline **1a** (36.1 mg, 0.2 mmol), alkene **2g** (38.9 mg, 0.2 mmol) and trifluoromethyl reagent **3** (66.0 mg, 0.2 mmol), in 0.5 mL of HFIP at room temperature, following the general procedure, aniline **4aa** was obtained. Chromatographic purification (gradient elution: 0:100 → 5:95 Et<sub>2</sub>O – hexane) gave **4aa** (52.3 mg, 60%), as a colourless oil.

Data for **4aa**: *R<sub>f</sub>* 0.5 (30% Et<sub>2</sub>O – hexane). <sup>1</sup>H NMR (400 MHz, CDCl<sub>3</sub>) δ 7.49 – 7.17 (12H, m, Ar), 7.11 (4H, d, *J* = 8.7 Hz, Ar), 6.59 (2H, d, *J* = 8.8 Hz, 6-H), 4.32 (2H, s, CH<sub>2</sub> Bn), 3.53 (2H, q, *J* = 10.6 Hz, 2-H<sub>2</sub>), 2.34 (3H, s, Me). <sup>13</sup>C NMR (101 MHz, CDCl<sub>3</sub>) δ 146.3 (1C, C Ar), 146.2 (1C, C Ar), 143.1 (1C, C Ar), 139.3 (1C, C Ar), 135.9 (1C, C Ar), 134.6 (1C, C Ar), 130.0 (2C, CH Ar), 129.0 (2C, CH Ar), 128.9 (2C, CH Ar), 128.8 (2C, CH Ar), 128.7 (2C, CH Ar), 127.9 (2C, CH Ar), 127.7 (2C, CH Ar), 127.5 (1C, CH Ar), 126.29 (1C, CH Ar), 126.26 (1C, q, *J* = 279.3 Hz, CF<sub>3</sub>), 112.4 (2C, CH Ar), 53.2 (1C, C-1), 48.7 (1C, CH<sub>2</sub> Bn), 44.3 (1C, q, *J* = 26.2 Hz, C-2), 21.0 (1C, Me). <sup>19</sup>F NMR (376 MHz, CDCl<sub>3</sub>) δ –55.8 (3F, CF<sub>3</sub>). HRMS (ESI): calculated for C<sub>28</sub>H<sub>23</sub>F<sub>4</sub>N [M]<sup>+</sup> requires *m/z* 449.1767, found *m/z* 449.1768.

#### *N*-Benzyl-4-[3,3,3-trifluoro-1-(4-fluorophenyl)-1-phenylpropyl]aniline, **4ab**.

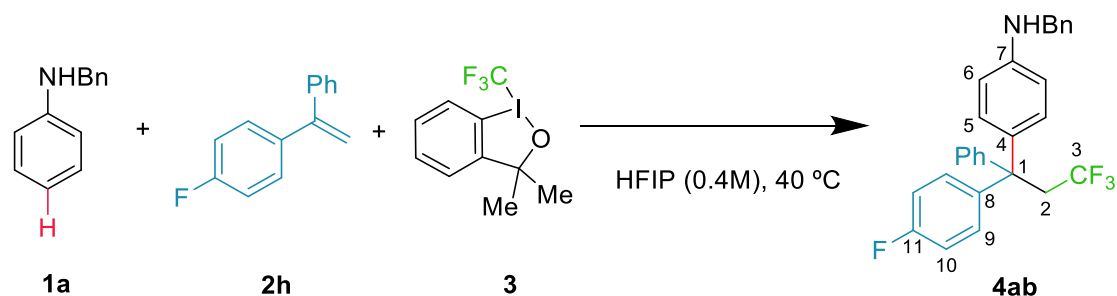

From aniline **1a** (36.7 mg, 0.2 mmol), alkene **2h** (39.6 mg, 0.2 mmol) and trifluoromethyl reagent **3** (66.0 mg, 0.2 mmol), in 0.5 mL of HFIP, following the general procedure, aniline **4ab** was obtained. Chromatographic purification (gradient elution: 0:100 → 6:94 Et<sub>2</sub>O – hexane) gave **4ab** (56.1 mg, 63%), as a colourless oil.

Data for **4ab**: *R<sub>f</sub>* 0.50 (30% Et<sub>2</sub>O – hexane). <sup>1</sup>H NMR (400 MHz, CDCl<sub>3</sub>) δ 7.42 – 7.19 (10H, m, H Ar), 7.33 (2H, dd, *J* = 31.1 and 4.0 Hz, 9-H), 7.07 (2H, d, *J* = 8.8 Hz, 5-H), 6.97 (2H, t, *J* = 8.7 Hz, 10-H), 6.57 (2H, d, *J* = 8.8 Hz, 6-H), 4.31 (2H, s, CH<sub>2</sub> Bn), 4.03 (1H, br s, NH), 3.51 (2H, q, *J* = 10.5 Hz, 2-H<sub>2</sub>). <sup>13</sup>C NMR (101 MHz, CDCl<sub>3</sub>) δ 161.3 (1C, d, *J* = 246.0 Hz, C-11), 146.6 (1C, C Ar), 146.0 (1C, C Ar), 141.5 (1C, d, *J* = 3.5 Hz, C-8), 139.3 (1C, C Ar), 134.1 (1C, C Ar), 130.8 (2C, d, *J* = 7.8 Hz, C-9), 129.7 (2C, CH Ar), 128.8 (2C, CH Ar), 128.0 (2C, CH Ar), 127.7 (2C, CH Ar), 127.4 (2C, CH Ar), 126.4 (2C, CH Ar), 123.3 (1C, d, *J* = 279.4 Hz, CF<sub>3</sub>), 114.6 (2C, d, *J* = 21.0 Hz, C-10), 112.3 (2C, CH Ar), 53.1 (1C, C-1), 48.5 (1C, CH<sub>2</sub> Bn), 44.3 (1C, q, *J* = 26.4 Hz, C-2). <sup>19</sup>F NMR (376 MHz, CDCl<sub>3</sub>) δ –55.9 (3F, CF<sub>3</sub>), –116.8 (1F, F Ar). HRMS (ESI): calculated for C<sub>29</sub>H<sub>27</sub>F<sub>3</sub>N [M+H]<sup>+</sup> requires *m/z* 446.2091, found *m/z* 446.2092.

### *N*-Benzyl-4-[1-(4-bromophenyl)-3,3,3-trifluoro-1-phenylpropyl]aniline, **4ac**.

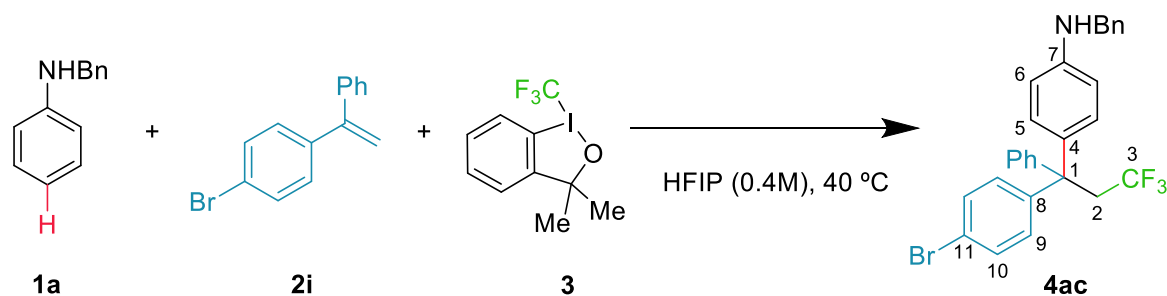

From aniline **1a** (36.7 mg, 0.2 mmol), alkene **2i** (51.8 mg, 0.2 mmol) and trifluoromethyl reagent **3** (66.0 mg, 0.2 mmol), in 0.5 mL of HFIP, following the general procedure, aniline **4ac** was obtained. Chromatographic purification (gradient elution: 5:95 → 20:80 Et<sub>2</sub>O – hexane) gave **4ac** (62.7 mg, 62%), as a colourless oil.

Data for **4ac**: *R<sub>f</sub>* 0.5 (30% Et<sub>2</sub>O – hexane). <sup>1</sup>H NMR (400 MHz, CDCl<sub>3</sub>) δ 7.28 (2H, d, *J* = 8.8 Hz, 10-H), 7.27 – 7.09 (10H, m, Ar), 7.08 (2H, d, *J* = 8.8 Hz, 9-H), 6.93 (2H, d, *J* = 8.8 Hz, 5-H), 6.45 (2H, d, *J* = 8.8 Hz, 6-H), 4.19 (2H, s, CH<sub>2</sub> Bn), 3.91 (1H, s, NH), 3.37 (2H, q, *J* = 10.5 Hz, 2-H<sub>2</sub>). <sup>13</sup>C NMR (101 MHz, CDCl<sub>3</sub>) δ 146.7 (1C, C Ar), 145.5 (1C, C Ar), 145.0 (1C, C Ar), 139.3 (1C, C Ar), 133.6 (1C, C Ar), 131.0 (2C, CH Ar), 130.9 (2C, CH Ar), 129.8 (2C, CH Ar), 128.8 (2C, CH Ar), 128.8 (2C, CH Ar), 128.1 (2C, CH Ar), 127.7 (2C, CH Ar), 127.4 (1C, CH Ar), 126.5 (1C, CH Ar), 126.0 (1C, q, *J* = 279.4 Hz, CF<sub>3</sub>), 120.4 (1C, C Ar), 112.3 (2C, CH Ar), 53.2 (1C, CH<sub>2</sub> Bn), 48.4 (1C, C-1), 44.1 (1C, q, *J* = 26.4 Hz, C-2). <sup>19</sup>F NMR (376 MHz, CDCl<sub>3</sub>) δ –55.9 (3F, CF<sub>3</sub>). HRMS (EI): calculated for C<sub>28</sub>H<sub>23</sub>BrF<sub>3</sub>N [M]<sup>+</sup> requires *m/z* 509.0961, found *m/z* 509.0952.

### *N*-Benzyl-4-[3,3,3-trifluoro-1-phenyl-1-(*m*-tolyl)propyl]aniline, **4ad**.

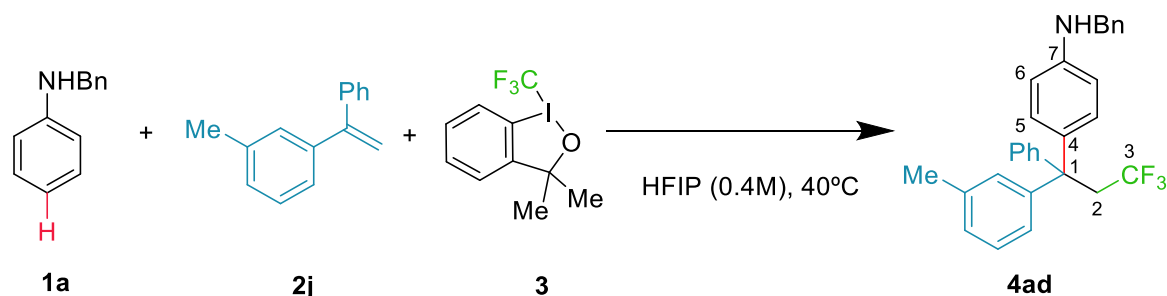

From aniline **1a** (36.7 mg, 0.2 mmol), alkene **2j** (38.9 mg, 0.2 mmol) and trifluoromethyl reagent **3** (66.0 mg, 0.2 mmol), in 0.5 mL of HFIP, following the general procedure, aniline **4ad** was obtained. Chromatographic purification (gradient elution: 4:96 → 15:85 Et<sub>2</sub>O – hexane) gave **4ad** (60.3 mg, 70%), as a colourless oil.

Data for **4ad**: *R<sub>f</sub>* 0.50 (30% Et<sub>2</sub>O – hexane). <sup>1</sup>H NMR (400 MHz, CDCl<sub>3</sub>) δ 7.41 – 7.24 (10H, m, Ar), 7.21 (1H, dt, *J* = 7.6 and 2.0 Hz, Ar), 7.16 (1H, t, *J* = 7.6, Hz, Ar), 7.11 (1H, s, *J* = 2.8 Hz, Ar), 7.08 (2H, d, *J* = 8.7 Hz, 5-H), 7.01 (1H, d, *J* = 7.2 Hz, Ar), 6.58 (2H, d, *J* = 8.7 Hz, 6-H), 4.30 (2H, s, CH<sub>2</sub> Bn), 3.51 (2H, q, *J* = 10.6 Hz, 2-H<sub>2</sub>), 2.30 (3H, s, Me). <sup>13</sup>C NMR (101 MHz, CDCl<sub>3</sub>) δ

146.17 (1C, C Ar), 146.11 (1C, C Ar), 146.0 (1C, C Ar), 139.2 (1C, C Ar), 137.4 (1C, C Ar), 134.6 (1C, C Ar), 130.1 (2C, CH Ar), 129.5 (1C, CH Ar), 129.1 (2C, CH Ar), 128.7 (2C, CH Ar), 127.9 (4C, CH Ar), 127.8 (1C, CH Ar), 127.5 (1C, CH Ar), 127.1 (1C, CH Ar), 126.3 (1C, CH Ar), 126.2 (1C, q,  $J = 279.4$  Hz, CF<sub>3</sub>), 126.1 (1C, CH Ar), 112.5 (2C, CH Ar), 53.5 (1C, C-1), 48.8 (1C, CH<sub>2</sub> Bn), 44.3 (1C, q,  $J = 26.2$  Hz, C-2), 21.8 (1C, Me). <sup>19</sup>F NMR (376 MHz, CDCl<sub>3</sub>) δ -55.9 (3F, CF<sub>3</sub>). HRMS (ESI): calculated for C<sub>29</sub>H<sub>27</sub>F<sub>3</sub>N [M+H]<sup>+</sup> requires  $m/z$  446.2091, found  $m/z$  446.2087.

***N*-Benzyl-4-[1-(3-bromophenyl)-3,3,3-trifluoro-1-phenylpropyl]aniline, 4ae.**

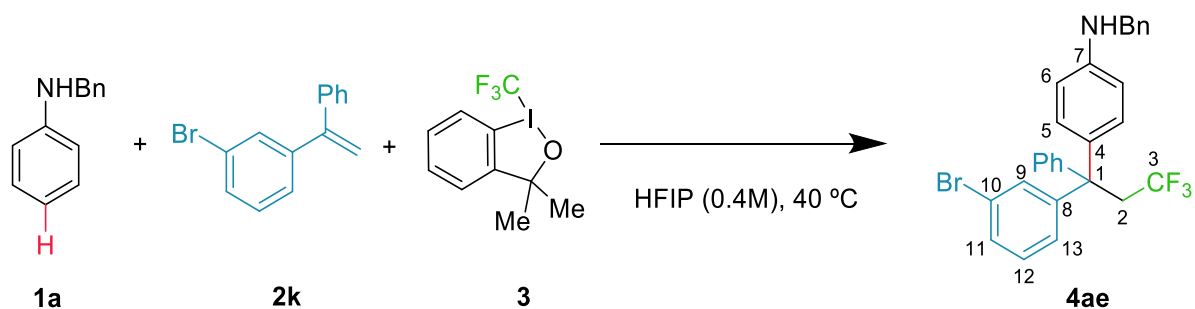

From aniline **1a** (36.7 mg, 0.2 mmol), alkene **2k** (51.8 mg, 0.2 mmol) and trifluoromethyl reagent **3** (66.0 mg, 0.2 mmol), in 0.5 mL of HFIP, following the general procedure, aniline **4ae** was obtained. Chromatographic purification (gradient elution: 5:95 → 15:85 Et<sub>2</sub>O – hexane) gave **4ae** (60.4 mg, 60%), as a colourless oil.

Data for **4ae**:  $R_f$  0.50 (30% Et<sub>2</sub>O – hexane). <sup>1</sup>H NMR (400 MHz, CDCl<sub>3</sub>) δ 7.47 (1H, s, 9-H), 7.42 – 7.18 (12H, m, Ar), 7.15 (1H, t,  $J = 7.9$  Hz, 12-H), 7.06 (2H, d,  $J = 8.6$  Hz, 5-H), 6.59 (2H, d,  $J = 8.7$  Hz, 6-H), 4.31 (2H, s, CH<sub>2</sub> Bn), 4.19 (1H, br s, NH), 3.50 (2H, q,  $J = 10.5$  Hz, 2-H<sub>2</sub>). <sup>13</sup>C NMR (101 MHz, CDCl<sub>3</sub>) δ 148.5 (1C, C Ar), 146.5 (1C, C Ar), 145.2 (1C, C Ar), 139.2 (1C, C Ar), 133.5 (1C, C Ar), 131.9 (1C, CH Ar), 129.9 (2C, CH Ar), 129.5 (1C, CH Ar), 129.5 (1C, CH Ar), 128.9 (2C, CH Ar), 128.8 (2C, CH Ar), 128.1 (2C, CH Ar), 127.7 (3C, CH Ar), 127.5 (1C, CH Ar), 126.6 (1C, CH Ar), 126.0 (1C, q,  $J = 279.2$  Hz, CF<sub>3</sub>), 122.2 (1C, C Ar), 112.5 (2C, CH Ar), 53.4 (1C, C-1), 48.5 (1C, CH<sub>2</sub> Bn), 44.1 (1C, q,  $J = 26.5$  Hz, C-2). <sup>19</sup>F NMR (376 MHz, CDCl<sub>3</sub>) δ -55.9 (3F, CF<sub>3</sub>). HRMS (ESI): calculated for C<sub>28</sub>H<sub>24</sub>BrF<sub>3</sub>N [M+H]<sup>+</sup> requires  $m/z$  510.1039, found  $m/z$  510.1011.

***N*-Benzyl-4-[3,3,3-trifluoro-1-(2-fluorophenyl)-1-phenylpropyl]aniline, 4af.**

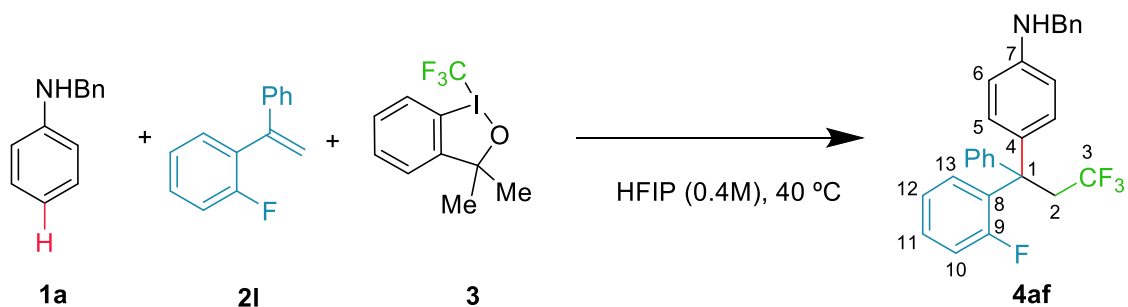

From aniline **1a** (36.7 mg, 0.2 mmol), alkene **2l** (39.6 mg, 0.2 mmol) and trifluoromethyl reagent **3** (66.0 mg, 0.2 mmol), in 0.5 mL of HFIP, following the general procedure, aniline **4af** was obtained. Chromatographic purification (gradient elution: 4:96 → 10:90 Et<sub>2</sub>O – hexane) gave **4af** (57.9 mg, 65%), as a colourless oil.

Data for **4af**: *R<sub>f</sub>* 0.45 (30% Et<sub>2</sub>O – hexane). <sup>1</sup>H NMR (400 MHz, CDCl<sub>3</sub>) δ 7.40 – 7.11 (12H, m, Ar), 7.10 – 6.98 (2H, m, Ar), 7.02 (2H, d, *J* = 8.7 Hz, 5-H), 6.56 (2H, d, *J* = 8.8 Hz, 6-H), 4.30 (2H, s, CH<sub>2</sub> Bn), 4.00 (1H, s, NH), 3.76 – 3.55 (2H, m, 2-H<sub>2</sub>). <sup>13</sup>C NMR (101 MHz, CDCl<sub>3</sub>) δ 161.6 (1C, d, *J* = 248.9 Hz, C-9), 146.6 (1C, C Ar), 145.6 (1C, C Ar), 139.4 (1C, C Ar), 133.4 (1C, C Ar), 131.7 (1C, d, *J* = 3.9 Hz, C-8), 131.4 (1C, d, *J* = 11.2 Hz, CH Ar), 129.4 (2C, CH Ar), 129.2 (1C, d, *J* = 8.9 Hz, CH Ar) 128.8 (2C, CH Ar), 128.0 (2C, CH Ar), 127.7 (2C, CH Ar), 127.4 (2C, CH Ar), 126.4 (2C, CH Ar), 126.2 (1C, q, *J* = 279.6 Hz, CF<sub>3</sub>), 123.6 (1C, d, *J* = 3.2 Hz, CH Ar), 116.3 (1C, d, *J* = 23.9 Hz, C-10), 112.3 (2C, CH Ar), 52.0 (1C, C-1), 48.5 (1C, CH<sub>2</sub> Bn), 43.6 (1C, q, *J* = 26.8, 4.6 Hz, C-2). <sup>19</sup>F NMR (376 MHz, CDCl<sub>3</sub>) δ –56.7 (3F, d, <sup>6</sup>*J*<sub>FF</sub> = 2.0 Hz, CF<sub>3</sub>), –103.3 (1F, q, <sup>6</sup>*J*<sub>FF</sub> = 2.1 Hz, F Ar). HRMS (EI): calculated for C<sub>28</sub>H<sub>23</sub>F<sub>4</sub>N [M]<sup>+</sup> requires *m/z* 449.1762, found *m/z* 449.1766.

***N*-Benzyl-4-[3,3,3-trifluoro-1-phenyl-1-(pyridin-4-yl)propyl]aniline, 4ag.**

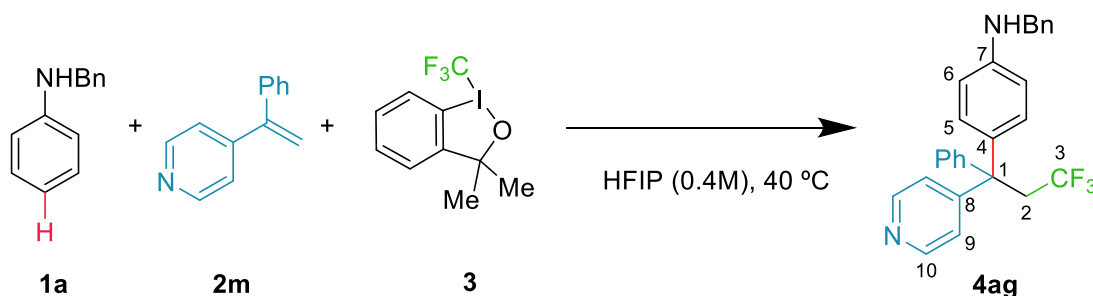

From aniline **1a** (36.7 mg, 0.2 mmol), alkene **2m** (36.2 mg, 0.2 mmol) and trifluoromethyl reagent **3** (66.0 mg, 0.2 mmol), in 0.5 mL of HFIP, following the general procedure, aniline **4ag** was obtained. Chromatographic purification (gradient elution: 49:50:1 → 69:30:1 Et<sub>2</sub>O – hexane – AcOH) gave **4ag** (35.9 mg, 41%), as a colourless oil.

Data for **4ag**: *R<sub>f</sub>* 0.30 (70% Et<sub>2</sub>O – hexane with 1% of AcOH). <sup>1</sup>H NMR (400 MHz, CDCl<sub>3</sub>) δ 8.52 (2H, s, 10-H), 7.38 – 7.20 (12H, m, Ar), 7.00 (2H, d, *J* = 8.8 Hz, 5-H), 6.56 (2H, d, *J* = 8.8 Hz, 6-H), 4.30 (2H, s, CH<sub>2</sub> Bn), 3.49 (2H, q, *J* = 10.3 Hz, 2-H<sub>2</sub>). <sup>13</sup>C NMR (101 MHz, CDCl<sub>3</sub>) δ 156.3 (1C, C Ar), 148.5 (2C, C-10), 147.0 (1C, C Ar), 144.0 (1C, C Ar), 139.1 (1C, C Ar), 132.2 (1C, C Ar), 129.8 (2C, CH Ar), 128.9 (2C, CH Ar), 128.8 (2C, CH Ar), 128.3 (2C, CH Ar), 127.7 (2C, CH Ar), 127.5 (1C, CH Ar), 127.1 (1C, CH Ar), 125.8 (1C q, *J* = 279.4 Hz, CF<sub>3</sub>), 124.3 (2C, C-9), 112.5 (2C, CH Ar), 53.5 (1C, C-1), 48.4 (1C, CH<sub>2</sub> Bn), 43.6 (1C, q, *J* = 27.0 Hz, C-2). <sup>19</sup>F NMR (376 MHz, CDCl<sub>3</sub>) δ –56.1 (3F, CF<sub>3</sub>). HRMS (ESI): calculated for C<sub>27</sub>H<sub>24</sub>F<sub>3</sub>N<sub>2</sub> [M+H]<sup>+</sup> requires *m/z* 433.1887, found *m/z* 433.1883.



### *N*-Benzyl-4[(3,3,3-trifluoro-1-phenyl-1-(pyridin-3-yl)propyl]aniline, **4ah**.

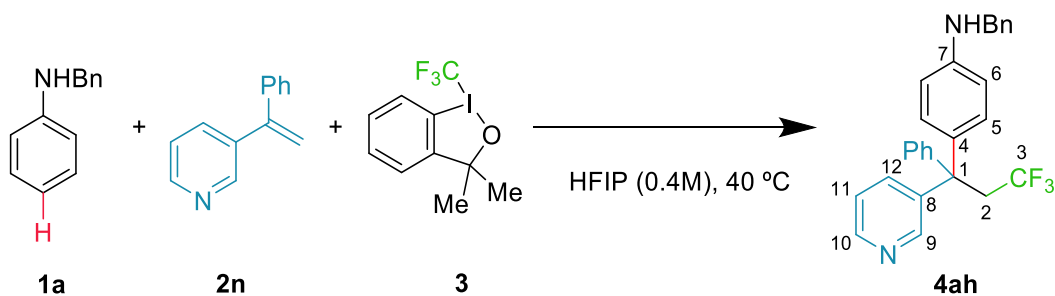

From aniline **1a** (36.7 mg, 0.2 mmol), alkene **2n** (36.2 mg, 0.2 mmol) and trifluoromethyl reagent **3** (66.0 mg, 0.2 mmol), in 0.5 mL of HFIP, following the general procedure, aniline **4ah** was obtained. Chromatographic purification (gradient elution: 10:90 → 60:40 Et<sub>2</sub>O – hexane) gave **4ah** (38.1 mg, 46%), as a colourless oil.

Data for **4ah**: *R<sub>f</sub>* 0.10 (30% Et<sub>2</sub>O – hexane). **<sup>1</sup>H NMR (400 MHz, CDCl<sub>3</sub>)** δ 8.59 (1H, s, 9-H), 8.46 (1H, d, *J* = 3.3 Hz, 10-H), 7.65 (1H, dt, *J* = 8.2 and 1.9 Hz, 12-H), 7.39 – 7.15 (11H, m, Ar), 7.02 (2H, d, *J* = 8.8 Hz, 5-H), 6.56 (2H, d, *J* = 8.8 Hz, 6-H), 4.30 (2H, s, CH<sub>2</sub> Bn), 4.04 (1H, s, NH), 3.52 (2H, q, *J* = 10.4 Hz, 2-H<sub>2</sub>). **<sup>13</sup>C NMR (101 MHz, CDCl<sub>3</sub>)** δ 150.2 (1C, C-9), 147.1 (1C, C Ar), 146.9 (1C, C-10), 145.0 (1C, C Ar), 141.5 (1C, C Ar), 139.2 (1C, C Ar), 137.0 (1C, C-12), 133.12 (1C, C Ar), 129.6 (2C, CH Ar), 128.8 (2C, CH Ar), 128.6 (2C, CH Ar), 128.3 (2C, CH Ar), 127.7 (2C, CH Ar), 127.5 (1C, CH Ar), 126.8 (1C, CH Ar), 125.9 (1C, q, *J* = 279.1 Hz, CF<sub>3</sub>), 122.9 (1C, CH Ar), 112.5 (2C, CH Ar), 52.1 (1C, C-1), 48.4 (1C, CH<sub>2</sub> Bn), 43.9 (1C, q, *J* = 26.6 Hz, C-2). **<sup>19</sup>F NMR (376 MHz, CDCl<sub>3</sub>)** δ –56.0 (3F, CF<sub>3</sub>). **HRMS (ESI)**: calculated for C<sub>27</sub>H<sub>24</sub>F<sub>3</sub>N<sub>2</sub> [M+H]<sup>+</sup> requires *m/z* 433.1887, found *m/z* 433.1786.

### *N*-Benzyl-4-[4,4,4-trifluoro-2-(4-methoxyphenyl)-1-phenylbutan-2-yl]aniline, **4ai**.

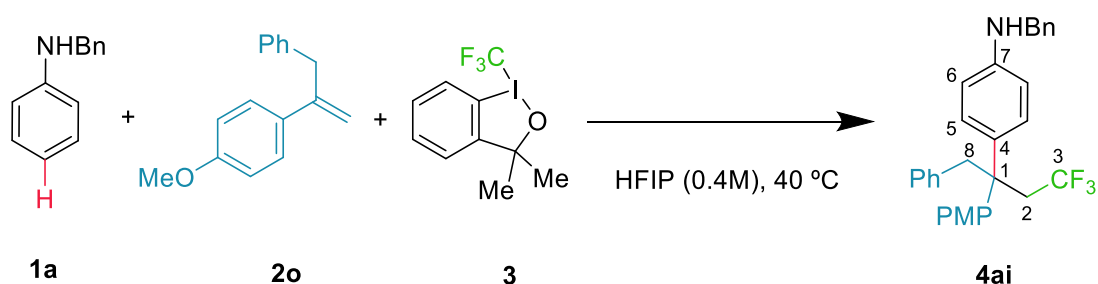

From aniline **1a** (36.6 mg, 0.20 mmol), alkene **2o** (44.9 mg, 0.20 mmol) and trifluoromethyl reagent **3** (66.0 mg, 0.20 mmol), in 0.5 mL of HFIP, following the general procedure, aniline **4ai** was obtained. Chromatographic purification (gradient elution: 0:100 → 20:80 Et<sub>2</sub>O – hexane) gave **4ai** (45.1 mg, 51%), as a yellow oil.

Data for **4ai**: *R<sub>f</sub>* 0.4 (30% Et<sub>2</sub>O – hexane). **<sup>1</sup>H NMR (400 MHz, DMSO-*d*<sub>6</sub>)** δ 7.41 – 7.28 (5H, m, Ar), 7.23 (1H, t, *J* = 7.0 Hz, NH), 7.15 – 7.01 (5H, m, Ar), 6.84 – 6.76 (4H, m, Ar), 6.58 – 6.47 (4H, m, Ar), 4.25 (2H, s, CH<sub>2</sub> Bn), 3.72 (3H, s, OMe), 3.45 (1H, d, *J* = 13.3 Hz, 8-H<sub>A</sub>), 3.41 (1H, d,

$J = 13.2$  Hz, 8- $H_B$ ), 2.89 – 2.72 (2H, m, 2- $H_2$ ).  $^{13}\text{C}$  NMR (101 MHz, DMSO- $d_6$ )  $\delta$  157.3 (1C, C Ar), 146.4 (1C, C Ar), 140.0 (1C, C Ar), 138.4 (1C, C Ar), 137.0 (1C, C Ar), 133.6 (1C, C Ar), 130.5 (2C, CH Ar), 128.9 (2C, CH Ar), 128.2 (4C, CH Ar), 127.4 (2C, CH Ar), 127.4 (2C, CH Ar), 127.1 (1C, q,  $J = 279.0$  Hz,  $\text{CF}_3$ ), 126.7 (1C, CH Ar), 126.2 (1C, CH Ar), 112.9 (2C, CH Ar), 112.0 (2C, CH Ar), 54.9 (1C, OMe), 46.9 (1C,  $\text{CH}_2$  Bn), 46.2 (1C, C-1), 44.4 (1C, C-8), 39.1 (1C, C-2).  $^{19}\text{F}$  NMR (376 MHz, DMSO- $d_6$ )  $\delta$  –55.9 (3F,  $\text{CF}_3$ ). HRMS (ESI): calculated for  $\text{C}_{30}\text{H}_{29}\text{F}_3\text{NO}$   $[\text{M}+\text{H}]^+$  requires  $m/z$  476.2196, found  $m/z$  476.2190.

#### Methyl 4-[4-(benzylamino)phenyl]-6,6,6-trifluoro-4-(4-methoxyphenyl)hexanoate, **4aj**.

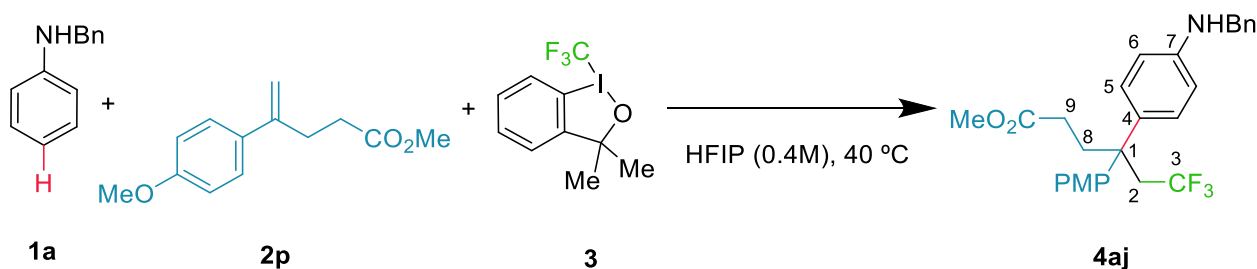

From aniline **1a** (37.6 mg, 0.205 mmol), alkene **2p** (45.2 mg, 0.205 mmol) and trifluoromethyl reagent **3** (67.7 mg, 0.205 mmol), in 0.5 mL of HFIP, following the general procedure, aniline **4aj** was obtained. Chromatographic purification (gradient elution: 0:100 → 20:80  $\text{Et}_2\text{O}$  – hexane) gave **4aj** (69.0 mg, 71%), as a yellow oil.

Data for **4aj**:  $R_f$  0.15 (30%  $\text{Et}_2\text{O}$  – hexane).  $^1\text{H}$  NMR (400 MHz,  $\text{CDCl}_3$ )  $\delta$  7.47 – 7.27 (5H, m, Ar), 7.10 (2H, d,  $J = 8.9$  Hz, Ar), 6.95 (2H, d,  $J = 8.7$  Hz, 5-H), 6.81 (2H, d,  $J = 8.9$  Hz, Ar), 6.57 (2H, d,  $J = 8.7$  Hz, 6-H), 4.30 (2H, s,  $\text{CH}_2$  Bn), 3.79 (3H, s, OMe), 3.60 (3H, s,  $\text{CO}_2\text{Me}$ ), 2.91 (2H, q,  $J = 10.8$  Hz, 2- $H_2$ ), 2.63 – 2.54 (2H, m, 9- $H_2$ ), 2.12 – 2.03 (2H, m, 8- $H_2$ ).  $^{13}\text{C}$  NMR (101 MHz,  $\text{CDCl}_3$ )  $\delta$  173.9 (1C, C=O), 158.0 (1C, C Ar), 146.4 (1C, C Ar), 139.2 (1C, C Ar), 138.3 (1C, C Ar), 135.0 (1C, C Ar), 128.8 (2C, CH Ar), 128.7 (2C, CH Ar), 128.3 (2C, CH Ar), 127.8 (2C, CH Ar), 127.5 (1C, CH Ar), 126.7 (1C, q,  $J = 279.1$  Hz,  $\text{CF}_3$ ), 113.5 (2C, CH Ar), 112.8 (2C, C-6), 55.3 (1C, OMe), 51.7 (1C,  $\text{CO}_2\text{Me}$ ), 48.7 (1C,  $\text{CH}_2$  Bn), 45.3 (1C, C-1), 41.7 (1C, q,  $J = 25.5$  Hz, C-2), 33.2 (1C, C-9), 29.7 (1, C-8).  $^{19}\text{F}$  NMR (376 MHz,  $\text{CDCl}_3$ )  $\delta$  –58.9 (3F,  $\text{CF}_3$ ). HRMS (ESI): calculated for  $\text{C}_{27}\text{H}_{29}\text{F}_3\text{NO}_3$   $[\text{M}+\text{H}]^+$  requires  $m/z$  472.2095, found  $m/z$  472.2075.

#### *N*-Benzyl-4-[1,1,1-trifluoro-3-(4-methoxyphenyl)-5-(thiophen-2-yl)pentan-3-yl]aniline, **4ak**.

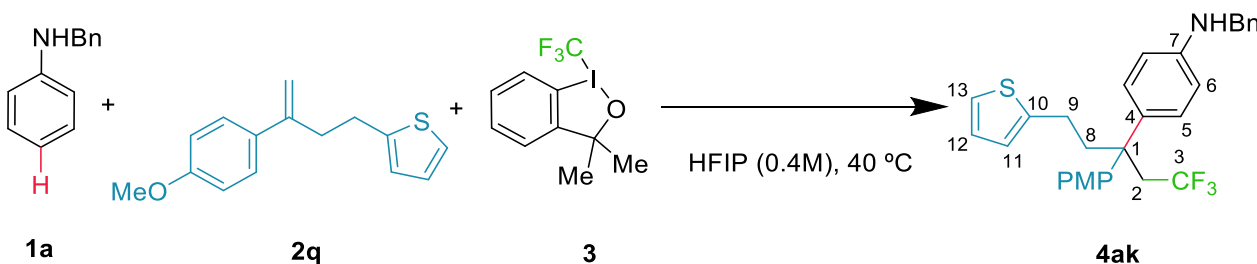

From aniline **1a** (36.6 mg, 0.20 mmol), alkene **2q** (48.9 mg, 0.20 mmol) and trifluoromethyl reagent **3** (66.0 mg, 0.20 mmol), in 0.5 mL of HFIP, following the general procedure, aniline **4ak** was obtained. Chromatographic purification (gradient elution: 0:100 → 20:80 Et<sub>2</sub>O – hexane) gave **4ak** (60.0 mg, 61%), as a colourless oil.

Data for **4ak**: *R<sub>f</sub>* 0.25 (30% Et<sub>2</sub>O – hexane). <sup>1</sup>H NMR (400 MHz, CDCl<sub>3</sub>) δ 7.41 – 7.27 (5H, m, Ar), 7.13 (2H, d, *J* = 8.9 Hz, Ar), 7.10 (1H, dd, *J* = 5.0 and 1.2 Hz, 13-H), 6.99 (2H, d, *J* = 8.7 Hz, 5-H), 6.90 (1H, dd, *J* = 5.1 and 3.4 Hz, 12-H), 6.83 (2H, d, *J* = 8.9 Hz, Ar), 6.73 (1H, dd, *J* = 3.4 and 1.1 Hz, 11-H), 6.59 (2H, d, *J* = 8.7 Hz, 6-H), 4.31 (2H, s, CH<sub>2</sub> Bn), 3.80 (3H, s, OMe), 3.00 (2H, qd, *J* = 10.8 and 2.0 Hz, 2-H<sub>2</sub>), 2.65 – 2.58 (2H, m, 9-H<sub>2</sub>), 2.57 – 2.51 (2H, m, 8-H<sub>2</sub>). <sup>13</sup>C NMR (101 MHz, CDCl<sub>3</sub>) δ 157.9 (1C, C Ar), 146.4 (1C, C Ar), 145.1 (1C, C Ar), 139.3 (1C, C Ar), 138.9 (1C, C Ar), 135.6 (1C, C Ar), 128.8 (2C, CH Ar), 128.6 (2C, CH Ar), 128.3 (2C, CH Ar), 127.9 (2C, CH Ar), 127.5 (1C, CH Ar), 126.9 (1C, C-12), 126.8 (1C, q, *J* = 279.0 Hz, CF<sub>3</sub>), 124.2 (1C, C-11), 123.1 (1C, C-13), 113.5 (2C, CH Ar), 112.8 (2C, CH Ar), 55.3 (1C, OMe), 48.8 (1C, CH<sub>2</sub> Bn), 45.8 (1C, C-1), 41.5 (1C, q, *J* = 25.5 Hz, C-2), 40.7 (1C, C-9), 25.2 (1C, C-8). <sup>19</sup>F NMR (376 MHz, CDCl<sub>3</sub>) δ –58.81 (3F, CF<sub>3</sub>). HRMS (ESI): calculated for C<sub>29</sub>H<sub>29</sub>F<sub>3</sub>NOS [M+H]<sup>+</sup> requires *m/z* 496.1917, found *m/z* 496.1915.

#### *N*-Benzyl-4-[1,1,1-trifluoro-3-(4-methoxyphenyl)-5-(pyridin-3-yl)pentan-3-yl]aniline, **4al**.

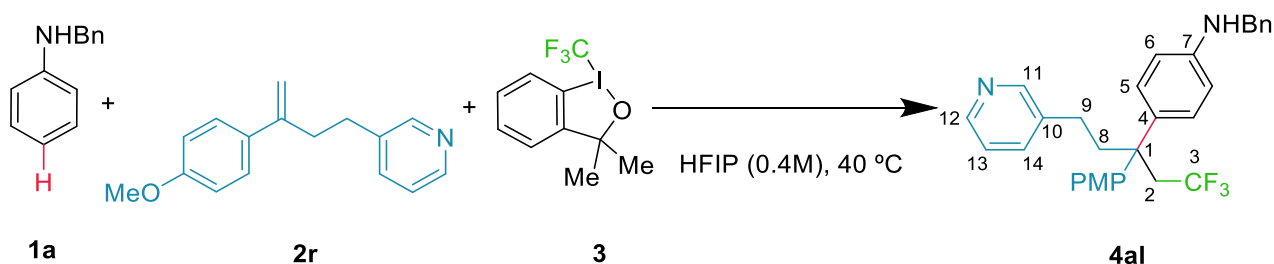

From aniline **1a** (36.6 mg, 0.20 mmol), alkene **2r** (47.9 mg, 0.20 mmol) and trifluoromethyl reagent **3** (66.0 mg, 0.20 mmol), in 0.5 mL of HFIP, following the general procedure, aniline **4al** was obtained. Chromatographic purification (gradient elution: 20:100 → 80:20 Et<sub>2</sub>O – hexane) gave **4al** (75.4 mg, 77%), as a colourless oil.

Data for **4al**: *R<sub>f</sub>* 0.1 (70% Et<sub>2</sub>O – hexane). <sup>1</sup>H NMR (400 MHz, CDCl<sub>3</sub>) δ 8.44 (1H, d, *J* = 3.9 Hz, 12-H), 8.32 (1H, s, 11-H), 7.43 (1H, dt, *J* = 7.8 and 2.0 Hz, 14-H), 7.40 – 7.27 (5H, m, Ar), 7.21 (1H, dd, *J* = 7.8 and 4.8 Hz, 13-H), 7.11 (2H, d, *J* = 8.9 Hz, Ar), 6.96 (2H, d, *J* = 8.7 Hz, 5-H), 6.82 (2H, d, *J* = 8.9 Hz, Ar), 6.58 (2H, d, *J* = 8.7 Hz, 6-H), 4.30 (2H, s, CH<sub>2</sub> Bn), 3.79 (3H, s, OMe), 3.12 – 2.93 (2H, m, 2-H<sub>2</sub>), 2.50 (2H, m, 9-H<sub>2</sub>), 2.33 (2H, m, 8-H<sub>2</sub>). <sup>13</sup>C NMR (101 MHz, CDCl<sub>3</sub>) δ 158.0 (1C, C Ar), 149.7 (1C, C-12), 147.2 (1C, C-11), 146.6 (1C, C Ar), 139.4 (1C, C Ar), 139.0 (1C, C Ar), 137.9 (1C, C Ar), 136.2 (1C, C-14), 135.5 (1C, C Ar), 128.8 (2C, CH Ar), 128.5 (2C, CH Ar), 128.2 (2C, CH Ar), 128.0 (2C, CH Ar), 127.5 (1C, CH Ar), 126.9 (1C, q, *J* = 279.5 Hz, CF<sub>3</sub>), 123.6

(1C, C-13), 113.6 (2C, CH Ar), 112.7 (2C, CH Ar), 55.3 (1C, OMe), 48.6 (1C, CH<sub>2</sub> Bn), 45.8 (1C, C-1), 41.2 (1C, q, *J* = 25.6 Hz, C-2), 40.5 (1C, C-9), 28.2 (1C, C-8). <sup>19</sup>F NMR (376 MHz, CDCl<sub>3</sub>) δ -58.8 (3F, CF<sub>3</sub>) HRMS (ESI): calculated for C<sub>30</sub>H<sub>23</sub>O<sub>3</sub>F<sub>3</sub>N<sub>2</sub> [M+H]<sup>+</sup> requires *m/z* 491.2305, found *m/z* 491.2301.

***N*-Benzyl-4-[5-(2,2,2-trifluoroethyl)-10,11-dihydro-5H-dibenzo[*a,d*][7]annulen-5-yl]aniline, **4am**.**

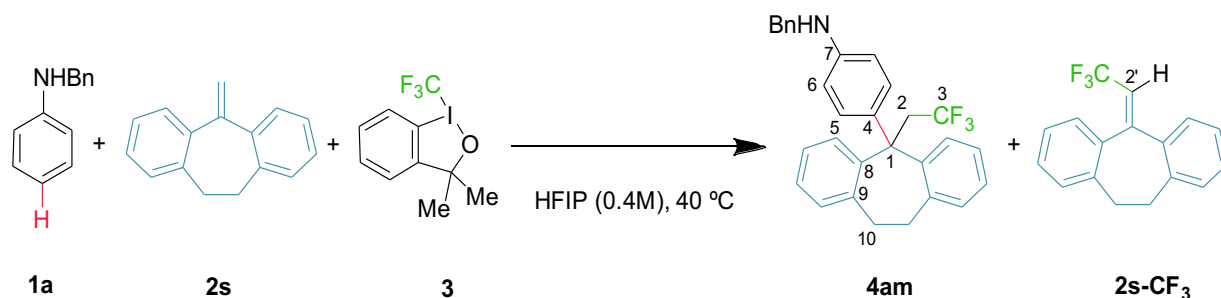

From aniline **1a** (36.6 mg, 0.20 mmol), alkene **2s** (41.3 mg, 0.20 mmol) and trifluoromethyl reagent **3** (66.0 mg, 0.20 mmol), in 0.5 mL of HFIP, following the general procedure, aniline **4am** was obtained. Chromatographic purification (gradient elution: 5:95 → 10:90 Et<sub>2</sub>O – hexane) gave **4am** (38.0 mg, 42%), as a colourless oil and a 2:1 mixture of unreacted alkene **2s** : trifluoromethyl alkene **2s-CF<sub>3</sub>** (25.8 mg).

Data for **4am**: *R<sub>f</sub>* 0.5 (30% Et<sub>2</sub>O – hexane). <sup>1</sup>H NMR (400 MHz, CDCl<sub>3</sub>) δ 7.39 – 7.26 (5H, m, Ar), 7.25 – 7.18 (2H, m, Ar), 7.13 – 7.07 (4H, m, Ar), 7.06 – 6.99 (2H, m, Ar), 6.92 (2H, d, *J* = 8.6 Hz, Ar), 6.57 (2H, d, *J* = 8.6 Hz, 6-H), 4.29 (2H, s, CH<sub>2</sub> Bn), 3.49 (2H, q, *J* = 10.2 Hz, 2-H<sub>2</sub>), 2.90 (4H, s, 10-H<sub>2</sub>). <sup>13</sup>C NMR (101 MHz, CDCl<sub>3</sub>) δ 145.7 (2C, C Ar), 143.9 (1C, C Ar), 139.7 (2C, C Ar), 138.7 (2C, C Ar), 131.5 (2C, CH Ar), 128.9 (2C, CH Ar), 128.8 (2C, CH Ar), 128.0 (2C, CH Ar), 127.6 (1C, CH Ar), 127.5 (2C, CH Ar), 126.7 (2C, CH Ar), 126.4 (1C, q, *J* = 280.7 Hz, CF<sub>3</sub>), 125.9 (2C, CH Ar), 113.2 (2C, CH Ar), 53.1 (1C, C-1), 49.0 (1C, CH<sub>2</sub> Bn), 46.4 (1C, C-2), 34.1 (2C, C-10). <sup>19</sup>F NMR (376 MHz, CDCl<sub>3</sub>) δ -56.1 (3F, CF<sub>3</sub>). HRMS (ESI): calculated for C<sub>30</sub>H<sub>27</sub>F<sub>3</sub>N [M+H]<sup>+</sup> requires *m/z* 458.2091, found *m/z* 458.2094.

Partial data for **2s-CF<sub>3</sub>** (from the mixture): *R<sub>f</sub>* 0.5 (5% Et<sub>2</sub>O – hexane). <sup>1</sup>H NMR (400 MHz, CDCl<sub>3</sub>) δ 7.51 – 6.96 (8H, m, Ar), 6.03 (1H, q, *J* = 8.1 Hz, 2-H), 3.57 – 3.26 (2H, m, CH<sub>2</sub>), 3.10 – 2.75 (2H, m, CH<sub>2</sub>). <sup>19</sup>F NMR (376 MHz, CDCl<sub>3</sub>) δ -56.03 (3F, CF<sub>3</sub>).

***N*-Benzyl-4-[5-(2,2,2-trifluoroethyl)-10,11-dihydro-5H-dibenzo[*a,d*][7]annulen-5-yl]aniline, **4an**.**

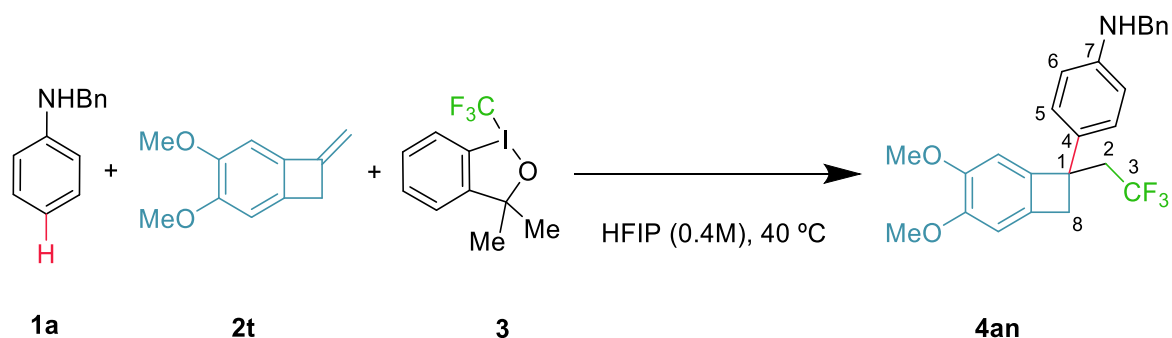

From aniline **1a** (36.6 mg, 0.20 mmol), alkene **2t** (45.2 mg, 0.20 mmol) and trifluoromethyl reagent **3** (66.0 mg, 0.20 mmol), in 0.5 mL of HFIP, following the general procedure, aniline **4an** was obtained. Chromatographic purification (gradient elution: 0:100  $\rightarrow$  50:50 Et<sub>2</sub>O – hexane) gave **4an** (16.8 mg, 20%), as a colourless oil.

Data for **4an**: *R*<sub>f</sub> 0.1 (30% Et<sub>2</sub>O – hexane). <sup>1</sup>H NMR (400 MHz, CDCl<sub>3</sub>) δ 7.40 – 7.28 (5H, m, Ar), 7.19 (2H, d, *J* = 8.6 Hz, 5-H), 6.98 (1H, d, *J* = 1.2 Hz, Ar), 6.69 (1H, s, Ar), 6.68 (2H, d, *J* = 8.4 Hz, 6-H) 4.31 (2H, s, CH<sub>2</sub> Bn), 3.92 (3H, s, OMe), 3.84 (3H, s, OMe), 3.38 (1H, d, *J* = 13.2 Hz, 8-H<sub>A</sub>), 3.27 (1H, d, *J* = 13.3 Hz, 8-H<sub>B</sub>), 3.00 – 2.89 (1H, m, 2-H<sub>A</sub>), 2.69 (1H, dq, *J* = 14.9 and 10.8 Hz, 2-H<sub>B</sub>). <sup>13</sup>C NMR (101 MHz, CDCl<sub>3</sub>) δ 150.8 (1C, C Ar), 149.8 (1C, C Ar), 139.3 (1C, C Ar), 138.2 (1C, C Ar), 137.0 (1C, C Ar), 133.1 (1C, C Ar), 132.4 (1C, C Ar), 128.8 (2C, CH Ar), 128.2 (1C, CH Ar), 127.7 (4C, CH Ar), 126.5 (1C, q, *J* = 278.5 Hz, CF<sub>3</sub>), 114.0 (2C, C-6) 108.1 (1C, CH Ar), 107.7 (1C, CH Ar), 56.6 (1C, OMe), 56.4 (1C, OMe), 50.5 (1C, C-1), 49.4 (1C, CH<sub>2</sub> Bn), 46.0 (1C, C-8), 44.5 (1C, q, *J* = 26.3 Hz, C-2). <sup>19</sup>F NMR (376 MHz, CDCl<sub>3</sub>) δ –61.2 (3F, CF<sub>3</sub>). HRMS (ESI): calculated for C<sub>25</sub>H<sub>25</sub>F<sub>3</sub>NO<sub>2</sub> [M+H]<sup>+</sup> requires *m/z* 428.1832, found *m/z* 428.1825.

***N*-Benzyl-4-(3,3,3-trifluoro-1-(4-methoxyphenyl)-2-methylpropyl)aniline, **4ao**.**

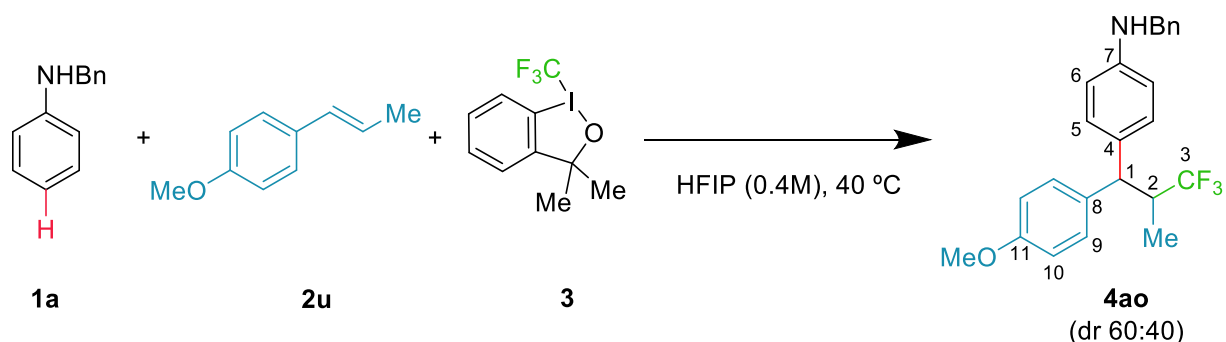

From aniline **1a** (36.7 mg, 0.2 mmol), alkene **2u** (29.6 mg, 0.2 mmol) and trifluoromethyl reagent **3** (66.0 mg, 0.2 mmol), in 0.5 mL of HFIP, following the general procedure, aniline **4ao** was obtained as a 60:40 diastereomeric ratio. Chromatographic purification (gradient elution: 0:100  $\rightarrow$  15:85 Et<sub>2</sub>O – hexane) gave **4ao** (55.3 mg, 70%) in a 60:40 diastereomeric ratio, as a colourless oil.

Data for **4ao-major isomer** (from the mixture):  $R_f$  0.30 (30% Et<sub>2</sub>O – hexane).  $^1\text{H NMR}$  (400 MHz, CDCl<sub>3</sub>)  $\delta$  7.41 – 7.25 (5H, m, Ar), 7.17 (2H, d,  $J$  = 8.7 Hz, 9-H), 7.10 (2H, d,  $J$  = 8.5 Hz, 5-H), 6.84 (2H, d,  $J$  = 8.9 Hz, 10-H), 6.57 (2H, d,  $J$  = 8.6 Hz, 6-H), 4.29 (2H s, CH<sub>2</sub> Bn), 3.96 (1H, d,  $J$  = 9.5 Hz, 1-H), 3.78 (3H, s, OMe), 3.17 – 2.98 (1H, m, 2-H), 1.07 (3H, d,  $J$  = 7.0 Hz, Me).  $^{13}\text{C NMR}$  (101 MHz, CDCl<sub>3</sub>)  $\delta$  158.2 (1C, C Ar), 146.7 (1C, C Ar), 139.5 (1C, C Ar), 134.9 (1C, C Ar), 132.2 (1C, C Ar), 129.3 (2C, CH Ar), 128.7 (2C, CH Ar), 128.5 (2C, CH Ar), 127.7 (2C, CH Ar), 127.3 (1C, CH Ar), 128.3 (1C, q,  $J$  = 281.0 Hz, CF<sub>3</sub>), 114.0 (2C, CH Ar), 112.9 (2C, CH Ar), 55.3 (1C, OMe), 50.7 (1C, C-1), 48.6 (1C, CH<sub>2</sub> Bn), 41.9 (1C, q,  $J$  = 24.0 Hz, C-2), 13.0 (1C, d,  $J$  = 3.1 Hz, Me).  $^{19}\text{F NMR}$  (376 MHz, CDCl<sub>3</sub>)  $\delta$  –68.5 (3F, CF<sub>3</sub>). HRMS (EI): calculated for C<sub>24</sub>H<sub>24</sub>F<sub>3</sub>NO [M]<sup>+</sup> requires  $m/z$  399.1805, found  $m/z$  399.1784.

Partial data for **4ao-minor isomer** (from the mixture): The NMR signals overlapped with those of **4ao-major isomer**, except for:  $^1\text{H NMR}$  (400 MHz, CDCl<sub>3</sub>)  $\delta$  7.21 (2H, d,  $J$  = 8.7 Hz, 9-H), 7.05 (2H, d,  $J$  = 8.6 Hz, 5-H), 6.82 (2H, d,  $J$  = 8.7 Hz, 10-H), 6.58 (2H, d,  $J$  = 8.6 Hz, 6-H), 3.92 (1H, d,  $J$  = 9.9 Hz, 1-H), 3.77 (3H, s, OMe), 1.09 (3H, d,  $J$  = 6.9 Hz, Me).  $^{13}\text{C NMR}$  (101 MHz, CDCl<sub>3</sub>)  $\delta$  158.0 (1C, C Ar), 146.9 (1C, C Ar), 135.8 (1C, C Ar), 131.4 (1C, C Ar), 128.7 (2C, CH Ar), 128.6 (1C, CH Ar), 127.6 (2C, CH Ar), 127.4 (1C, CH Ar), 113.8 (2C, CH Ar), 113.1 (2C, CH Ar), 55.2 (1C, OMe), 50.9 (1C, C-1), 48.5 (1C, CH<sub>2</sub> Bn), 42.0 (1C, q,  $J$  = 23.9 Hz, C-2), 13.2 (1C, d,  $J$  = 3.1 Hz, Me).  $^{19}\text{F NMR}$  (376 MHz, CDCl<sub>3</sub>)  $\delta$  –68.4 (3F, CF<sub>3</sub>).

***N*-Benzyl-4-[5,6-dimethoxy-2-(trifluoromethyl)-2,3-dihydro-1H-inden-1-yl]aniline, 4ap.**

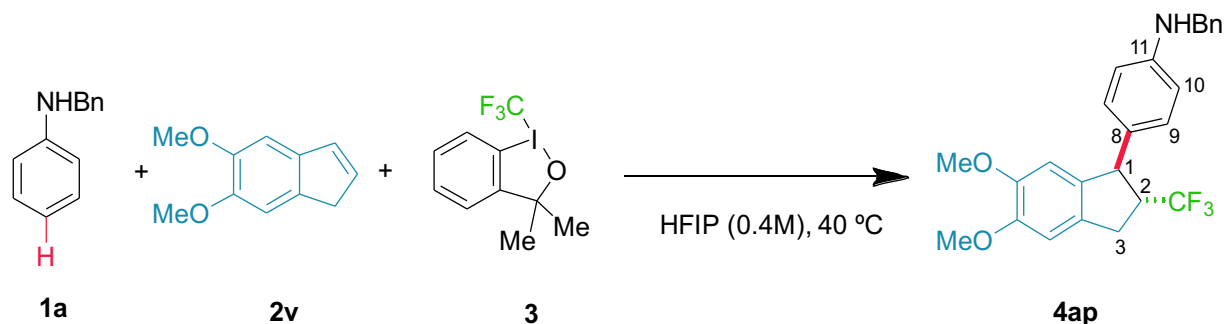

From aniline **1a** (36.7 mg, 0.2 mmol), alkene **2v** (35.2 mg, 0.2 mmol) and trifluoromethyl reagent **3** (66.0 mg, 0.2 mmol), in 0.5 mL of HFIP at room temperature, following the general procedure, aniline **4ap** was obtained. Chromatographic purification (gradient elution: 15:85 → 20:80 Et<sub>2</sub>O – hexane) gave **4ap** (42.5 mg, 50%), as a colourless oil.

Data for **4ap**:  $R_f$  0.10 (30% Et<sub>2</sub>O – hexane).  $^1\text{H NMR}$  (400 MHz, CDCl<sub>3</sub>)  $\delta$  7.42 – 7.27 (5H, m, Ar), 6.97 (2H, d,  $J$  = 8.5 Hz, 9-H), 6.78 (1H, s, Ar), 6.61 (2H, d,  $J$  = 8.5 Hz, 10-H), 6.43 (1H, s, Ar), 4.42 (1H, d,  $J$  = 6.9 Hz, 1-H), 4.32 (2H, s, CH<sub>2</sub> Bn), 4.03 (1H, br s, NH), 3.89 (3H, s, OMe), 3.74 (3H, s, OMe), 3.28 – 3.18 (1H, m, 3-H<sub>A</sub>), 3.15 – 2.99 (2H, m, 3-H<sub>B</sub> and 2-H).  $^{13}\text{C NMR}$  (101 MHz, CDCl<sub>3</sub>)  $\delta$  148.9 (2C, C Ar), 147.2 (1C, C Ar), 139.4 (1C, C Ar), 136.5 (1C, C Ar), 132.7 (1C, C Ar),

132.0 (1C, C Ar), 129.1 (2C, C-9), 128.7 (2C, CH Ar), 127.7 (2C, CH Ar), 128.2 (1C, q,  $J = 278.3$  Hz, CF<sub>3</sub>), 127.4 (1C, CH Ar), 113.1 (2C, C-10), 108.06 (1C, CH Ar), 107.0 (1C, CH Ar), 56.2 (2C, 2 x OMe), 52.9 (1C, q,  $J = 25.7$  Hz, C-2), 51.3 (1C, C-1), 48.6 (1C, CH<sub>2</sub> Bn), 32.2 (1C, C-3). **<sup>19</sup>F NMR (376 MHz, CDCl<sub>3</sub>)**  $\delta$  -70.3 (3F, CF<sub>3</sub>). **HRMS (EI):** calculated for C<sub>25</sub>H<sub>24</sub>F<sub>3</sub>NO<sub>2</sub> [M]<sup>+</sup> requires  $m/z$  427.1754, found  $m/z$  427.1749.

***N*-Benzyl-4-[6-methoxy-2-(trifluoromethyl)-1,2,3,4-tetrahydronaphthalen-1-yl]aniline, 4aq.**

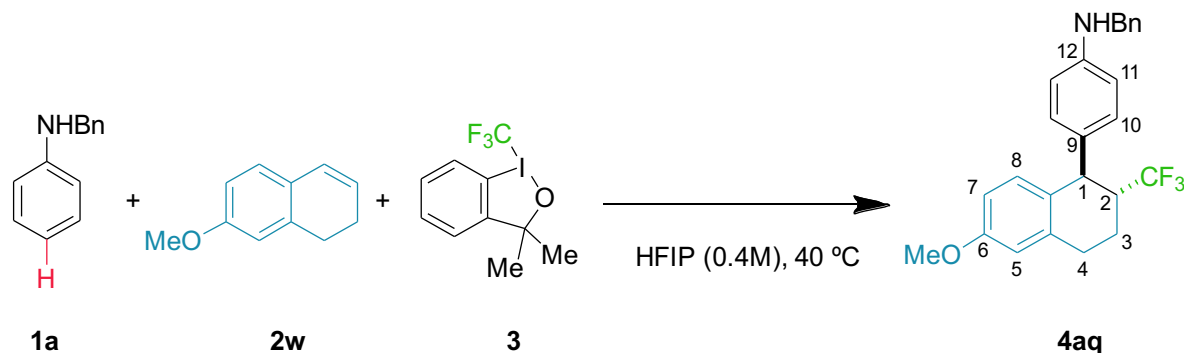

From aniline **1a** (36.7 mg, 0.2 mmol), alkene **2w** (32.0 mg, 0.2 mmol) and trifluoromethyl reagent **3** (66.0 mg, 0.2 mmol), in 0.5 mL of HFIP, following the general procedure, aniline **4aq** was obtained. Chromatographic purification (gradient elution: 0:100 → 15:85 Et<sub>2</sub>O – hexane) gave **4aq** (66.4 mg, 81%) as a colourless oil.

Data for **4aq**:  $R_f$  0.30 (20% Et<sub>2</sub>O – hexane). **<sup>1</sup>H NMR (400 MHz, CDCl<sub>3</sub>)**  $\delta$  7.45 – 7.23 (5H, m, Ar), 6.90 (2H, d,  $J = 8.5$  Hz, 10-H), 6.82 (1H, d,  $J = 8.2$  Hz, 8-H), 6.67 (1H, s, 5-H), 6.66 (1H, d,  $J = 8.3$  Hz, 7-H), 6.59 (2H, d,  $J = 8.6$  Hz, 11-H), 4.31 (2H, s, CH<sub>2</sub> Bn), 4.17 (1H, d,  $J = 6.8$  Hz, 1-H), 3.97 (1H, d,  $J = 3.6$  Hz, NH), 3.79 (3H, s, OMe), 2.91 (2H, t,  $J = 6.5$  Hz, 4-H<sub>2</sub>), 2.76 – 2.59 (1H, m, 2-H), 2.18 (1H, dtd,  $J = 13.5, 6.1$  and  $3.9$  Hz, 3-H<sub>A</sub>), 1.90 (1H, ddt,  $J = 13.7, 8.9$  and  $7.0$  Hz, 3-H<sub>B</sub>). **<sup>13</sup>C NMR (101 MHz, CDCl<sub>3</sub>)**  $\delta$  157.7 (1C, C Ar), 146.8 (1C, C Ar), 139.5 (1C, C Ar), 137.2 (1C, C Ar), 134.9 (1C, C Ar), 131.6 (1C, C-8), 130.2 (1C, C Ar), 129.6 (2C, C-10), 128.7 (2C, CH Ar), 128.1 (1C, q,  $J = 281.1$  Hz, CF<sub>3</sub>), 127.7 (2C, CH Ar), 127.4 (1C, CH Ar), 112.9 (2C, C-11), 112.8 (1C, C-7), 112.7 (1C, C-5), 55.2 (1C, OMe), 48.6 (1C, CH<sub>2</sub> Bn), 46.7 (1C, q,  $J = 24.4$  Hz, C-2), 43.0 (1C, C-1), 27.7 (1C, C-4), 20.9 (1C, C-3). **<sup>19</sup>F NMR (376 MHz, CDCl<sub>3</sub>)**  $\delta$  -69.5 (3F, CF<sub>3</sub>). **HRMS (EI):** calculated for C<sub>25</sub>H<sub>24</sub>F<sub>3</sub>NO [M]<sup>+</sup> requires  $m/z$  411.1805, found  $m/z$  411.1815.



### *N*-Benzyl-4-(3,3,3-trifluoro-1,1-diphenylpropyl)aniline, **4ar**.

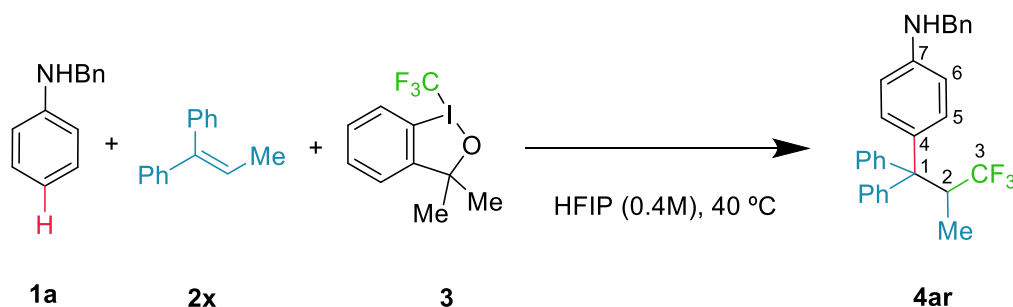

From aniline **1a** (36.0 mg, 0.20 mmol), alkene **2x** (38.2 mg, 0.20 mmol) and trifluoromethyl reagent **3** (64.9 mg, 0.20 mmol), in 0.5 mL of HFIP, following the general procedure, aniline **4ar** was obtained. Chromatographic purification (gradient elution: 0:100 → 15:85 Et<sub>2</sub>O – hexane) gave **4ar** (61.1 mg, 70%), as a colourless oil.

Data for **4ar**: *R<sub>f</sub>* 0.5 (30% Et<sub>2</sub>O – hexane). <sup>1</sup>H NMR (400 MHz, CDCl<sub>3</sub>) δ 7.43 – 7.27 (10H, m, Ar), 7.23 (3H, m, Ar), 7.17 (4H, m, Ar), 6.58 (2H, d, *J* = 8.6 Hz, H-6), 4.29 (2H, s, CH<sub>2</sub> Bn), 4.28 – 4.10 (1H, m, 2-H), 1.27 (3H, d, *J* = 6.8 Hz, Me). <sup>13</sup>C NMR (101 MHz, CDCl<sub>3</sub>) δ 145.7 (1C, C Ar), 139.0 (1C, C Ar), 130.9 (1C, C Ar), 129.9 (1C, C Ar), 129.2 (1C, C Ar), 128.8 (3C, CH Ar), 128.1 (1C, q, *J* = 282.8 Hz, CF<sub>3</sub>), 128.0 (3C, CH Ar), 127.7 (3C, CH Ar), 127.62 (3C, CH Ar), 127.56 (3C, CH Ar), 125.9 (2C, CH Ar), 112.5 (2C, CH Ar), 58.2 (1C, C-1), 49.0 (1C, CH<sub>2</sub> Bn), 42.7 (1C, q, *J* = 23.6 Hz, C-2), 11.7 (1C, Me). <sup>19</sup>F NMR (376 MHz, CDCl<sub>3</sub>) δ –61.6 (3F, CF<sub>3</sub>). HRMS (ESI): calculated for C<sub>29</sub>H<sub>27</sub>F<sub>3</sub>N [M+H]<sup>+</sup> requires *m/z* 446.2091, found *m/z* 446.2084.

### *N*-Benzyl-4-[1-phenyl-2-(trifluoromethyl)cyclohexyl]aniline, **4as**.

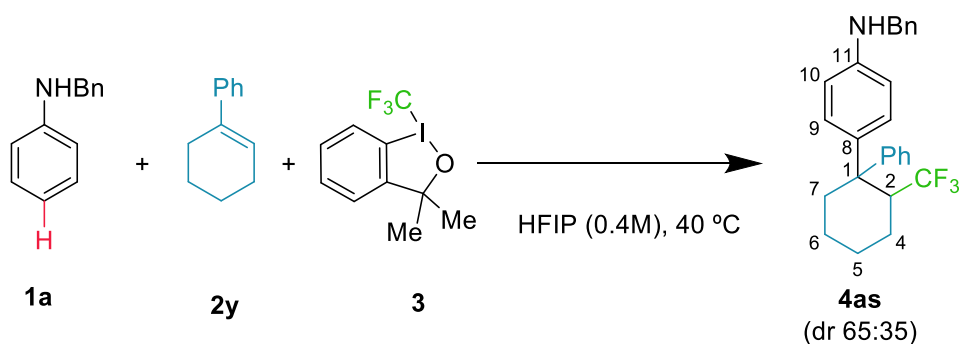

From aniline **1a** (31.6 mg, 0.2 mmol), alkene **2y** (36.7 mg, 0.2 mmol), and trifluoromethyl reagent **3** (66.0 mg, 0.2 mmol), in 0.5 mL of HFIP, following the general procedure, aniline **4as** was obtained as a 65:35 diastereomeric ratio. Chromatographic purification (gradient elution: 0:100 → 10:90 Et<sub>2</sub>O – hexane) gave **4as** (24 mg, 37%) in a 65:35 diastereomeric ratio, as a colourless oil.

Data for **4as-major isomer** (from the mixture): *R<sub>f</sub>* 0.50 (30% Et<sub>2</sub>O – hexane). <sup>1</sup>H NMR (400 MHz, CDCl<sub>3</sub>) δ 7.42 – 7.09 (10H, m, Ar), 7.09 (2H, d, *J* = 8.7 Hz, 9-H), 6.61 (2H, d, *J* = 8.7 Hz, 10-H), 4.30 (2H, s, CH<sub>2</sub> Bn), 4.08 (1H, s, NH), 3.44 – 3.30 (1H, m, 2-H), 2.74 – 2.59 (1H, m, CH<sub>2</sub> *c*-Hex), 2.48 – 2.36 (1H, m, CH<sub>2</sub> *c*-Hex), 2.14 – 2.00 (2H, m, CH<sub>2</sub> *c*-Hex), 1.77 – 1.65 (1H, m, CH<sub>2</sub> *c*-Hex).



Hex), 1.66 – 1.47 (2H, m, CH<sub>2</sub> *c*-Hex), 1.41 – 1.21 (1H, m, CH<sub>2</sub> *c*-Hex). <sup>13</sup>C NMR (101 MHz, CDCl<sub>3</sub>) δ 147.5 (1C, C Ar), 145.9 (1C, C Ar), 139.4 (1C, C Ar), 135.3 (1C, C Ar), 128.7 (2C, CH Ar), 128.4 (1C, q, *J* = 283.8 Hz, CF<sub>3</sub>), 128.0 (2C, CH Ar), 127.8 (2C, CH Ar), 127.7 (2C, CH Ar), 127.5 (1C, CH Ar), 127.1 (1C, CH Ar), 125.8 (2C, CH Ar), 113.1 (2C, C-10), 48.7 (1C, CH<sub>2</sub> Bn), 46.7 (1C, C-1), 45.9 (1C, q, *J* = 20.9 Hz, C-2), 31.8 (1C, CH<sub>2</sub> *c*-Hex), 23.2 (1C, q, *J* = 3.0 Hz, C-4), 22.0 (1C, CH<sub>2</sub> *c*-Hex), 21.8 (1C, CH<sub>2</sub> *c*-Hex). <sup>19</sup>F NMR (376 MHz, CDCl<sub>3</sub>) δ –58.0 (3F, CF<sub>3</sub>), –58.2 (3F, CF<sub>3</sub>). HRMS (EI): calculated for C<sub>26</sub>H<sub>26</sub>F<sub>3</sub>N [M]<sup>+</sup> requires *m/z* 409.2012, found *m/z* 409.2022.

Partial data for **4as-minor isomer** (from the mixture): The NMR signals overlapped with those of **4as-major isomer**, except for: <sup>1</sup>H NMR (400 MHz, CDCl<sub>3</sub>) δ 7.03 (2H, d, *J* = 8.7 Hz, 9-H), 6.53 (2H, d, *J* = 8.7 Hz, 10-H), 4.27 (2H, s, CH<sub>2</sub> Bn). <sup>13</sup>C NMR (101 MHz, CDCl<sub>3</sub>) δ 147.1 (1C, C Ar), 139.5 (1C, C Ar), 135.7 (1C, C Ar), 127.4 (1C, CH Ar), 125.7 (1C, C Ar), 112.4 (2C, C-10), 47.0 (1C, C-2), 32.9 (1C, CH<sub>2</sub> *c*-Hex), 23.3 (1C, q, *J* = 3.2 Hz, C-4), 22.2 (1C, CH<sub>2</sub> *c*-Hex), 22.1 (1C, CH<sub>2</sub> *c*-Hex).

**(*E*)-*N*-Benzyl-4-[5,5,5-trifluoro-1-(4-methoxyphenyl)pent-2-en-1-yl]aniline, 4at.**

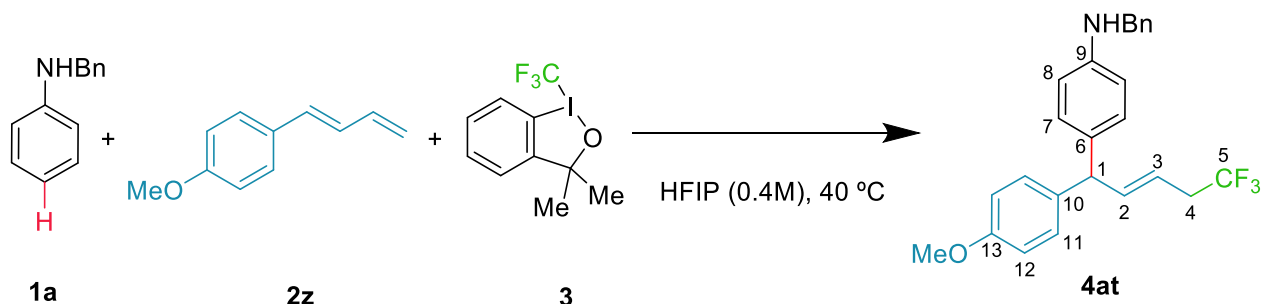

From aniline **1a** (36.6 mg, 0.2 mmol), alkene **2z** (32 mg, 0.2 mmol) and trifluoromethyl reagent **3** (66.0 mg, 0.2 mmol), in 0.5 mL of HFIP, following the general procedure, aniline **4at** was obtained. Chromatographic purification (gradient elution: 0:100 → 15:85 Et<sub>2</sub>O – hexane) gave **4at** (44.9 mg, 55%), as a colourless oil.

Data for **4at**: *R<sub>f</sub>* 0.4 (30% Et<sub>2</sub>O – hexane). <sup>1</sup>H NMR (400 MHz, CDCl<sub>3</sub>) δ 7.39 – 7.26 (5H m, Ar), 7.06 (2H, d, *J* = 8.6 Hz, 11-H), 6.96 (2H, d, *J* = 8.5 Hz, 7-H), 6.83 (2H, d, *J* = 8.7 Hz, 12-H), 6.65 (2H, d, *J* = 8.5 Hz, 8-H), 6.12 (1H, dd, *J* = 15.4 and 7.3 Hz, 2-H), 5.33 (1H, dtd, *J* = 15.4, 7.1 and 1.3 Hz, 3-H), 4.60 (1H, d, *J* = 7.3 Hz, 1-H), 4.30 (2H, s, CH<sub>2</sub> Bn), 3.78 (3H, s, OMe), 2.84 (2H, qd, *J* = 10.6 and 7.2 Hz, 4-H<sub>2</sub>). <sup>13</sup>C NMR (101 MHz, CDCl<sub>3</sub>) δ 158.2 (1C, C Ar), 146.1 (1C, C Ar), 141.2 (1C, C-2), 139.0 (1C, C Ar), 135.7 (1C, C Ar), 132.9 (1C, C Ar), 129.5 (2C, CH Ar), 129.4 (2C, CH Ar), 128.8 (2C, CH Ar), 127.9 (2C, CH Ar), 127.5 (1C, CH Ar), 126.0 (1C, q, *J* = 276.7 Hz, CF<sub>3</sub>), 118.86 (1C, C-3), 113.9 (2C, CH Ar), 113.6 (2C, CH Ar), 55.4 (1C, OMe), 52.3 (1C, C-1), 49.0 (1C, CH<sub>2</sub> Bn), 37.4 (1C, q, *J* = 29.6 Hz, C-4). <sup>19</sup>F NMR (376 MHz, CDCl<sub>3</sub>) δ –66.4 (3F, CF<sub>3</sub>). HRMS (EI): calculated for C<sub>25</sub>H<sub>25</sub>F<sub>3</sub>NO [M+H]<sup>+</sup> requires *m/z* 412.1883, found 412.1885.

**(E)-N-Benzyl-4-[5,5,5-trifluoro-1-(4-methoxyphenyl)-4,4-dimethylpent-2-en-1-yl]aniline, 4au.**

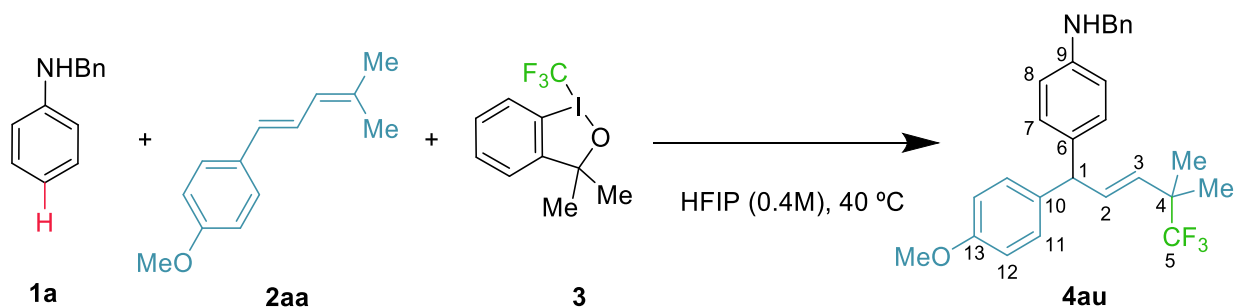

From aniline **1a** (36.7 mg, 0.20 mmol), alkene **2aa** (37.7 mg, 0.20 mmol) and trifluoromethyl reagent **3** (66.0 mg, 0.20 mmol), in 0.5 mL of HFIP, following the general procedure, aniline **4au** was obtained. Chromatographic purification (gradient elution: 0:100 → 5:95 Et<sub>2</sub>O – hexane) gave **4au** (44.5 mg, 52%), as a colourless oil.

Data for **4au**: *R<sub>f</sub>* 0.4 (30% Et<sub>2</sub>O – hexane). <sup>1</sup>H NMR (400 MHz, CDCl<sub>3</sub>) δ 7.43 – 7.28 (5H, m, Ar), 7.07 (2H, d, *J* = 8.7 Hz, 11-H), 6.96 (2H, d, *J* = 8.5 Hz, 7-H), 6.85 (2H, d, *J* = 8.7 Hz, 12-H), 6.62 (2H, d, *J* = 8.5 Hz, 8-H), 6.06 (1H, dd, *J* = 15.7 and 7.5 Hz, 2-H), 5.49 (1H, d, *J* = 15.8 Hz, 3-H), 4.60 (1H, d, *J* = 7.5 Hz, 1-H), 4.32 (2H, s, CH<sub>2</sub> Bn), 3.80 (3H, s, OMe), 1.25 (6H, s, 2 x Me). <sup>13</sup>C NMR (101 MHz, CDCl<sub>3</sub>) δ 158.1 (1C, C Ar), 146.4 (1C, C Ar), 139.4 (1C, C Ar), 136.1 (1C, C Ar), 135.2 (1C, C-3), 133.0 (1C, C Ar), 131.1 (1C, C-2), 129.5 (2C, CH Ar), 129.4 (2C, CH Ar), 128.8 (2C, CH Ar), 128.6 (1C, q, *J* = 282.0 Hz, CF<sub>3</sub>), 127.8 (2C, CH Ar), 127.4 (1C, CH Ar), 113.9 (2C, CH Ar), 113.3 (2C, CH Ar), 55.4 (1C, OMe), 52.2 (1C, C-1), 48.9 (1C, CH<sub>2</sub> Bn), 42.4 (1C, q, *J* = 25.3 Hz, C-4), 21.4 (2C, 2 x Me). <sup>19</sup>F NMR (376 MHz, CDCl<sub>3</sub>) δ -77.9 (3F, CF<sub>3</sub>). HRMS (ESI): calculated for C<sub>27</sub>H<sub>29</sub>F<sub>3</sub>NO [M+H]<sup>+</sup> requires *m/z* 440.2196, found *m/z* 440.2185.

**N-Benzyl-4-methyl-2-[3,3,3-trifluoro-1-(4-methoxyphenyl)propyl]aniline, S10.**

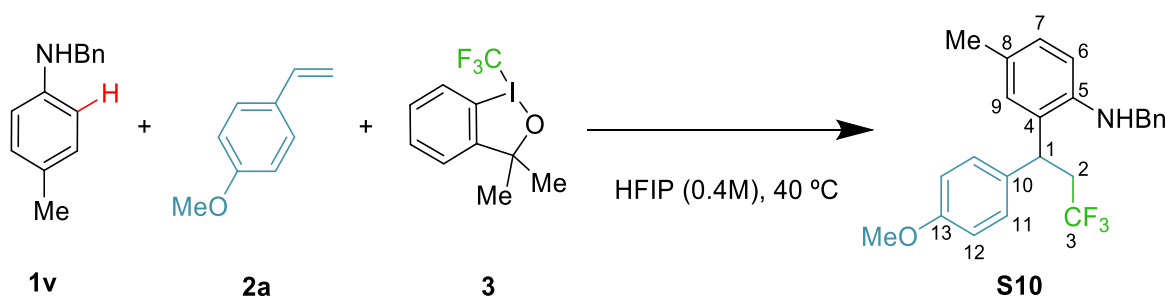

From aniline **1v** (39.5 mg, 0.20 mmol), alkene **2a** (26.8 mg, 0.20 mmol) and trifluoromethyl reagent **3** (66.0 mg, 0.20 mmol), in 0.5 mL of HFIP, following the general procedure, aniline **S10** was obtained. Chromatographic purification (gradient elution: 0:100 → 20:80 Et<sub>2</sub>O – hexane) gave **S10** (21.1 mg, 26%), as a colourless oil.

Data for **S10**:  $R_f$  0.50 (20% Et<sub>2</sub>O – hexane). <sup>1</sup>H NMR (400 MHz, CDCl<sub>3</sub>) δ 7.40 – 7.35 (3H, m, H Ar), 7.26 (2H, d,  $J$  = 8.7 Hz, 11-H), 7.18 (2H, d,  $J$  = 8.0, H Ar), 7.13 (1H, d,  $J$  = 2.0 Hz, 9-H), 7.07 (1H, dd,  $J$  = 8.1 and 1.3 Hz, 7-H), 6.93 (1H, d,  $J$  = 8.7 Hz, 6-H), 6.68 (2H, d,  $J$  = 8.1 Hz, 12-H), 4.42 (1H, br s, 1-H), 4.31 (2H, s, CH<sub>2</sub> Bn), 3.90 (3H, s, OMe), 3.13 – 2.89 (2H, m, 2-H<sub>2</sub>), 2.42 (3H, s, Me). <sup>13</sup>C NMR (101 MHz, CDCl<sub>3</sub>) δ 158.8 (1C, C Ar), 147.3 (1C, C Ar), 142.5 (1C, C Ar), 139.0 (1C, C Ar), 136.1 (1C, C Ar), 133.4 (1C, C Ar), 129.2 (2C, CH Ar), 128.6 (3C, CH Ar), 128.4 (2C, CH Ar), 127.5 (2C, CH Ar), 127.3 (1C, CH Ar), 126.8 (1C, q,  $J$  = 277.5 Hz, CF<sub>3</sub>), 114.4 (2C, CH Ar), 55.4 (1C, OMe), 48.7 (1C, CH<sub>2</sub> Bn), 39.17 (1C, q,  $J$  = 27.1 Hz, C-2), 38.99 (1C, q,  $J$  = 2.9 Hz, C-1) 20.9 (1C, Me). <sup>19</sup>F NMR (376 MHz, CDCl<sub>3</sub>) δ –64.1 (3F, CF<sub>3</sub>).

#### 4.1. Unsuccessful or low yielding substrates

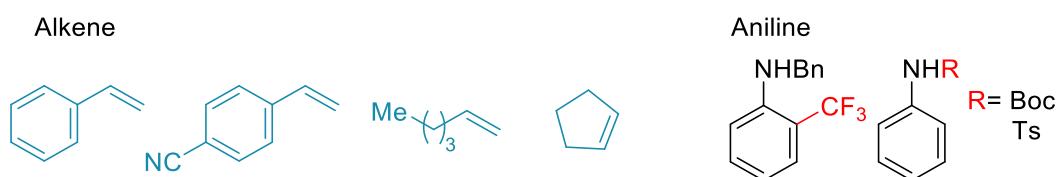

## 5. Derivatization of trifluoromethyl products

### 5.1. General procedure for the synthesis of sulfonamides

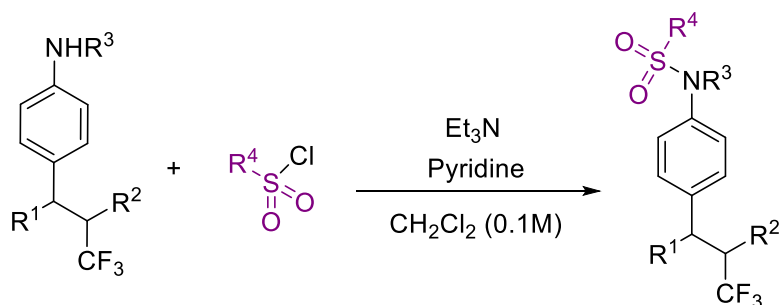

To an oven-dried vial/flask a solution of aniline in CH<sub>2</sub>Cl<sub>2</sub> (0.1 M) was added, followed by triethylamine (2-3 equiv.), pyridine (0-2 equiv.) and sulfonyl chloride (1.2-2.1 equiv.) at 0 °C. The reaction mixture was let warm up to rt and stirred overnight. The reaction mixture was diluted with CH<sub>2</sub>Cl<sub>2</sub>, extracted with water and the organic layers dried over Na<sub>2</sub>SO<sub>4</sub>. The resulting crude was purified by silica gel chromatography using the appropriate mixture of eluents.

***N*-Benzyl-*N*-{4-[(1*R*,2*R*)-6-methoxy-2-(trifluoromethyl)-1,2,3,4-tetrahydronaphthalen-1-yl]phenyl}-2,4-dinitrobenzenesulfonamide, **5**.**

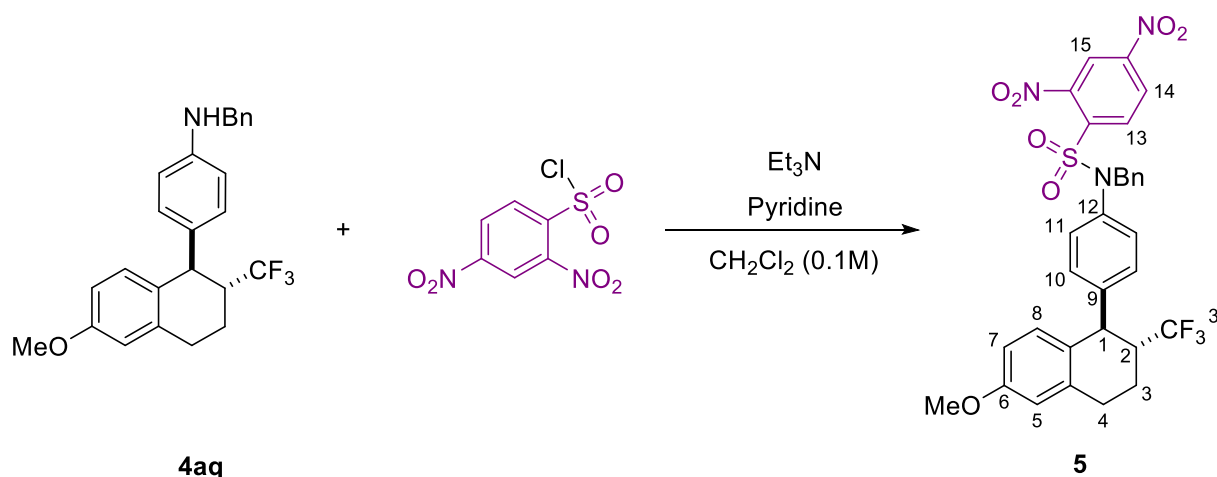

From aniline **4aq** (149.0 mg, 0.362 mmol), triethylamine (101  $\mu\text{L}$ , 0.734 mmol, 2.0 equiv.), pyridine (58.6  $\mu\text{L}$ , 0.734 mmol, 2.0 equiv.) and 2,4-dinitrosulfonyl chloride (145 mg, 0.543 mmol, 1.5 equiv.), in 3.6 mL of dry  $\text{CH}_2\text{Cl}_2$ , following the general procedure, sulfonamide **5** was obtained. Chromatographic purification (gradient elution: 0:100  $\rightarrow$  40:70  $\text{Et}_2\text{O}$  – hexane) gave **5**, as a brown solid. The solid was washed 3 times using a mixture of  $\text{CH}_2\text{Cl}_2$ /pentane to give a white solid (75.1 mg, 32%), that was recrystallized using THF – pentane, to give white crystals for x-ray diffraction.

Data for **5**:  $R_f$  0.2 (40%  $\text{Et}_2\text{O}$  – hexane). **m.p.**: 197  $^\circ\text{C}$  (10% THF – pentane).  **$^1\text{H}$  NMR (400 MHz,  $\text{CDCl}_3$ )**  $\delta$  8.47 (1H, d,  $J = 2.2$  Hz, 15-H), 8.22 (1H, dd,  $J = 8.7$  and 2.2 Hz, 14-H), 7.66 (1H, d,  $J = 8.7$  Hz, 13-H), 7.31 – 7.18 (5H, m, Ar), 6.97 (4H, br s, 10-H and 11-H), 6.63 (1H, d,  $J = 2.7$  Hz, 5-H), 6.60 (1H, dd,  $J = 8.5$  and 2.7 Hz, 7-H), 6.51 (1H, d,  $J = 8.5$  Hz, 8-H), 4.98 (1H, d,  $J = 14.7$  Hz,  $\text{CH}_A$  Bn), 4.92 (1H, d,  $J = 14.8$  Hz,  $\text{CH}_B$  Bn), 4.13 (1H, d,  $J = 8.6$  Hz, 1-H), 3.77 (3H, s, OMe), 2.90 (2H, t,  $J = 6.4$  Hz, 4- $\text{H}_2$ ), 2.64 – 2.52 (1H, m, 2-H), 2.23 – 2.11 (1H, m, 3- $\text{H}_A$ ), 1.91 – 1.77 (1H, m, 3- $\text{H}_B$ ).  **$^{13}\text{C}$  NMR (101 MHz,  $\text{CDCl}_3$ )**  $\delta$  158.2 (1C, C Ar), 149.8 (1C, C Ar), 148.1 (1C, C Ar), 146.7 (1C, C Ar), 137.8 (1C, C Ar), 137.2 (1C, C Ar), 135.6 (1C, C Ar), 135.5 (1C, C Ar), 134.0 (1C, C-13), 131.2 (1C, C-8), 130.2 (2C, CH Ar), 129.9 (2C, CH Ar), 129.0 (1C, C Ar), 128.9 (2C, CH Ar), 128.7 (2C, CH Ar), 128.2 (1C, CH Ar), 125.4 (1C, C-14), 119.5 (1C, C-15), 113.1 (1C, C-5), 113.0 (1C, C-7), 57.1 (1C,  $\text{CH}_2$  Bn), 55.4 (1C, OMe), 47.1 (1C,  $J = 25.0$  Hz, C-2), 44.2 (1C, C-1), 28.3 (1C, C-4), 21.8 (1C, C-3).  **$^{19}\text{F}$  NMR (376 MHz,  $\text{CDCl}_3$ )**  $\delta$  –69.34 (3F,  $\text{CF}_3$ ). **HMRS (ESI)**: calculated for  $\text{C}_{31}\text{H}_{30}\text{F}_3\text{N}_4\text{O}_7\text{S}$  [ $\text{M}+\text{NH}_4$ ] $^+$  requires  $m/z$  659.1782, found  $m/z$  659.1783.

***N*-Benzyl-4-methyl-*N*-{4-[3,3,3-trifluoro-1-(4-methoxyphenyl)propyl]phenyl}benzenesulfonamide, **S11**.**

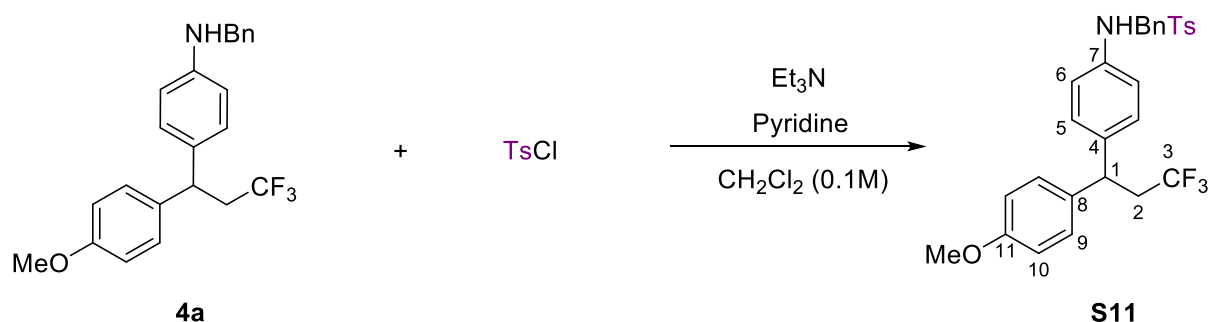

From aniline **4a** (500.0 mg, 1.297 mmol), triethylamine (542  $\mu$ L, 3.892 mmol, 3.0 equiv.) and *para*-toluenesulfonyl chloride (519.3 mg, 2.724 mmol, 2.1 equiv.) in 13 mL of dry  $\text{CH}_2\text{Cl}_2$ , following the general procedure, sulfonamide **S11** was obtained. Chromatographic purification (gradient elution: 0:100  $\rightarrow$  30:70  $\text{Et}_2\text{O}$  – hexane) gave **S11**, as a colourless oil.

Data for **S11**:  $R_f$  0.1 (30%  $\text{EtOAc}$  – hexane).  $^1\text{H NMR}$  (400 MHz,  $\text{CDCl}_3$ )  $\delta$  7.49 (2H, d,  $J = 8.3$  Hz, Ar), 7.25 (2H, d,  $J = 8.4$  Hz, Ar), 7.22 – 7.15 (5H, m, Ar), 7.07 (2H, d,  $J = 8.8$  Hz, 10-H), 7.05 (2H, d,  $J = 8.8$  Hz, 5-H), 6.91 (2H, d,  $J = 8.5$  Hz, 9-H), 6.82 (2H, d,  $J = 8.7$  Hz, 6-H), 4.68 (2H, s,  $\text{CH}_2$  Bn), 4.19 (1H, t,  $J = 7.4$  Hz, 1-H), 3.78 (3H, s, OMe), 2.84 – 2.69 (2H, m, 2- $\text{H}_2$ ), 2.43 (3H, s, Me).  $^{13}\text{C NMR}$  (101 MHz,  $\text{CDCl}_3$ )  $\delta$  158.6 (1C, C Ar), 143.6 (1C, C Ar), 142.8 (1C, C Ar), 137.8 (1C, C Ar), 136.1 (1C, C Ar), 135.8 (1C, C Ar), 134.3 (1C, C Ar), 129.6 (2C, CH Ar), 129.2 (2C, CH Ar), 128.7 (2C, CH Ar), 128.6 (2C, CH Ar), 128.5 (2C, CH Ar), 128.1 (2C, CH Ar), 127.8 (2C, CH Ar), 127.7 (1C, CH Ar), 126.4 (1C, q,  $J = 277.8$  Hz,  $\text{CF}_3$ ), 114.2 (2C, CH Ar), 55.4 (1C, OMe), 54.8 (1C,  $\text{CH}_2$  Bn), 43.9 (1C, C-1), 34.0 (1C, q,  $J = 27.3$  Hz, C-2), 21.7 (1C, Me).  $^{19}\text{F NMR}$  (376 MHz,  $\text{CDCl}_3$ )  $\delta$  –63.63 (3F,  $\text{CF}_3$ ).

**4-Methyl-*N*-tosyl-*N*-{4-[5,5,5-trifluoro-1-(4-methoxyphenyl)pentyl]phenyl}benzenesulfonamide, **S12**.**

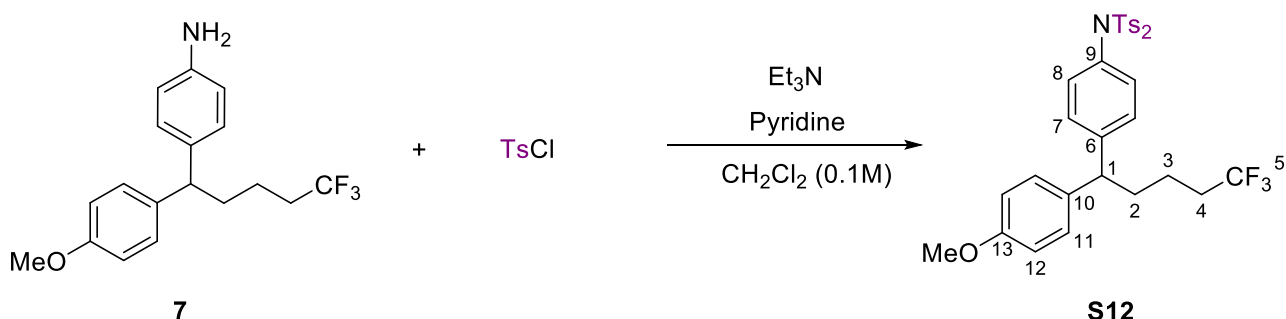

From aniline **7** (57.0 mg, 0.176 mmol), triethylamine (75  $\mu$ L, 0.528 mmol, 3.0 equiv.), and *para*-toluenesulfonyl chloride (75 mg, 0.388 mmol, 2.2 equiv.) in dry  $\text{CH}_2\text{Cl}_2$  (0.1M), following the general procedure, sulfonamide **S12** was obtained. Chromatographic purification (gradient elution: 0:100  $\rightarrow$  80:20  $\text{EtOAc}$  – hexane) gave **S12** (85 mg, 76%), as a colourless oil.

Data for **S12**:  $R_f$  0.35 (50% EtOAc – hexane).  $^1\text{H NMR}$  (300 MHz,  $\text{CDCl}_3$ )  $\delta$  7.79 (4H, d,  $J = 8.1$  Hz, Ar), 7.31 (4H, d,  $J = 8.1$  Hz, Ar), 7.18 (2H, d,  $J = 8.3$  Hz, 11-H), 7.13 (2H, d,  $J = 8.6$  Hz, 7-H), 6.94 (2H, d,  $J = 8.2$  Hz, 12-H), 6.86 (2H, d,  $J = 8.6$  Hz, 8-H), 3.86 (1H, t,  $J = 7.6$  Hz, 1-H), 3.80 (3H, s, OMe), 2.20 – 1.50 (6H, m, 2- $\text{H}_2$ , 3- $\text{H}_2$  and 4- $\text{H}_2$ ). **HMRS** (ESI): calculated for  $\text{C}_{32}\text{H}_{36}\text{F}_3\text{N}_2\text{O}_5\text{S}_2$   $[\text{M}+\text{NH}_4]^+$  requires  $m/z$  649.2013, found  $m/z$  649.2016.

## 5.2. General procedure for hydrogenation

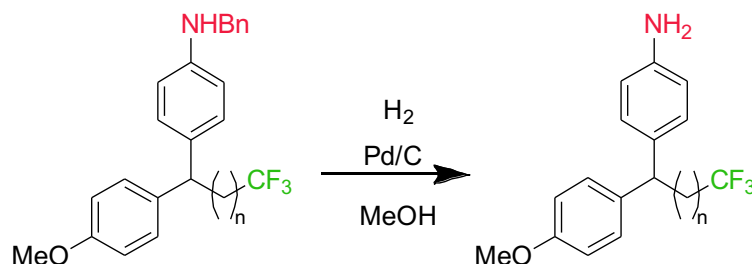

To an oven-dried vial, *N*-Benzyl aniline (1 equiv.) and 10 mol %  $\text{Pd/C}$  (0.1 equiv.) were added. Then,  $\text{MeOH}$  was added and the reaction mixture was kept under hydrogen for the specified time. The reaction mixture was diluted with dichloromethane, filtered through a pad of celite and evaporated under reduced pressure. The crude was purified by silica gel chromatography using the appropriate mixture of eluents to give the corresponding free anilines.

### 4-[3,3,3-Trifluoro-1-(4-methoxyphenyl)propyl]aniline, **4c**.

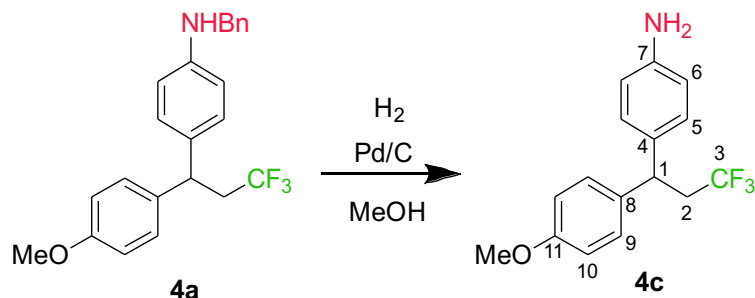

From *N*-Benzyl aniline **4a** (30 mg, 1 equiv., 0.08 mmol) and  $\text{Pd/C}$  (8.3 mg, 0.1 equiv., 0.008 mmol) in 3.9 mL of  $\text{MeOH}$  under 4 bar hydrogen pressure, following the general procedure, aniline **4c** was obtained. Chromatographic purification (gradient elution: 0:100  $\rightarrow$  50:50 EtOAc – hexane) gave **4c** (16 mg, 70%) as a colourless oil. Spectroscopy data matches with those previously reported.

### 4-[5,5,5-Trifluoro-1-(4-methoxyphenyl)pentyl]aniline, **7**.

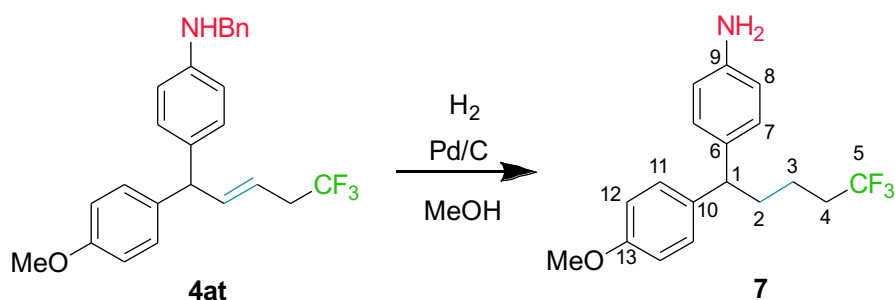

From *N*-Benzyl aniline **4at** (180 mg, 1 equiv., 0.437 mmol) and Pd/C (48 mg, 0.1 equiv., 0.0437 mmol) in 2.2 mL of MeOH under hydrogen balloon pressure, following the general procedure, aniline **7** was obtained. Chromatographic purification (gradient elution: 0:100 → 30:70 EtOAc – hexane) gave **7** (101 mg, 71%) as a colourless oil.

Data for **7**:  $R_f$  0.2 (30% EtOAc – hexane).  $^1\text{H NMR}$  (400 MHz,  $\text{CDCl}_3$ )  $\delta$  7.13 (2H, d,  $J = 8.7$  Hz, 11-H), 7.01 (2H, d,  $J = 8.4$  Hz, 7-H), 6.83 (2H, d,  $J = 8.7$  Hz, 12-H), 6.65 (2H, d,  $J = 8.4$  Hz, 8-H), 3.78 (3H, s, OMe), 3.83 – 3.70 (1H, m, 1-H), 2.16 – 1.97 (4H, m, 2-H<sub>2</sub> and 4-H<sub>2</sub>), 1.62 – 1.44 (2H, m, 3-H<sub>2</sub>).  $^{13}\text{C NMR}$  (101 MHz,  $\text{CDCl}_3$ )  $\delta$  158.0 (1C, C Ar), 144.1 (1C, C Ar), 137.3 (1C, C Ar), 135.4 (1C, C Ar), 128.63 (2C, C-11), 128.58 (2C, C-7), 127.3 (1C, q,  $J = 276.7$  Hz,  $\text{CF}_3$ ), 115.7 (2C, C-8), 113.98 (2C, C-12), 55.33 (1C,  $\text{CH}_2$  Bn), 49.48 (1C, C-1), 35.15 (1C, C-2), 33.79 (1C, q,  $J = 28.4$  Hz, C-4), 20.68 (1C, q,  $J = 2.9$  Hz, C-3).  $^{19}\text{F NMR}$  (376 MHz,  $\text{CDCl}_3$ )  $\delta$  –66.12 (3F,  $\text{CF}_3$ ). **HRMS** (ESI): calculated for  $\text{C}_{18}\text{H}_{21}\text{F}_3\text{NO}$   $[\text{M}+\text{H}]^+$  requires  $m/z$  324.1570, found  $m/z$  324.1558.

### 5.3. General procedure for Ru-catalyzed oxidation

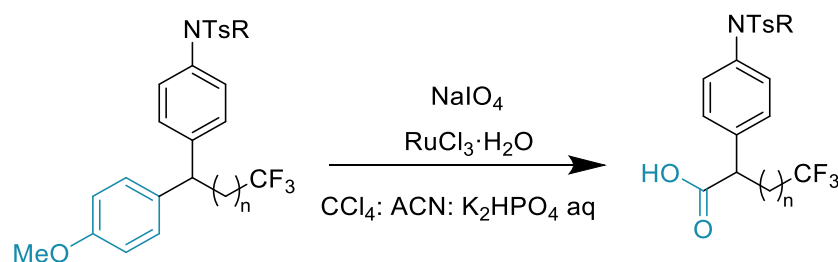

To a cold (0 °C) solution of *para*-methoxyphenyl (PMP) derivative (1 equiv.) in 40.0 mL/mmol of a 2:2:3 mixture of  $\text{CCl}_4$  : MeCN :  $\text{K}_2\text{HPO}_4$  aq. (0.2M),  $\text{NaIO}_4$  (20.0 equiv.) was added in one portion. The mixture was stirred at that temperature for 15 min and  $\text{RuCl}_3 \cdot \text{H}_2\text{O}$  (30 mol %) was added in one portion. The mixture was warmed up to room temperature. The reaction was monitored by TLC until completion, diluted with  $\text{Et}_2\text{O}$ , and  $\text{H}_2\text{O}$  and extracted with  $\text{Et}_2\text{O}$ . The water layer was acidified until pH 1 using 1M HCl aq. and extracted with  $\text{Et}_2\text{O}$ . The combined organic layers were dried using  $\text{Na}_2\text{SO}_4$ , filtered and the solvent was evaporated under reduced pressure to give the corresponding carboxylic acid.

### 2-{4-[(*N*-Benzyl-4-methylphenyl)sulfonamido]phenyl}-4,4,4-trifluorobutanoic acid, **6**.

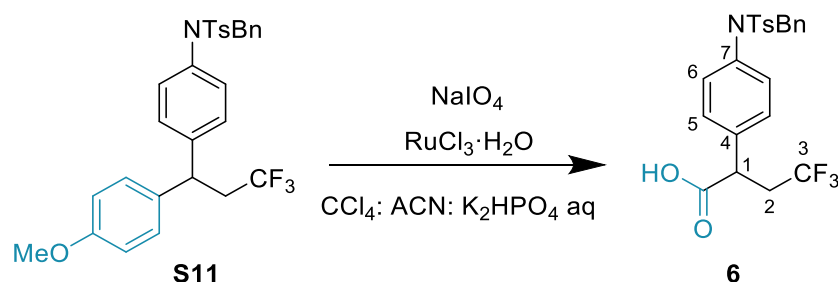

From aniline **S11** (54 mg, 0.100 mmol), NaIO<sub>4</sub> (460 mg, 2.0 mmol) and RuCl<sub>3</sub>·H<sub>2</sub>O (6.8 mg, 0.030 mmol) in 4 mL of the appropriate mixture of solvents, following the general procedure, carboxylic acid **6** was obtained. Chromatographic purification (gradient elution: 30:70 → 70:30 EtOAc – hexane) gave **6** (29.1 mg, 61%) as a white foam.

Data for **6**: *R<sub>f</sub>* 0.3 (70% EtOAc – hexane). <sup>1</sup>H NMR (400 MHz, CDCl<sub>3</sub>) δ 7.60 (2H, d, *J* = 8.3 Hz, Ar), 7.35 (2H, d, *J* = 8.8 Hz, Ar), 7.31 – 7.26 (5H, m, Ar), 7.24 (2H, d, *J* = 8.5 Hz, 5-H), 7.07 (2H, d, *J* = 8.5 Hz, 6-H), 4.78 (2H, s, CH<sub>2</sub> Bn), 3.92 (1H, dd, *J* = 8.6 and 5.4 Hz, 1-H), 3.08 (1H, dqd *J* = 15.0, 10.3 and 8.5 Hz, 2-H<sub>A</sub>), 2.52 (3H, s, Me), 2.60 – 2.42 (1H, m, 2-H<sub>B</sub>). <sup>13</sup>C NMR (101 MHz, CDCl<sub>3</sub>) δ 175.5 (1C, C=O), 143.8 (1C, C Ar), 139.3 (1C, C Ar), 135.89 (1C, C Ar), 135.87 (1C, C Ar), 135.6 (1C, C Ar), 129.7 (2C, CH Ar), 129.5 (2C, CH Ar), 128.5 (5C, CH Ar), 128.4 (2C, CH Ar), 127.8 (2C, CH Ar), 125.9 (1C, q, *J* = 276.9 Hz, CF<sub>3</sub>), 54.7 (1C, CH<sub>2</sub> Bn), 44.7 (1C, C-1), 37.2 (1C, q, *J* = 29.0 Hz, C-2), 21.7 (1C, Me). <sup>19</sup>F NMR (376 MHz, CDCl<sub>3</sub>) δ –65.2 (3F, CF<sub>3</sub>). HRMS (ESI): calculated for C<sub>24</sub>H<sub>22</sub>F<sub>3</sub>NO<sub>4</sub>S [M+H]<sup>+</sup> requires *m/z* 477.1217, found *m/z* 478.1278.

#### 6,6,6-Trifluoro-2-[4-[(4-methyl-*N*-tosylphenyl)sulfonamido]phenyl]hexanoic acid, **8**.

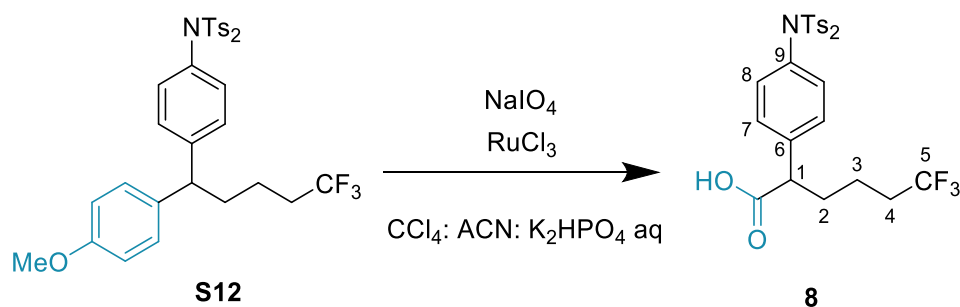

From aniline **S12** (22.7 mg, 0.036 mmol), NaIO<sub>4</sub> (154 mg, 0.719 mmol) and RuCl<sub>3</sub>·H<sub>2</sub>O (2.4 mg, 0.013 mmol) in 1.44 mL of the appropriate mixture of solvents, following the general procedure, carboxylic acid **8** was obtained. Chromatography purification (gradient elution: 50:50 → 100:0 EtOAc – hexane) gave **8** (14.8 mg, 72%) as a colourless oil.

Data for **8**: *R<sub>f</sub>* 0.1 (70% EtOAc – hexane). <sup>1</sup>H NMR (400 MHz, CDCl<sub>3</sub>) δ 7.79 (4H, d, *J* = 8.4 Hz, Ar), 7.32 (4H, d, *J* = 8.2 Hz, Ar), 7.31 (2H, d, *J* = 8.5 Hz, 7-H), 7.01 (2H, d, *J* = 8.4 Hz, 8-H), 3.60 (1H, t, *J* = 7.6 Hz, 1-H), 2.46 (6H, s, 2 x Me), 2.23 – 2.03 (3H, m, 2-H<sub>A</sub> and 4-H<sub>2</sub>), 1.85 (1H, m, 2-H<sub>B</sub>), 1.68 – 1.46 (2H, m, 3-H<sub>2</sub>). <sup>13</sup>C NMR (101 MHz, CDCl<sub>3</sub>) δ 177.5 (1C, C=O), 145.3 (2C, C Ar), 140.0 (1C, C Ar), 136.7 (2C, C Ar), 134.1 (1C, C Ar), 132.1 (2C, C-7), 129.8 (4C, CH Ar), 128.9 (2C, C-6), 128.7 (4C, CH Ar), 127.0 (1, q, *J* = 276.3 Hz, CF<sub>3</sub>), 50.9 (1C, C-1), 33.6 (1C, q, *J* = 28.6 Hz, C-4), 32.3 (1C, C-2), 21.9 (2C, 2 x Me), 20.3 (1C, q, *J* = 3.0 Hz, C-3). <sup>19</sup>F NMR (376 MHz, CDCl<sub>3</sub>) δ –66.2 (3F, CF<sub>3</sub>). HRMS (ESI): calculated for C<sub>26</sub>H<sub>30</sub>F<sub>3</sub>N<sub>2</sub>O<sub>6</sub>S<sub>2</sub> [M+NH<sub>4</sub>]<sup>+</sup> requires *m/z* 587.1492, found *m/z* 587.1480.



## 6. Selective derivatization of bioactive molecules

### 2-[(2,3-Dimethylphenyl)amino]-5-(3,3,3-trifluoro-1,1-diphenylpropyl)benzoic acid, **4av**.

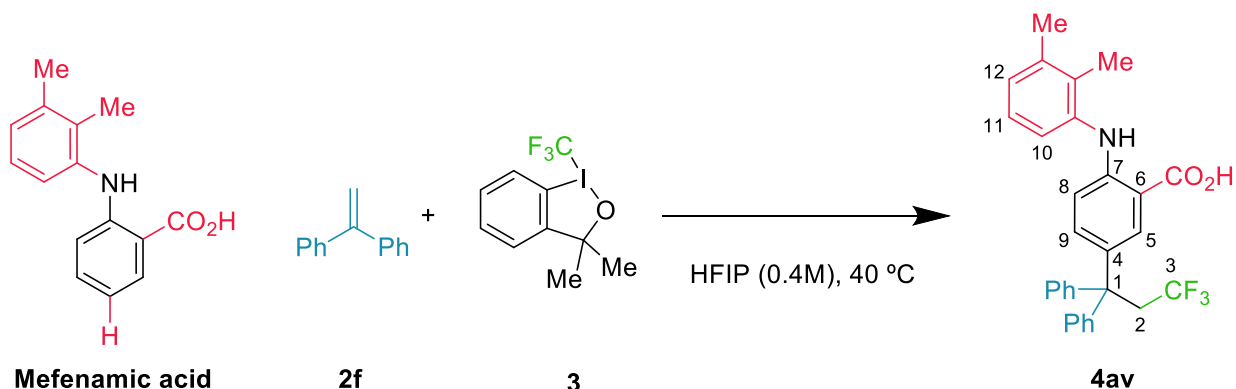

From Mefenamic acid (38.3 mg, 0.20 mmol), alkene **2f** (72.2 mg, 0.40 mmol) and trifluoromethyl reagent **3** (132.0 mg, 0.40 mmol), in 0.5 mL of HFIP, following the general procedure, aniline **4av** was obtained. Chromatographic purification (gradient elution: 0:100  $\rightarrow$  50:50 EtOAc – hexane) gave **4av** (39 mg, 40%), as a brown oil.

Data for **4av**:  $R_f$  0.25 (50% EtOAc – hexane).  $^1\text{H NMR}$  (400 MHz,  $\text{CDCl}_3$ )  $\delta$  9.08 (1H, s, NH), 8.00 (1H, d,  $J = 2.6$  Hz, 5-H), 7.35 – 7.27 (8H, m, Ar), 7.23 – 7.19 (2H, m, Ar), 7.17 (1H, dd,  $J = 9.2$  and 2.7 Hz, 9-H), 7.13 (1H, dd,  $J = 7.2$  and 1.6 Hz, 12-H), 7.09 (1H, t,  $J = 7.6$  Hz, 11-H), 7.03 (1H, dd,  $J = 7.4$  and 1.7 Hz, 10-H) 6.65 (1H, d,  $J = 9.0$  Hz, 8-H), 3.53 (2H, q,  $J = 10.5$  Hz, 2- $\text{H}_2$ ), 2.32 (3H, s, Me), 2.18 (3H, s, Me).  $^{13}\text{C NMR}$  (101 MHz,  $\text{CDCl}_3$ )  $\delta$  173.8 (1C, C=O), 149.0 (1C, C-7), 145.4 (2C, C Ar), 138.4 (1C, C Ar), 138.3 (1C, C Ar), 136.7 (1C, C-9), 132.9 (1C, C Ar), 132.8 (1C, C-4), 131.9 (1C, C-5), 128.9 (4C, CH Ar), 128.2 (4C, CH Ar), 127.4 (1C, C-10), 126.6 (2C, CH Ar), 126.12 (1C, C-11), 126.10 (1C, q,  $J = 279.6$  Hz,  $\text{CF}_3$ ), 123.8 (1C, C-12), 113.7 (1C, C-8), 108.6 (1C, C-6), 53.4 (1C, C-1), 44.0 (1C, q,  $J = 26.6$  Hz, C-2), 20.7 (1C, Me), 14.3 (1C, Me).  $^{19}\text{F NMR}$  (376 MHz,  $\text{CDCl}_3$ )  $\delta$  -56.1 (3F,  $\text{CF}_3$ ). HRMS (ESI): calculated for  $\text{C}_{30}\text{H}_{27}\text{F}_3\text{NO}_2$   $[\text{M}+\text{H}]^+$  requires  $m/z$  490.1989, found  $m/z$  490.1990.

### 5-[1-(4-Bromophenyl)-3,3,3-trifluoro-1-phenylpropyl]-2-[(2,3-dimethylphenyl)amino]benzoic acid, **4aw**.

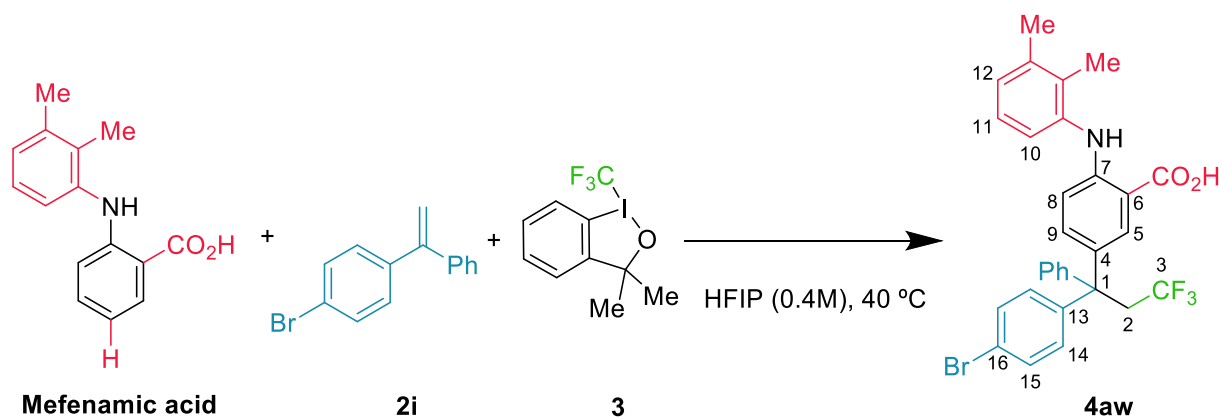

From Mefenamic acid (48.3 mg, 0.20 mmol), alkene **2i** (104 mg, 0.40 mmol) and trifluoromethyl reagent **3** (132.0 mg, 0.40 mmol), in 0.5 mL of HFIP, following the general procedure, aniline **4aw** was obtained. Chromatographic purification (gradient elution: 0:100 → 20:80 EtOAc–hexane) gave **4aw** (49 mg, 43%), as a yellow oil.

Data for **4aw**:  $R_f$  0.3 (50% EtOAc – hexane).  $^1\text{H NMR}$  (400 MHz,  $\text{CDCl}_3$ )  $\delta$  9.09 (1H, s, NH), 7.97 (1H, d,  $J = 2.6$  Hz, 5-H), 7.41 (2H, d,  $J = 8.7$  Hz, 15-H), 7.33 – 7.25 (4H, m, Ar), 7.24 – 7.20 (1H, m, Ar), 7.18 (2H, d,  $J = 8.7$  Hz, 14-H), 7.14 – 7.08 (3H, m, Ar) 7.04 (1H, dd,  $J = 6.7$  and 1.8 Hz, 10-H), 6.64 (1H, d,  $J = 9.1$  Hz, 8-H), 3.49 (2H, q,  $J = 10.4$  Hz, 2- $\text{H}_2$ ), 2.33 (3H, s, Me), 2.18 (3H, s, Me).  $^{13}\text{C NMR}$  (101 MHz,  $\text{CDCl}_3$ )  $\delta$  173.8 (1C, C=O), 149.1 (1C, C-7), 145.0 (1C, C Ar), 144.4 (1C, C-13), 138.5 (1C, C Ar), 138.2 (1C, C Ar), 136.4 (1C, C-9), 133.0 (1C, C Ar), 132.2 (1C, C-4), 131.8 (1C, C-5), 131.3 (2C, C-15), 130.8 (2C, C-14), 128.7 (2C, CH Ar), 128.3 (2, CH Ar), 127.5 (1C, C-10), 126.9 (1C, CH Ar), 126.2 (1C, C-11), 125.9 (1C, q,  $J = 279.4$  Hz,  $\text{CF}_3$ ), 123.9 (1C, C-12), 120.8 (1C, C-16), 113.9 (1C, C-8), 108.6 (1C, C-6), 53.1 (1C, C-1), 43.9 (1C, q,  $J = 26.4$  Hz, C-2), 20.7 (1C, Me), 14.3 (1C, Me).  $^{19}\text{F NMR}$  (376 MHz,  $\text{CDCl}_3$ )  $\delta$  –56.1 (3F,  $\text{CF}_3$ ). HRMS (ESI): calculated for  $\text{C}_{30}\text{H}_{26}\text{BrF}_3\text{NO}_2$   $[\text{M}+\text{H}]^+$  requires  $m/z$  568.1094, found  $m/z$  568.1103.

**5-[1-(4-Acetoxyphenyl)-3,3,3-trifluoro-1-phenylpropyl]-2-[(2,3-dimethylphenyl)amino]benzoic acid, 4ax.**

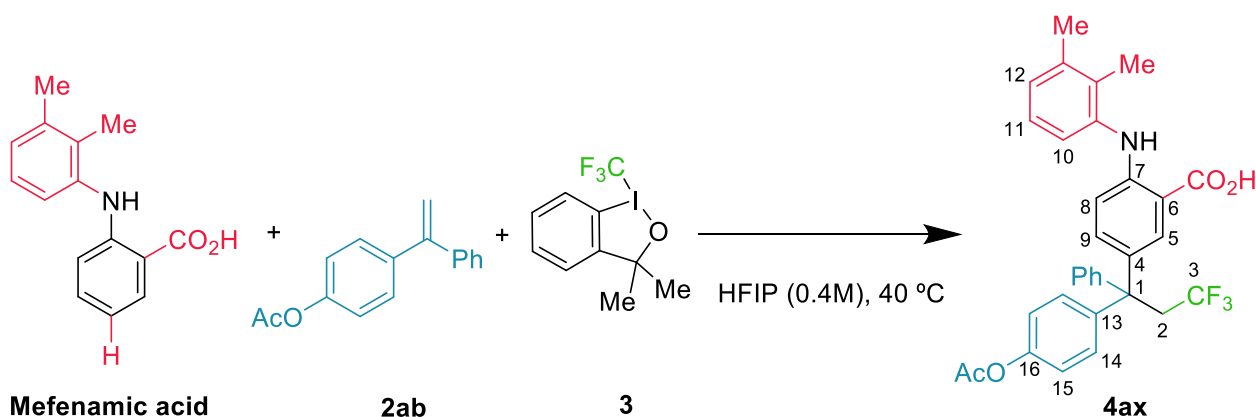

From Mefenamic acid (48.3 mg, 0.20 mmol), alkene **2ab** (95.4 mg, 0.40 mmol) and trifluoromethyl reagent **3** (132.0 mg, 0.40 mmol), in 0.5 mL of HFIP, following the general procedure, aniline **4ax** was obtained. Chromatographic purification (gradient elution: 0:100 → 50:50 EtOAc–hexane) gave **4ax** (37.1 mg, 35%), as a yellow oil.

Data for **4ax**:  $R_f$  0.15 (50% EtOAc – hexane).  $^1\text{H NMR}$  (400 MHz,  $\text{CDCl}_3$ )  $\delta$  9.11 (1H, s, NH), 8.00 (1H, d,  $J = 2.6$  Hz, 5-H), 7.34 – 7.29 (6H, m, H Ar), 7.26 – 7.20 (1H, m, Ar), 7.16 – 7.09 (1H, m, Ar), 7.14 (1H, dd,  $J = 9.0$  and 2.7 Hz, 9-H), 7.09 (1H, t,  $J = 7.5$  Hz, 11-H), 7.06 – 7.01 (1H, m, Ar), 7.02 (2H, d,  $J = 8.8$  Hz, 14-H), 6.66 (1H, d,  $J = 9.1$  Hz, 8-H), 3.53 (2H, q,  $J = 10.4$  Hz, 2- $\text{H}_2$ ), 2.34 (3H, s, Me), 2.30 (3H, s, Me OAc), 2.20 (3H, s, Me).  $^{13}\text{C NMR}$  (101 MHz,  $\text{CDCl}_3$ )  $\delta$  173.5 (1C,

C=O), 169.4 (1C, C=O Ac), 149.2 (1C, C-16), 149.0 (1C, C-7), 145.2 (1C, C Ar), 142.9 (1C, C Ar), 138.4 (1C, C Ar), 138.3 (1C, C Ar), 136.5 (1C, C-9), 132.9 (1C, C Ar), 132.5 (1C, C-4), 131.7 (1C, C-5), 130.1 (2C, CH Ar), 128.9 (2C, CH Ar), 128.3 (2C, CH Ar), 127.4 (1C, C-10), 126.8 (1C, CH Ar), 126.1 (1C, C-11), 126.0 (1C, q,  $J = 279.3$  Hz, CF<sub>3</sub>), 123.8 (1C, C-12), 121.1 (2C, C-14), 113.8 (1C, C-8), 108.5 (1C, C-6), 53.1 (1C, C-1), 44.1 (1C, q,  $J = 26.4$  Hz, C-2), 21.3 (1C, Me OAc), 20.7 (1C, Me), 14.3 (1C, Me). **<sup>19</sup>F NMR (376 MHz, CDCl<sub>3</sub>)**  $\delta$  -56.1 (3F, CF<sub>3</sub>). **HRMS (ESI):** calculated for C<sub>32</sub>H<sub>29</sub>F<sub>3</sub>NO<sub>4</sub> [M+H]<sup>+</sup> requires  $m/z$  548.2044, found  $m/z$  548.2041.

## 7. Sequential trifluoromethylarylation and hydroarylation of quinolines.

*tert*-Butyl 4-[4-(benzylamino)phenyl]-7-methoxy-3-(trifluoromethyl)-3,4-dihydroquinoline-1(2H)-carboxylate, **10**.

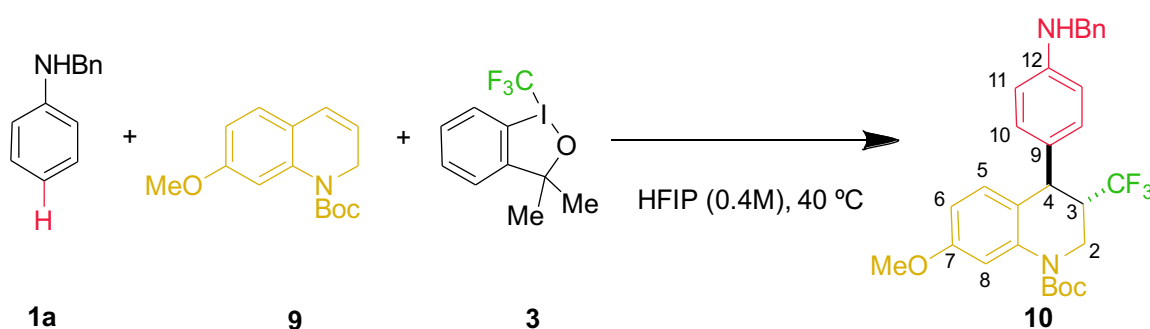

From aniline **1a** (34.8 mg, 0.19 mmol), dihydroquinoline **9** (49.7 mg, 0.19 mmol) and trifluoromethyl reagent **3** (62.7 mg, 0.19 mmol), in 0.5 mL of HFIP, following the general procedure, aniline **10** was obtained. Chromatographic purification (gradient elution: 0:100 → 50:50 Et<sub>2</sub>O – hexane) gave **10** (38 mg, 40%), as a colourless oil.

Data for **10**: *R<sub>f</sub>* 0.2 (30% Et<sub>2</sub>O – hexane). **<sup>1</sup>H NMR (400 MHz, CDCl<sub>3</sub>)**  $\delta$  7.43 – 7.27 (5H, m, Ar), 7.22 (1H, d,  $J = 2.5$  Hz, 8-H), 6.87 (2H, d,  $J = 8.5$  Hz, 10-H), 6.83 (1H, dd,  $J = 8.6$  and 0.8 Hz, 6-H), 6.58 (1H, d,  $J = 8.7$  Hz, 5-H), 6.57 (2H, d,  $J = 8.5$  Hz, 11-H), 4.29 (2H, s, CH<sub>2</sub> Bn), 4.17 (1H, d,  $J = 5.5$  Hz, 4-H), 4.03 (1H, dd,  $J = 13.6$  and 4.4 Hz, 2-H<sub>A</sub>), 3.85 (1H, dd,  $J = 13.7$  and 7.3 Hz, 2-H<sub>B</sub>), 3.79 (3H, s, OMe), 2.85 – 2.70 (1H, m, 3-H), 1.55 (9H, s, 3 x Me Boc). **<sup>13</sup>C NMR (101 MHz, CDCl<sub>3</sub>)**  $\delta$  157.9 (1C, C=O Boc), 153.3 (1C, C Ar), 146.8 (1C, C Ar), 139.4 (1C, C Ar), 139.2 (1C, C Ar), 134.5 (1C, C Ar), 131.0 (1C, C-5), 129.2 (2C, CH Ar), 128.8 (2C, CH Ar), 127.8 (2C, CH Ar), 127.5 (1C, CH Ar), 126.94 (1C, q,  $J = 280.8$  Hz, CF<sub>3</sub>), 122.9 (1C, C Ar), 113.4 (2C, C-11), 111.7 (1C, C-6), 108.8 (1C, C-8), 81.6 (1C, C *t*-Bu Boc), 55.5 (1C, OMe), 48.7 (1C, CH<sub>2</sub> Bn), 47.3 (1C, q,  $J = 24.8$  Hz, C-3), 41.5 (1C, C-2), 41.4 (1C, C-4), 28.4 (3C, 3 x Me Boc). **<sup>19</sup>F NMR (376 MHz, CDCl<sub>3</sub>)**  $\delta$  -70.1 (3F, CF<sub>3</sub>). **HMRS (ESI):** calculated for C<sub>29</sub>H<sub>32</sub>F<sub>3</sub>N<sub>2</sub>O<sub>3</sub> [M+H]<sup>+</sup> requires  $m/z$  513.2360, found  $m/z$  513.2358.

***N*-Benzyl-4-[(3*S*,4*R*)-7-methoxy-3-(trifluoromethyl)-1,2,3,4-tetrahydroquinolin-4-yl]aniline, **S13**.**

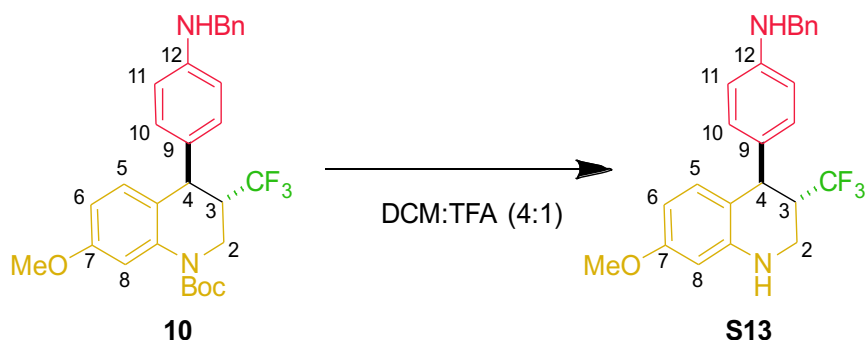

To a stirring solution of aniline **10** (129 mg, 0.25 mmol) in dichloromethane (1 mL), trifluoroacetic acid (252  $\mu$ m) was added, and the reaction mixture stirred for 30 min and checked by TLC. The reaction mixture was then evaporated under reduced pressure and aniline **S13** was obtained. Chromatographic purification (gradient elution: 20:80  $\rightarrow$  50:50 Et<sub>2</sub>O – hexane) gave **S13** (100 mg, 96%), as a yellowish foam.

Data for **S13**:  $R_f$  0.15 (40% Et<sub>2</sub>O – hexane). <sup>1</sup>H NMR (300 MHz, CDCl<sub>3</sub>)  $\delta$  7.26 (5H, s, Ar), 7.08 (2H, d,  $J$  = 8.9 Hz, Ar), 7.03 (2H, d,  $J$  = 9.1 Hz, Ar), 6.55 (1H, d,  $J$  = 8.5 Hz, 5-H), 6.22 (1H, dt,  $J$  = 8.6, 2.3 Hz, 6-H), 6.16 (1H, d,  $J$  = 2.4 Hz, 8-H), 4.27 (2H, s, CH<sub>2</sub> Bn), 4.22 (1H, d,  $J$  = 6.6 Hz, 4-H), 3.73 (3H, s, OMe), 3.39 (2H, m,  $J$  = 10.2 and 5.5 Hz, 2-H<sub>2</sub>), 2.86 – 2.62 (1H, m, 3-H).

***N*-Benzyl-4-[(3*S*,4*R*)-7-methoxy-6-(2-phenylpropan-2-yl)-3-(trifluoromethyl)-1,2,3,4-tetrahydroquinolin-4-yl]aniline, **11**.**

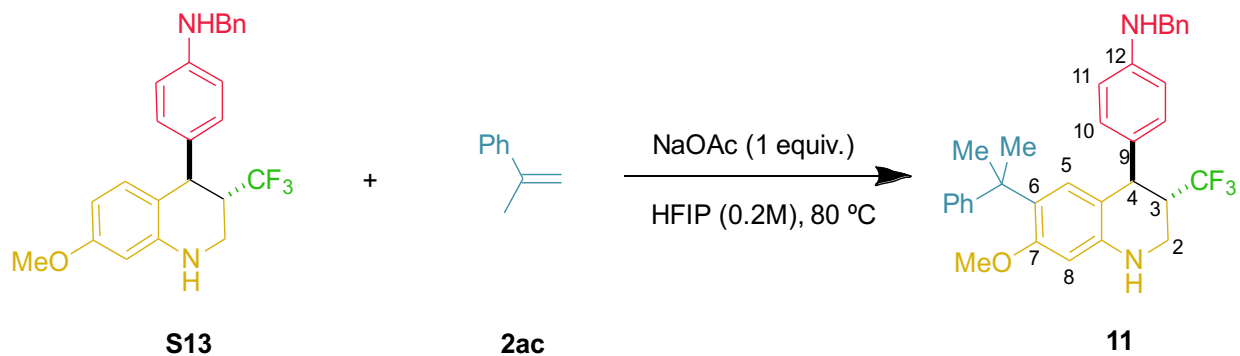

From adapted procedure,<sup>6</sup> aniline **S13** (82.5 mg, 0.20 mmol), alkene **2ac** (47.3 mg, 0.4 mmol), and sodium acetate (16.4 mg, 0.2 mmol), in 1 mL of HFIP, aniline **11** was obtained. Chromatographic purification with deactivated silica (gradient elution: 10:90  $\rightarrow$  50:50 Et<sub>2</sub>O – hexane) gave **11** (49 mg, 46%; 53% based on recovered starting material), as a white foam. Note: acid-sensitive compound.

Data for **11**:  $R_f$  0.2 (30% Et<sub>2</sub>O – hexane). <sup>1</sup>H NMR (500 MHz, DMSO-*d*<sub>6</sub>)  $\delta$  7.36 (2H d,  $J$  = 6.9 Hz, Ar Bn), 7.29 (2H t,  $J$  = 7.6 Hz, Ar Bn), 7.20 (1H t,  $J$  = 7.1 Hz, Ar Bn), 7.14 (2H t,  $J$  = 7.6 Hz, Ar Ph), 7.03 (1H, t,  $J$  = 7.3 Hz, Ar Ph), 7.01 (2H, d,  $J$  = 8.0 Hz, Ar Ph), 6.84 (2H d,  $J$  = 8.5 Hz, 10-H), 6.67 (1H, s, 5-H), 6.56 (2H, d,  $J$  = 8.5 Hz, 11-H), 6.13 (1H t,  $J$  = 5.9 Hz, NH Bn), 6.11 (1H, s, 8-

H), 5.78 (1H, t,  $J = 2.8$  Hz, NH), 4.24 (2H, d,  $J = 5.9$  Hz, CH<sub>2</sub> Bn), 4.08 (1H, d,  $J = 5.0$  Hz, 4-H), 3.24 – 3.24 (2H, m, 2-H<sub>2</sub>), 3.23 (3H, s, OMe), 2.74 (1H, m, 3-H), 1.43 (3H, s, Me), 1.37 (3H, s, Me). <sup>13</sup>C NMR (126 MHz, DMSO-d<sub>6</sub>)  $\delta$  156.5 (1C, C Ar), 151.7 (1C, C Ar), 147.2 (1C, C Ar), 144.0 (1C, C Ar), 140.3 (1C, C Ar), 132.6 (1C, C Ar), 128.8 (2C, C-10), 128.2 (2C, CH Ar), 128.0 (1C, C-5), 127.5 (1C, q,  $J = 281.1$  Hz, CF<sub>3</sub>), 127.4 (2C, CH Ar), 127.3 (2C, CH Ar), 126.6 (1C, CH Ar), 125.9 (1C, C Ar), 125.1 (2C, CH Ar), 124.5 (1C, CH Ar), 112.2 (2C, CH Ar), 112.1 (1C, C Ar), 98.6 (1C, C-8), 54.8 (1C, OMe), 46.7 (1C, CH<sub>2</sub> Bn), 43.8 (1C, q,  $J = 23.8$  Hz, C-3), 40.7 (1C, C-Me<sub>2</sub>), 40.4 (1C, C-4), 36.9 (1C, C-2), 30.2 (1C, Me), 29.5 (1C, Me). HRMS (ESI): calculated for C<sub>38</sub>H<sub>42</sub>F<sub>3</sub>N<sub>2</sub>O<sub>3</sub> [M+H]<sup>+</sup> requires  $m/z$  631.3143, found  $m/z$  631.3148.

## 8. Mechanistic studies

### 8.1. Control experiments

#### · Radical trapping

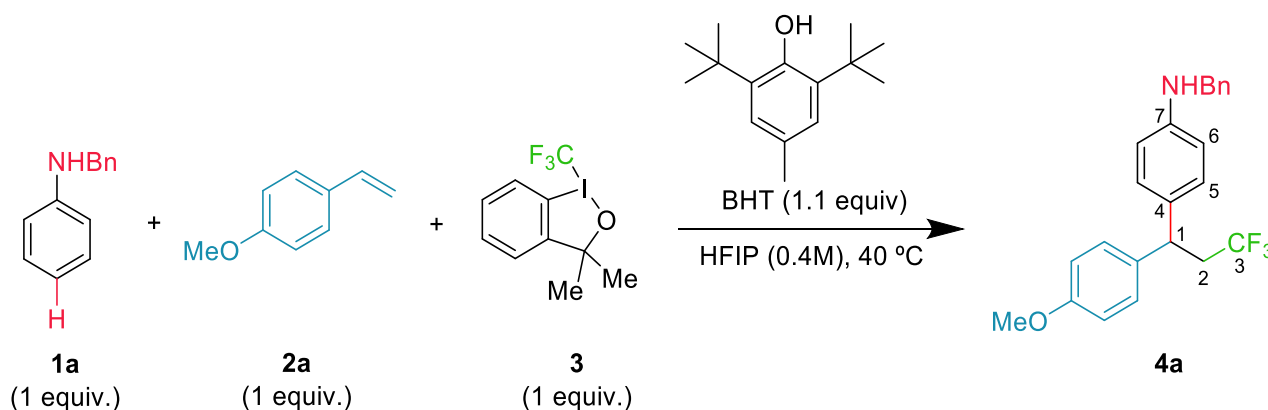

From aniline **1a** (36.7 mg, 0.2 mmol), alkene **2a** (26.8 mg, 0.2 mmol), trifluoromethyl reagent **3** (66.0 mg, 0.2 mmol) and BHT (48.5 mg, 0.22 mmol) in 0.5 mL of HFIP, following the general procedure, aniline **4a** was obtained. Chromatographic purification (gradient elution: 0:100 → 10:90 Et<sub>2</sub>O – hexane) gave **4a** (46.3 mg, 62%), as a yellow oil.

#### · Radical clock experiment

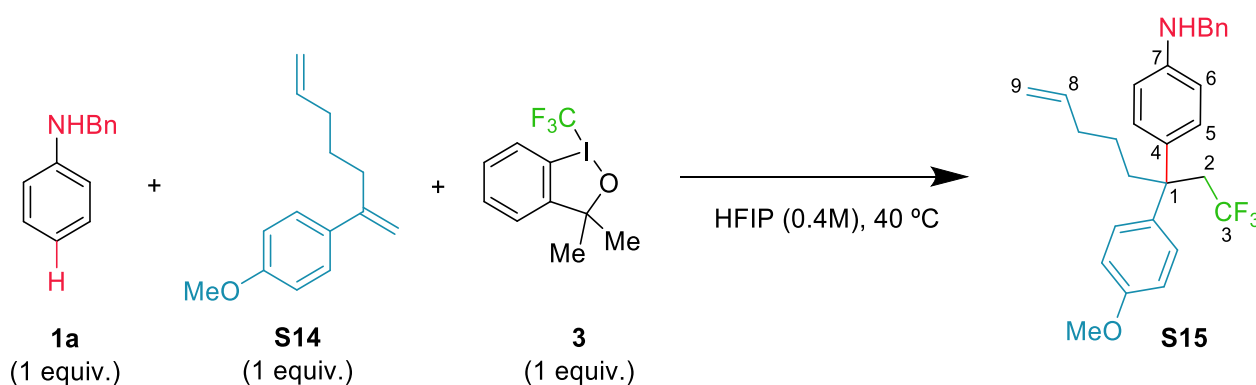

From aniline **1a** (36.7 mg, 0.2 mmol), alkene **S14** (40.5 mg, 0.2 mmol), trifluoromethyl reagent **3** (66.0 mg, 0.2 mmol), in 0.5 mL of HFIP, following the general procedure, aniline **S15** was obtained. Chromatographic purification (gradient elution: 0:100 → 12:88 Et<sub>2</sub>O – hexane) gave **S15** (21.5 mg, 24%), as a yellow oil.

Data for **S15**: *R<sub>f</sub>* 0.2 (20% Et<sub>2</sub>O – hexane). <sup>1</sup>H NMR (300 MHz, CDCl<sub>3</sub>) δ 7.51 – 7.28 (5H, m, Ar), 7.08 (2H, d, *J* = 8.9 Hz, Ar), 6.94 (2H, d, *J* = 8.7 Hz, Ar), 6.80 (2H, d, *J* = 8.9 Hz, Ar), 6.56 (2H, d, *J* = 8.7 Hz, Ar), 5.71 (1H, ddt, *J* = 16.9, 10.2 and 6.7 Hz, 8-H), 5.06 – 4.86 (2H, m, 9-H<sub>2</sub>), 4.30 (2H, s, CH<sub>2</sub>), 3.79 (3H, s, OMe), 2.93 (2H, q, *J* = 10.9 Hz, 2-H<sub>2</sub>), 2.28 – 2.17 (2H, m, CH<sub>2</sub>), 2.10 – 1.94 (4H, m, 2 x CH<sub>2</sub>). HRMS (ESI): calculated for C<sub>28</sub>H<sub>31</sub>F<sub>3</sub>NO [M+H]<sup>+</sup> requires *m/z* 454.2352, found *m/z* 454.2350.

*Note*: Compound **S15** is unstable and decomposes during column flash purification.

#### Intramolecular lactonization

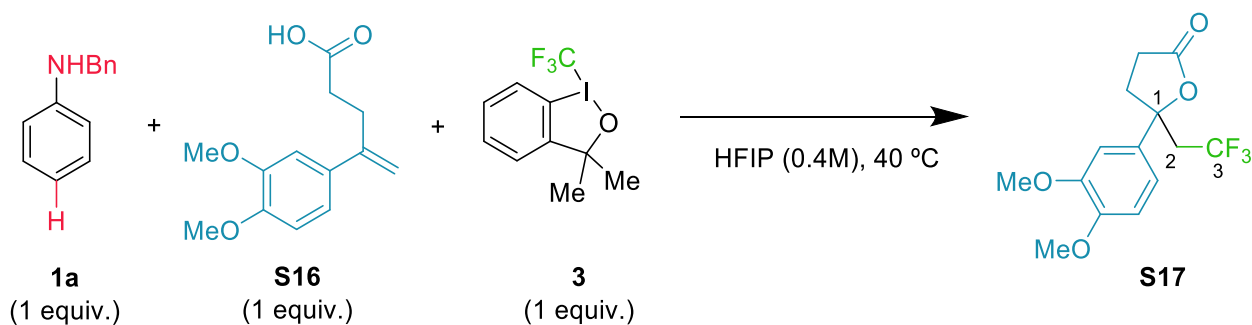

From aniline **1a** (31.9 mg, 0.175 mmol), alkene **S16** (41.1 mg, 0.175 mmol), trifluoromethyl reagent **3** (57.4 mg, 0.175 mmol), in 0.5 mL of HFIP, following the general procedure, aniline **S17** was obtained. Chromatographic purification (gradient elution: 0:100 → 40:90 Et<sub>2</sub>O – hexane) gave **S17** (52 mg, 98%), as a colourless oil.

Data for **S17**: *R<sub>f</sub>* 0.1 (40% Et<sub>2</sub>O – hexane). <sup>1</sup>H NMR (300 MHz, CDCl<sub>3</sub>) δ 7.07 – 6.76 (3H, m, Ar), 3.90 (3H, s, OMe), 3.89 (3H, s, OMe), 2.82 (2H, m, 2-H<sub>2</sub>), 2.70 – 2.56 (3H, m, CH<sub>2</sub>), 2.56 – 2.39 (1H, m, CH<sub>2</sub>).

#### Using *E* and *Z* alkene

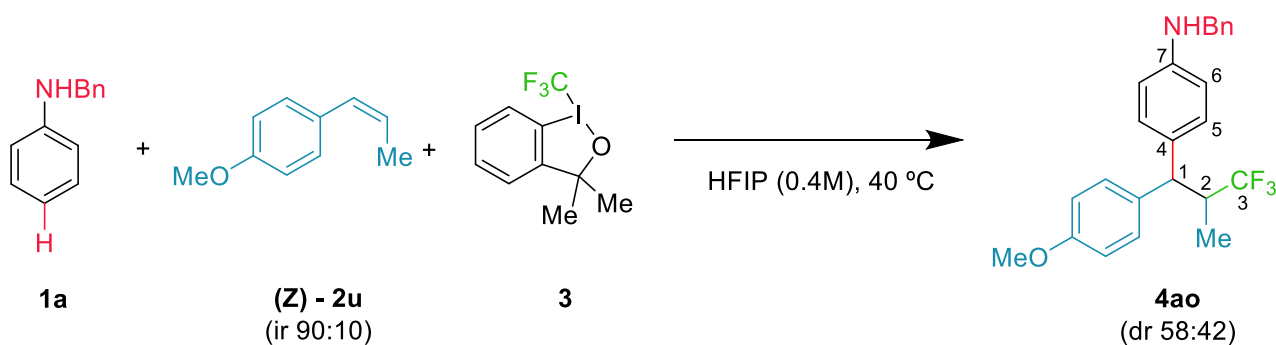

From aniline **1a** (36.7 mg, 0.2 mmol), (*Z*)-**2u**<sup>4</sup> (dr 90:10) alkene (29.6 mg, 0.2 mmol), trifluoromethyl reagent **3** (66.0 mg, 0.2 mmol) in 0.5 mL of HFIP, following the general procedure, aniline **4ao** was obtained (60%, dr 58:42).

· Michael addition to vinyl-CF<sub>3</sub>

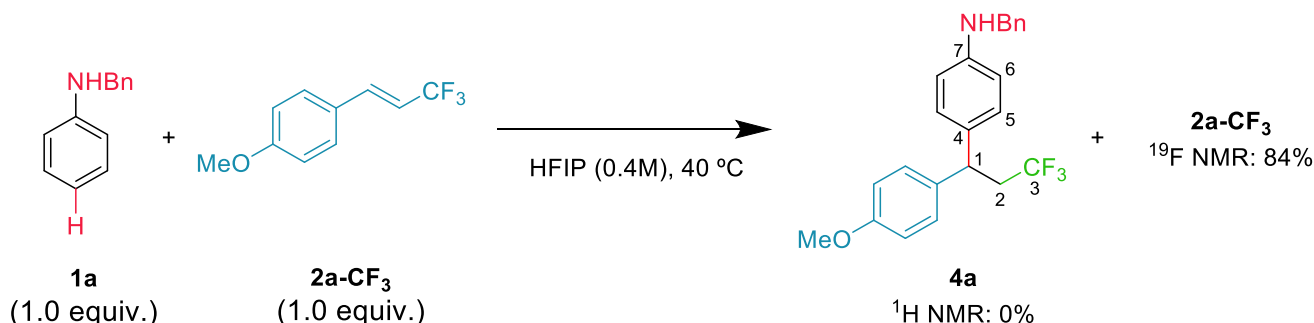

From aniline **1a** (6.3 mg, 0.04 mmol) and alkene **2a-CF<sub>3</sub>**<sup>5</sup> (6.9 mg, 0.04 mmol) in 85 μmL of HFIP, following the general procedure, starting materials were recovered, without formation of product **4a**.

· Reactivity of styrenes against **3** in HFIP

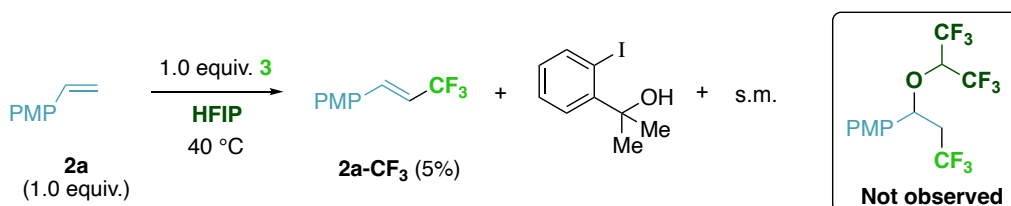

From alkene **2a** (13.4 mg, 0.1 mmol) and trifluoromethyl reagent **3** (33.0 mg, 0.1 mmol) in 0.25 mL of HFIP, following the general procedure, starting materials were recovered, with 5% of **2a-CF<sub>3</sub>** formation.

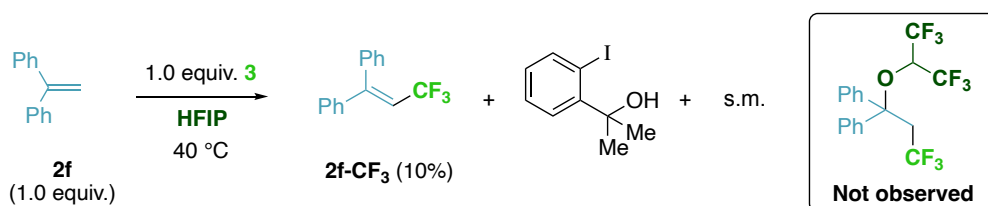

From alkene **2f** (18.0 mg, 0.1 mmol) and trifluoromethyl reagent **3** (33.0 mg, 0.1 mmol) 0.25 mL of HFIP, following the general procedure, starting materials were recovered, with 10% of **2f-CF<sub>3</sub>** formation.

## · Competition experiment

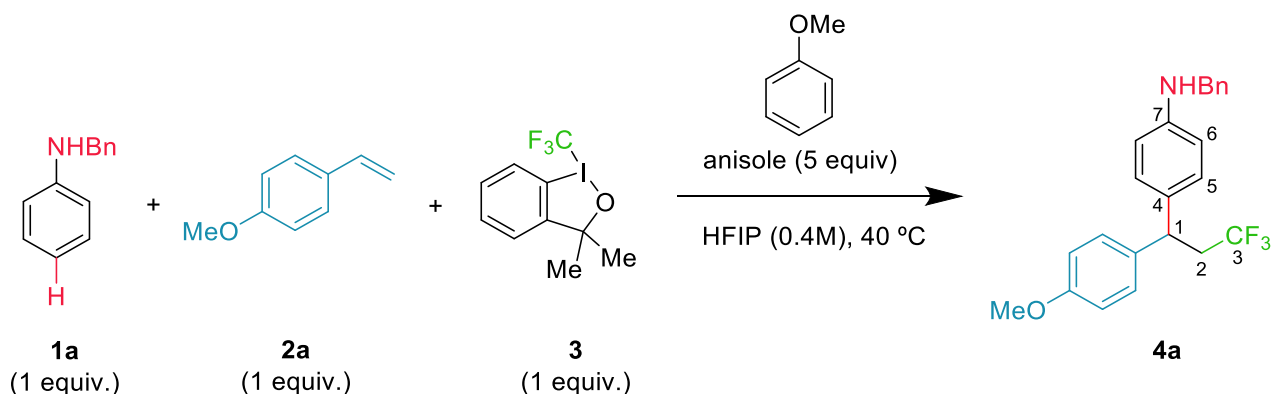

From aniline **1a** (36.7 mg, 0.2 mmol), alkene **2a** (26.8 mg, 0.2 mmol), anisole (109 mg, 1 mmol) and trifluoromethyl reagent **3** (66.0 mg, 0.2 mmol) in 0.5 mL of HFIP, following the general procedure, aniline **4a** was obtained. Chromatographic purification (gradient elution: 0:100 → 20:80 Et<sub>2</sub>O – hexane) and (isocratic elution: 4:96 AcOH – Toluene) gave **12** (54.2 mg, 70%), as a colourless oil.

## Retroarylation experiment

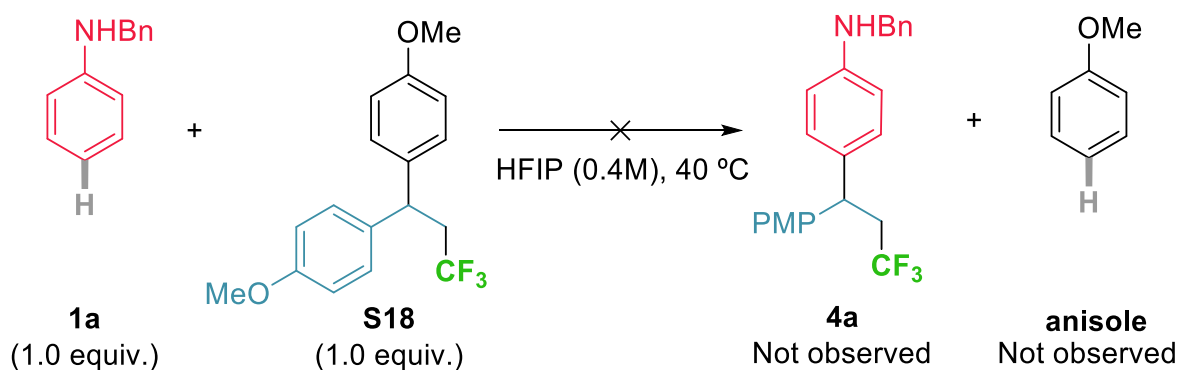

From aniline **1a** (11.6 mg, 0.064 mmol) and compound **S18**<sup>6</sup> (19.7 mg, 0.064 mmol) in 160  $\mu$ L of HFIP, following the general procedure, starting materials **1a** and **S18** were recovered, without formation of **4a** or **anisole**.

## 8.2. Cyclic Voltammetry (CV)

### General Information

Voltametric experiments were performed using an IKA Electrasyn 2.0 equipment inside a homemade Faraday's cage, recording the results at a glassy carbon macroelectrode (radius = 3.0 mm) with Bu<sub>4</sub>NPF<sub>6</sub> (0.1M) as the supporting electrolyte, using an Ag/Ag<sup>+</sup> (KCl, 3M) reference electrode and a platinum counter electrode at variable scan rates (0.1 – 0.4 V s<sup>-1</sup>).



The reductive potential of trifluoromethyl reagent **3** was investigated in ACN (Figure S1) and HFIP (Figure S2), bubbling Ar through the solution to degas it. In both cases an irreversible reductive peak is observed, the absolute maximum of which is recorded at  $-1.75$  V for ACN and  $-0.58$  V for HFIP at a scan rate of  $0.1$  V  $s^{-1}$  (Figure S3).

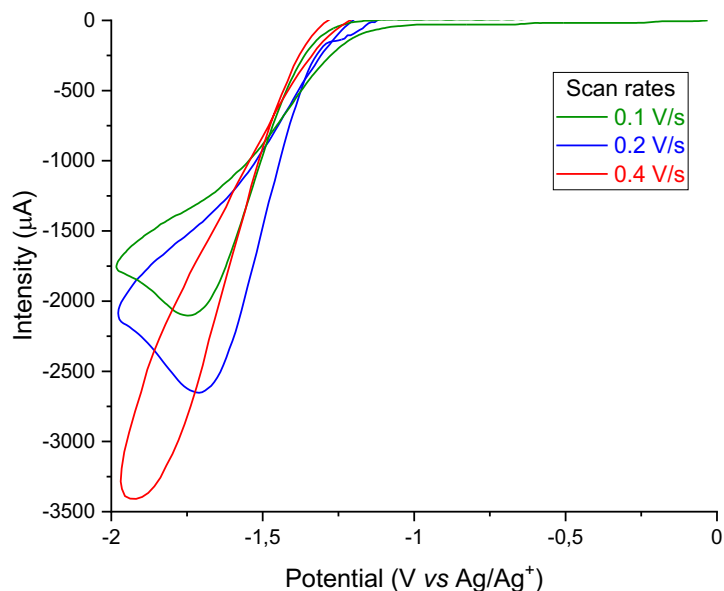

Figure S1. Reduction of trifluoromethyl reagent **3** (30 mM), 0.1 M Bu<sub>4</sub>NPF<sub>6</sub> in ACN at different scan rates (mV/s) using glassy C electrode.

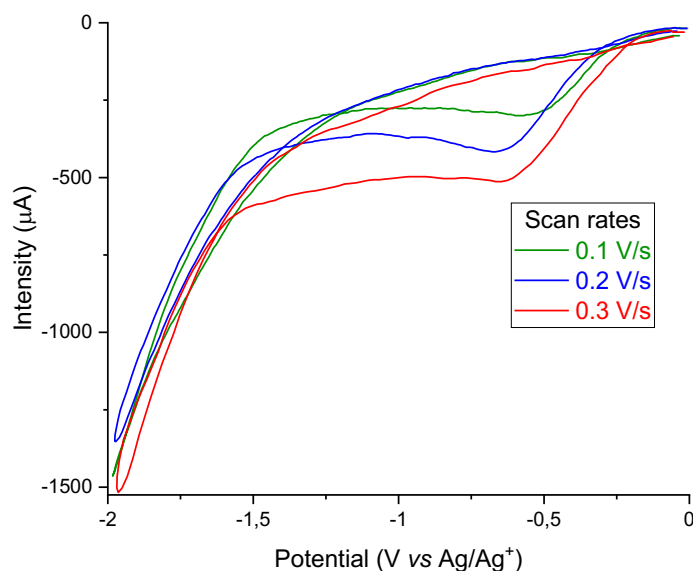

Figure S2. Reduction of trifluoromethyl reagent **3** (30 mM), 0.1 M Bu<sub>4</sub>NPF<sub>6</sub> in HFIP at different scan rates (V s<sup>-1</sup>) using glassy C electrode.

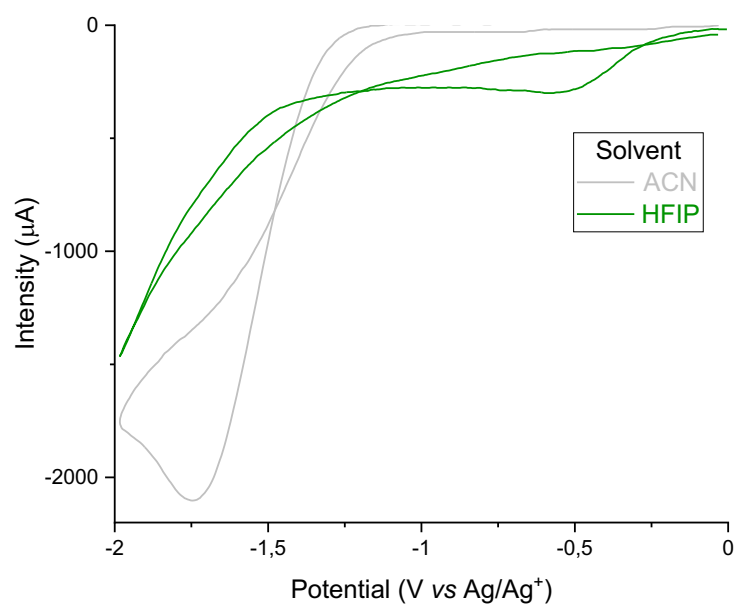

Figure S3. Reduction of **3** (30 mM), 0.1 M Bu<sub>4</sub>NPF<sub>6</sub> in HFIP (green) and ACN (grey) at a scan rate of 0.1 V s<sup>-1</sup>.

| Substrate                                                                           | HFIP (V) | Acetonitrile (V)    |
|-------------------------------------------------------------------------------------|----------|---------------------|
| 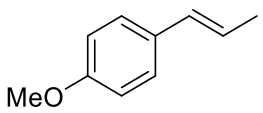  | 1.035    | 1.429; 1.874; 2.275 |
|  | 1.503    | 1.934               |
|  | 1.030    | 1.120               |
|  | 0.856    | 0.965               |
|  | 0.811    | 1.032               |

Table S6. Table of oxidation potentials for alkenes and anilines tested in the trifluoromethylarylation of alkenes using anilines in HFIP.

### 8.3. NMR experiments

#### 8.3.1. $^1\text{H}$ NMR study

$^1\text{H}$  NMR of individual species (HFIP, **1b** and **3**), two binary mixtures (HFIP : **1b** and HFIP : **3**) and one ternary mixture (HFIP : **1b** : **3**) were recorded at a 0.2 mmol scale of aniline **1b** and trifluoromethyl reagent **3**.

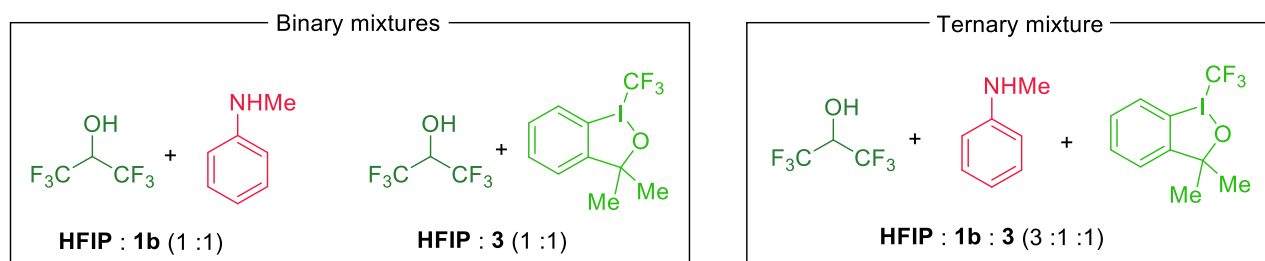

#### Analysis of the binary mixtures

The most significant changes found in  $^1\text{H}$  NMR, for the HFIP : **1b** binary mixture (Figure S4D) compared to the individual species (Figure S4A and Figure S4B) are the downfield shift (deshielded) of the OH (HFIP), from a frequency of 2.99 ppm to 5.84 ppm ( $\Delta\delta = 2.85$ ) and the downfield shift (deshielded) of the NH (**1b**), from a frequency of 3.66 ppm to 4.98 ppm ( $\Delta\delta = 1.32$ ). These data support a H-bonding between the basic amino group of the aniline and the exceptionally good hydrogen bond donor HFIP (Table S7).

The most significant changes found in  $^1\text{H}$  NMR, for the HFIP : **3** binary mixture (Figure S4E) compared to the individual species (Figure S4A and Figure S4C) is the downfield shift (deshielded) of the OH (HFIP), from a frequency of 2.99 ppm to 6.38 ppm ( $\Delta\delta = 3.39$ ), supporting a H-bonding between the ether backbone of the trifluoromethyl reagent and the exceptionally good hydrogen bond donor HFIP (Table S7).

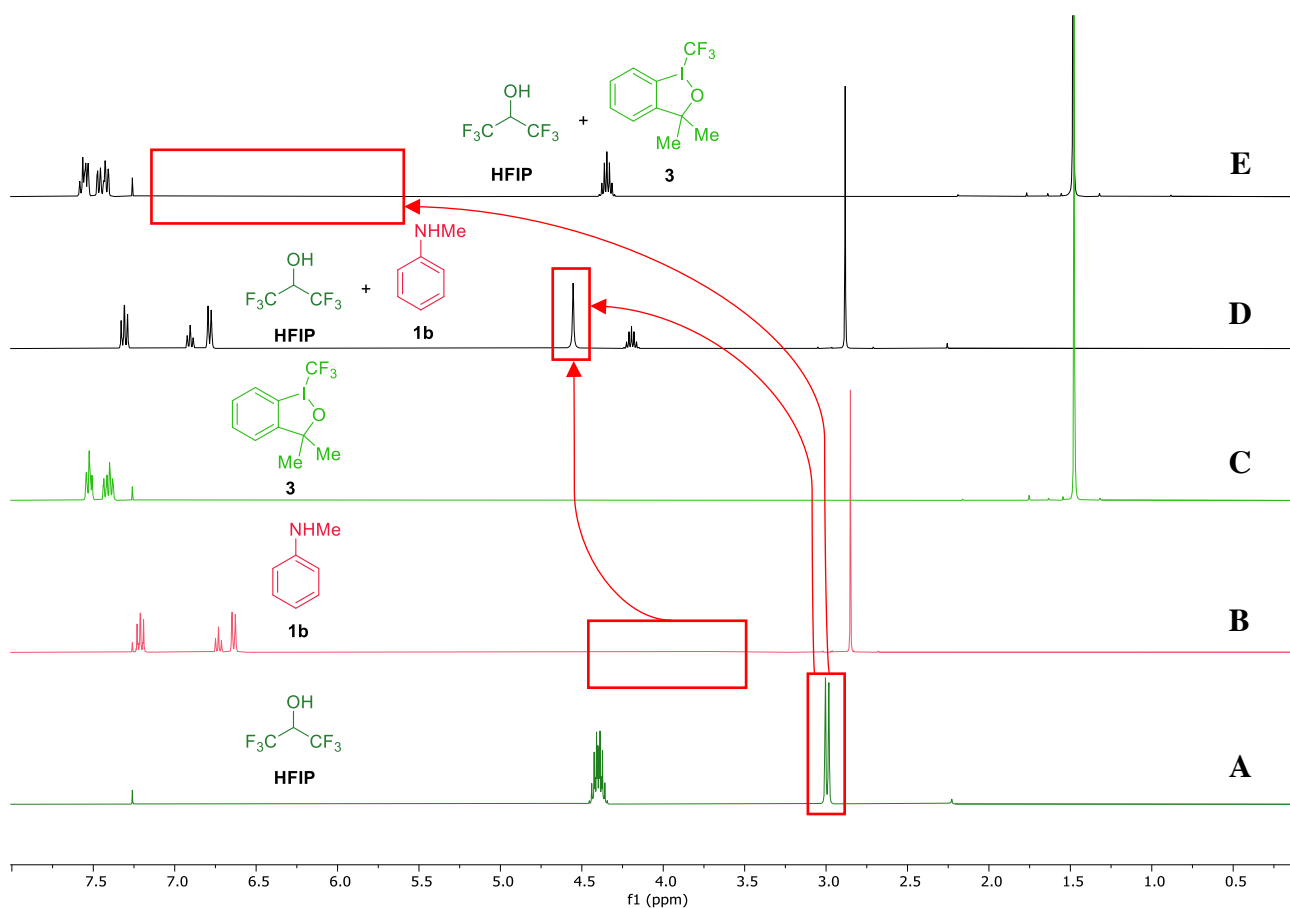

Figure S4.  $^1\text{H}$  NMR of the individual species (A-C) and the two binary mixtures (D-E).

| Signal    | Species               |            |   |                              |                             |
|-----------|-----------------------|------------|---|------------------------------|-----------------------------|
|           | HFIP                  | 1b         | 3 | Binary mixtures              |                             |
|           |                       |            |   | HFIP : 1b ( $\Delta\delta$ ) | HFIP : 3 ( $\Delta\delta$ ) |
| OH (HFIP) | 2.99, d, $J = 8.5$ Hz | -          | - | 4.55, br s (+1.56)           | 6.38, br s (+3.39)          |
| NH (1b)   | -                     | 3.66, br s | - | 4.55, s (+0.89)              | -                           |

Table S7. Significant changes for the binary mixtures with respect to individual species.

## 2) Analysis for the ternary mixture

The most significant changes found in  $^1\text{H}$  NMR, for the ternary mixture (Figure S5D) compared to the individual species (Figure S5A-C) are the downfield shift (deshielded) of the OH (HFIP), from a frequency of 2.99 ppm to 5.84 ppm ( $\Delta\delta = 2.85$ ) and the downfield shift (deshielded) of the NH (aniline), from a frequency of 3.66 ppm to 5.84 ppm ( $\Delta\delta = 2.18$ ). These data support a H-bonding between the exceptionally good hydrogen bond donor HFIP and both the basic amino group of the aniline and the ether backbone of the trifluoromethyl reagent (Table S8).

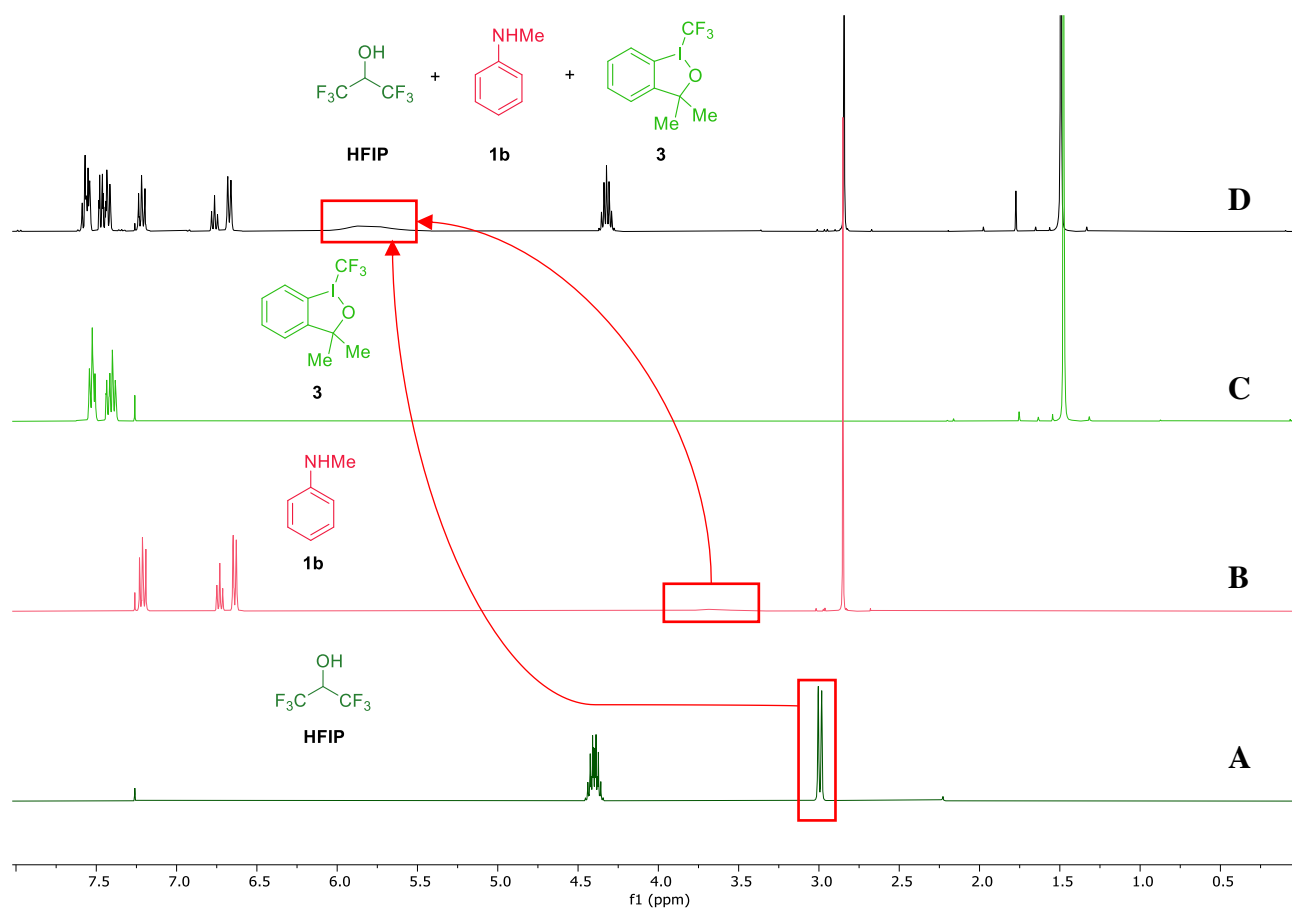

Figure S5.  $^1\text{H}$  NMR of the individual species (A-C) and the ternary mixture (D).

| Signal    | Species               |            |   |                                  |
|-----------|-----------------------|------------|---|----------------------------------|
|           | HFIP                  | 1b         | 3 | HFIP : 1b : 3 ( $\Delta\delta$ ) |
| OH (HFIP) | 2.99, d, $J = 8.5$ Hz | -          | - | 5.84, br. s. (+2.85)             |
| NH (1b)   | -                     | 3.66, br s | - | 5.84, br. s. (+2.18)             |

Table S8. Significant changes for the ternary mixture with respect to individual species.

### 8.3.2. $^{19}\text{F}$ NMR study

$^{19}\text{F}$  NMR of individual species (**3** and HFIP) and four binary mixtures of **3** : HFIP at different ratios (1:1, 1:2, 1:3 and 1:4) were recorded at a 0.2 mmol scale.

The most significant changes found in  $^{19}\text{F}$  NMR for the binary mixtures (Figure S6C-F) compared to the individual species (Figure S6A-B) are the downfield shift (deshielded) of the  $\text{CF}_3$  of **3** from a frequency of  $-40.11$  ppm up to  $-37.66$  ppm ( $\Delta\delta = 2.45$ ) and a downfield shift (deshielded) of the  $\text{CF}_3$  (HFIP) from a frequency of  $-75.79$  ppm up to  $-75.54$  ppm ( $\Delta\delta = 0.25$ ). These data support a more electrophilic  $\text{CF}_3$  group within the hypervalent iodine **3** (Table S9).

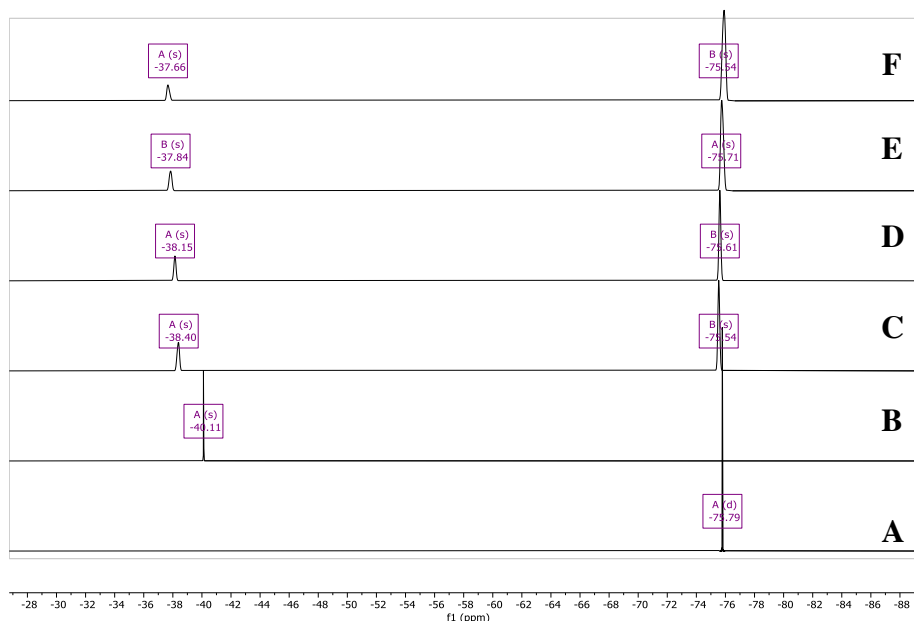

Figure S6.  $^{19}\text{F}$  NMR of HFIP, **3** and binary mixtures of **3**:HFIP.

| Signal                     | Species  |        |                                            |                                            |                                            |                                            |
|----------------------------|----------|--------|--------------------------------------------|--------------------------------------------|--------------------------------------------|--------------------------------------------|
|                            | <b>3</b> | HFIP   | <b>3</b> :HFIP (1:1)<br>( $\Delta\delta$ ) | <b>3</b> :HFIP (1:2)<br>( $\Delta\delta$ ) | <b>3</b> :HFIP (1:3)<br>( $\Delta\delta$ ) | <b>3</b> :HFIP (1:4)<br>( $\Delta\delta$ ) |
| $\text{CF}_3$ ( <b>3</b> ) | -40.11   | -      | -38.40<br>(+1.71)                          | -38.15<br>(+1.96)                          | -37.84<br>(+2.27)                          | -37.66<br>(+2.45)                          |
| $\text{CF}_3$ (HFIP)       | -        | -75.79 | -75.54<br>(+0.25)                          | -75.61<br>(+0.18)                          | -75.71<br>(+0.08)                          | -75.54<br>(+0.25)                          |

Table S9. Significant changes of **3** and HFIP for the binary mixtures with respect to individual species.

### 8.3.3. $^1\text{H}$ - $^1\text{H}$ NOESY-2D experiment

NOESY-2D spectra were collected using the standard Bruker pulse programs noesyphsw ( $90^\circ$ - $t_1$ - $90^\circ$ - $\tau_m$ - $90^\circ$ -Acq) for the ternary mixture HFIP : **1b** : **3** (3:1:1).

The most significant interaction observed in the NOESY-2D, among other, is between CH (HFIP) and Me (**3**), that is highlighted under a red box. This interaction confirms the intermolecular spatial connection between HFIP and **3**. Additionally, there is an interesting cross-peak between interchangeable OH (HFIP) and NH (aniline) signal with NMe (**1b**), highlighted under a green box, that confirms the Hydrogen-bonded ternary species.

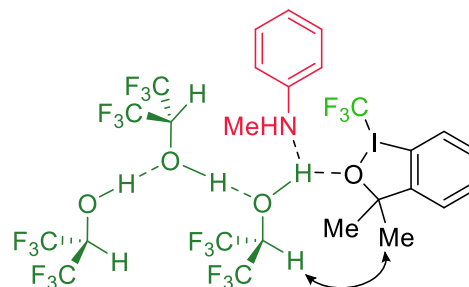

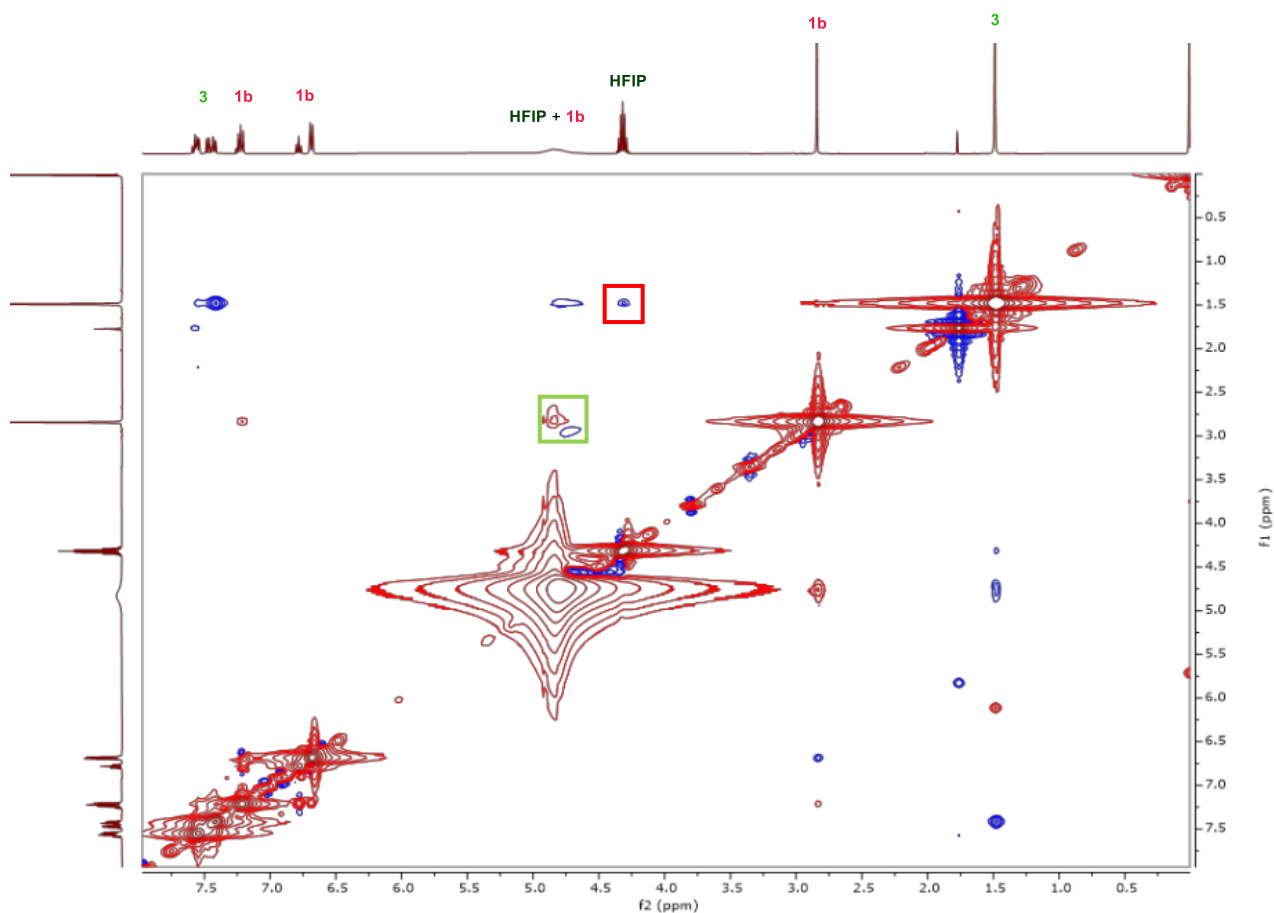

Figure S7.  $^1\text{H}$ - $^1\text{H}$  NOESY-2D (400 MHz,  $\text{CDCl}_3$ ) of the ternary mixture (HFIP : **1b** : **3**)

### 8.3.4. $^1\text{H}$ - $^{19}\text{F}$ HOESY-2D experiments

In order to confirm the proposed intermolecular interaction and taking advantage of the fluorine atoms in both components, HFIP and **3**, a series of  $^1\text{H}$ - $^{19}\text{F}$  Heteronuclear experiments were performed for both the binary (Figures S8-9) and ternary (Figure S10) mixtures.

For the HFIP : **1b** binary mixture the most significant interaction observed are between  $^{19}\text{F}$  (HFIP) and NMe and aromatic signals (**1b**), that are highlighted under red boxes (Figure S8). These interactions confirm the intermolecular spatial connection between HFIP and **1b**.

For the HFIP : **3** binary mixture the most significant interaction observed are between  $^{19}\text{F}$  (HFIP) and Me (**3**), that is highlighted under a green box (Figure S9). This interaction confirms the intermolecular spatial connection between HFIP and **3**.

For the most interesting ternary mixture the most significant interaction observed are between  $^{19}\text{F}$  (HFIP) and NMe and aromatic signals (**1b**), that are highlighted under red boxes. Additionally, there is a strong interaction between  $^{19}\text{F}$  (HFIP) and Me (**3**), that is highlighted under a green box (Figure S10). These interactions reinforce the intermolecular spatial connection between the three species within the ternary mixture.

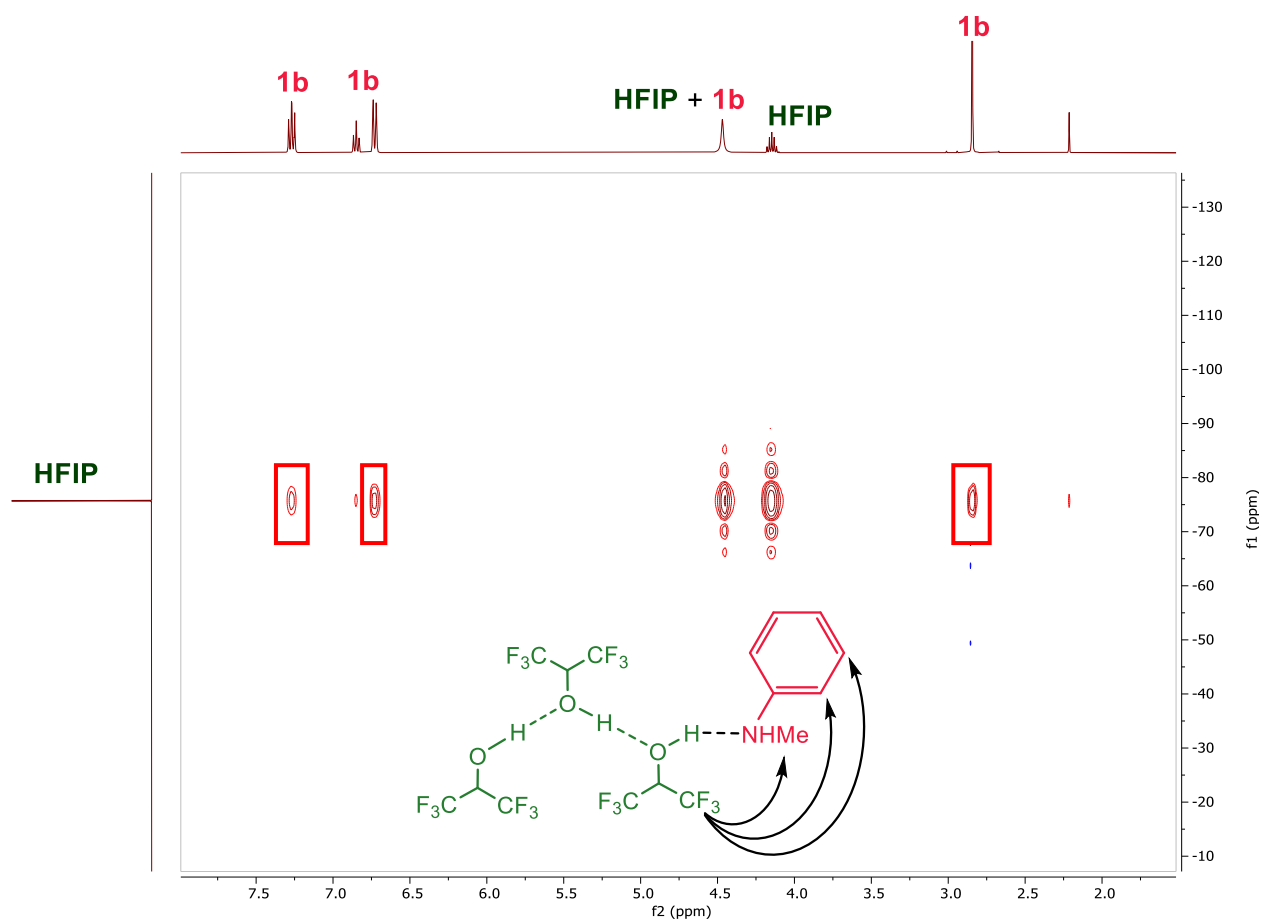

Figure S8.  $^1\text{H}$ - $^{19}\text{F}$  HOESY-2D experiment of the HFIP : **1b** binary mixture.

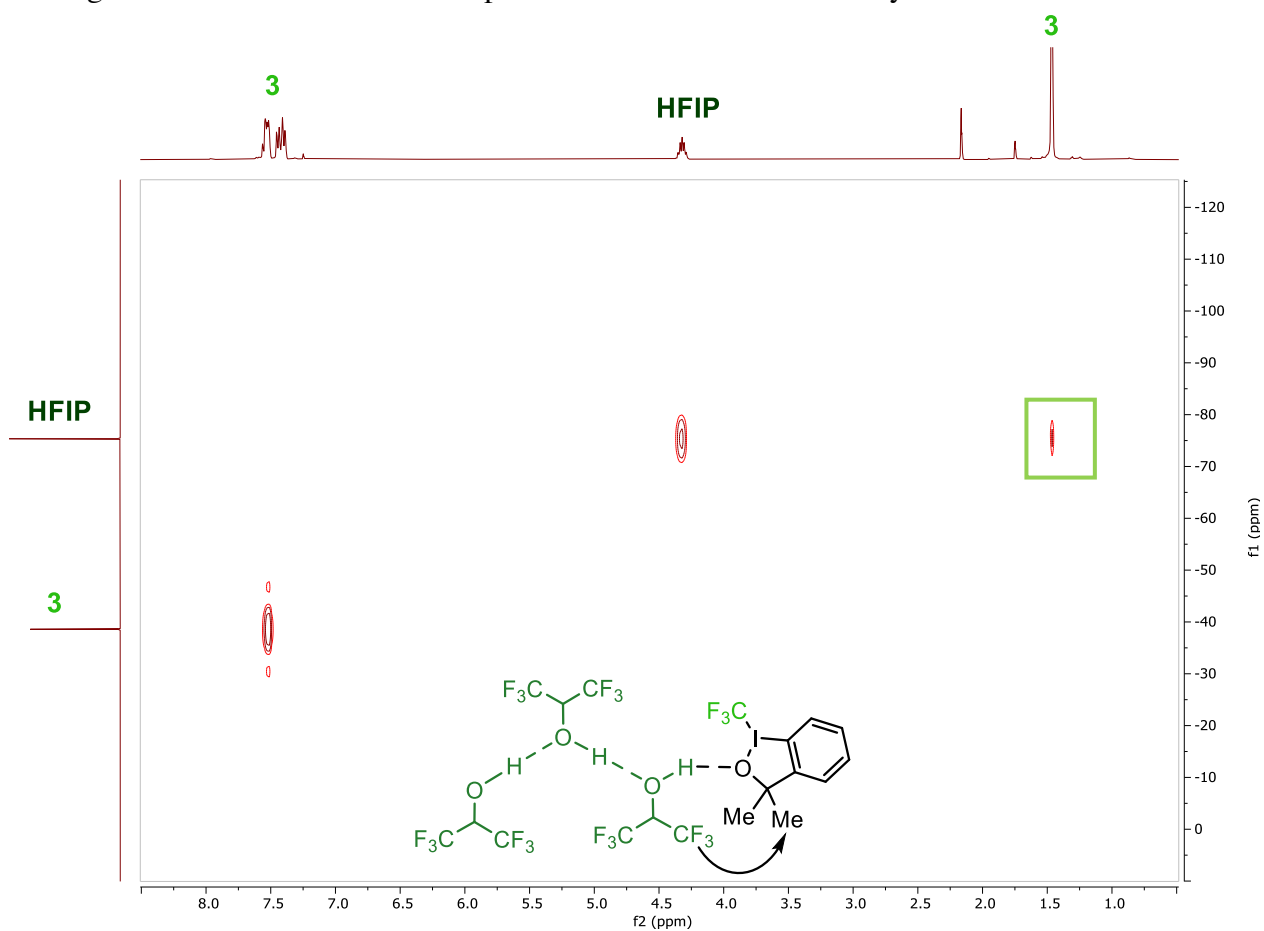

Figure S9.  $^1\text{H}$ - $^{19}\text{F}$  HOESY-2D experiment of the HFIP : **3** binary mixture.



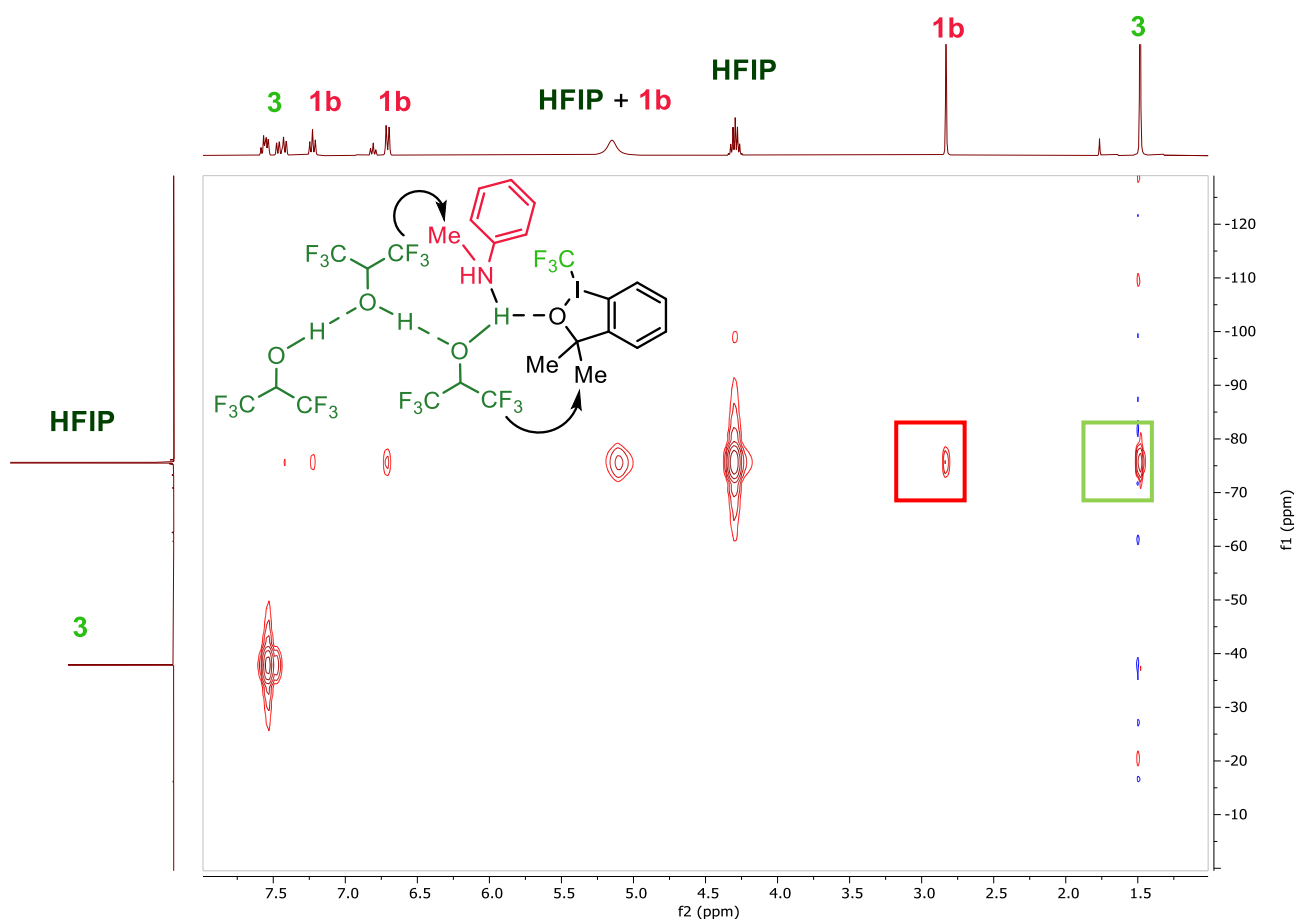

Figure S10.  $^1\text{H}$ - $^{19}\text{F}$  HOESY-2D experiment of the ternary mixture.

### 8.3.5. Diffusion ordered spectroscopy (DOSY) experiments

DOSY measurements were performed using a Bruker DPX-400 equipped with a BBFO probe head at 298 K with constant temperature control (air flow 400 l h<sup>-1</sup>) using the 2D sequence for diffusion measurement, double stimulated echo for convection compensation and longitudinal eddy current delay, using bipolar gradient pulses for diffusion and three spoil gradients (Bruker terminology: dstebpgp35) pulse sequence. Diffusion data were collected using 32K data points on well mixed homogeneous samples containing TMS as a suitable internal reference. Experiments were performed in two stages: 1) initially 1D-edited DOSY experiments were used to optimize the diffusion period  $\Delta$  for each sample ( $\Delta=100$  ms) and 2) the 2D dstebpgp35 sequence was then used, based on the optimized  $\Delta$  from the previous procedure and with  $\delta=4$  ms, with gradient amplitudes ranging from 2 to 85% using 16 increments (difflist). Diffusion constants were obtained directly employing the T1/T2 module in TOPSPIN 3.2 using the variable gradient function and plots were generated using the eddosy module.

DOSY experiments were performed as an approach to study the presence of the proposed H-bonded ternary species in solution. Individual species (HFIP, **1b** and **3**), two binary mixtures (HFIP : **1b** and HFIP : **3**) and one ternary mixture (HFIP : **1b** : **3**) were analysed to calculate their diffusion

coefficients. The diffusion coefficient for a given species is calculated as the average of the coefficients of all signals belonging to that species.

For the HFIP : **1b** binary mixture (Figure S14 and Table S10, entry 4) there is a moderate reduction in the diffusion coefficients for both HFIP ( $\Delta D/D_{TMS} = 0.2$ ) and **1b** ( $\Delta D/D_{TMS} = 0.1$ ).

For the HFIP : **3** binary mixture (Figure S15 and Table S10, entry 5) there is a strong reduction in the diffusion coefficient for HFIP ( $\Delta D/D_{TMS} = 0.52$ ), while **3** remains at the same value ( $\Delta D/D_{TMS} = 0.02$ ).

For the HFIP : **1b** : **3** ternary mixture (Figure S16 and Table S10, entry 6) there is a strong reduction in the diffusion coefficient for HFIP ( $\Delta D/D_{TMS} = 0.38$ ), a moderate reduction in the diffusion coefficient for **1b** ( $\Delta D/D_{TMS} = 0.11$ ), while **3** remains at the same value ( $\Delta D/D_{TMS} = -0.01$ ). In the ternary mixture, all species diffuse at a similar rate that is very close to the value of the heaviest component **3** ( $D/D_{TMS} = 0.54$ ), where HFIP and **1b** reduces their diffusing rate ( $D/D_{TMS} = 0.38$  and  $0.11$  respectively) to meet that of **3**, as a proof of the proposed supramolecular H-bonded species.

| Entry    | Species                                        |           | D (cm <sup>2</sup> /s) | D/D <sub>TMS</sub> | $\Delta D/D_{TMS}$ |
|----------|------------------------------------------------|-----------|------------------------|--------------------|--------------------|
| <b>1</b> | HFIP                                           |           | 2.07*10 <sup>-5</sup>  | 1.03               | -                  |
| <b>2</b> | <b>1b</b>                                      |           | 1.72*10 <sup>-5</sup>  | 0.96               | -                  |
| <b>3</b> | <b>3</b>                                       |           | 1.04*10 <sup>-5</sup>  | 0.53               | -                  |
| <b>4</b> | HFIP : <b>1b</b><br>binary mixture             | HFIP      | 1.55*10 <sup>-5</sup>  | 0.83               | <b>0.2</b>         |
|          |                                                | <b>1b</b> | 1.53*10 <sup>-5</sup>  | 0.86               | <b>0.1</b>         |
| <b>5</b> | HFIP : <b>3</b><br>binary mixture              | HFIP      | 1.11*10 <sup>-5</sup>  | 0.51               | <b>0.52</b>        |
|          |                                                | <b>3</b>  | 1.10*10 <sup>-5</sup>  | 0.51               | 0.02               |
| <b>6</b> | HFIP : <b>1b</b> : <b>3</b><br>ternary mixture | HFIP      | 1.41*10 <sup>-5</sup>  | 0.65               | <b>0.38</b>        |
|          |                                                | <b>1b</b> | 1.84*10 <sup>-5</sup>  | 0.85               | <b>0.11</b>        |
|          |                                                | <b>3</b>  | 1.18*10 <sup>-5</sup>  | 0.54               | - 0.01             |

Table S10. Diffusion coefficients: absolute values and relative to TMS.

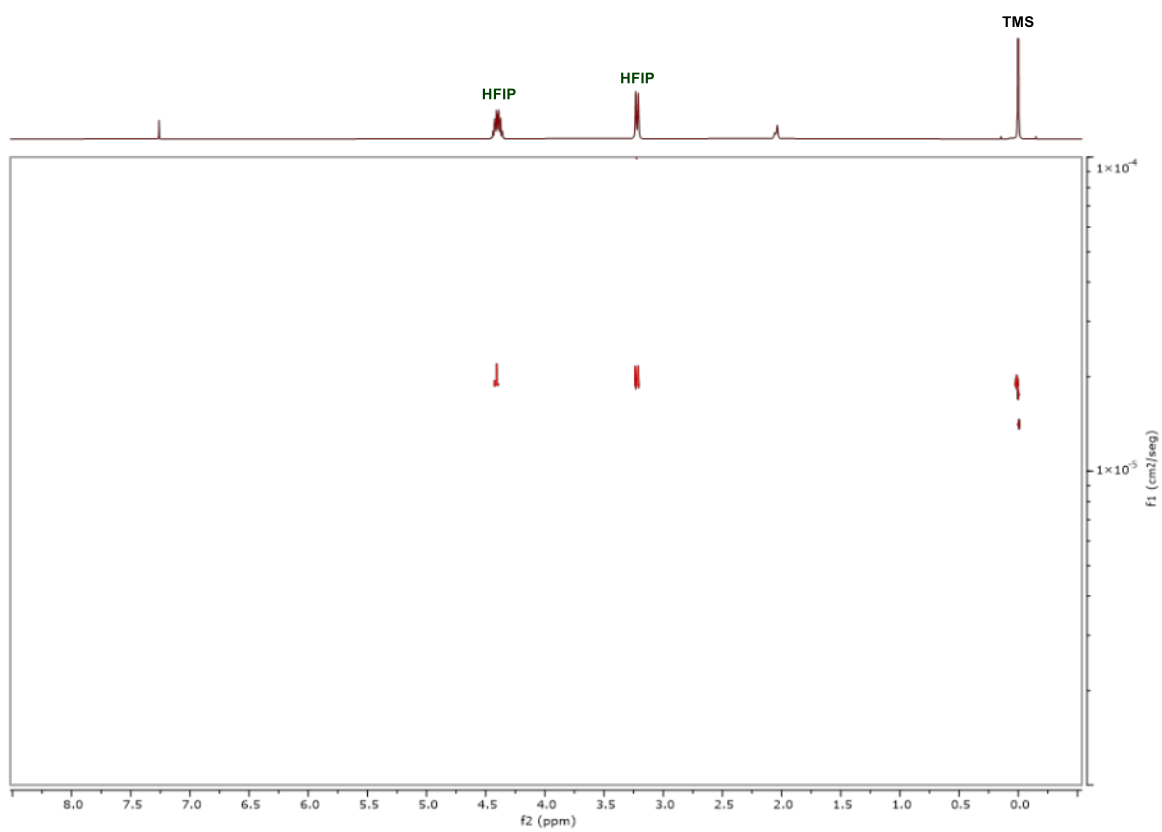

Figure S11. DOSY experiment of HFIP

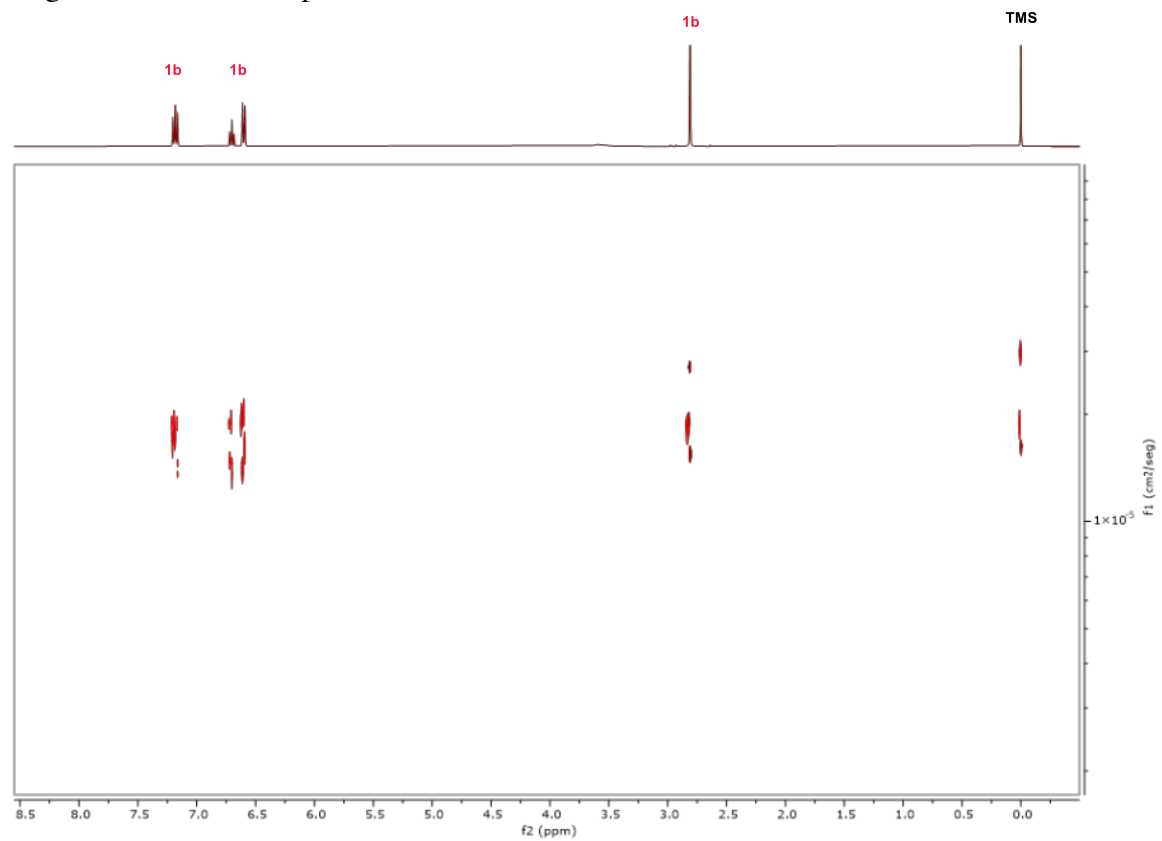

Figure S12. DOSY experiment of **1b**.

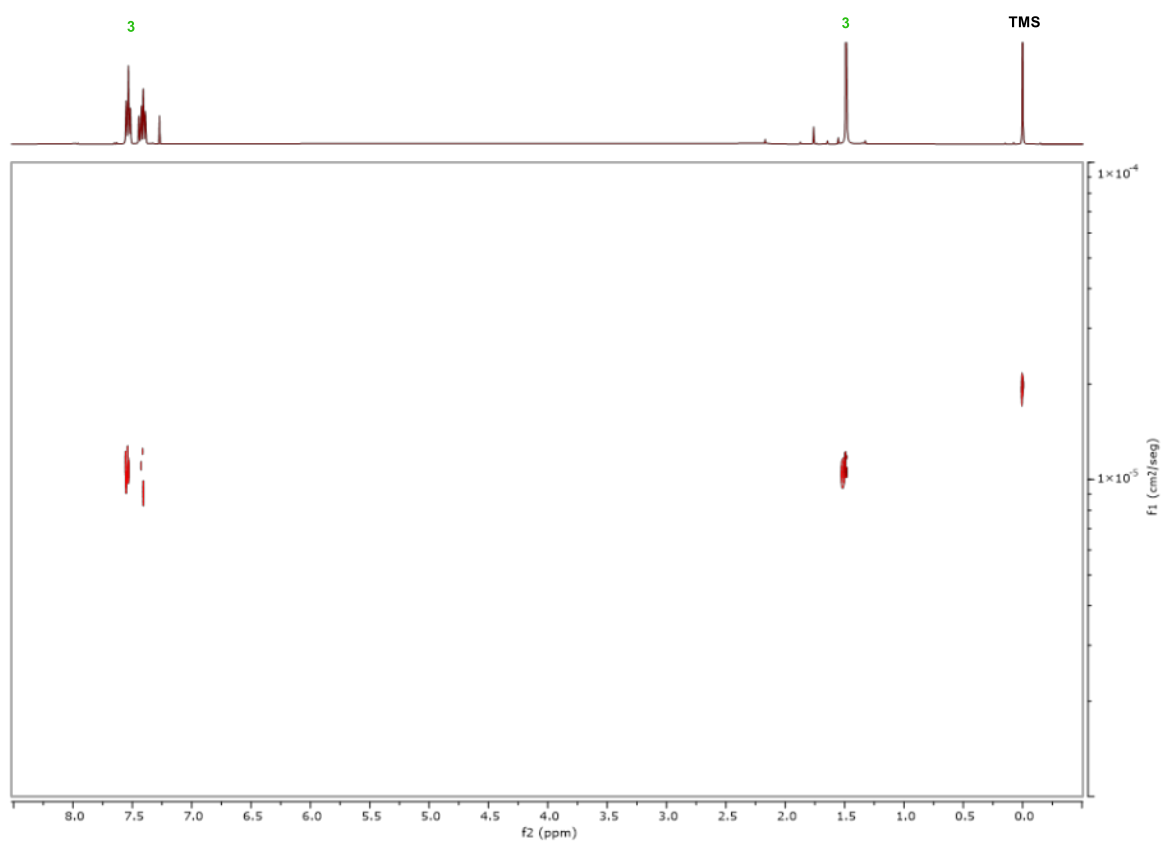

Figure S13. DOSY experiment of **3**.

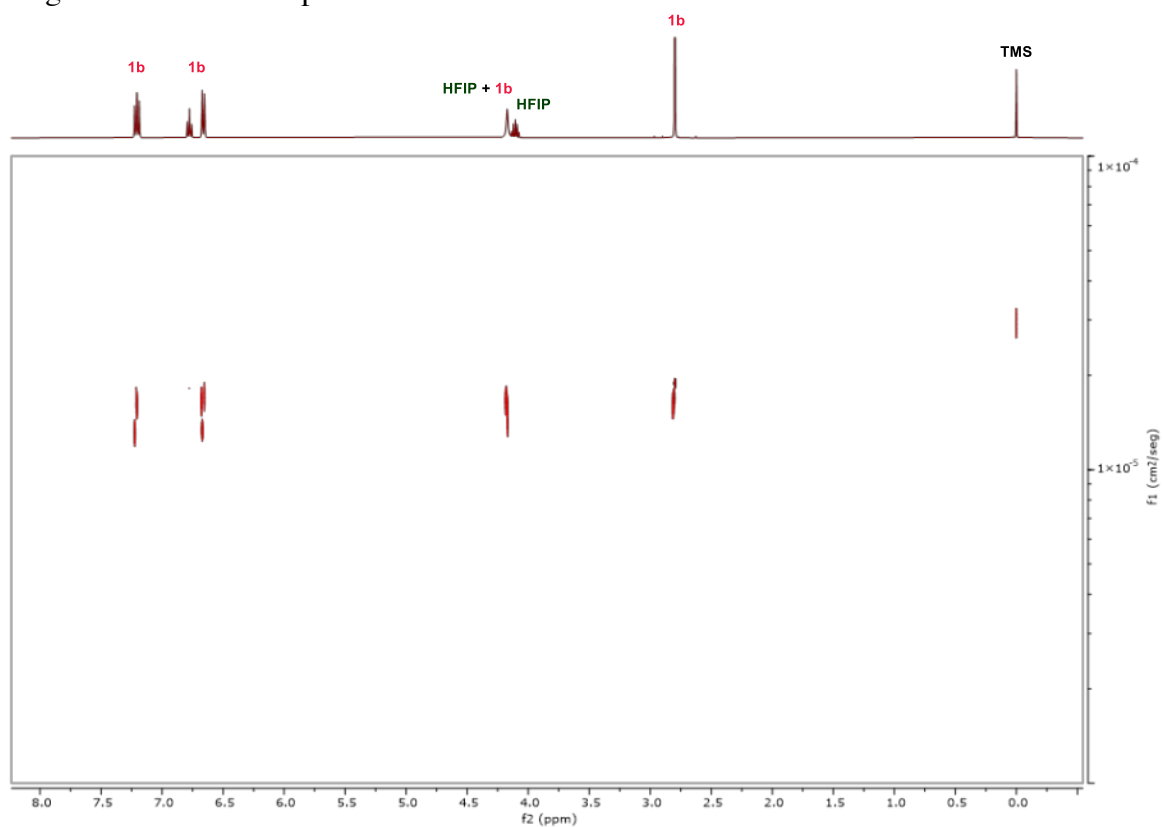

Figure S14. DOSY experiment of the **1b** : HFIP binary mixture.

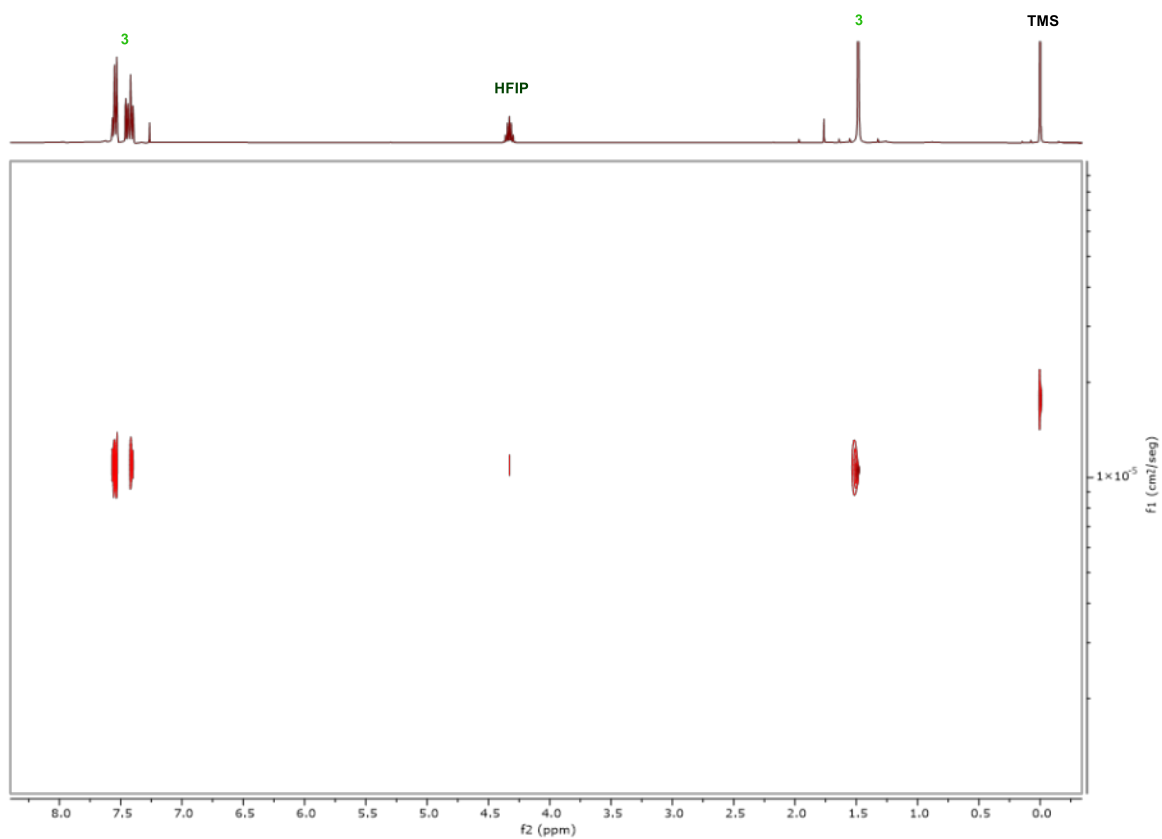

Figure S15. DOSY experiment of the **3** : HFIP binary mixture.

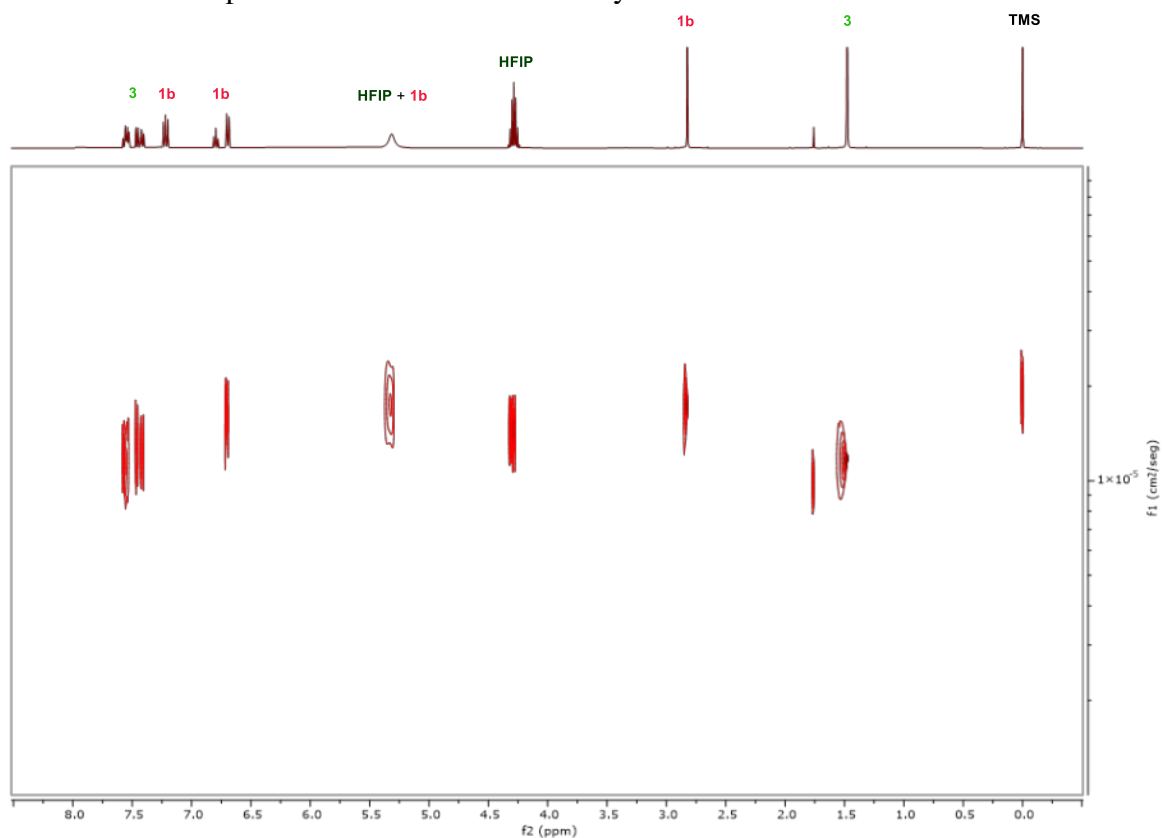

Figure S16. DOSY experiment of the **1b** : **3** : HFIP ternary mixture.

#### 8.4. Kinetic studies

Synthesis of *N*-Benzyl-*N*-[3,3,3-trifluoro-1-(4-methoxyphenyl)propyl]aniline, **12a**

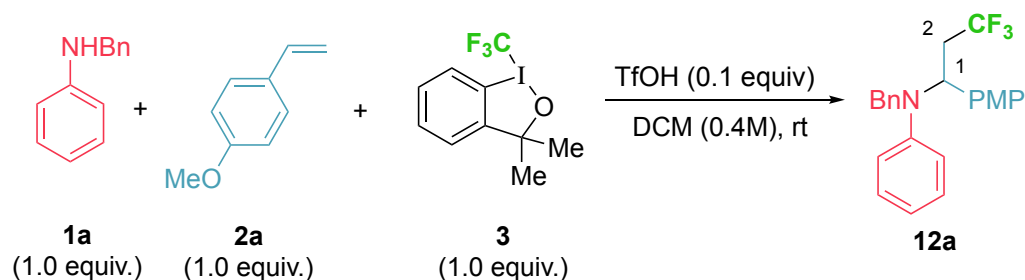

From aniline **1a** (36.7 mg, 0.2 mmol), alkene **2a** (26.8 mg, 0.2 mmol), trifluoromethyl reagent **3** (66.0 mg, 0.2 mmol) and TfOH (1.78  $\mu\text{L}$ , 0.02 mmol) in 0.5 mL of dry DCM, following the general procedure, aniline **12a** was obtained. The crude was quenched with  $\text{NaHCO}_3$ , and extracted with ethyl acetate and brine. The organic phases were dry over  $\text{Na}_2\text{SO}_4$  and chromatographic purification (gradient elution: 0:100  $\rightarrow$  20:80  $\text{Et}_2\text{O}$  – hexane) and (isocratic elution: 4:96  $\text{AcOH}$  – Toluene) gave **12a** (20.5 mg, 27%), as a colourless oil.

Data for **12a**:  $R_f$  0.45 (20%  $\text{Et}_2\text{O}$  – hexane), 0.7 (4%  $\text{AcOH}$  – toluene).  $^1\text{H NMR}$  (400 MHz,  $\text{CD}_3\text{OD}$ )  $\delta$  7.25 (2H, d,  $J = 8.7$  Hz, Ar), 7.18 – 7.03 (7H, m, Ar), 6.86 (4H, m, Ar), 6.74 (1H, t,  $J = 7.4$  and 1.0 Hz, Ar), 5.37 (1H, t,  $J = 6.8$  Hz, 1-H), 4.31 (1H, d,  $J = 16.3$  Hz,  $\text{CH}_2$  Bn), 4.15 (1H, d,  $J = 16.4$  Hz,  $\text{CH}_2$  Bn), 3.76 (3H, s, OMe), 3.05 – 2.87 (2H, m, 2- $\text{H}_2$ ).  $^{13}\text{C NMR}$  (101 MHz,  $\text{CD}_3\text{OD}$ )  $\delta$  160.7 (1C, C Ar), 149.8 (1C, C Ar), 140.4 (1C, C Ar), 131.9 (1C, C Ar), 130.1 (2C, CH Ar), 129.9 (2C, CH Ar), 129.1 (2C, CH Ar), 128.23 (1C, q,  $J = 276.5$  Hz,  $\text{CF}_3$ ), 128.18 (2C, CH Ar), 127.5 (1C, CH Ar), 120.3 (1C, CH Ar), 118.8 (2C, CH Ar), 114.7 (2C, CH Ar), 59.9 (1C, q,  $J = 2.9$  Hz, C-1), 55.7 (1C, OMe), 50.5 (1C,  $\text{CH}_2$  Bn), 36.3 (1C, q,  $J = 27.1$  Hz, C-2).  $^{19}\text{F NMR}$  (376 MHz,  $\text{MeOH-d}_4$ )  $\delta$  –64.4 (3F,  $\text{CF}_3$ ).

· Hoffman-Martius rearrangement of product **12a**

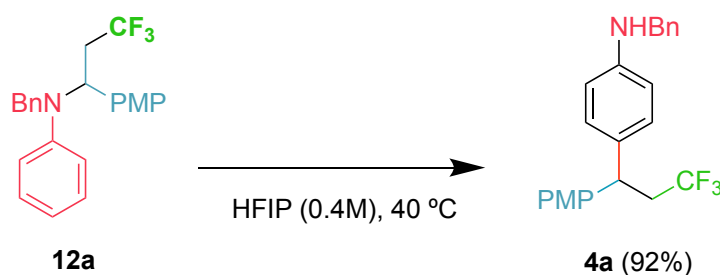

From aniline **12a** (20.5 mg, 0.053 mmol) in 133  $\mu\text{L}$  of HFIP, following the general procedure, aniline **4a** (18.8 mg, 92%) was obtained without further purification.

· Kinetic studies

Kinetic experiments were performed one round and carrying out the reaction following the general protocol. Aliquots at 5, 10, 20, 40, 60, 100, 180 and 300 minutes were taken, diluted with a solution of  $\text{CDCl}_3$  containing the internal standard and  $^1\text{H NMR}$  experiments recorded in JEOL JNM-

ECZ400R spectrometer using benzoic acid as internal standard. The integrals were measured over the most clean and isolated signal of each component of the mixture. Concentration of each aliquot was corrected to the concentration in the reaction mixture.

Different anilines were tested: *N*-Benzylaniline **1a**, Aniline **1c** and *N,N*-Dimethylaniline **1d**.

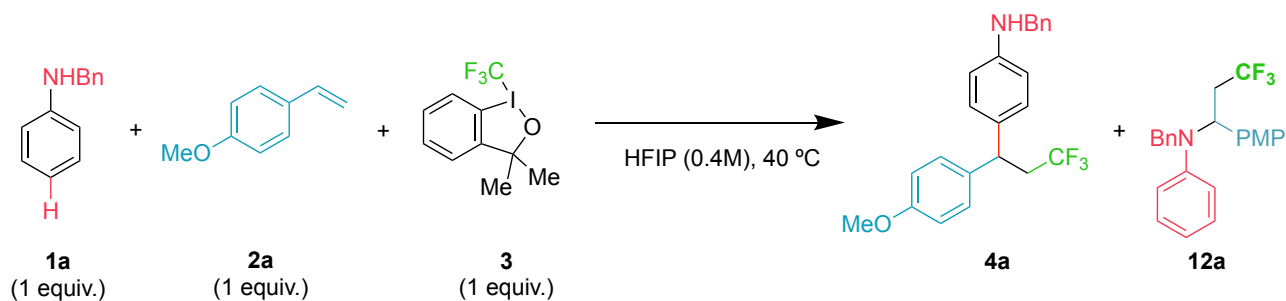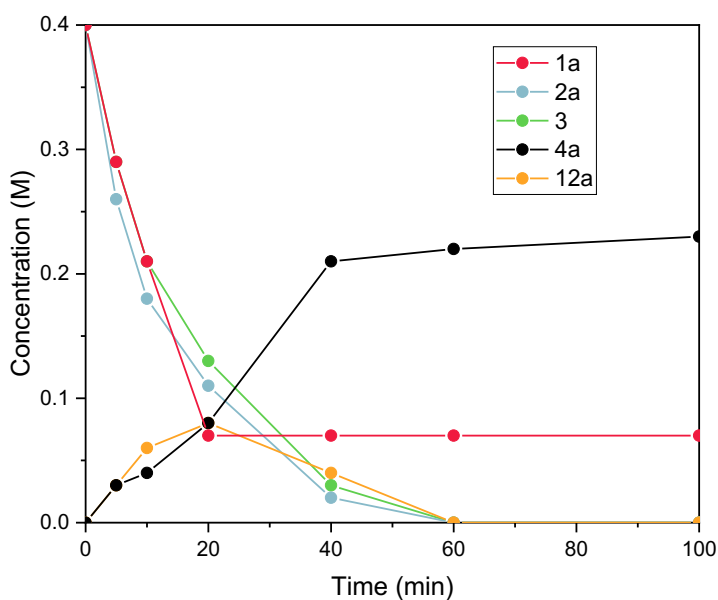

Figure S17. Kinetic experiment for the reaction mixture containing **1a**.

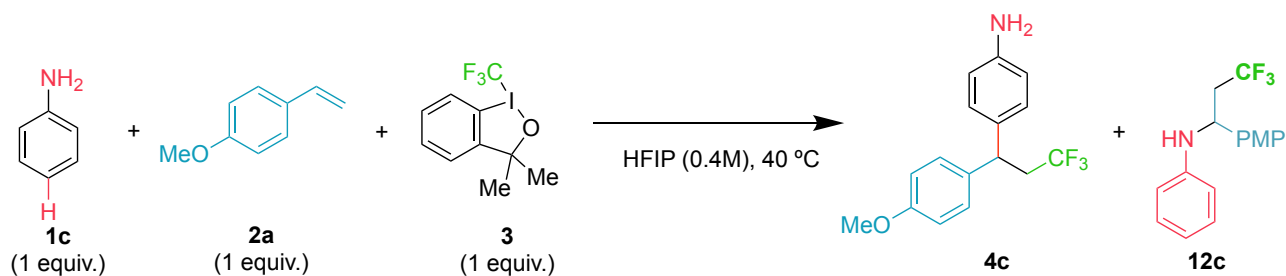

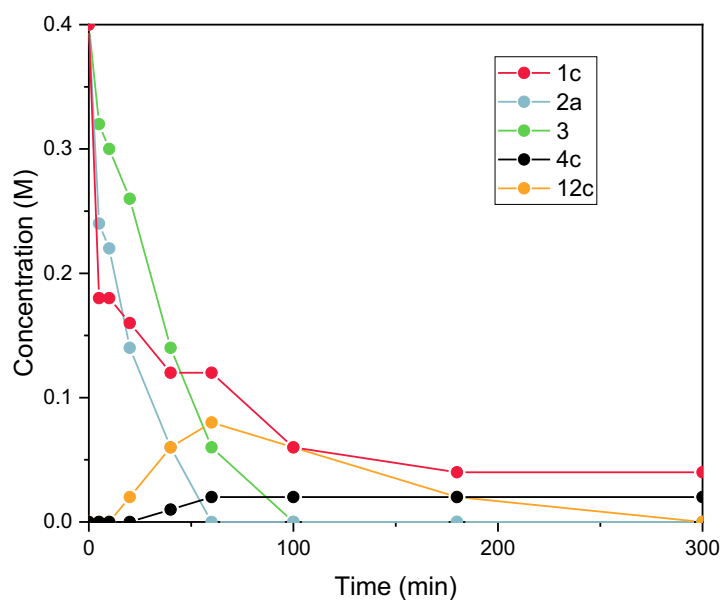

Figure S18. Kinetic experiment for the reaction mixture containing **1c**.

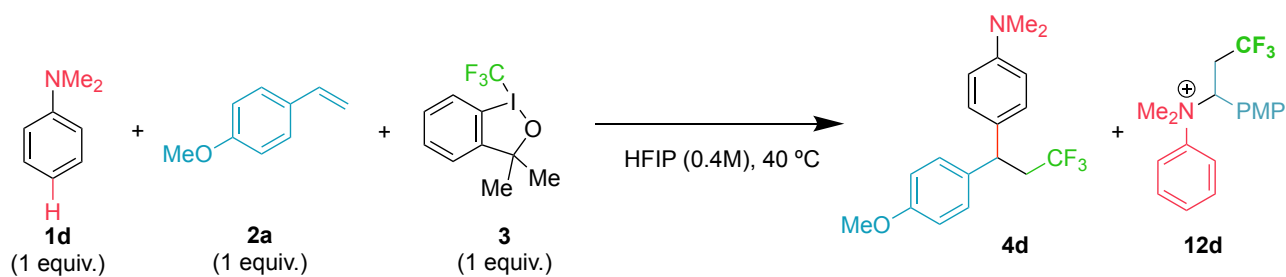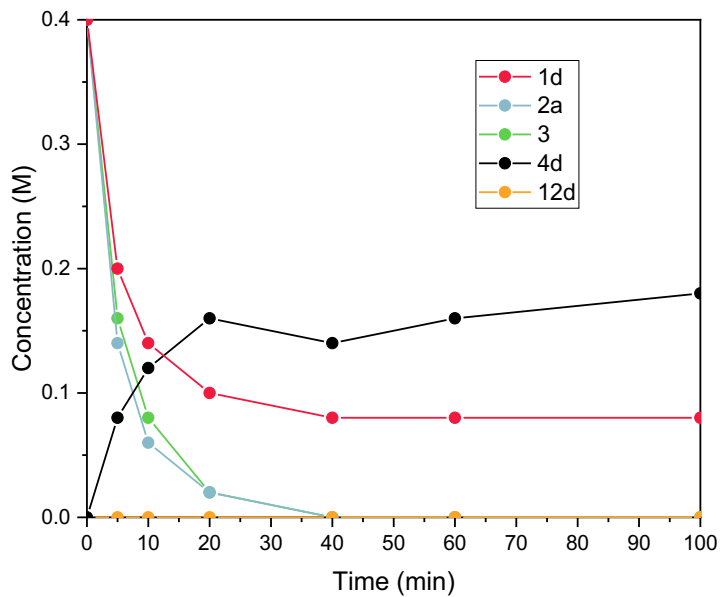

Figure S19. Kinetic experiment for the reaction mixture containing **1d**.



## 9. References

- (1) Yue, J. F., Ran, G. Y., Yang, X. X., Du, W. & Chen, Y. C. Asymmetric Diels–Alder Cycloadditions of Benzofulvene-Based 2,4-Dienals via Trienamine Activation. *Org. Chem. Front.* **5**, 2676–2679 (2018).
- (2) Zhang, X., Thimmaiah, M. & Fang, S. Simple and Efficient Synthesis of 4,7-Dimethoxy-1(H)-Indene. *Synth. Commun.* **37**, 1873-1877 (2007).
- (3) Jiao, M., Gao, J. & Fang, X. Enantioselective Synthesis of 4-Cyanotetrahydroquinolines via Ni-Catalyzed Hydrocyanation of 1,2-Dihydroquinolines. *Org. Lett.* **22**, 8566-8571 (2020).
- (4) Nakayama, K., Maeta, N., Horiguchi, G., Kamiya, H. & Okada, Y. Radical Cation Diels–Alder Reactions by TiO<sub>2</sub> Photocatalysis. *Org. Lett.* **21**, 2246–2250 (2019).
- (5) Wang, X.-P., Lin, J.-H., Zhang, C.-P., Xiao, J.-C. & Zheng, X. Copper-Catalyzed Trifluoromethylation of Alkenes with an Electrophilic Trifluoromethylating Reagent. *Beilstein J. Org. Chem.* **9**, 2635–2640 (2013).
- (6) Wang, F., Wang, D., Mu, X., Chen, P. & Liu, G. Copper-Catalyzed Intermolecular Trifluoromethylarylation of Alkenes: Mutual Activation of Arylboronic Acid and CF<sub>3</sub><sup>+</sup> Reagent. *J. Am. Chem. Soc.* **136**, 10202–10205 (2014).

## 10. X-Ray diffraction analysis

### Crystal structure report for compound **5**

Compound **5** was crystallized using a mixture of THF : Pentane (compound **5** was dissolved in THF, and exposed to pentane vapours) in order to obtain appropriate crystals for X-ray analysis.

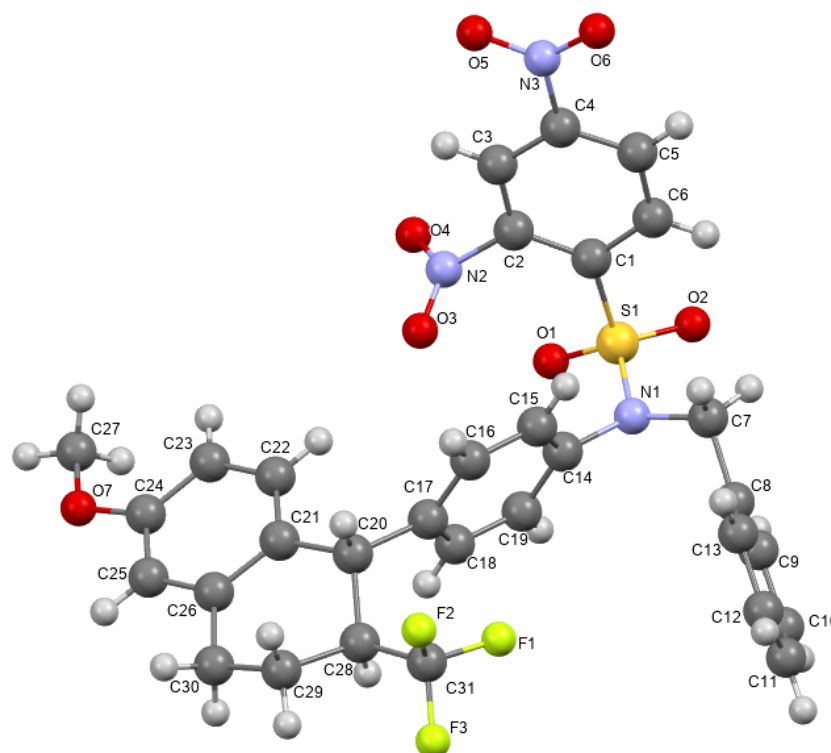

Figure S20. Ball and stick plot of compound **5** with non-hydrogen atoms labelled.

Compound **5** collection details are gathered in the following tables:

#### Table S11. Sample and crystal data for **5**.

|                               |                                                                                                                                                 |
|-------------------------------|-------------------------------------------------------------------------------------------------------------------------------------------------|
| <b>Identification code</b>    | 03673                                                                                                                                           |
| <b>Chemical formula</b>       | $C_{31}H_{26}F_3N_3O_7S \cdot C_4H_8O$                                                                                                          |
| <b>Formula weight</b>         | 713.71 g/mol                                                                                                                                    |
| <b>Temperature</b>            | 250(2) K                                                                                                                                        |
| <b>Wavelength</b>             | 0.71073 Å                                                                                                                                       |
| <b>Crystal size</b>           | 0.026 x 0.132 x 0.285 mm                                                                                                                        |
| <b>Crystal habit</b>          | clear colourless ribbon                                                                                                                         |
| <b>Crystal system</b>         | triclinic                                                                                                                                       |
| <b>Space group</b>            | P -1                                                                                                                                            |
| <b>Unit cell dimensions</b>   | $a = 5.9290(19)$ Å $\alpha = 86.336(14)^\circ$<br>$b = 13.676(4)$ Å $\beta = 88.961(14)^\circ$<br>$c = 20.842(6)$ Å $\gamma = 85.079(15)^\circ$ |
| <b>Volume</b>                 | $1680.2(9)$ Å <sup>3</sup>                                                                                                                      |
| <b>Z</b>                      | 2                                                                                                                                               |
| <b>Density (calculated)</b>   | 1.411 g/cm <sup>3</sup>                                                                                                                         |
| <b>Absorption coefficient</b> | 0.170 mm <sup>-1</sup>                                                                                                                          |
| <b>F(000)</b>                 | 744                                                                                                                                             |

**Table S12. Data collection and structure refinement for 5.**

|                                            |                                                                                                                         |              |              |
|--------------------------------------------|-------------------------------------------------------------------------------------------------------------------------|--------------|--------------|
| <b>Theta range for data collection</b>     | 1.84 to 25.35°                                                                                                          |              |              |
| <b>Index ranges</b>                        | -7<=h<=7, -16<=k<=16, -24<=l<=25                                                                                        |              |              |
| <b>Reflections collected</b>               | 50261                                                                                                                   |              |              |
| <b>Independent reflections</b>             | 6138 [R(int) = 0.0595]                                                                                                  |              |              |
| <b>Coverage of independent reflections</b> | 99.9%                                                                                                                   |              |              |
| <b>Absorption correction</b>               | Multi-Scan                                                                                                              |              |              |
| <b>Max. and min. transmission</b>          | 0.9960 and 0.9530                                                                                                       |              |              |
| <b>Structure solution technique</b>        | direct methods                                                                                                          |              |              |
| <b>Structure solution program</b>          | XT, VERSION 2018/2                                                                                                      |              |              |
| <b>Refinement method</b>                   | Full-matrix least-squares on F <sup>2</sup>                                                                             |              |              |
| <b>Refinement program</b>                  | SHELXL-2019/1 (Sheldrick, 2019)                                                                                         |              |              |
| <b>Function minimized</b>                  | $\sum w(F_o^2 - F_c^2)^2$                                                                                               |              |              |
| <b>Data / restraints / parameters</b>      | 6138 / 156 / 492                                                                                                        |              |              |
| <b>Goodness-of-fit on F<sup>2</sup></b>    | 1.049                                                                                                                   |              |              |
| <b><math>\Delta/\sigma_{\max}</math></b>   | 0.001                                                                                                                   |              |              |
| <b>Final R indices</b>                     | 4077 data; I>2 $\sigma$ (I)                                                                                             | R1 = 0.0489, | wR2 = 0.1248 |
|                                            | all data                                                                                                                | R1 = 0.0856, | wR2 = 0.1489 |
| <b>Weighting scheme</b>                    | w=1/[ $\sigma^2(F_o^2)+(0.0716P)^2+0.6321P$ ]<br>where P=(F <sub>o</sub> <sup>2</sup> +2F <sub>c</sub> <sup>2</sup> )/3 |              |              |
| <b>Largest diff. peak and hole</b>         | 0.328 and -0.376 eÅ <sup>-3</sup>                                                                                       |              |              |
| <b>R.M.S. deviation from mean</b>          | 0.053 eÅ <sup>-3</sup>                                                                                                  |              |              |

**Table S13. Atomic coordinates and equivalent isotropic atomic displacement parameters (A<sup>2</sup>) for 5**

U(eq) is defined as one third of the trace of the orthogonalized

|     | <b>x/a</b> | <b>y/b</b>  | <b>z/c</b>  | <b>U(eq)</b> |
|-----|------------|-------------|-------------|--------------|
| C1  | 0.6812(4)  | 0.69387(18) | 0.78307(12) | 0.0373(6)    |
| C2  | 0.6965(4)  | 0.70953(18) | 0.71618(12) | 0.0357(6)    |
| C3  | 0.5456(4)  | 0.77381(19) | 0.68213(13) | 0.0399(6)    |
| C4  | 0.3724(4)  | 0.82130(18) | 0.71586(13) | 0.0412(6)    |
| C5  | 0.3492(5)  | 0.8089(2)   | 0.78123(14) | 0.0468(7)    |
| C6  | 0.5069(5)  | 0.74553(19) | 0.81473(13) | 0.0446(7)    |
| C7  | 0.5627(5)  | 0.5148(2)   | 0.89714(13) | 0.0499(7)    |
| C8  | 0.5603(4)  | 0.4160(2)   | 0.93277(12) | 0.0417(6)    |
| C9  | 0.7380(5)  | 0.3784(2)   | 0.97172(13) | 0.0491(7)    |
| C10 | 0.7336(6)  | 0.2885(2)   | 0.00524(15) | 0.0603(9)    |
| C11 | 0.5535(7)  | 0.2343(3)   | 0.00043(17) | 0.0715(10)   |
| C12 | 0.3758(7)  | 0.2705(3)   | 0.96267(19) | 0.0849(12)   |
| C13 | 0.3783(6)  | 0.3611(3)   | 0.92924(16) | 0.0668(9)    |
| C14 | 0.7235(4)  | 0.44783(18) | 0.79498(11) | 0.0350(6)    |
| C15 | 0.5325(4)  | 0.45498(19) | 0.75776(12) | 0.0380(6)    |

|      | <b>x/a</b>  | <b>y/b</b>  | <b>z/c</b>  | <b>U(eq)</b> |
|------|-------------|-------------|-------------|--------------|
| C16  | 0.5183(4)   | 0.39351(19) | 0.70810(12) | 0.0395(6)    |
| C17  | 0.6925(4)   | 0.32407(18) | 0.69497(12) | 0.0370(6)    |
| C18  | 0.8835(5)   | 0.31744(19) | 0.73317(13) | 0.0439(7)    |
| C19  | 0.8995(4)   | 0.37791(19) | 0.78311(12) | 0.0411(6)    |
| C20  | 0.6765(5)   | 0.25892(19) | 0.63876(13) | 0.0425(6)    |
| C21  | 0.8654(4)   | 0.27321(18) | 0.58901(12) | 0.0377(6)    |
| C22  | 0.9637(5)   | 0.36133(19) | 0.58105(13) | 0.0431(7)    |
| C23  | 0.1347(5)   | 0.3771(2)   | 0.53627(12) | 0.0434(7)    |
| C24  | 0.2086(5)   | 0.3015(2)   | 0.49773(12) | 0.0445(7)    |
| C25  | 0.1091(5)   | 0.2139(2)   | 0.50430(13) | 0.0476(7)    |
| C26  | 0.9401(5)   | 0.19789(19) | 0.54917(12) | 0.0404(6)    |
| C27  | 0.5093(5)   | 0.3888(3)   | 0.45005(15) | 0.0604(8)    |
| C28  | 0.6720(5)   | 0.1491(2)   | 0.65904(13) | 0.0468(7)    |
| C29  | 0.6489(5)   | 0.0918(2)   | 0.59849(15) | 0.0563(8)    |
| C30  | 0.8512(6)   | 0.0978(2)   | 0.55589(14) | 0.0537(8)    |
| C31  | 0.4839(5)   | 0.1257(2)   | 0.70474(16) | 0.0542(8)    |
| F1   | 0.4773(4)   | 0.17316(14) | 0.75891(9)  | 0.0799(6)    |
| F2   | 0.2793(3)   | 0.14497(17) | 0.67987(11) | 0.0865(7)    |
| F3   | 0.5021(3)   | 0.03000(13) | 0.72425(10) | 0.0736(6)    |
| N1   | 0.7445(4)   | 0.51288(16) | 0.84685(10) | 0.0407(5)    |
| N2   | 0.8774(4)   | 0.65853(17) | 0.67759(10) | 0.0425(5)    |
| N3   | 0.2047(4)   | 0.88810(18) | 0.67887(14) | 0.0549(6)    |
| O1   | 0.0646(3)   | 0.58918(14) | 0.79204(10) | 0.0517(5)    |
| O2   | 0.8914(4)   | 0.65760(16) | 0.88970(10) | 0.0634(6)    |
| O3   | 0.8590(4)   | 0.57345(14) | 0.66738(10) | 0.0566(6)    |
| O4   | 0.0272(3)   | 0.70723(16) | 0.65659(11) | 0.0642(6)    |
| O5   | 0.2416(4)   | 0.90490(17) | 0.62182(12) | 0.0720(7)    |
| O6   | 0.0392(4)   | 0.92198(17) | 0.70802(13) | 0.0759(7)    |
| O7   | 0.3797(4)   | 0.30662(16) | 0.45293(9)  | 0.0609(6)    |
| S1   | 0.87011(12) | 0.61234(5)  | 0.83071(3)  | 0.0437(2)    |
| O8A  | 0.0962(15)  | 0.9357(6)   | 0.8965(5)   | 0.1069(18)   |
| C32A | 0.1215(19)  | 0.0388(8)   | 0.8782(8)   | 0.131(4)     |
| C33A | 0.908(2)    | 0.0860(10)  | 0.8689(10)  | 0.179(6)     |
| C34A | 0.7384(15)  | 0.0168(7)   | 0.9043(8)   | 0.148(4)     |
| C35A | 0.8692(19)  | 0.9245(8)   | 0.8997(8)   | 0.125(4)     |
| O8B  | 0.124(4)    | 0.9676(16)  | 0.8873(13)  | 0.1069(18)   |
| C32B | 0.052(4)    | 0.0604(15)  | 0.8529(12)  | 0.112(5)     |
| C33B | 0.843(4)    | 0.0909(19)  | 0.8810(16)  | 0.128(6)     |
| C34B | 0.778(4)    | 0.9904(19)  | 0.8691(13)  | 0.130(6)     |
| C35B | 0.924(4)    | 0.934(2)    | 0.9175(15)  | 0.127(7)     |

**Table S14. Bond lengths (Å) for 5.**

|           |           |           |           |
|-----------|-----------|-----------|-----------|
| C1-C6     | 1.383(4)  | C1-C2     | 1.399(4)  |
| C1-S1     | 1.780(3)  | C2-C3     | 1.373(4)  |
| C2-N2     | 1.482(3)  | C3-C4     | 1.374(4)  |
| C4-C5     | 1.368(4)  | C4-N3     | 1.483(4)  |
| C5-C6     | 1.386(4)  | C7-N1     | 1.489(3)  |
| C7-C8     | 1.500(4)  | C8-C13    | 1.372(4)  |
| C8-C9     | 1.385(4)  | C9-C10    | 1.376(4)  |
| C10-C11   | 1.360(5)  | C11-C12   | 1.366(5)  |
| C12-C13   | 1.384(5)  | C14-C15   | 1.377(4)  |
| C14-C19   | 1.383(3)  | C14-N1    | 1.457(3)  |
| C15-C16   | 1.383(4)  | C16-C17   | 1.378(3)  |
| C17-C18   | 1.389(4)  | C17-C20   | 1.526(4)  |
| C18-C19   | 1.380(4)  | C20-C21   | 1.528(4)  |
| C20-C28   | 1.537(4)  | C21-C22   | 1.382(4)  |
| C21-C26   | 1.402(3)  | C22-C23   | 1.387(4)  |
| C23-C24   | 1.386(4)  | C24-O7    | 1.370(3)  |
| C24-C25   | 1.377(4)  | C25-C26   | 1.380(4)  |
| C26-C30   | 1.505(4)  | C27-O7    | 1.413(4)  |
| C28-C31   | 1.495(4)  | C28-C29   | 1.541(4)  |
| C29-C30   | 1.484(4)  | C31-F2    | 1.327(4)  |
| C31-F1    | 1.336(4)  | C31-F3    | 1.341(3)  |
| N1-S1     | 1.620(2)  | N2-O3     | 1.211(3)  |
| N2-O4     | 1.214(3)  | N3-O5     | 1.216(3)  |
| N3-O6     | 1.217(3)  | O1-S1     | 1.420(2)  |
| O2-S1     | 1.424(2)  | O8A-C35A  | 1.368(10) |
| O8A-C32A  | 1.457(10) | C32A-C33A | 1.380(12) |
| C33A-C34A | 1.581(13) | C34A-C35A | 1.431(12) |
| O8B-C35B  | 1.427(17) | O8B-C32B  | 1.451(16) |
| C32B-C33B | 1.406(17) | C32B-C34B | 1.97(3)   |
| C33B-C34B | 1.494(19) | C34B-C35B | 1.473(19) |

**Table S15. Bond angles (°) for 5.**

|             |            |             |          |
|-------------|------------|-------------|----------|
| C6-C1-C2    | 117.8(2)   | C6-C1-S1    | 117.3(2) |
| C2-C1-S1    | 124.86(19) | C3-C2-C1    | 122.1(2) |
| C3-C2-N2    | 115.7(2)   | C1-C2-N2    | 122.2(2) |
| C2-C3-C4    | 117.6(2)   | C5-C4-C3    | 122.8(3) |
| C5-C4-N3    | 119.5(2)   | C3-C4-N3    | 117.7(3) |
| C4-C5-C6    | 118.5(2)   | C1-C6-C5    | 121.2(3) |
| N1-C7-C8    | 110.4(2)   | C13-C8-C9   | 117.7(3) |
| C13-C8-C7   | 120.9(3)   | C9-C8-C7    | 121.3(3) |
| C10-C9-C8   | 121.2(3)   | C11-C10-C9  | 120.3(3) |
| C10-C11-C12 | 119.3(3)   | C11-C12-C13 | 120.7(3) |
| C8-C13-C12  | 120.7(3)   | C15-C14-C19 | 119.7(2) |

|                |            |                |            |
|----------------|------------|----------------|------------|
| C15-C14-N1     | 121.2(2)   | C19-C14-N1     | 119.1(2)   |
| C14-C15-C16    | 120.1(2)   | C17-C16-C15    | 121.1(2)   |
| C16-C17-C18    | 118.0(2)   | C16-C17-C20    | 120.4(2)   |
| C18-C17-C20    | 121.6(2)   | C19-C18-C17    | 121.4(2)   |
| C18-C19-C14    | 119.5(2)   | C17-C20-C21    | 111.9(2)   |
| C17-C20-C28    | 113.9(2)   | C21-C20-C28    | 109.7(2)   |
| C22-C21-C26    | 118.2(2)   | C22-C21-C20    | 121.0(2)   |
| C26-C21-C20    | 120.8(2)   | C21-C22-C23    | 122.7(2)   |
| C24-C23-C22    | 118.5(2)   | O7-C24-C25     | 116.2(2)   |
| O7-C24-C23     | 124.3(3)   | C25-C24-C23    | 119.5(2)   |
| C24-C25-C26    | 122.1(2)   | C25-C26-C21    | 119.1(2)   |
| C25-C26-C30    | 118.5(2)   | C21-C26-C30    | 122.3(2)   |
| C31-C28-C20    | 114.4(2)   | C31-C28-C29    | 108.2(2)   |
| C20-C28-C29    | 108.9(2)   | C30-C29-C28    | 111.1(2)   |
| C29-C30-C26    | 114.4(2)   | F2-C31-F1      | 105.1(3)   |
| F2-C31-F3      | 106.6(3)   | F1-C31-F3      | 104.9(2)   |
| F2-C31-C28     | 113.7(3)   | F1-C31-C28     | 115.0(3)   |
| F3-C31-C28     | 110.8(2)   | C14-N1-C7      | 116.9(2)   |
| C14-N1-S1      | 117.77(16) | C7-N1-S1       | 117.99(18) |
| O3-N2-O4       | 125.5(2)   | O3-N2-C2       | 117.6(2)   |
| O4-N2-C2       | 116.8(2)   | O5-N3-O6       | 124.8(3)   |
| O5-N3-C4       | 117.9(3)   | O6-N3-C4       | 117.3(3)   |
| C24-O7-C27     | 118.9(2)   | O1-S1-O2       | 120.19(13) |
| O1-S1-N1       | 108.56(12) | O2-S1-N1       | 107.31(13) |
| O1-S1-C1       | 107.15(12) | O2-S1-C1       | 105.99(12) |
| N1-S1-C1       | 106.94(12) | C35A-O8A-C32A  | 107.2(8)   |
| C33A-C32A-O8A  | 108.1(9)   | C32A-C33A-C34A | 105.8(10)  |
| C35A-C34A-C33A | 98.9(10)   | O8A-C35A-C34A  | 111.6(9)   |
| C35B-O8B-C32B  | 105.4(17)  | C33B-C32B-O8B  | 105.1(18)  |
| C33B-C32B-C34B | 49.2(11)   | O8B-C32B-C34B  | 73.4(13)   |
| C32B-C33B-C34B | 85.4(18)   | C35B-C34B-C33B | 98.(2)     |
| C35B-C34B-C32B | 82.1(14)   | C33B-C34B-C32B | 45.4(10)   |
| O8B-C35B-C34B  | 92.0(19)   |                |            |

**Table S16. Torsion angles (°) for 5.**

|             |          |              |             |
|-------------|----------|--------------|-------------|
| C6-C1-C2-C3 | 0.1(4)   | S1-C1-C2-C3  | -179.78(19) |
| C6-C1-C2-N2 | 179.6(2) | S1-C1-C2-N2  | -0.3(4)     |
| C1-C2-C3-C4 | -1.7(4)  | N2-C2-C3-C4  | 178.8(2)    |
| C2-C3-C4-C5 | 1.8(4)   | C2-C3-C4-N3  | -177.9(2)   |
| C3-C4-C5-C6 | -0.2(4)  | N3-C4-C5-C6  | 179.5(2)    |
| C2-C1-C6-C5 | 1.5(4)   | S1-C1-C6-C5  | -178.6(2)   |
| C4-C5-C6-C1 | -1.5(4)  | N1-C7-C8-C13 | -115.1(3)   |

|                    |            |                     |             |
|--------------------|------------|---------------------|-------------|
| N1-C7-C8-C9        | 66.8(3)    | C13-C8-C9-C10       | 0.7(4)      |
| C7-C8-C9-C10       | 178.8(3)   | C8-C9-C10-C11       | 0.3(5)      |
| C9-C10-C11-C12     | -0.9(5)    | C10-C11-C12-C13     | 0.3(6)      |
| C9-C8-C13-C12      | -1.2(5)    | C7-C8-C13-C12       | -179.4(3)   |
| C11-C12-C13-C8     | 0.7(6)     | C19-C14-C15-C16     | -1.0(4)     |
| N1-C14-C15-C16     | 178.9(2)   | C14-C15-C16-C17     | 0.3(4)      |
| C15-C16-C17-C18    | 0.1(4)     | C15-C16-C17-C20     | -178.2(2)   |
| C16-C17-C18-C19    | 0.3(4)     | C20-C17-C18-C19     | 178.6(2)    |
| C17-C18-C19-C14    | -1.0(4)    | C15-C14-C19-C18     | 1.4(4)      |
| N1-C14-C19-C18     | -178.5(2)  | C16-C17-C20-C21     | 119.0(3)    |
| C18-C17-C20-C21    | -59.2(3)   | C16-C17-C20-C28     | -115.8(3)   |
| C18-C17-C20-C28    | 66.0(3)    | C17-C20-C21-C22     | -27.5(3)    |
| C28-C20-C21-C22    | -154.9(2)  | C17-C20-C21-C26     | 154.0(2)    |
| C28-C20-C21-C26    | 26.5(3)    | C26-C21-C22-C23     | -1.2(4)     |
| C20-C21-C22-C23    | -179.8(2)  | C21-C22-C23-C24     | 0.5(4)      |
| C22-C23-C24-O7     | -178.2(3)  | C22-C23-C24-C25     | 0.8(4)      |
| O7-C24-C25-C26     | 177.8(3)   | C23-C24-C25-C26     | -1.3(4)     |
| C24-C25-C26-C21    | 0.6(4)     | C24-C25-C26-C30     | -176.2(3)   |
| C22-C21-C26-C25    | 0.6(4)     | C20-C21-C26-C25     | 179.2(2)    |
| C22-C21-C26-C30    | 177.3(3)   | C20-C21-C26-C30     | -4.1(4)     |
| C17-C20-C28-C31    | 57.3(3)    | C21-C20-C28-C31     | -176.4(2)   |
| C17-C20-C28-C29    | 178.4(2)   | C21-C20-C28-C29     | -55.3(3)    |
| C31-C28-C29-C30    | -170.3(3)  | C20-C28-C29-C30     | 64.9(3)     |
| C28-C29-C30-C26    | -41.4(4)   | C25-C26-C30-C29     | -171.8(3)   |
| C21-C26-C30-C29    | 11.5(4)    | C20-C28-C31-F2      | 65.0(3)     |
| C29-C28-C31-F2     | -56.5(3)   | C20-C28-C31-F1      | -56.2(4)    |
| C29-C28-C31-F1     | -177.7(3)  | C20-C28-C31-F3      | -174.9(2)   |
| C29-C28-C31-F3     | 63.6(3)    | C15-C14-N1-C7       | 55.8(3)     |
| C19-C14-N1-C7      | -124.3(3)  | C15-C14-N1-S1       | -93.7(3)    |
| C19-C14-N1-S1      | 86.1(3)    | C8-C7-N1-C14        | 63.6(3)     |
| C8-C7-N1-S1        | -146.9(2)  | C3-C2-N2-O3         | -103.6(3)   |
| C1-C2-N2-O3        | 76.8(3)    | C3-C2-N2-O4         | 73.3(3)     |
| C1-C2-N2-O4        | -106.2(3)  | C5-C4-N3-O5         | 173.1(3)    |
| C3-C4-N3-O5        | -7.2(4)    | C5-C4-N3-O6         | -7.1(4)     |
| C3-C4-N3-O6        | 172.6(3)   | C25-C24-O7-C27      | -171.3(3)   |
| C23-C24-O7-C27     | 7.8(4)     | C14-N1-S1-O1        | -42.5(2)    |
| C7-N1-S1-O1        | 168.20(19) | C14-N1-S1-O2        | -173.86(18) |
| C7-N1-S1-O2        | 36.9(2)    | C14-N1-S1-C1        | 72.8(2)     |
| C7-N1-S1-C1        | -76.5(2)   | C6-C1-S1-O1         | -164.3(2)   |
| C2-C1-S1-O1        | 15.6(3)    | C6-C1-S1-O2         | -34.8(3)    |
| C2-C1-S1-O2        | 145.1(2)   | C6-C1-S1-N1         | 79.5(2)     |
| C2-C1-S1-N1        | -100.7(2)  | C35A-O8A-C32A-C33A  | -2.0(17)    |
| O8A-C32A-C33A-C34A | 19.(2)     | C32A-C33A-C34A-C35A | -27.(2)     |

|                    |           |                     |         |
|--------------------|-----------|---------------------|---------|
| C32A-O8A-C35A-C34A | -18.0(18) | C33A-C34A-C35A-O8A  | 27.(2)  |
| C35B-O8B-C32B-C33B | 19.(3)    | C35B-O8B-C32B-C34B  | -20.(2) |
| O8B-C32B-C33B-C34B | -51.(3)   | C32B-C33B-C34B-C35B | 70.(3)  |
| C32B-O8B-C35B-C34B | 25.(3)    | C33B-C34B-C35B-O8B  | -61.(3) |
| C32B-C34B-C35B-O8B | -18.(2)   |                     |         |

**Table S17. Anisotropic atomic displacement parameters (Å<sup>2</sup>) for 5.**

The anisotropic atomic displacement factor exponent takes the form:  $-2\pi^2[ h^2 a^{*2} U_{11} + \dots + 2 h k a^* b^* U_{12} ]$

|     | U <sub>11</sub> | U <sub>22</sub> | U <sub>33</sub> | U <sub>23</sub> | U <sub>13</sub> | U <sub>12</sub> |
|-----|-----------------|-----------------|-----------------|-----------------|-----------------|-----------------|
| C1  | 0.0386(15)      | 0.0345(14)      | 0.0395(15)      | -0.0105(11)     | -0.0002(11)     | -0.0008(11)     |
| C2  | 0.0320(14)      | 0.0331(13)      | 0.0430(15)      | -0.0119(11)     | 0.0050(11)      | -0.0037(11)     |
| C3  | 0.0439(16)      | 0.0352(14)      | 0.0411(15)      | -0.0053(11)     | 0.0021(12)      | -0.0053(12)     |
| C4  | 0.0390(15)      | 0.0310(14)      | 0.0531(17)      | -0.0045(12)     | -0.0011(12)     | 0.0008(11)      |
| C5  | 0.0427(16)      | 0.0398(15)      | 0.0565(18)      | -0.0100(13)     | 0.0096(13)      | 0.0069(12)      |
| C6  | 0.0520(17)      | 0.0404(15)      | 0.0404(15)      | -0.0089(12)     | 0.0079(13)      | 0.0056(13)      |
| C7  | 0.0508(17)      | 0.0596(19)      | 0.0361(15)      | -0.0093(13)     | 0.0068(13)      | 0.0162(14)      |
| C8  | 0.0398(15)      | 0.0557(17)      | 0.0294(13)      | -0.0119(12)     | 0.0028(11)      | 0.0031(13)      |
| C9  | 0.0427(16)      | 0.0581(19)      | 0.0468(16)      | -0.0099(14)     | -0.0054(13)     | 0.0005(14)      |
| C10 | 0.064(2)        | 0.064(2)        | 0.0495(18)      | -0.0021(16)     | -0.0065(15)     | 0.0111(17)      |
| C11 | 0.096(3)        | 0.061(2)        | 0.058(2)        | -0.0044(17)     | 0.015(2)        | -0.013(2)       |
| C12 | 0.082(3)        | 0.103(3)        | 0.078(3)        | -0.015(2)       | 0.008(2)        | -0.046(3)       |
| C13 | 0.052(2)        | 0.099(3)        | 0.0515(19)      | -0.0074(19)     | -0.0087(15)     | -0.0148(19)     |
| C14 | 0.0376(14)      | 0.0347(14)      | 0.0316(13)      | -0.0048(11)     | 0.0036(11)      | 0.0038(11)      |
| C15 | 0.0322(14)      | 0.0380(14)      | 0.0427(15)      | -0.0063(12)     | 0.0077(11)      | 0.0055(11)      |
| C16 | 0.0315(14)      | 0.0434(15)      | 0.0433(15)      | -0.0049(12)     | 0.0008(11)      | -0.0006(11)     |
| C17 | 0.0373(14)      | 0.0355(14)      | 0.0385(14)      | -0.0055(11)     | 0.0062(11)      | -0.0036(11)     |
| C18 | 0.0401(15)      | 0.0394(15)      | 0.0508(16)      | -0.0135(13)     | 0.0044(13)      | 0.0118(12)      |
| C19 | 0.0360(15)      | 0.0434(15)      | 0.0428(15)      | -0.0077(12)     | -0.0040(12)     | 0.0079(12)      |
| C20 | 0.0432(16)      | 0.0393(15)      | 0.0452(16)      | -0.0103(12)     | 0.0004(12)      | -0.0001(12)     |
| C21 | 0.0414(15)      | 0.0342(14)      | 0.0369(14)      | -0.0044(11)     | -0.0005(11)     | 0.0012(11)      |
| C22 | 0.0483(16)      | 0.0374(15)      | 0.0441(15)      | -0.0114(12)     | 0.0058(13)      | -0.0020(12)     |
| C23 | 0.0526(17)      | 0.0388(15)      | 0.0400(15)      | -0.0054(12)     | -0.0004(13)     | -0.0074(13)     |
| C24 | 0.0500(17)      | 0.0514(17)      | 0.0318(14)      | -0.0052(12)     | 0.0045(12)      | -0.0018(13)     |
| C25 | 0.0635(19)      | 0.0415(16)      | 0.0381(15)      | -0.0118(12)     | 0.0074(14)      | -0.0013(14)     |
| C26 | 0.0499(16)      | 0.0350(14)      | 0.0360(14)      | -0.0068(11)     | 0.0007(12)      | 0.0007(12)      |
| C27 | 0.057(2)        | 0.074(2)        | 0.0534(18)      | -0.0097(16)     | 0.0079(15)      | -0.0187(17)     |
| C28 | 0.0482(17)      | 0.0431(16)      | 0.0491(16)      | -0.0067(13)     | 0.0055(13)      | -0.0024(13)     |
| C29 | 0.063(2)        | 0.0464(17)      | 0.0621(19)      | -0.0166(14)     | 0.0097(16)      | -0.0127(15)     |
| C30 | 0.072(2)        | 0.0380(16)      | 0.0516(17)      | -0.0102(13)     | 0.0080(15)      | -0.0032(14)     |
| C31 | 0.057(2)        | 0.0404(17)      | 0.065(2)        | -0.0070(15)     | 0.0085(16)      | -0.0049(14)     |
| F1  | 0.1122(17)      | 0.0664(12)      | 0.0648(12)      | -0.0167(10)     | 0.0405(11)      | -0.0282(12)     |
| F2  | 0.0449(11)      | 0.1063(17)      | 0.1051(16)      | -0.0054(13)     | 0.0110(11)      | 0.0083(11)      |
| F3  | 0.0848(14)      | 0.0456(11)      | 0.0901(14)      | -0.0012(9)      | 0.0140(11)      | -0.0102(9)      |



|      | U <sub>11</sub> | U <sub>22</sub> | U <sub>33</sub> | U <sub>23</sub> | U <sub>13</sub> | U <sub>12</sub> |
|------|-----------------|-----------------|-----------------|-----------------|-----------------|-----------------|
| N1   | 0.0473(13)      | 0.0420(13)      | 0.0316(11)      | -0.0091(9)      | 0.0033(10)      | 0.0071(10)      |
| N2   | 0.0397(13)      | 0.0440(14)      | 0.0443(13)      | -0.0114(11)     | 0.0075(10)      | -0.0018(11)     |
| N3   | 0.0530(16)      | 0.0398(14)      | 0.0705(19)      | -0.0035(13)     | -0.0109(14)     | 0.0058(12)      |
| O1   | 0.0332(10)      | 0.0539(12)      | 0.0682(13)      | -0.0139(10)     | -0.0045(9)      | 0.0034(9)       |
| O2   | 0.0784(15)      | 0.0605(13)      | 0.0528(12)      | -0.0243(10)     | -0.0255(11)     | 0.0062(11)      |
| O3   | 0.0648(14)      | 0.0404(12)      | 0.0654(13)      | -0.0193(10)     | 0.0169(11)      | -0.0013(10)     |
| O4   | 0.0468(12)      | 0.0678(14)      | 0.0809(15)      | -0.0157(12)     | 0.0265(11)      | -0.0190(11)     |
| O5   | 0.0846(17)      | 0.0603(15)      | 0.0666(16)      | 0.0117(12)      | -0.0116(13)     | 0.0096(12)      |
| O6   | 0.0579(14)      | 0.0648(15)      | 0.0999(18)      | -0.0078(13)     | -0.0025(13)     | 0.0261(12)      |
| O7   | 0.0706(14)      | 0.0654(14)      | 0.0495(12)      | -0.0183(10)     | 0.0231(11)      | -0.0172(11)     |
| S1   | 0.0421(4)       | 0.0446(4)       | 0.0447(4)       | -0.0147(3)      | -0.0089(3)      | 0.0063(3)       |
| O8A  | 0.097(3)        | 0.073(5)        | 0.144(4)        | 0.013(4)        | 0.032(3)        | 0.011(3)        |
| C32A | 0.109(6)        | 0.078(6)        | 0.206(11)       | 0.011(6)        | 0.014(6)        | -0.018(4)       |
| C33A | 0.124(7)        | 0.096(6)        | 0.303(16)       | 0.053(8)        | 0.029(8)        | 0.021(5)        |
| C34A | 0.096(5)        | 0.103(6)        | 0.243(12)       | -0.018(7)       | 0.035(6)        | 0.011(4)        |
| C35A | 0.101(5)        | 0.079(4)        | 0.194(11)       | -0.008(5)       | 0.030(6)        | -0.013(4)       |
| O8B  | 0.097(3)        | 0.073(5)        | 0.144(4)        | 0.013(4)        | 0.032(3)        | 0.011(3)        |
| C32B | 0.094(9)        | 0.092(8)        | 0.138(12)       | 0.027(7)        | 0.049(8)        | 0.021(6)        |
| C33B | 0.100(9)        | 0.112(9)        | 0.160(14)       | 0.022(8)        | 0.050(9)        | 0.030(6)        |
| C34B | 0.096(7)        | 0.123(10)       | 0.162(13)       | 0.025(9)        | 0.025(7)        | 0.016(7)        |
| C35B | 0.101(8)        | 0.117(11)       | 0.154(14)       | 0.044(11)       | 0.032(7)        | 0.002(7)        |

**Table S18. Hydrogen atomic coordinates and isotropic atomic displacement parameters (Å<sup>2</sup>) for 5.**

|     | x/a    | y/b    | z/c    | U(eq)    |
|-----|--------|--------|--------|----------|
| H3  | 0.5603 | 0.7849 | 0.6373 | 0.048000 |
| H5  | 0.2291 | 0.8427 | 0.8029 | 0.056000 |
| H6  | 0.4952 | 0.7375 | 0.8598 | 0.054000 |
| H7A | 0.4156 | 0.5327 | 0.8770 | 0.060000 |
| H7B | 0.5885 | 0.5646 | 0.9274 | 0.060000 |
| H9  | 0.8640 | 0.4149 | 0.9753 | 0.059000 |
| H10 | 0.8556 | 0.2645 | 1.0316 | 0.072000 |
| H11 | 0.5514 | 0.1725 | 1.0229 | 0.086000 |
| H12 | 0.2506 | 0.2334 | 0.9594 | 0.102000 |
| H13 | 0.2539 | 0.3853 | 0.9038 | 0.080000 |
| H15 | 0.4117 | 0.5017 | 0.7661 | 0.046000 |
| H16 | 0.3875 | 0.3992 | 0.6829 | 0.047000 |
| H18 | 1.0044 | 0.2707 | 0.7248 | 0.053000 |
| H19 | 1.0290 | 0.3716 | 0.8089 | 0.049000 |
| H20 | 0.5316 | 0.2799 | 0.6171 | 0.051000 |
| H22 | 0.9125 | 0.4126 | 0.6070 | 0.052000 |
| H23 | 1.1991 | 0.4377 | 0.5321 | 0.052000 |

|      | x/a     | y/b    | z/c    | U(eq)    |
|------|---------|--------|--------|----------|
| H25  | 1.1579  | 0.1635 | 0.4774 | 0.057000 |
| H27A | 1.6291  | 0.3802 | 0.4181 | 0.091000 |
| H27B | 1.5752  | 0.3948 | 0.4917 | 0.091000 |
| H27C | 1.4126  | 0.4479 | 0.4384 | 0.091000 |
| H28  | 0.8176  | 0.1259 | 0.6796 | 0.056000 |
| H29A | 0.6300  | 0.0228 | 0.6113 | 0.068000 |
| H29B | 0.5138  | 0.1190 | 0.5749 | 0.068000 |
| H30A | 0.8131  | 0.0788 | 0.5131 | 0.064000 |
| H30B | 0.9718  | 0.0502 | 0.5728 | 0.064000 |
| H32A | 0.1987  | 1.0688 | 0.9123 | 0.158000 |
| H32B | 0.2122  | 1.0446 | 0.8386 | 0.158000 |
| H33A | -0.1250 | 1.0954 | 0.8229 | 0.215000 |
| H33B | -0.1030 | 1.1504 | 0.8873 | 0.215000 |
| H34A | -0.2901 | 1.0327 | 0.9490 | 0.178000 |
| H34B | -0.4056 | 1.0188 | 0.8817 | 0.178000 |
| H35A | -0.1631 | 0.8809 | 0.9373 | 0.150000 |
| H35B | -0.1752 | 0.8936 | 0.8612 | 0.150000 |
| H32C | 0.1622  | 1.1088 | 0.8579 | 0.134000 |
| H32D | 0.0356  | 1.0515 | 0.8070 | 0.134000 |
| H33C | -0.2445 | 1.1443 | 0.8563 | 0.154000 |
| H33D | -0.1501 | 1.1042 | 0.9265 | 0.154000 |
| H34C | -0.3829 | 0.9835 | 0.8779 | 0.156000 |
| H34D | -0.1830 | 0.9721 | 0.8253 | 0.156000 |
| H35C | -0.1013 | 0.9566 | 0.9610 | 0.153000 |
| H35D | -0.0833 | 0.8631 | 0.9173 | 0.153000 |

**Table S19. Hydrogen bond distances (Å) and angles (°) for 5.**

|                          | Donor-H | Acceptor-H | Donor-Acceptor | Angle |
|--------------------------|---------|------------|----------------|-------|
| C3-H3...O7#2             | 0.94    | 2.33       | 3.098(3)       | 138.4 |
| C5-H5...O8A <sup>a</sup> | 0.94    | 2.48       | 3.314(11)      | 148.5 |
| C5-H5...O8B <sup>b</sup> | 0.94    | 2.56       | 3.37(3)        | 145.0 |
| C7-H7B...O2              | 0.98    | 2.38       | 2.870(4)       | 110.1 |
| C15-H15...O1#1           | 0.94    | 2.36       | 3.286(3)       | 167.7 |

# 11. NMR spectra

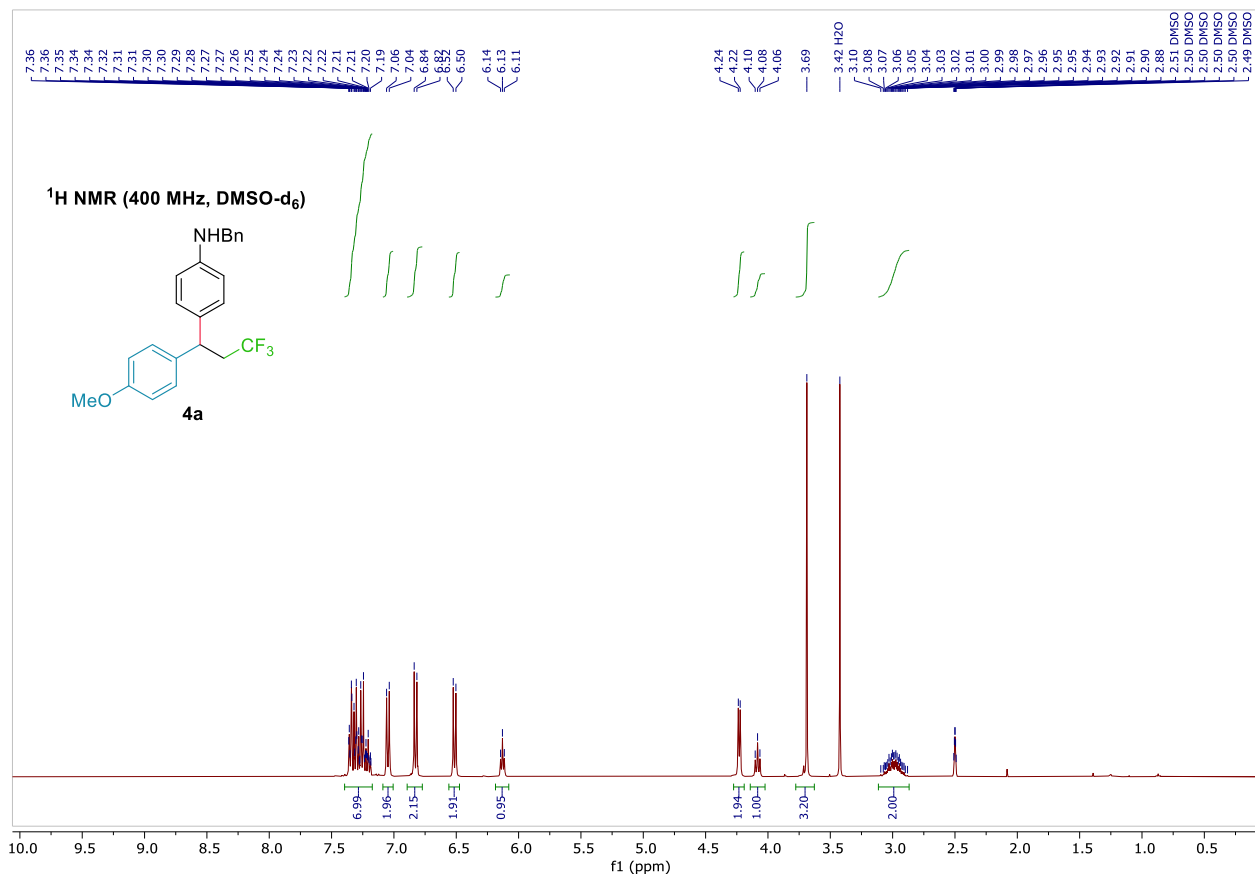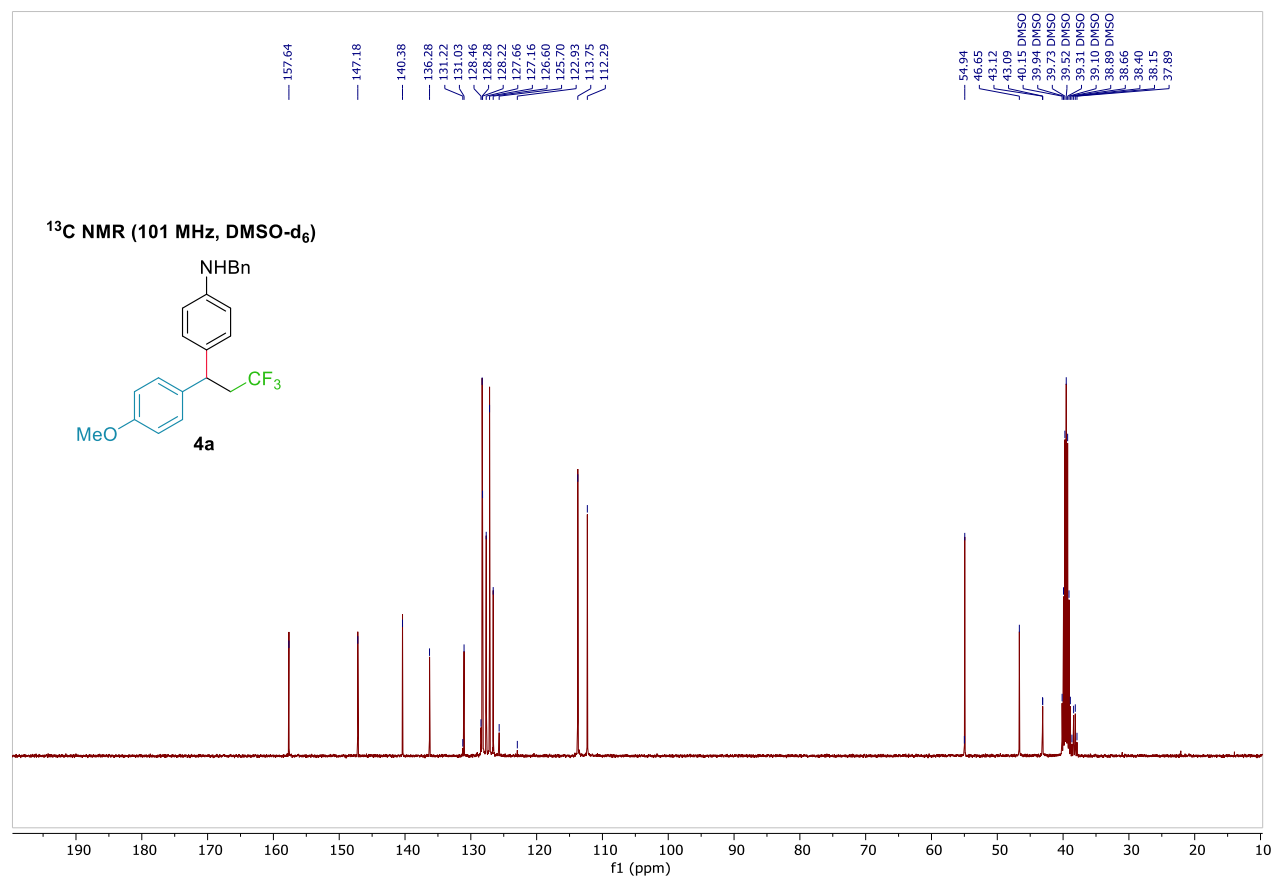

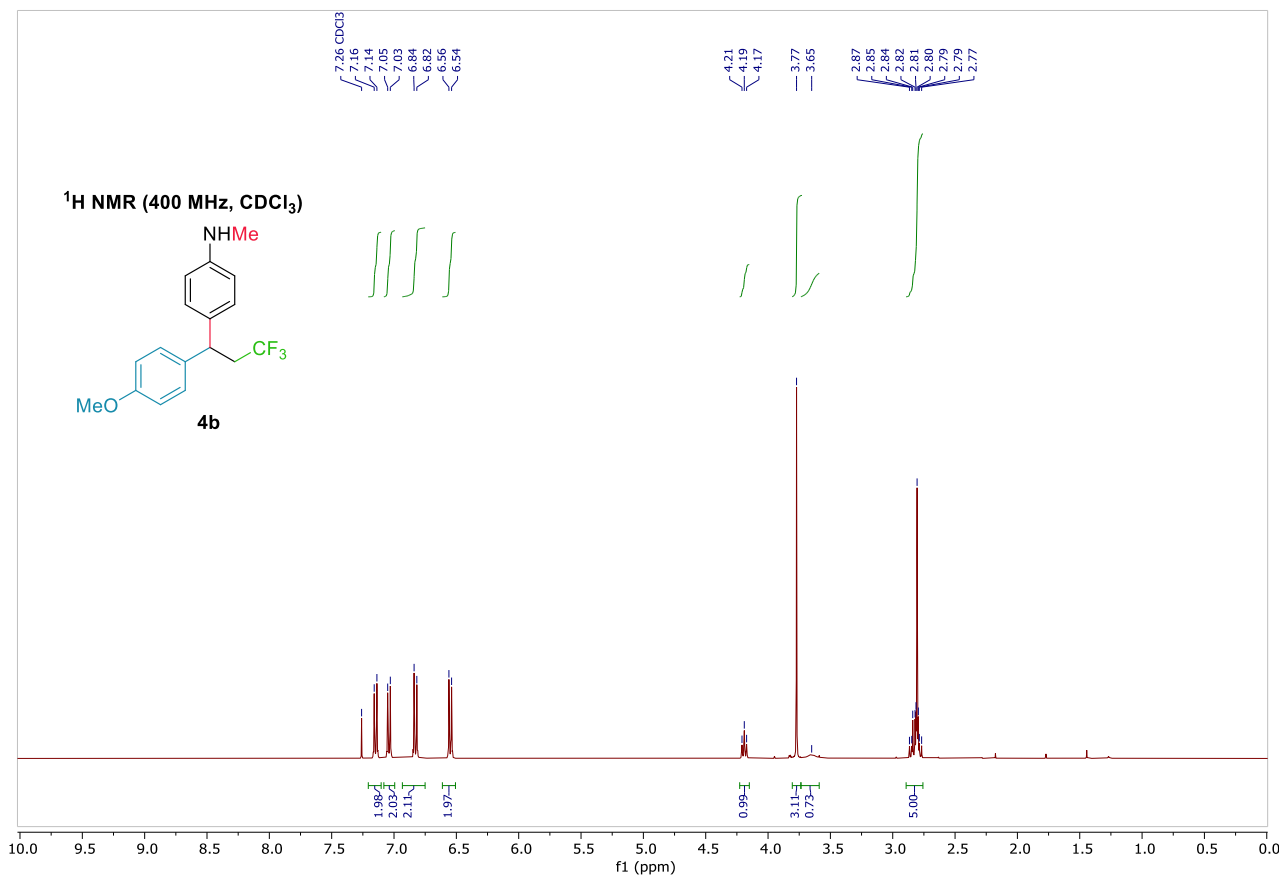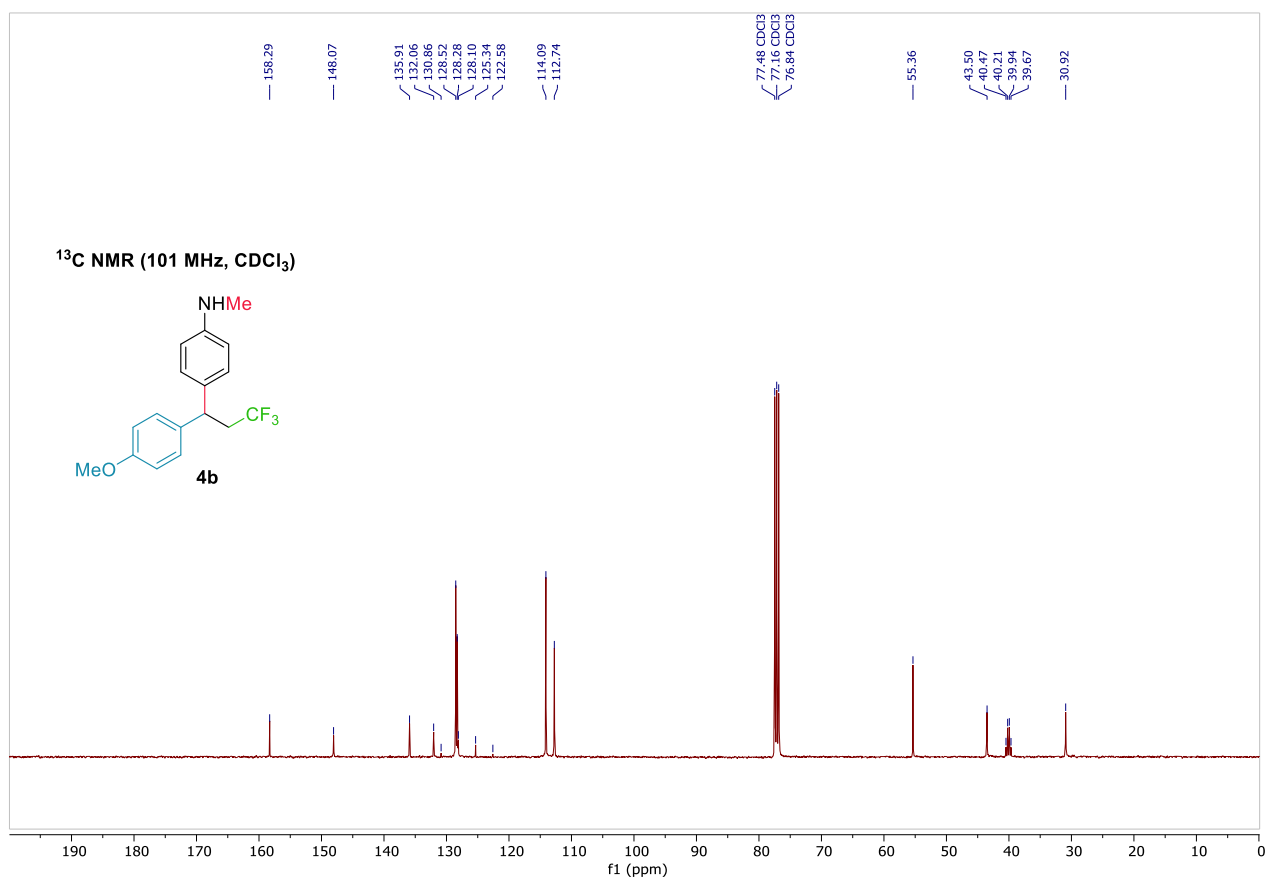

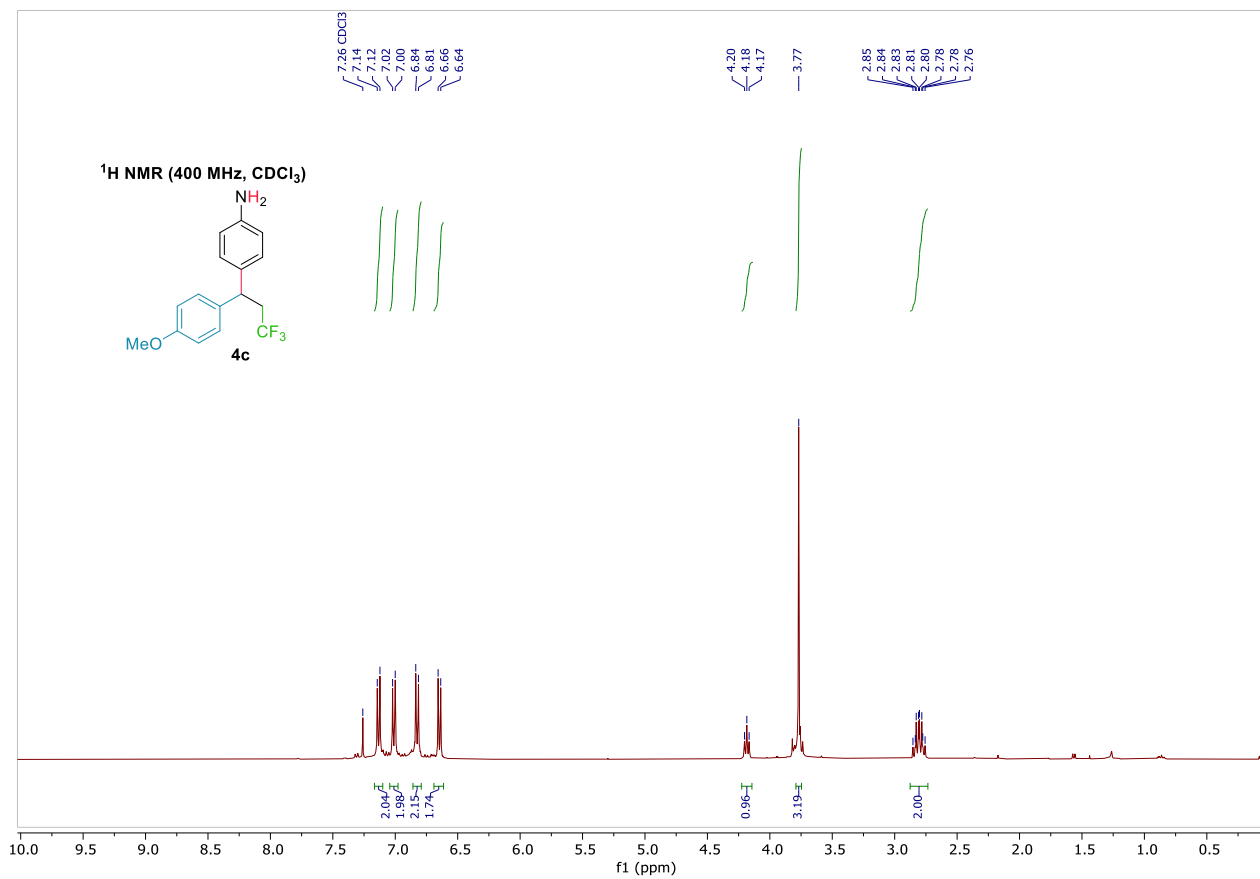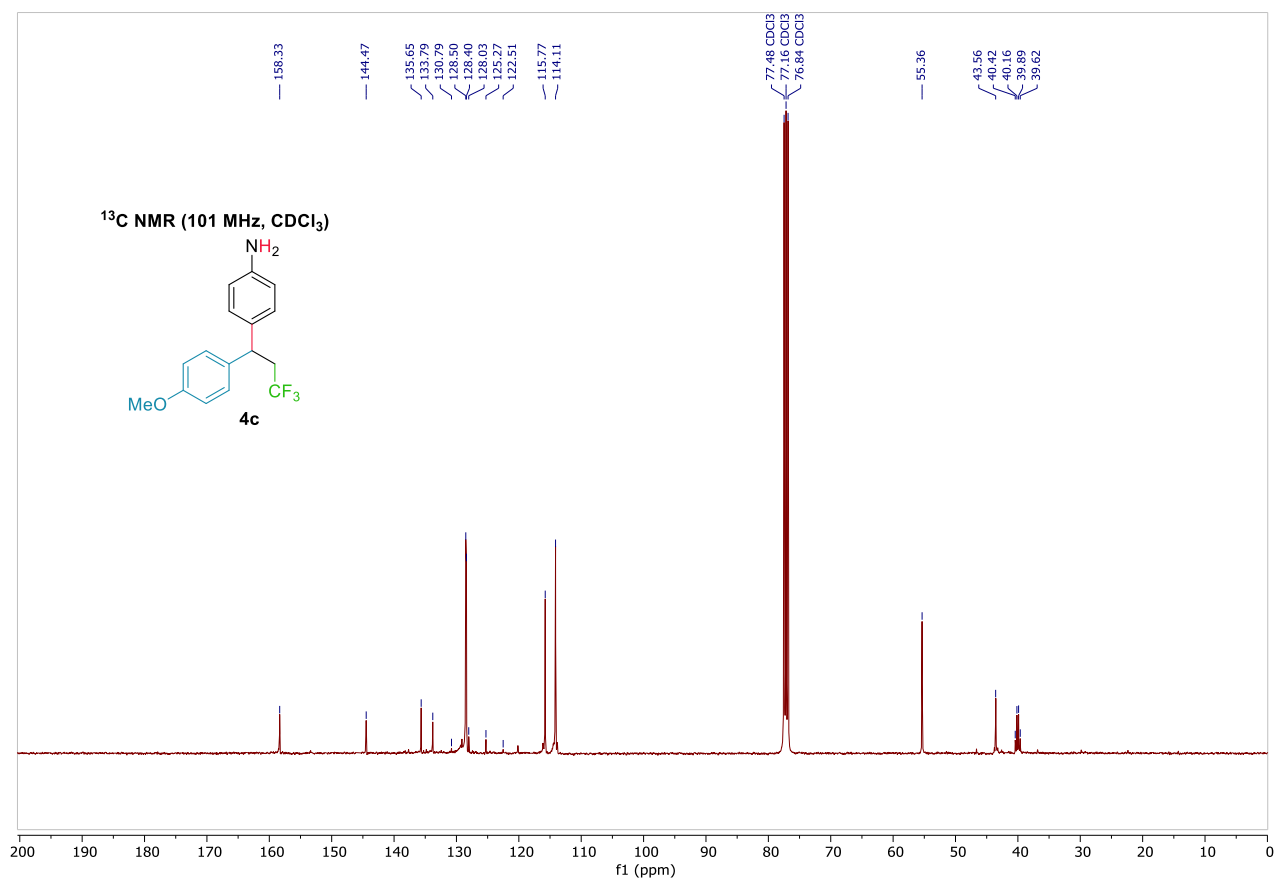

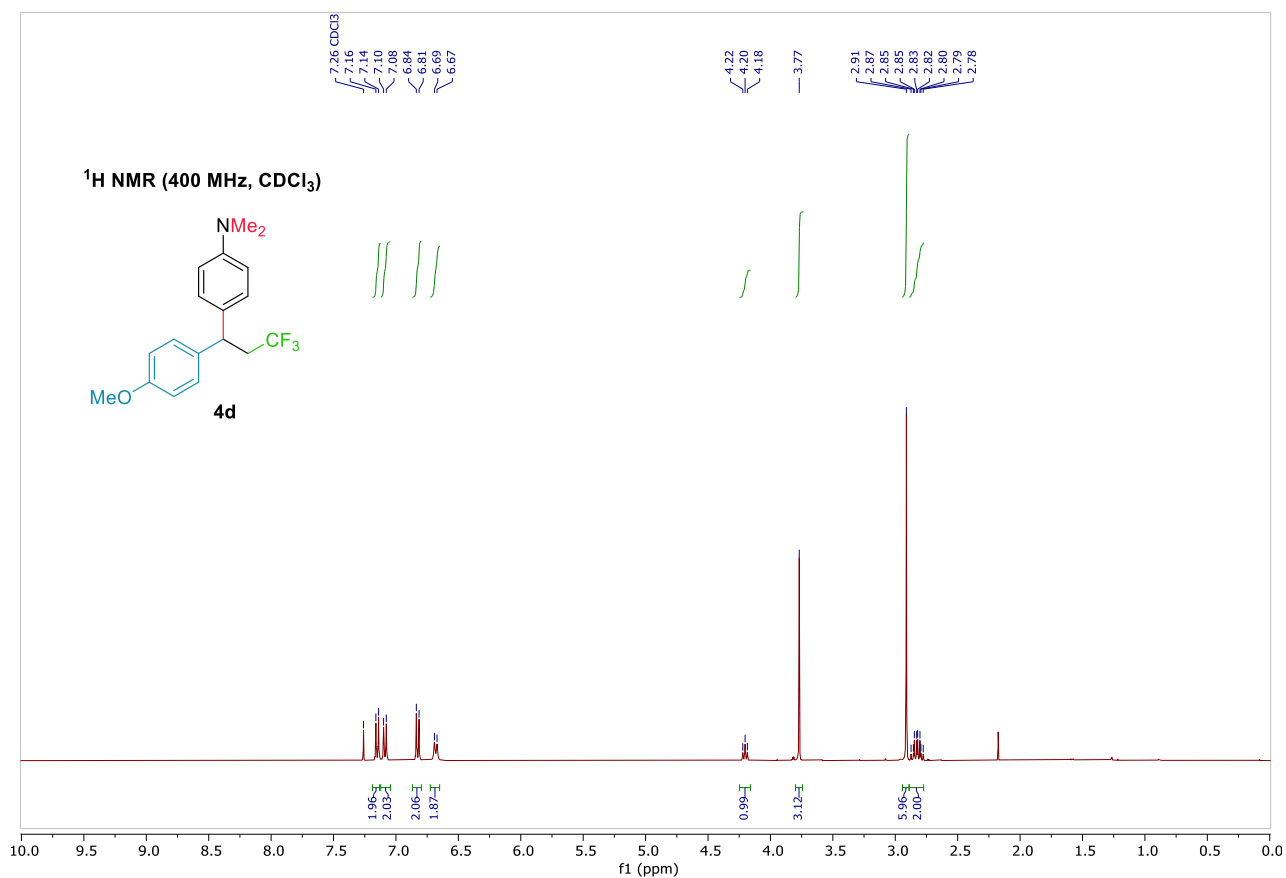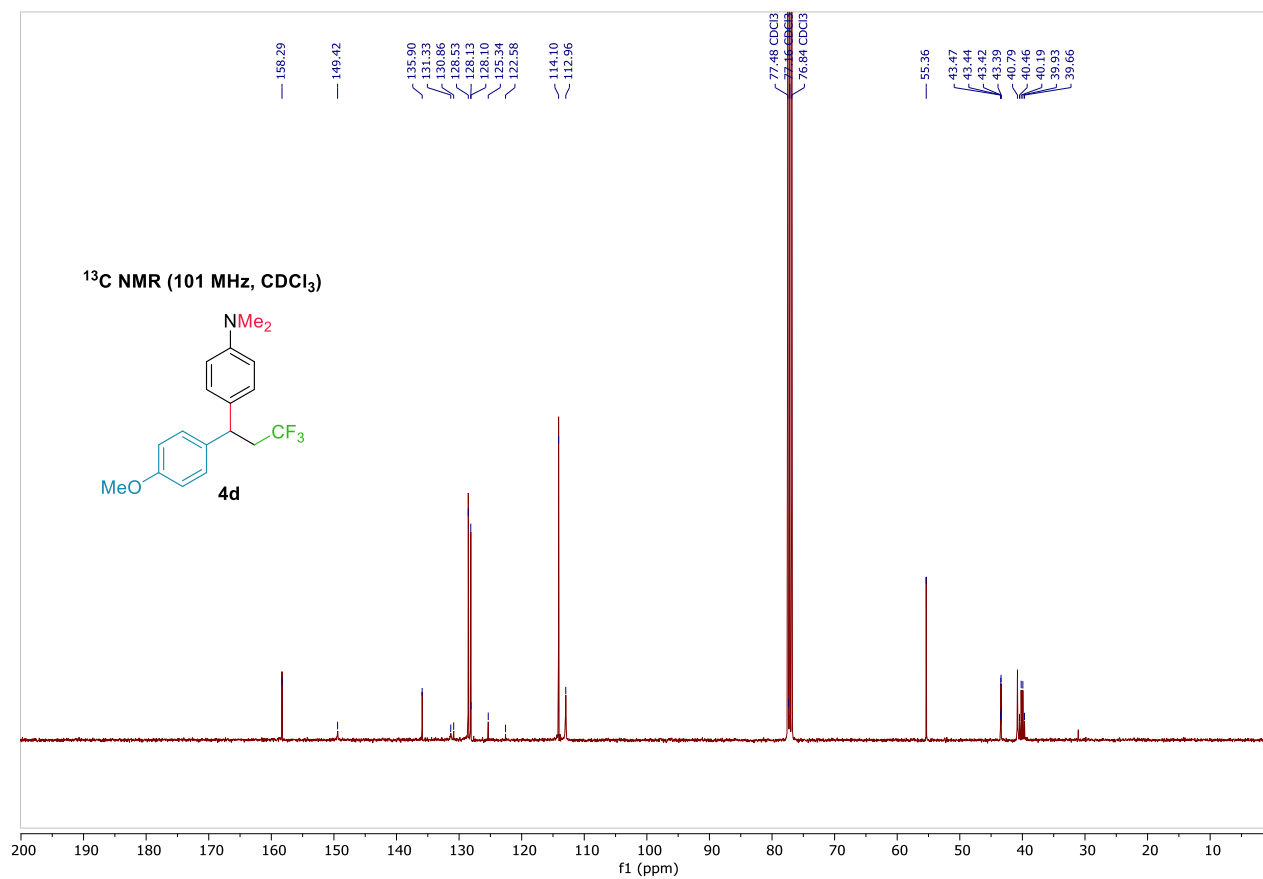

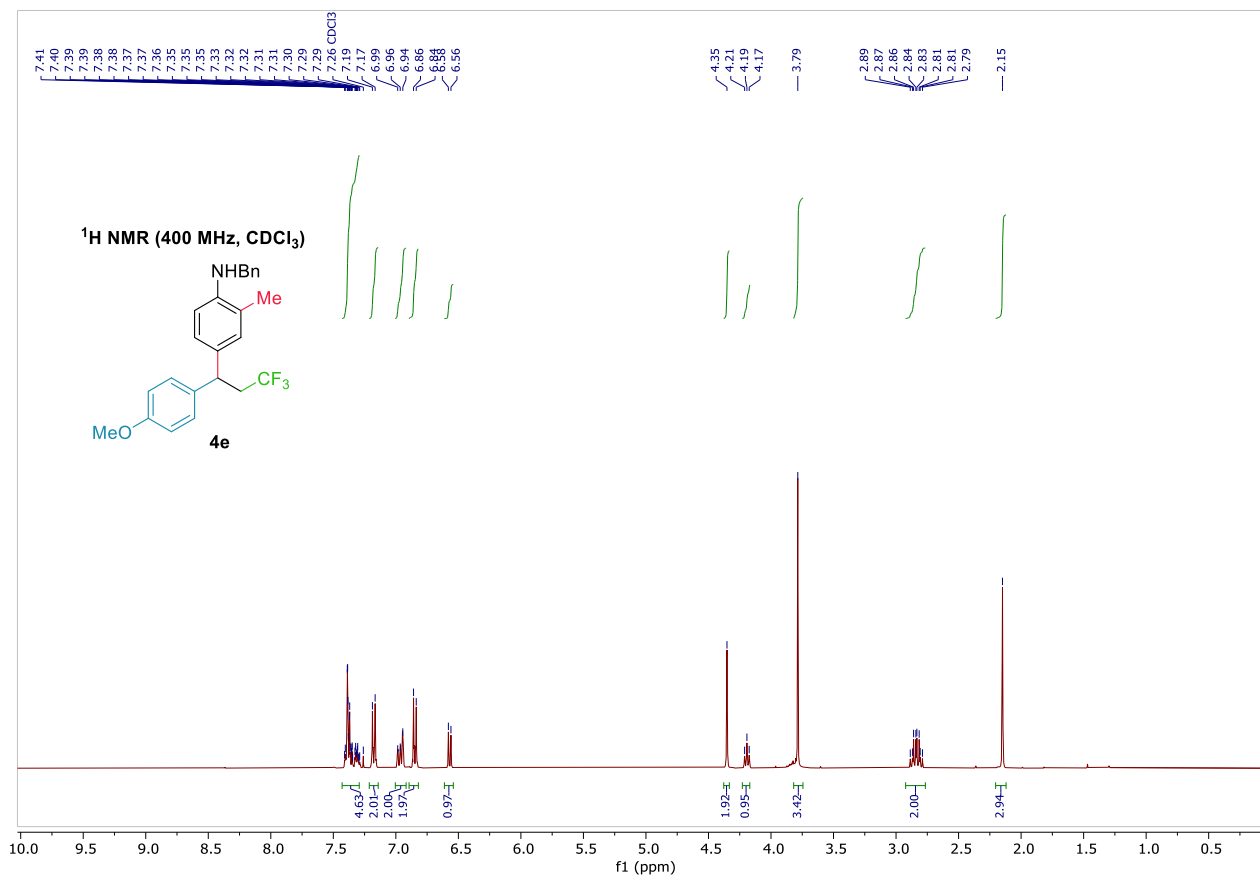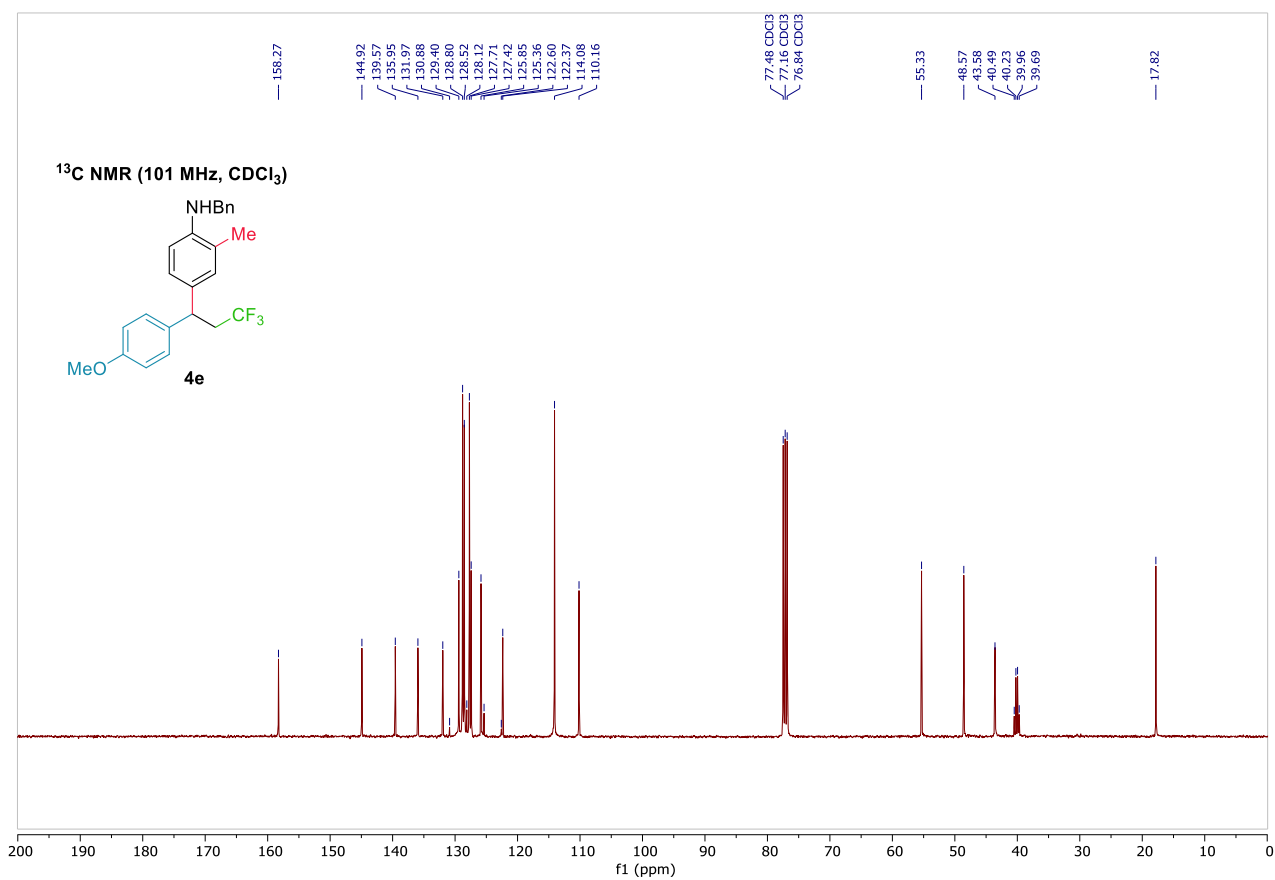

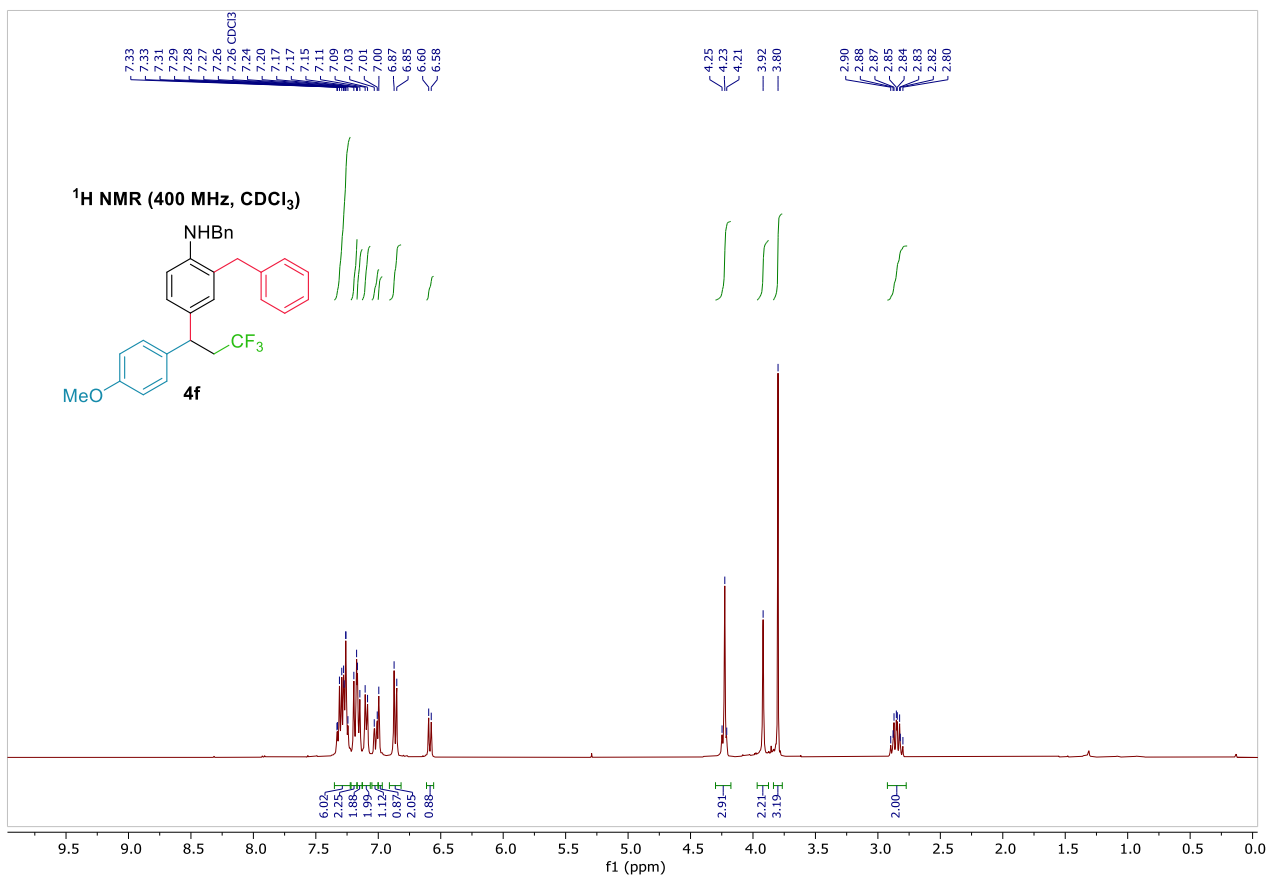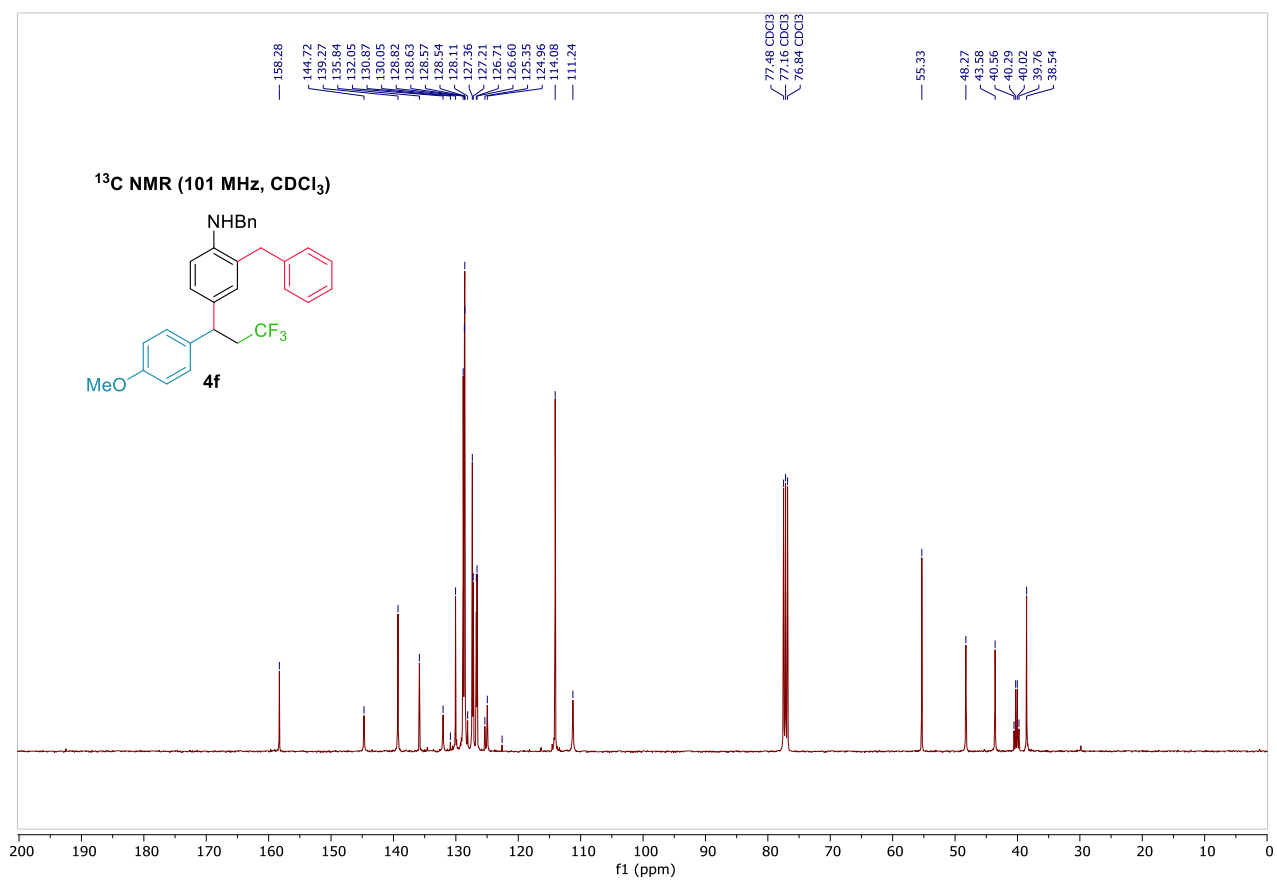



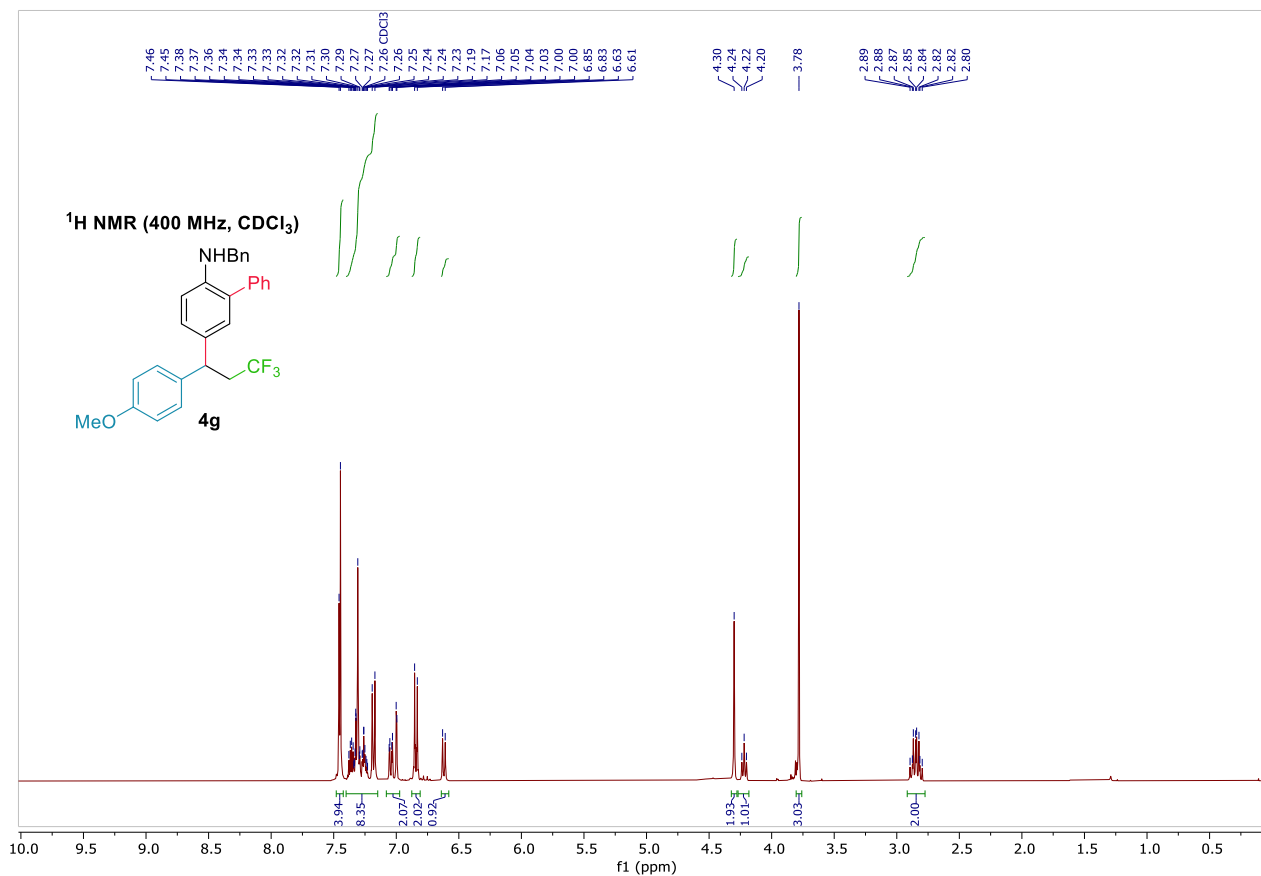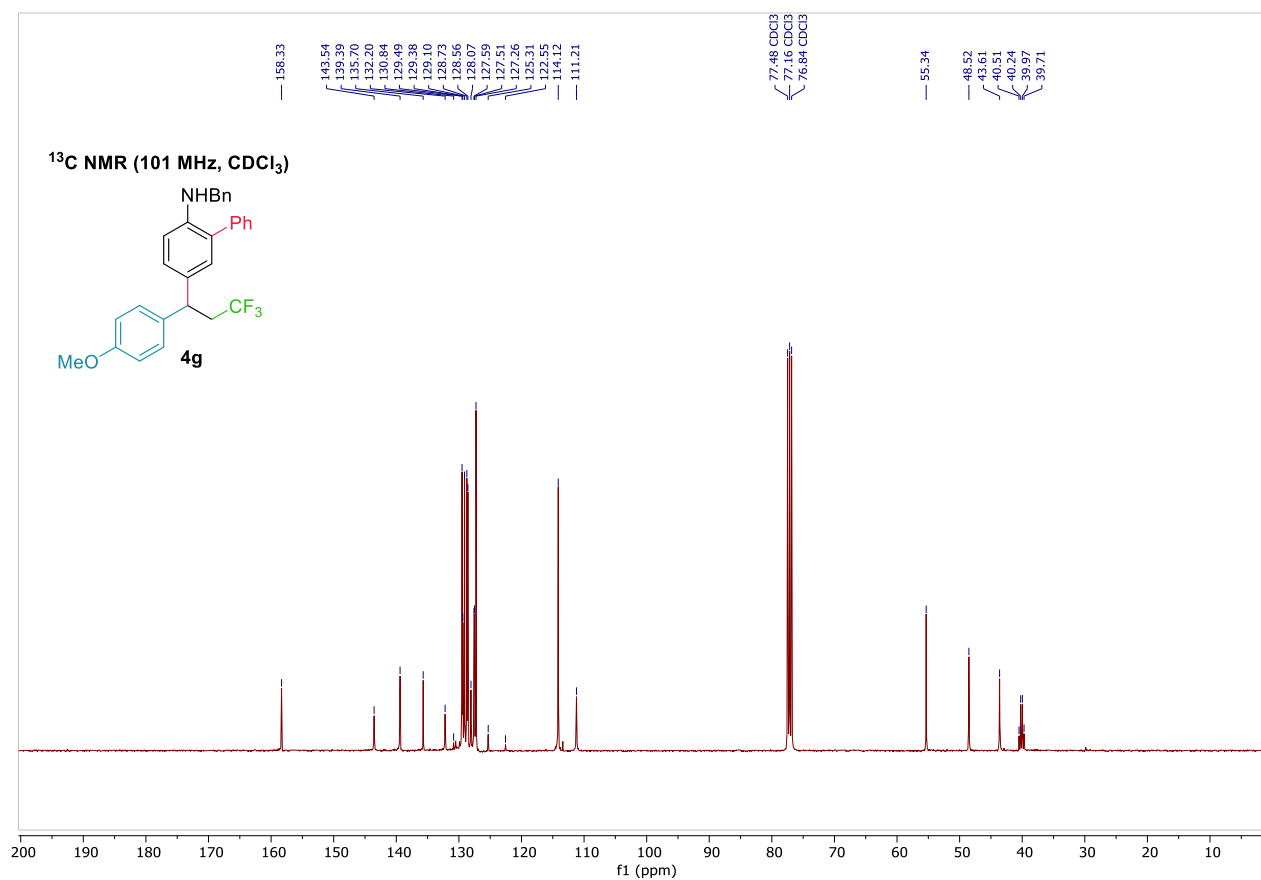

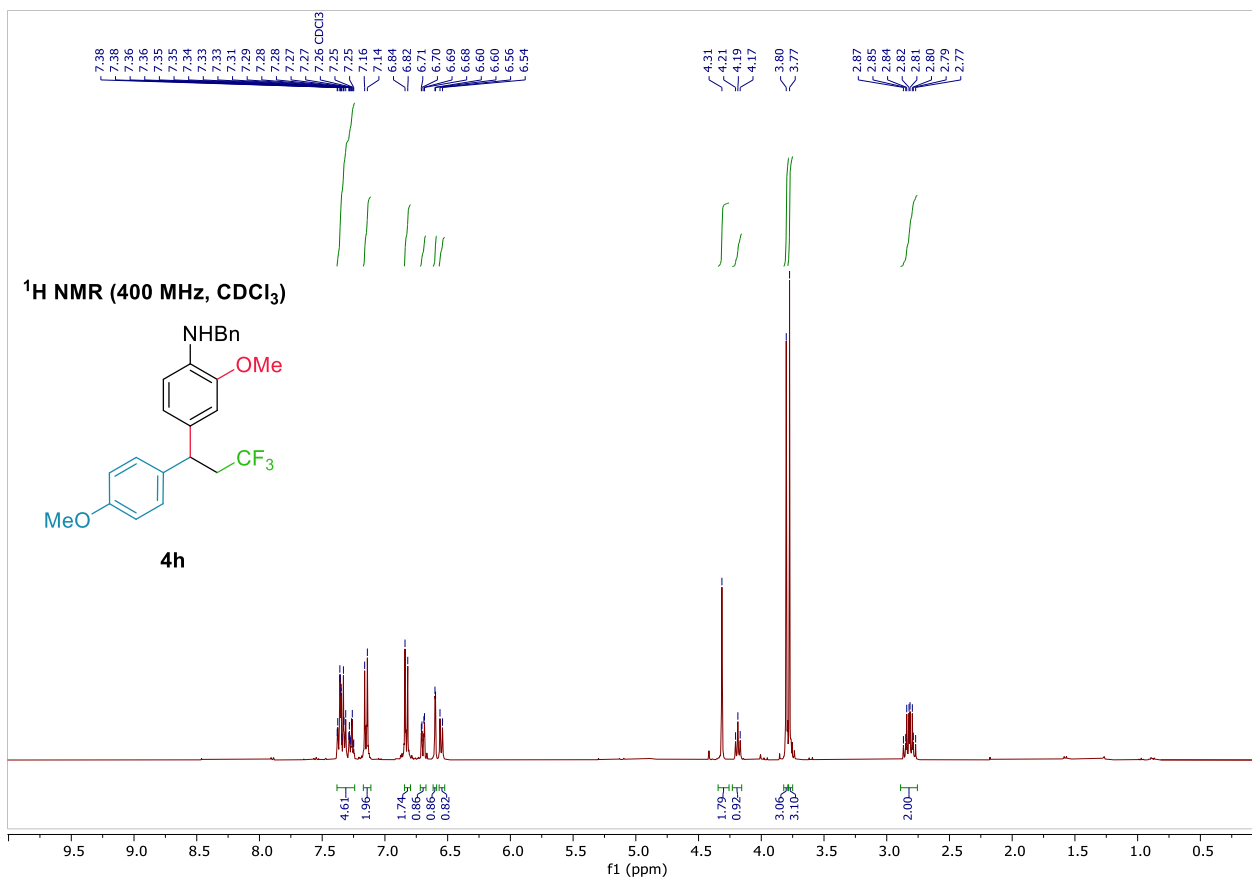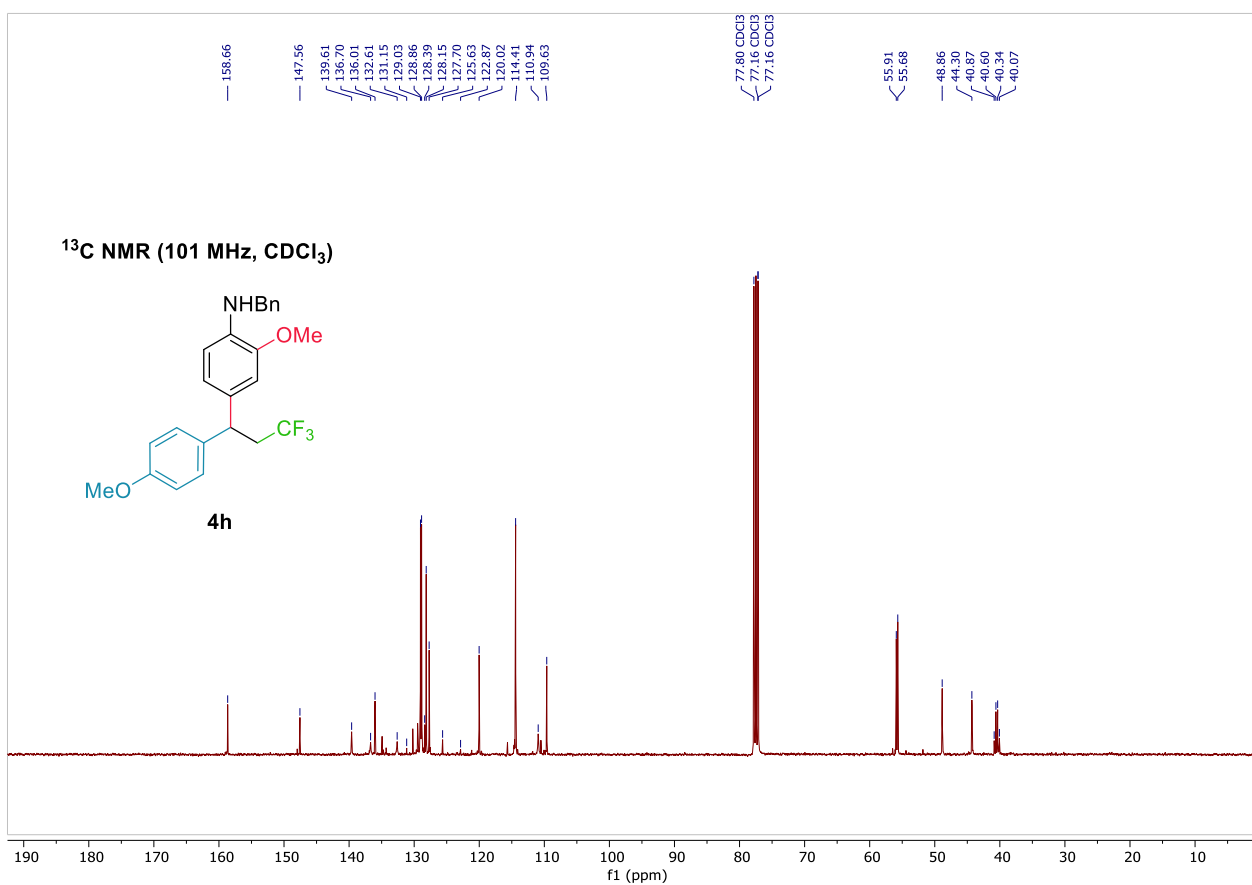

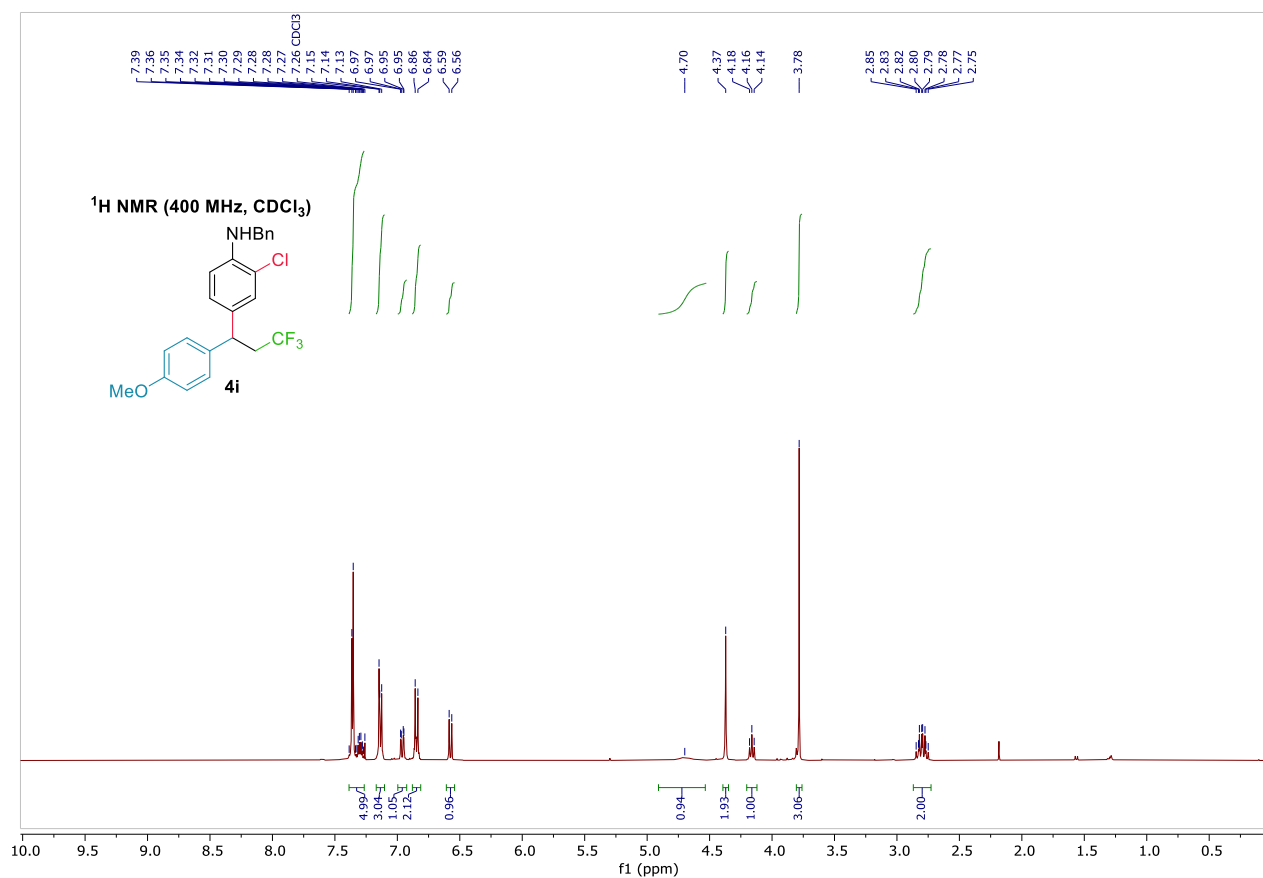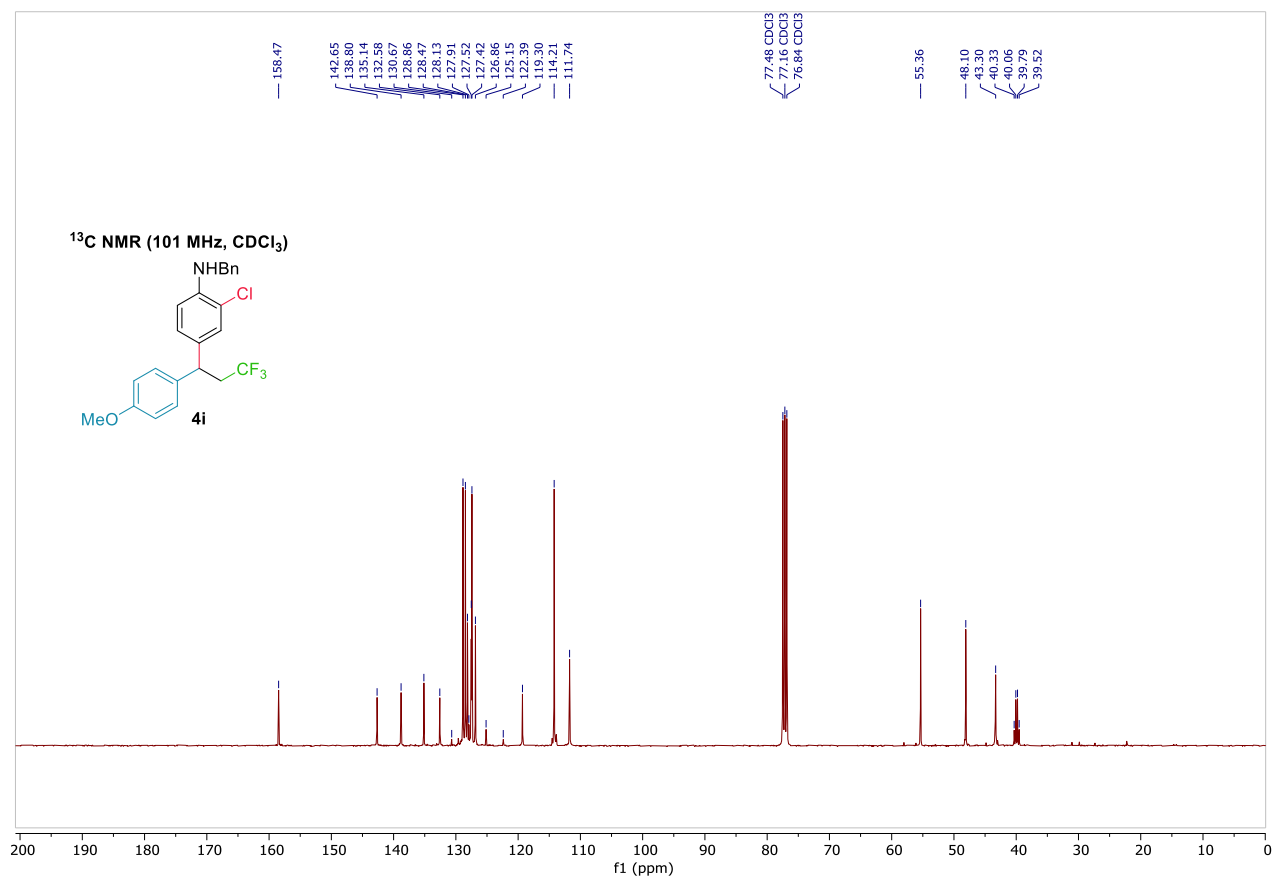

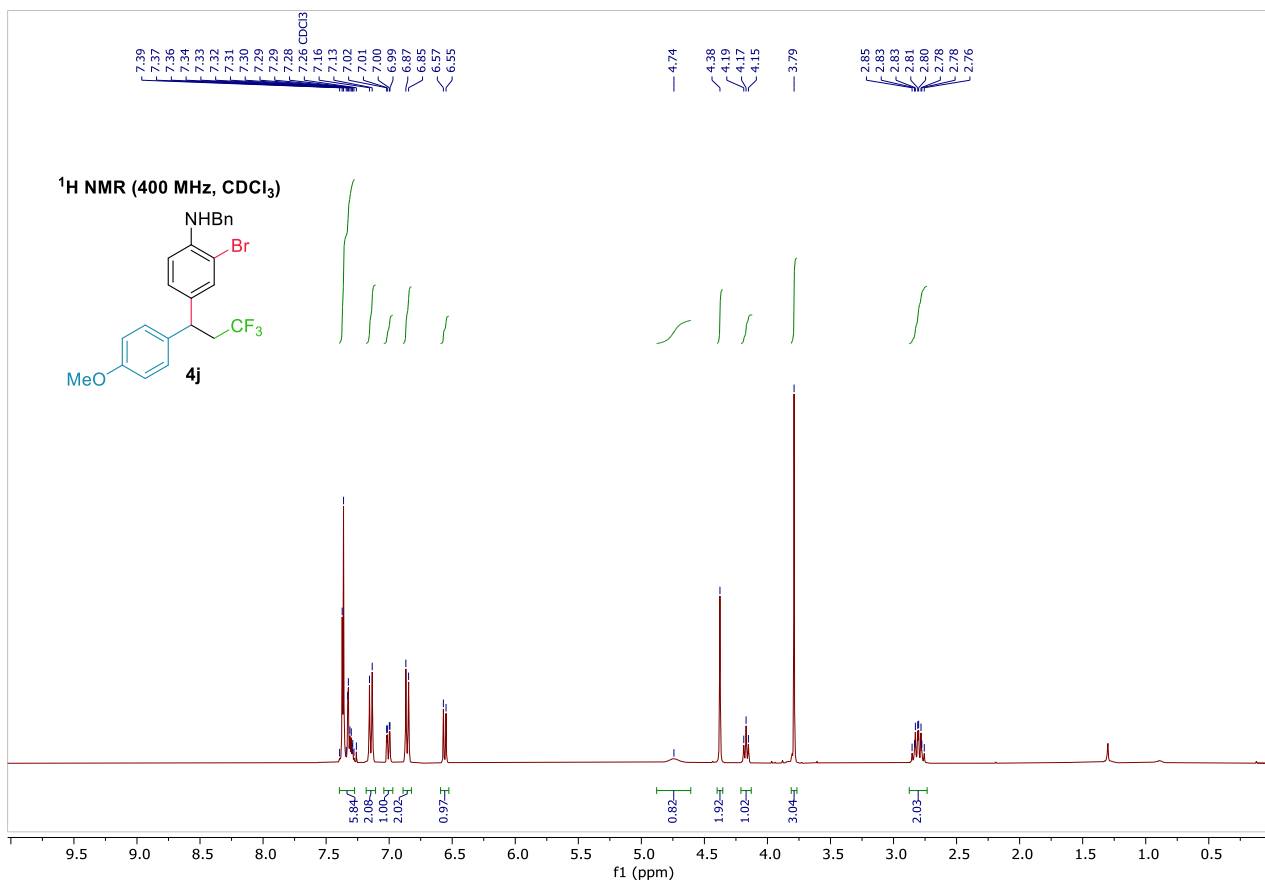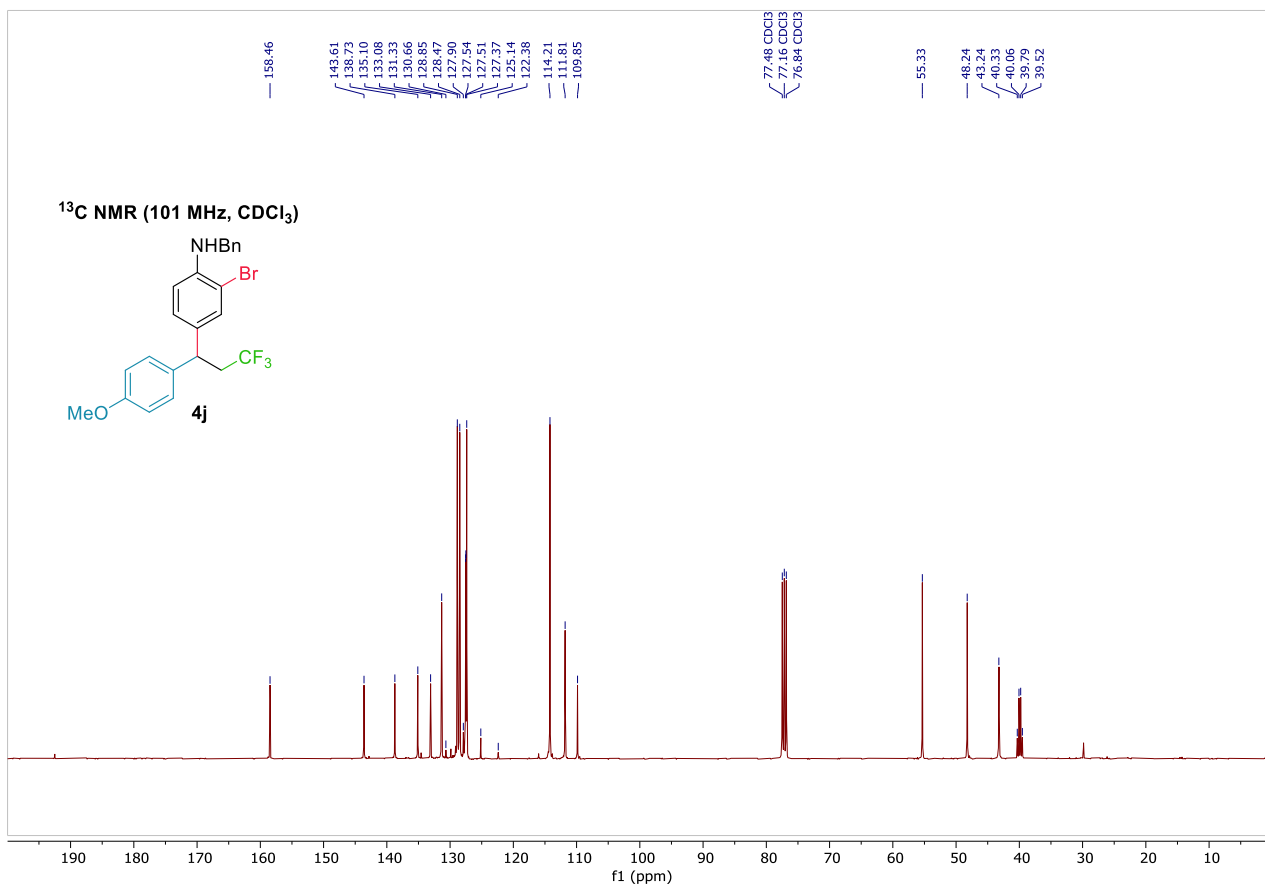

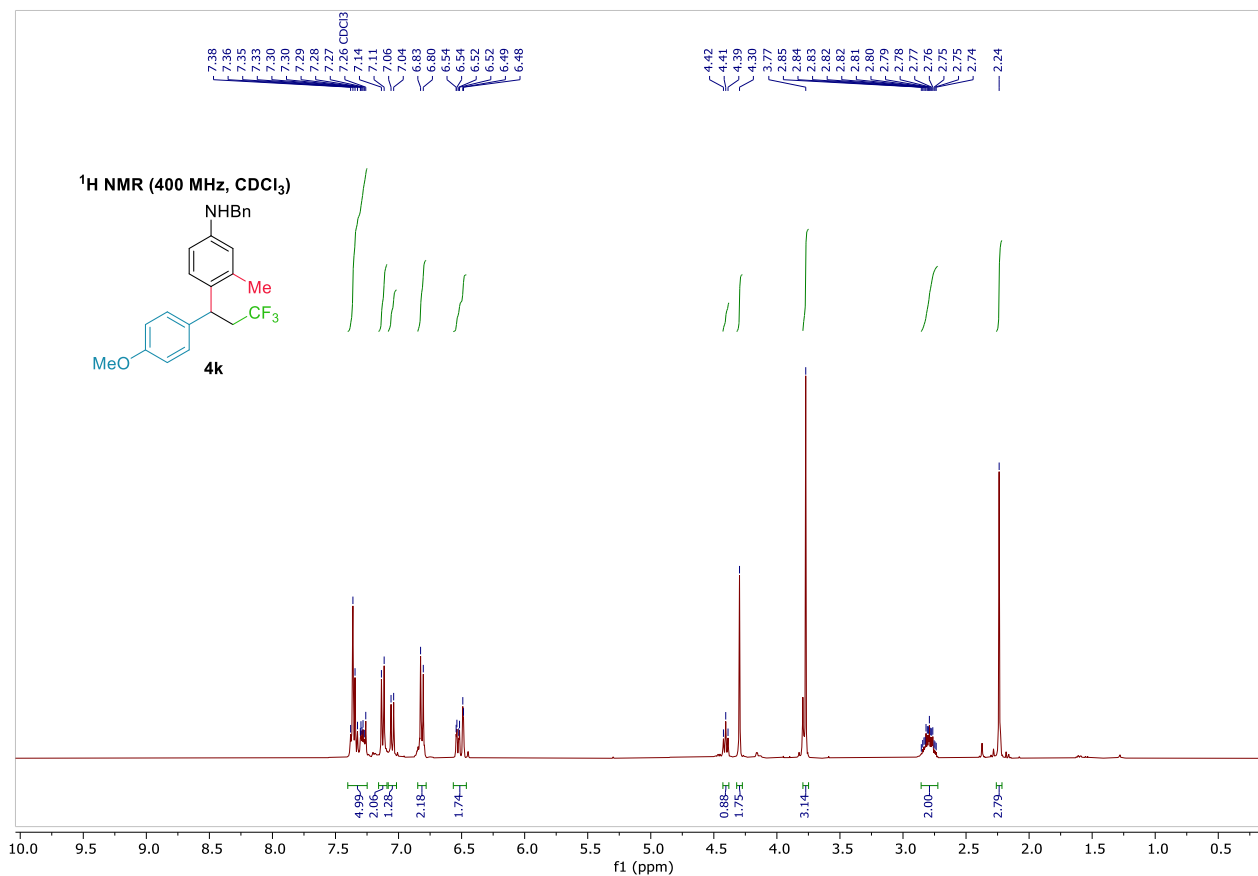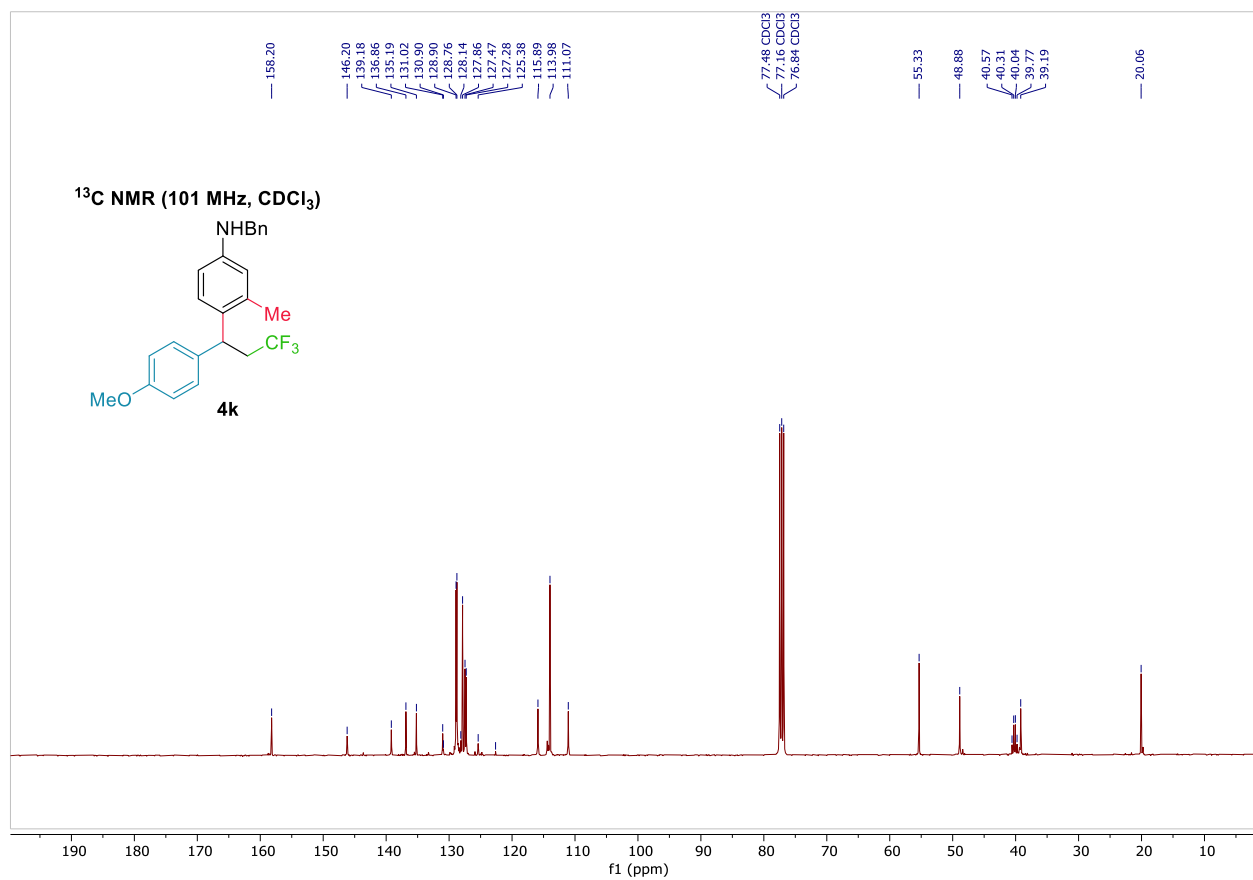

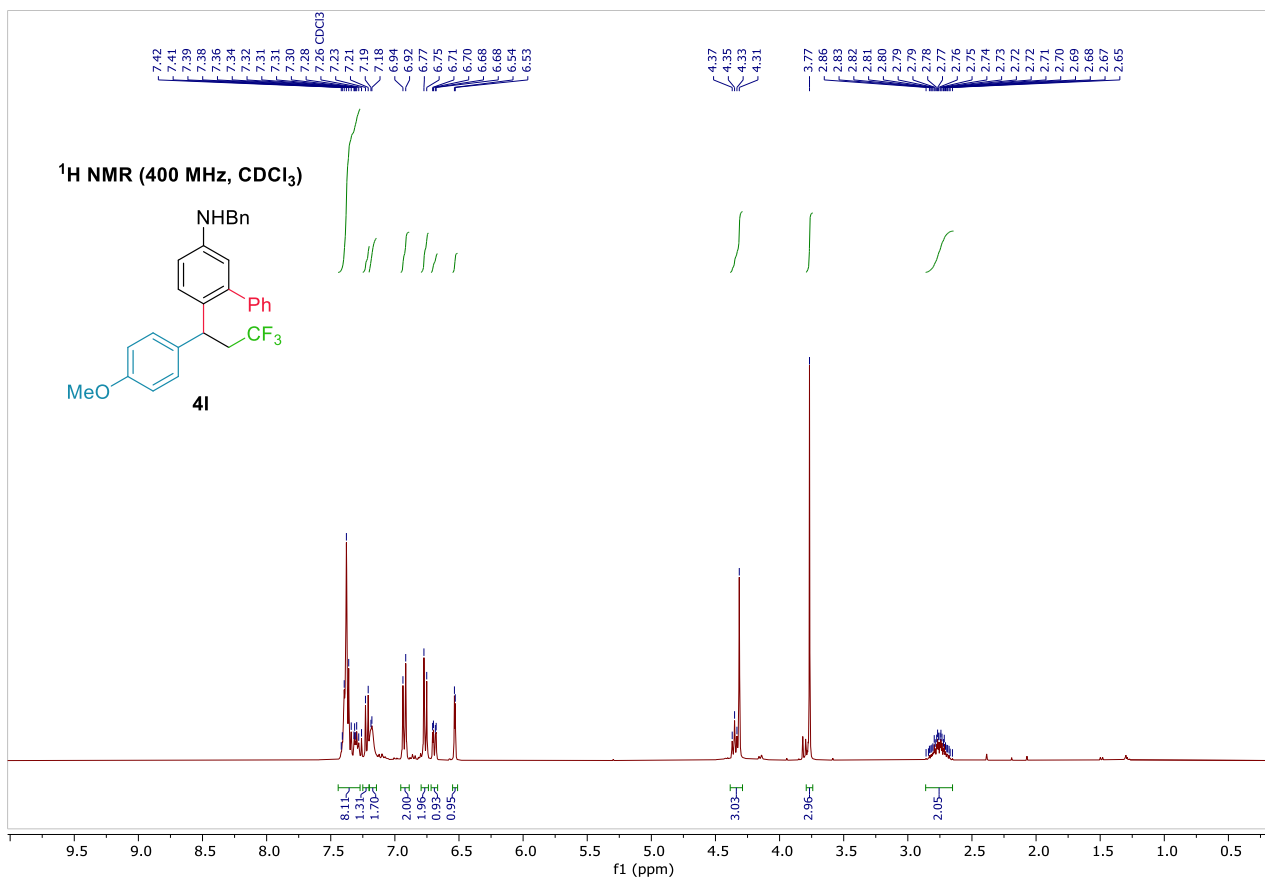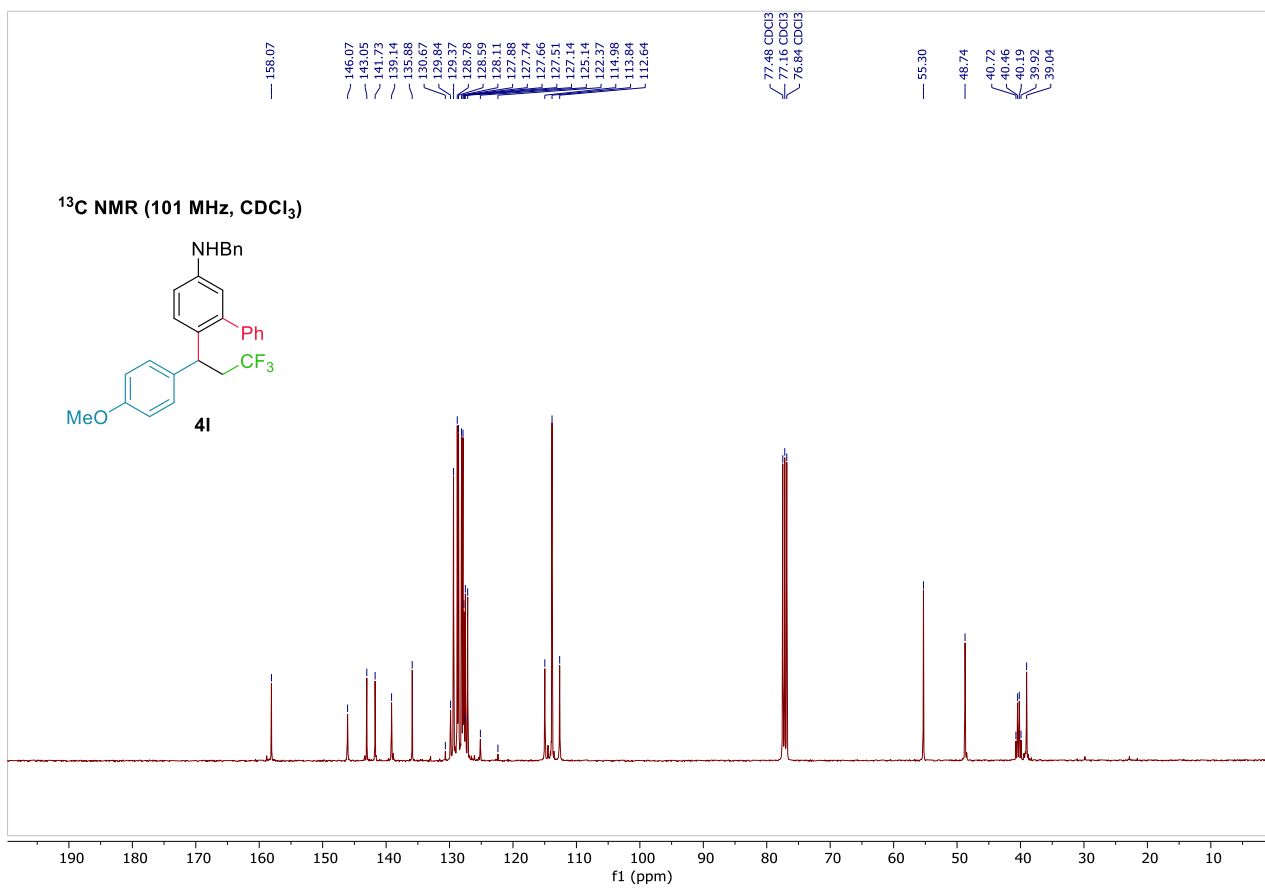

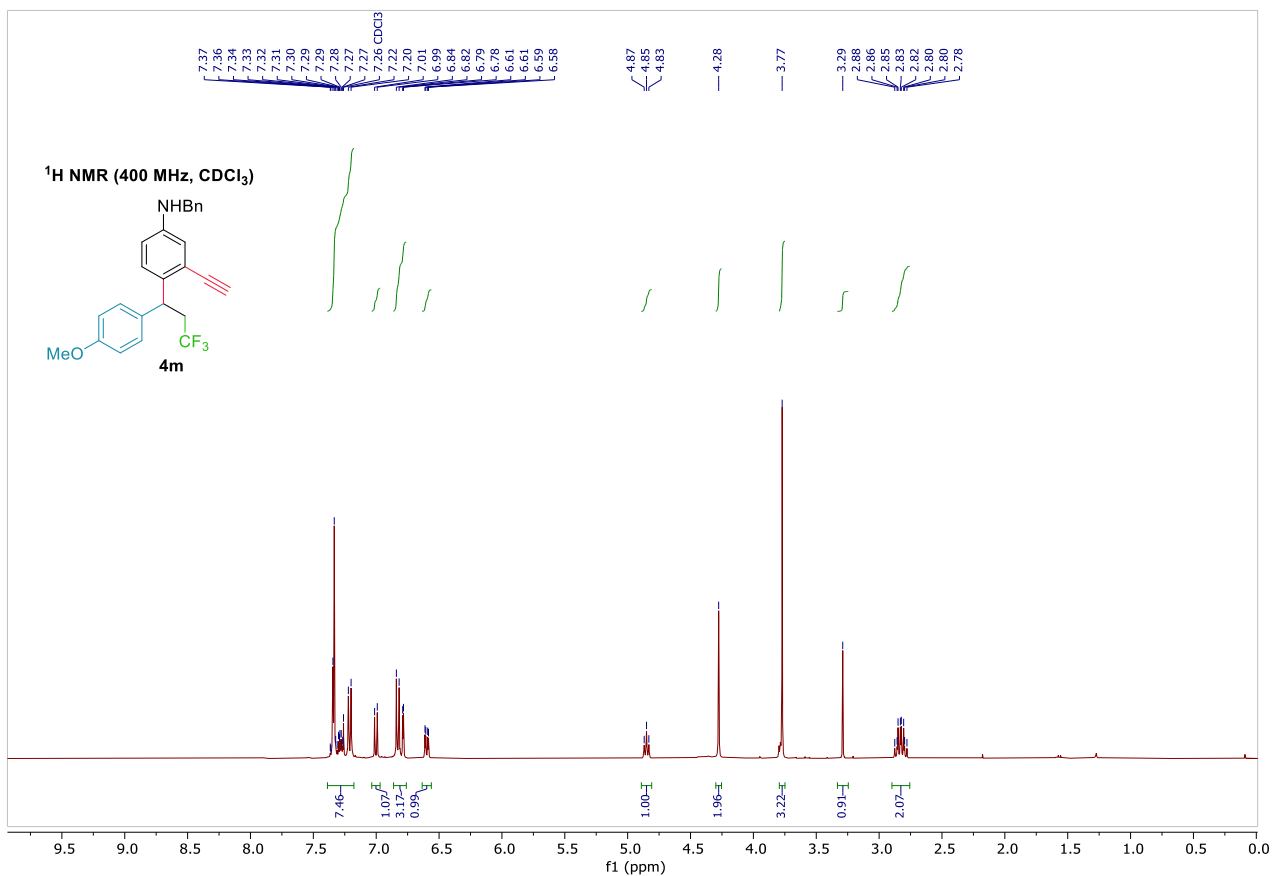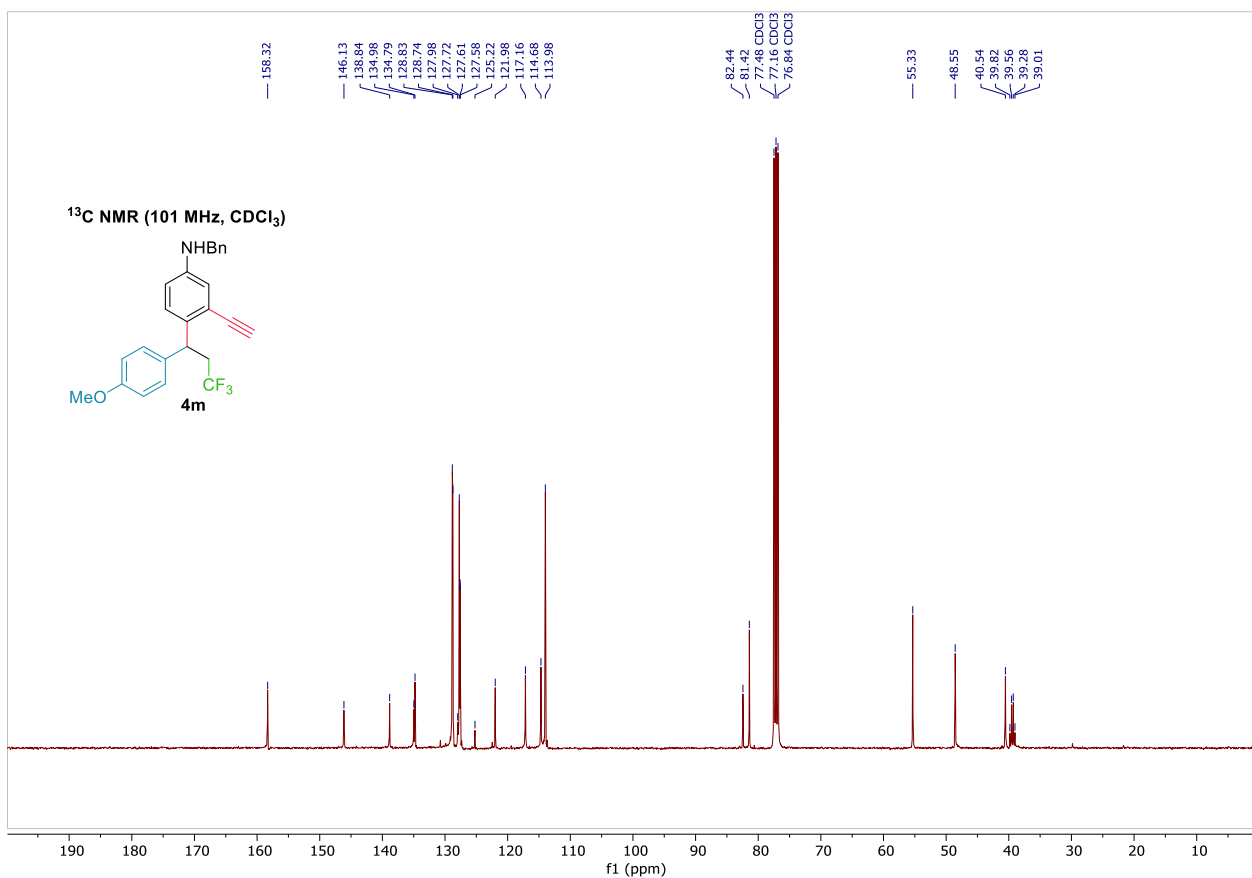

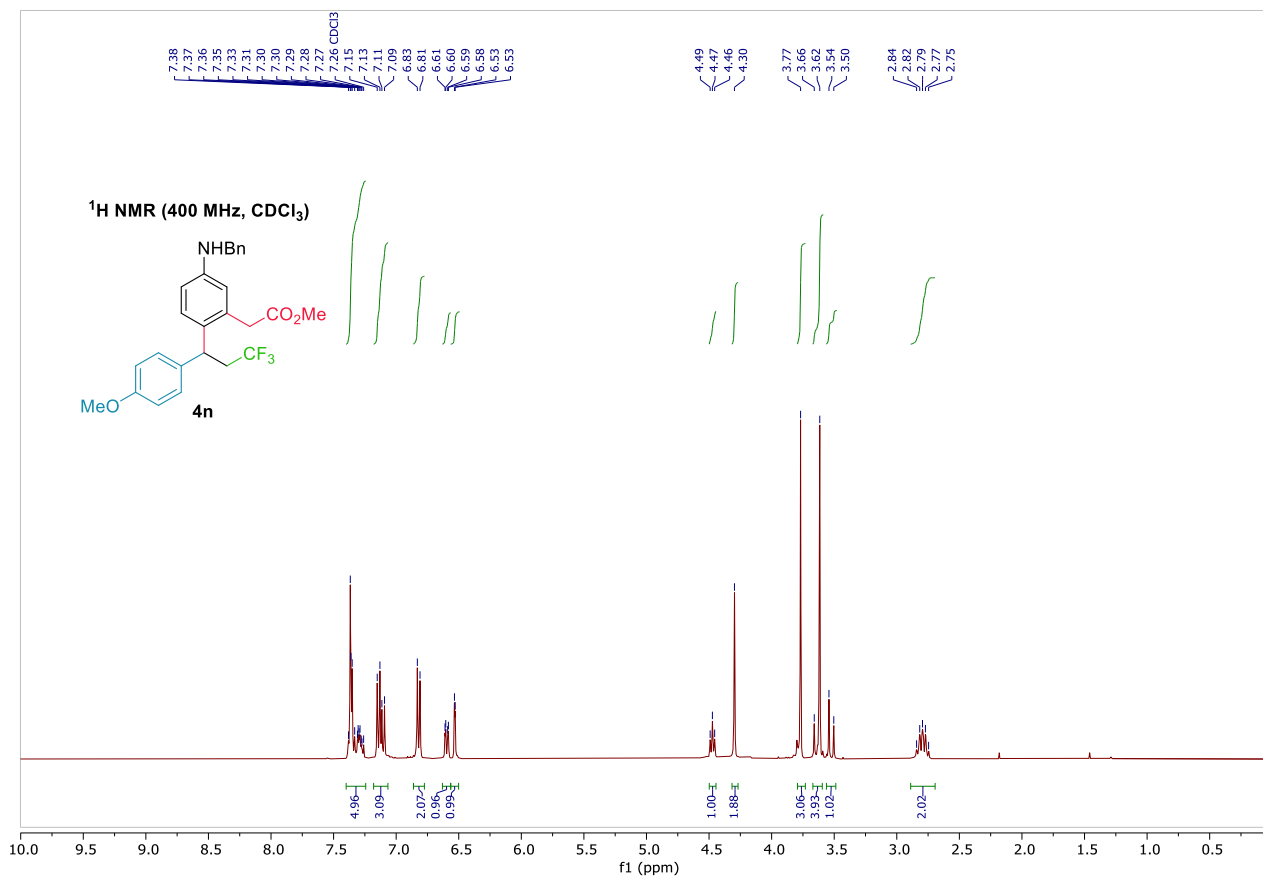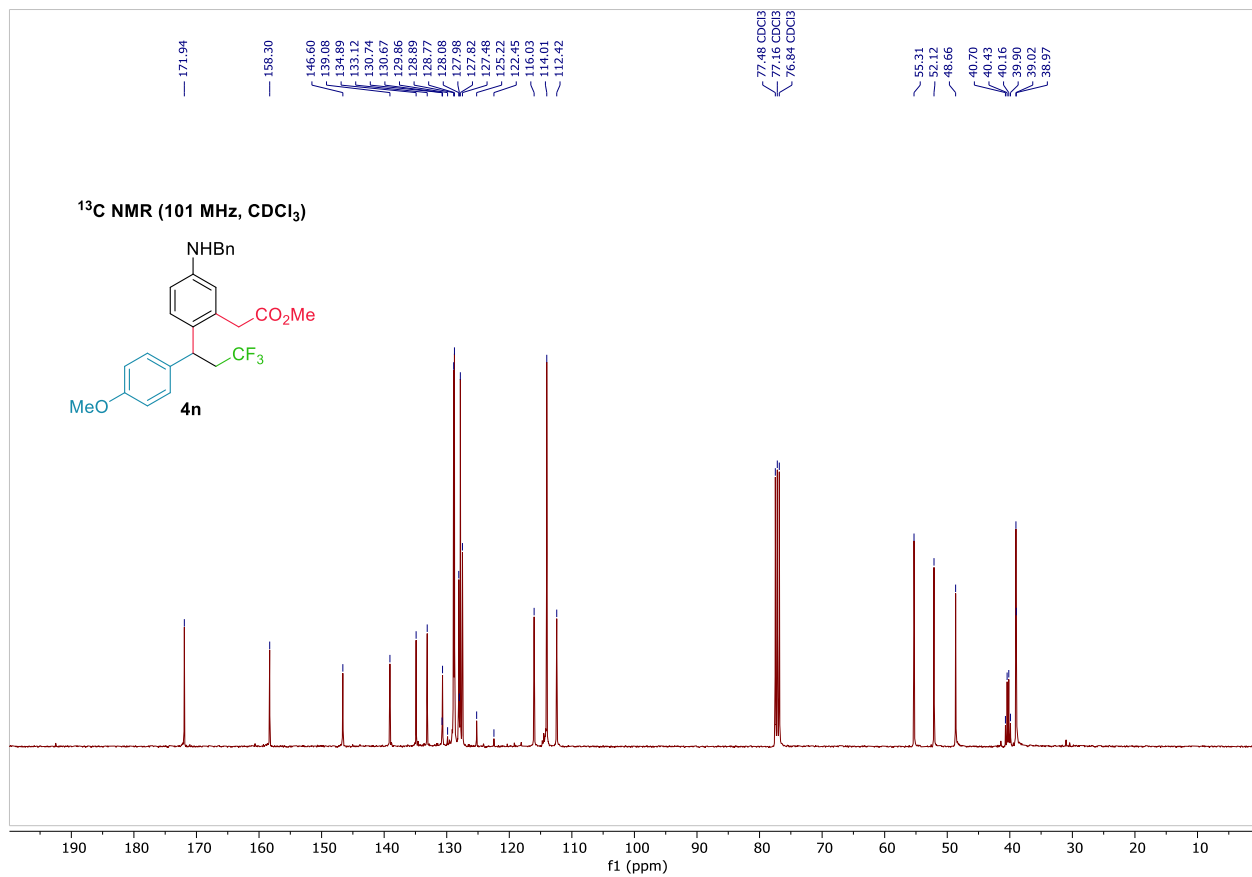



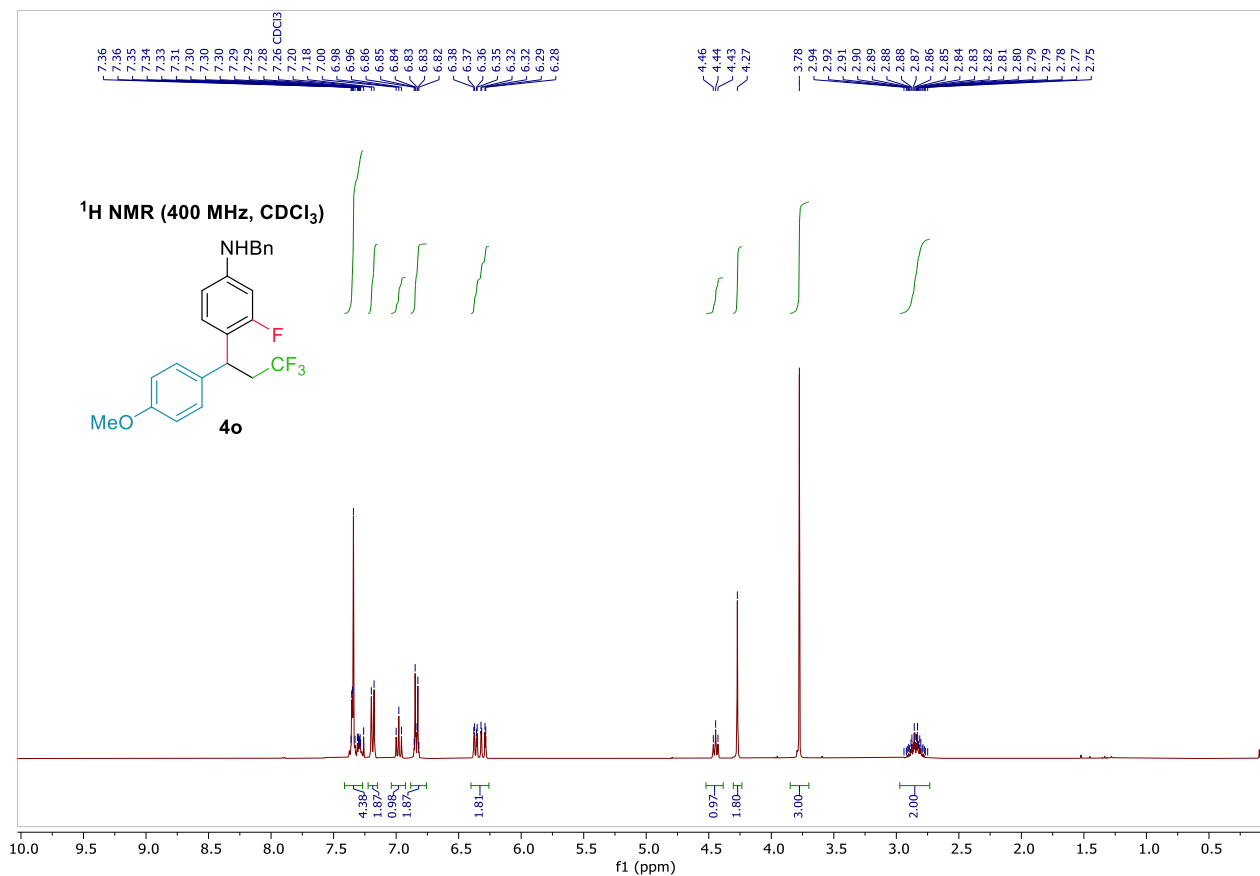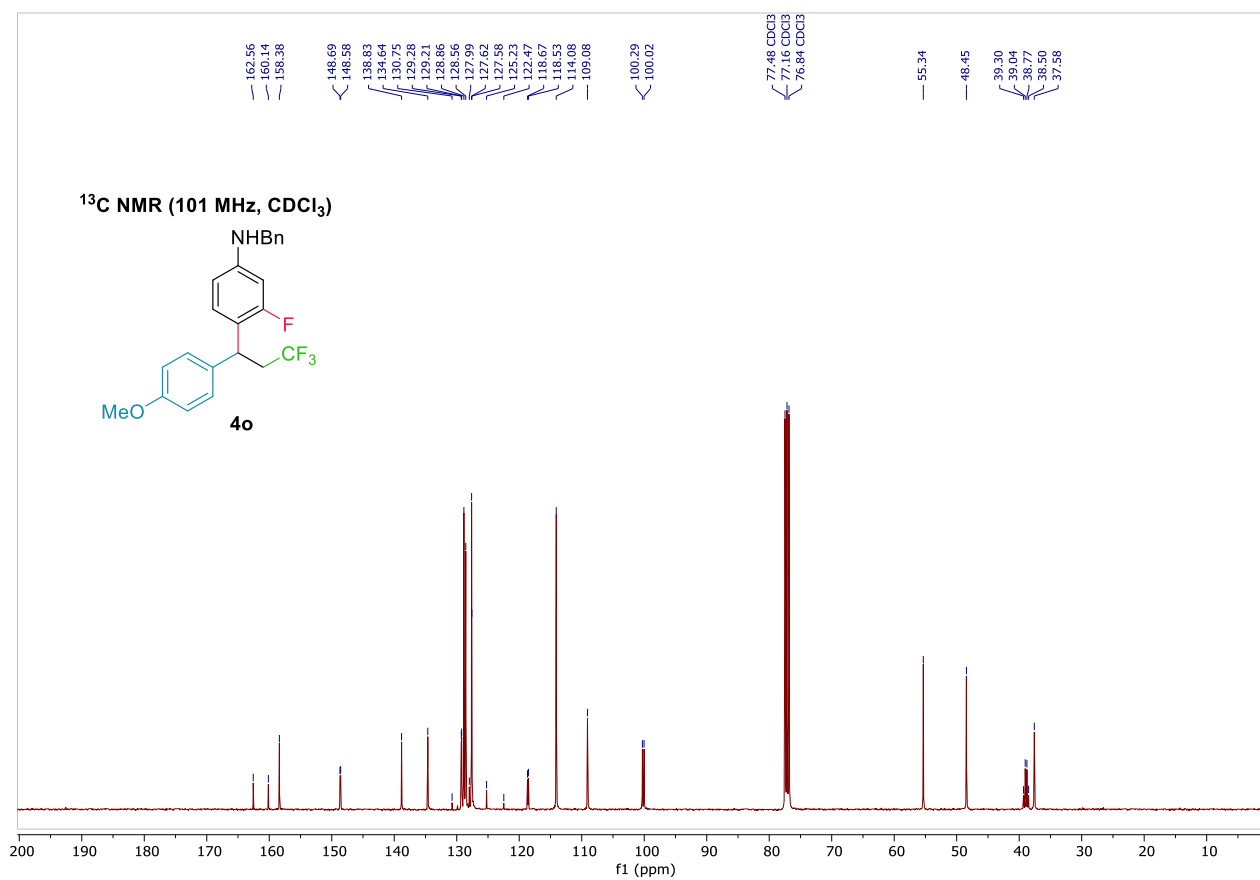



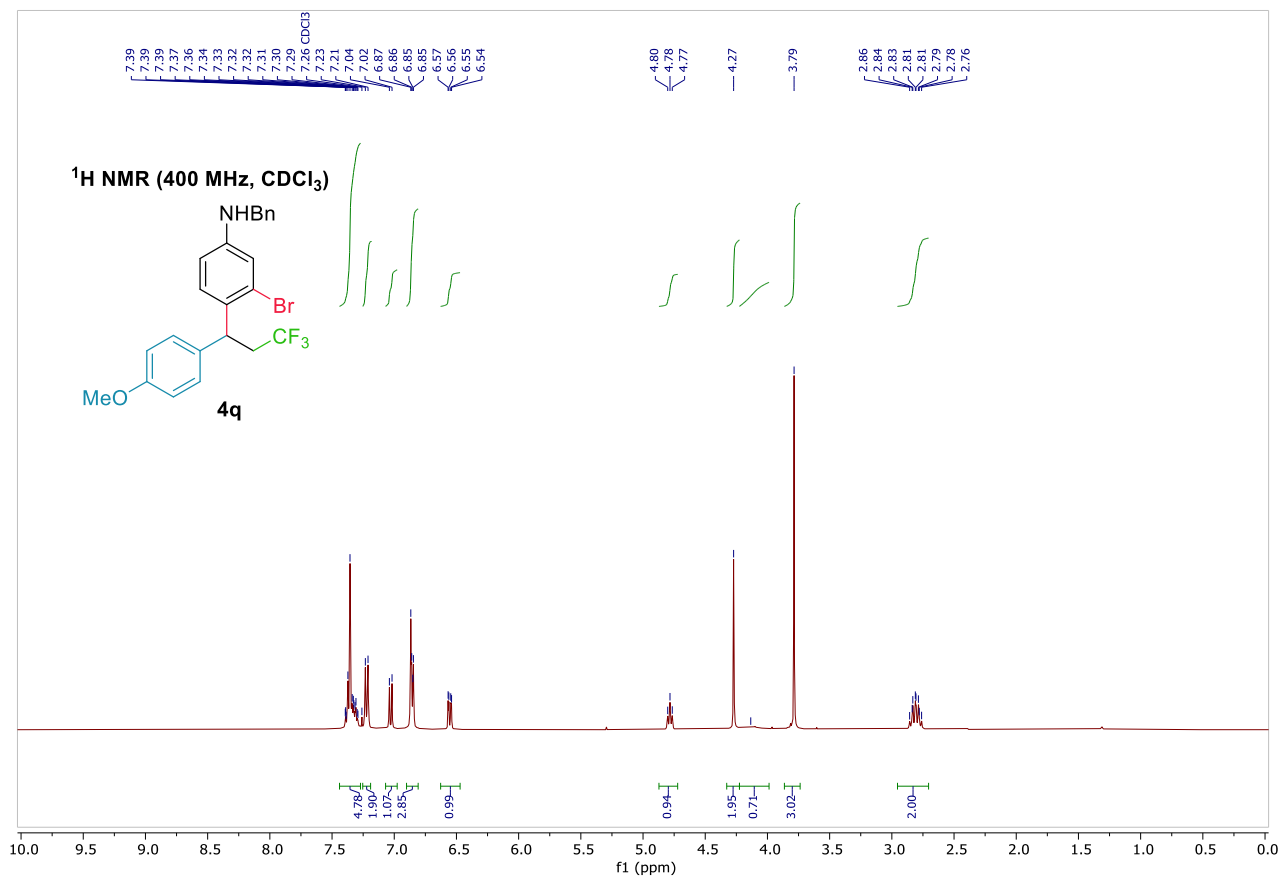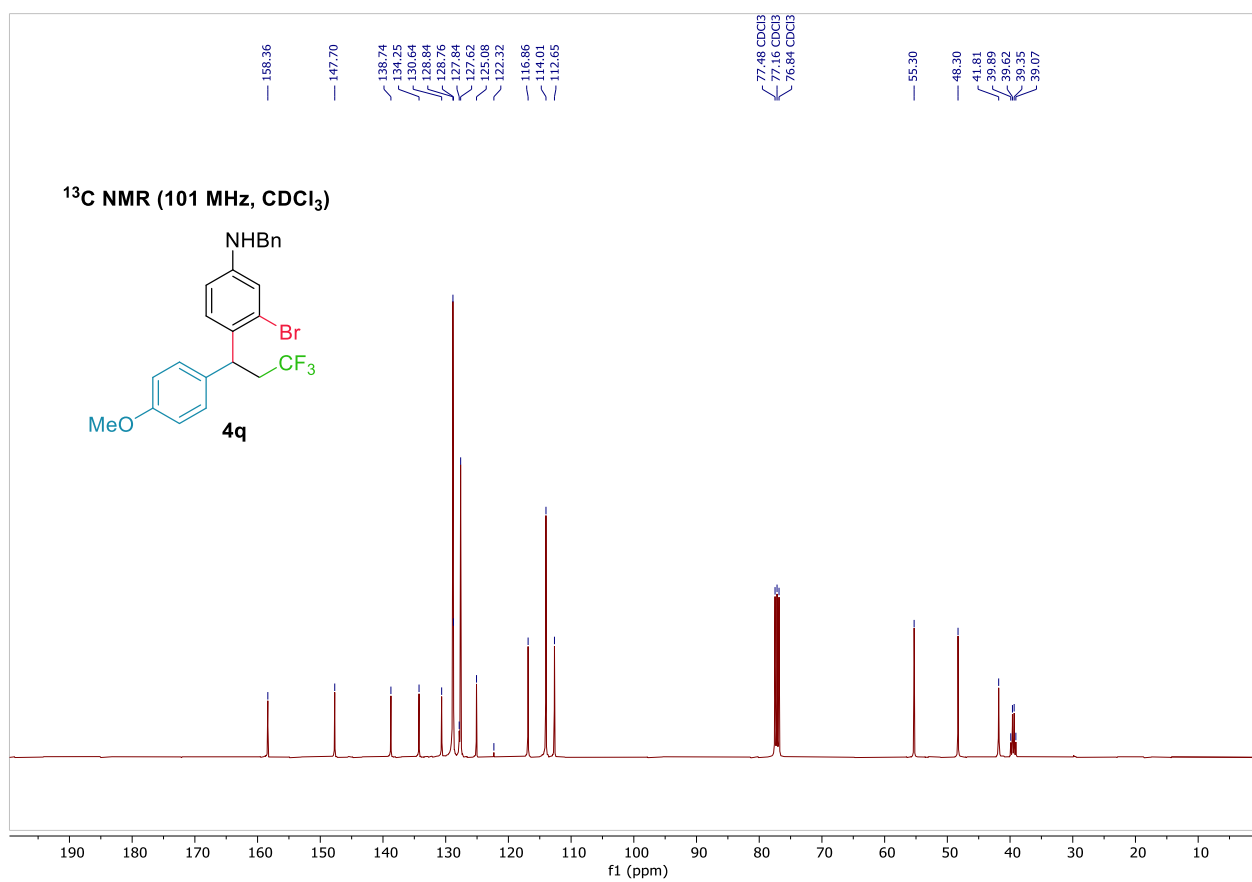

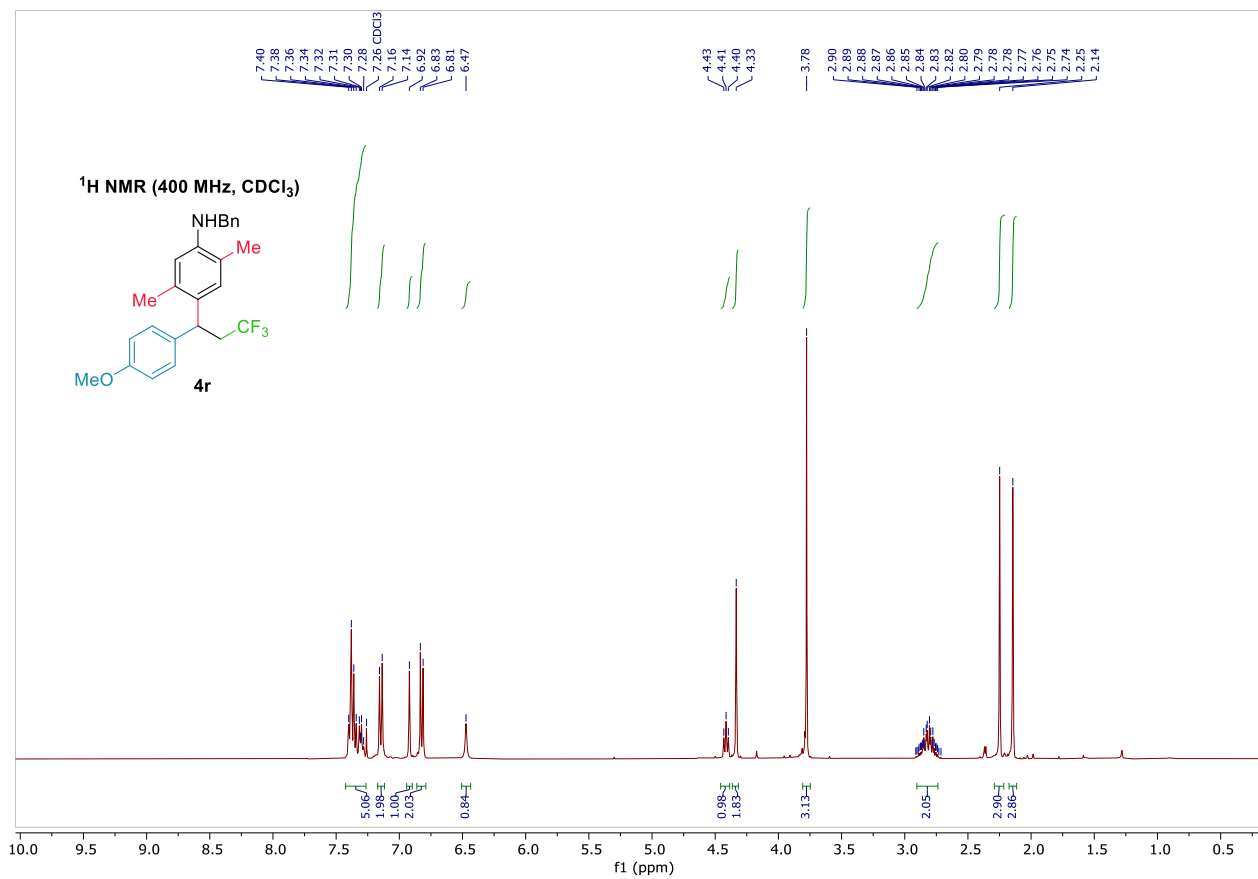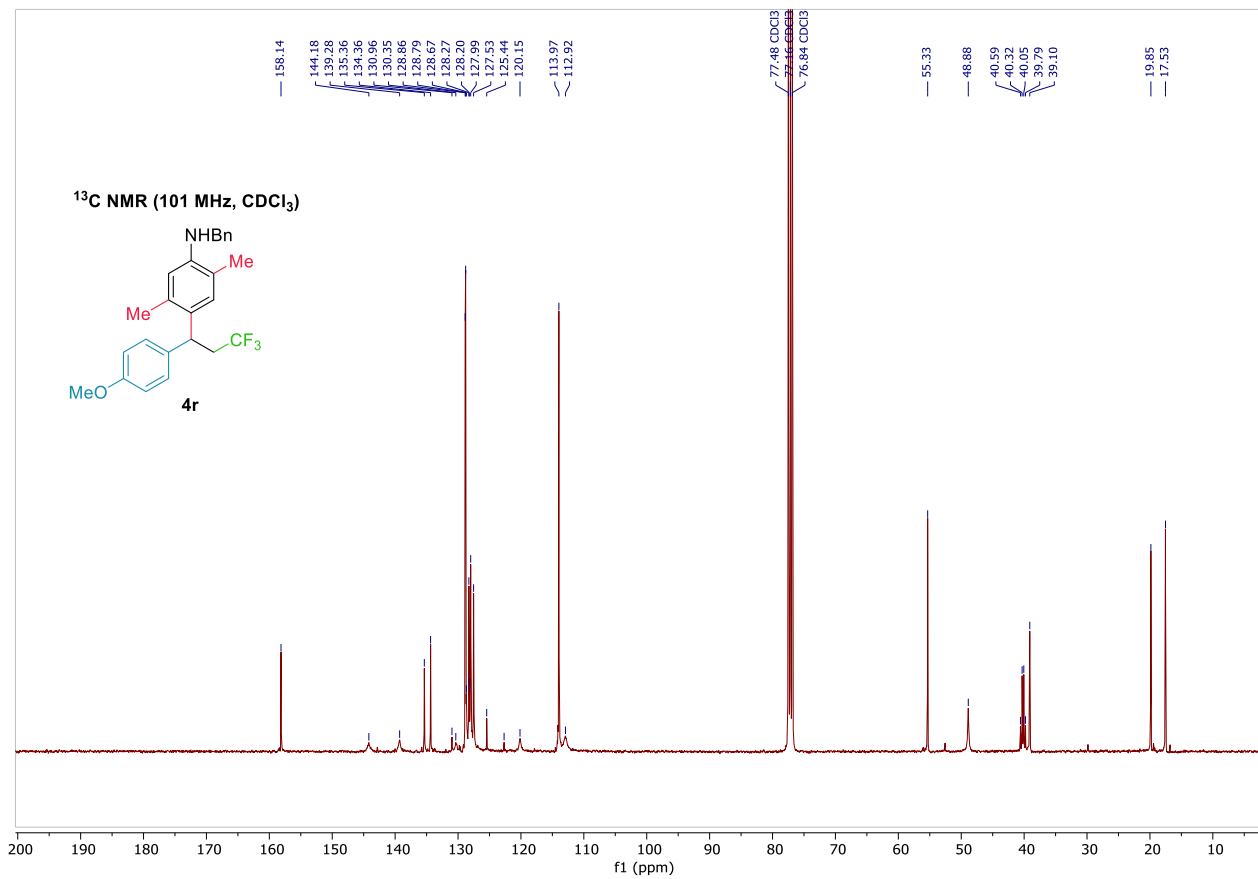

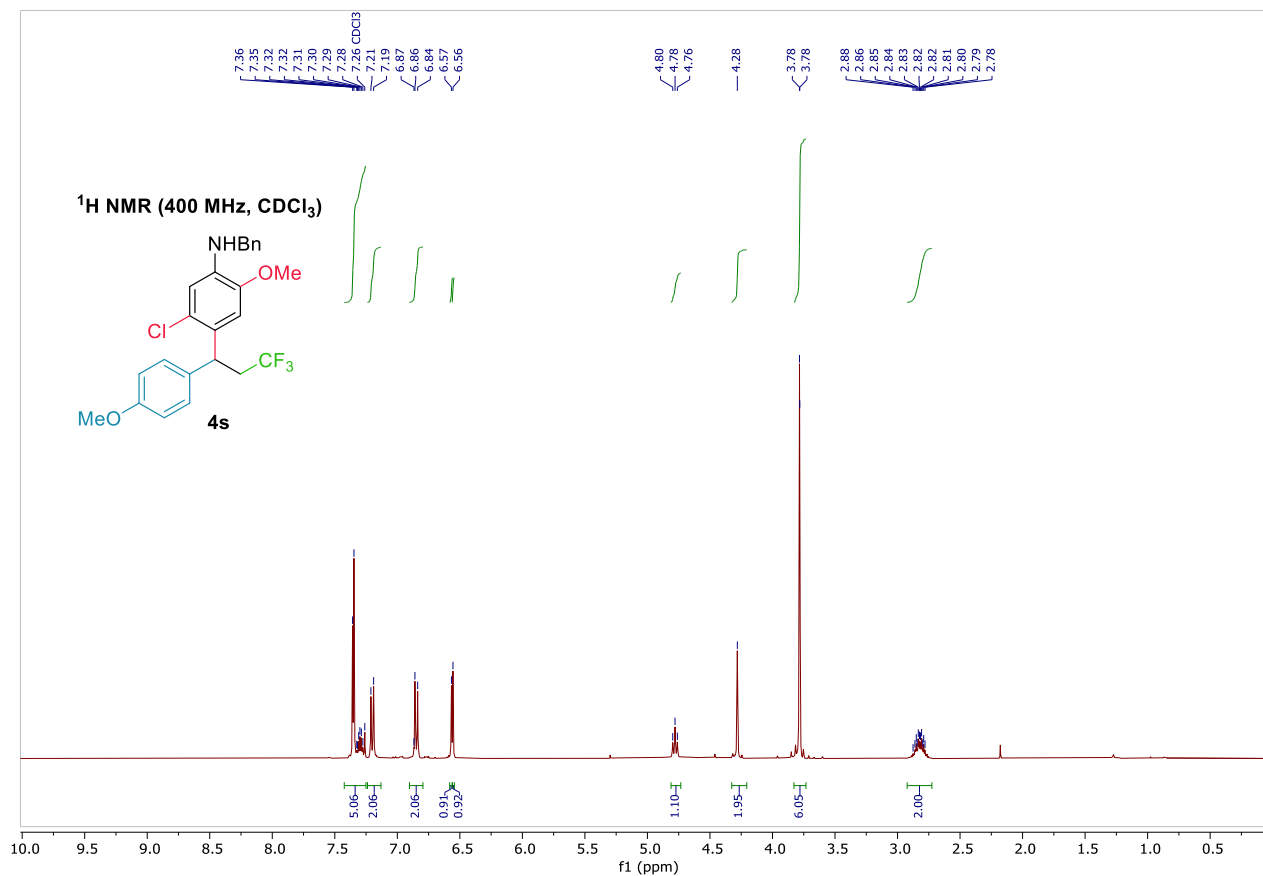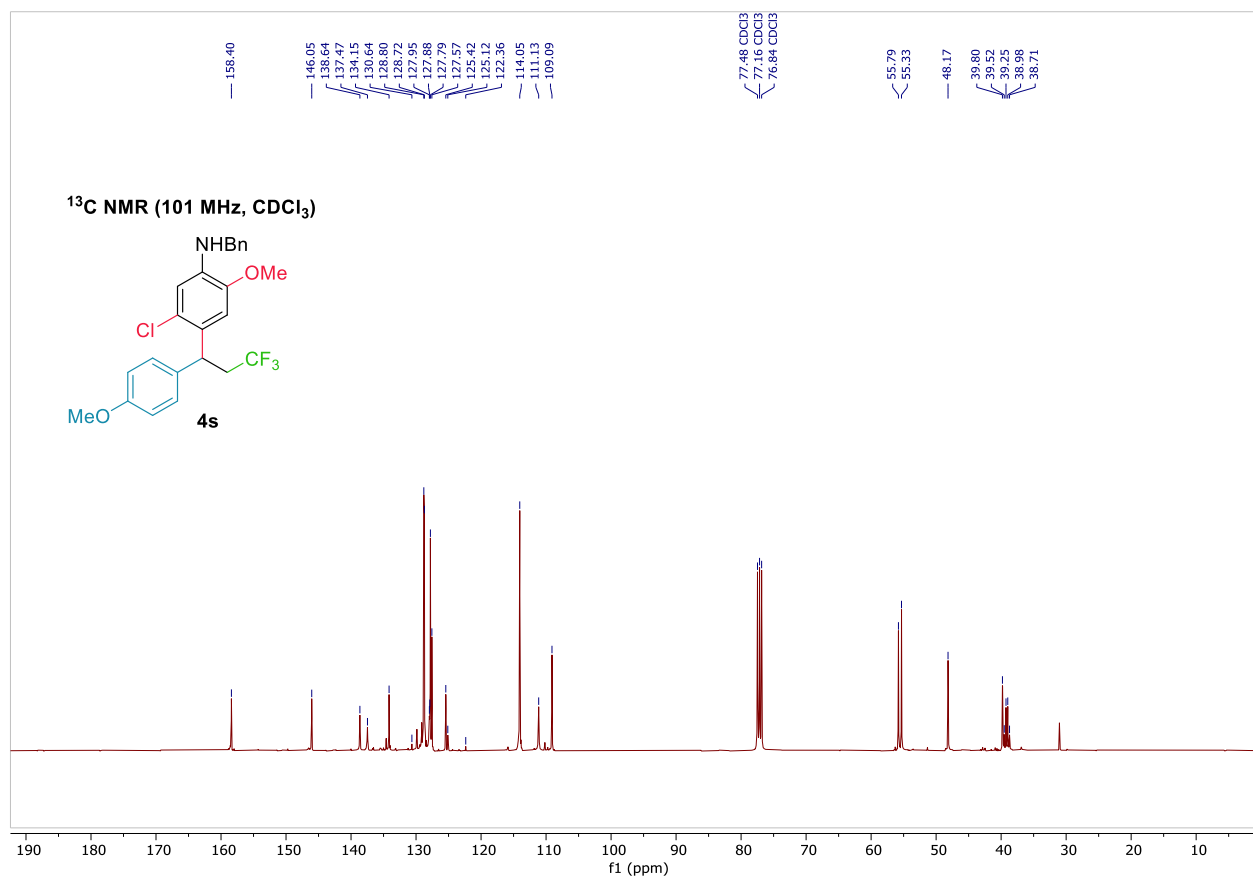

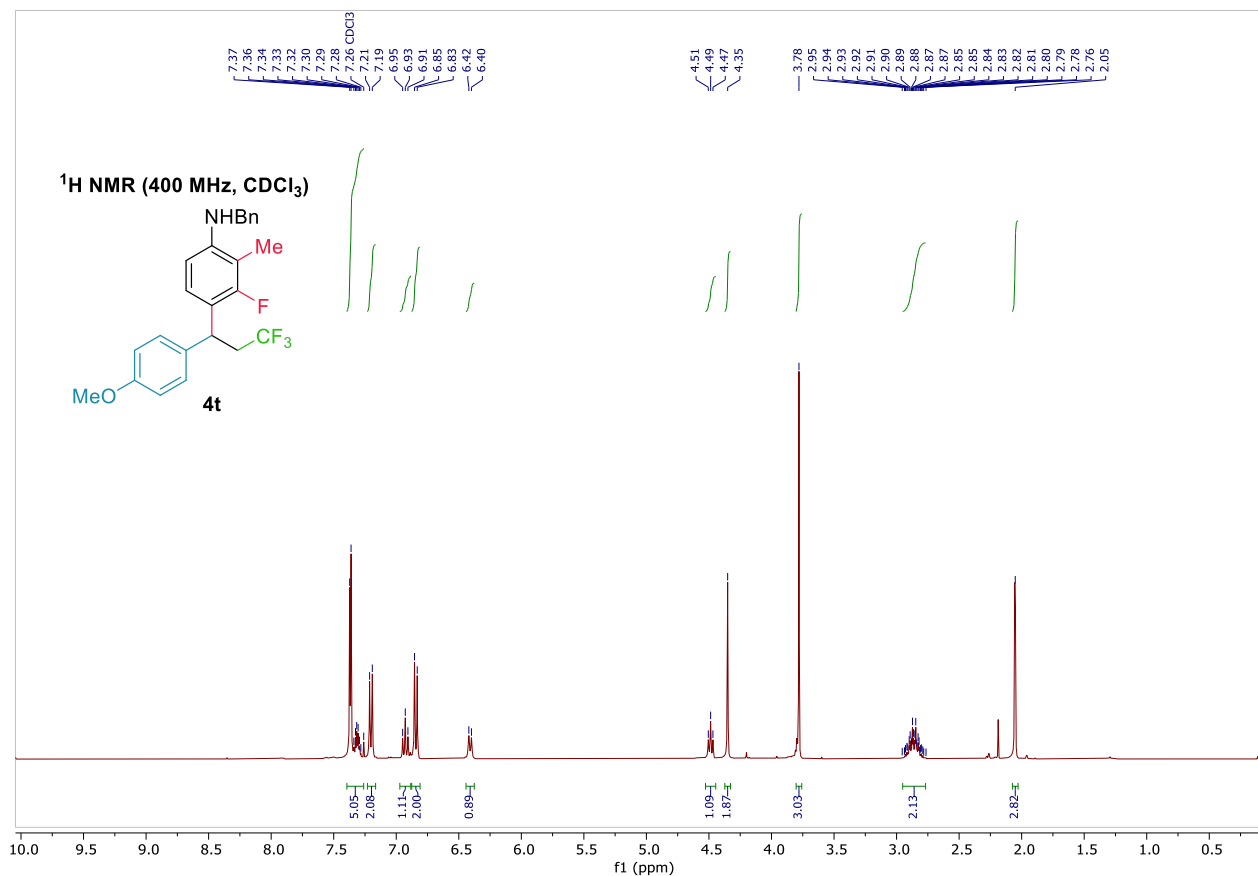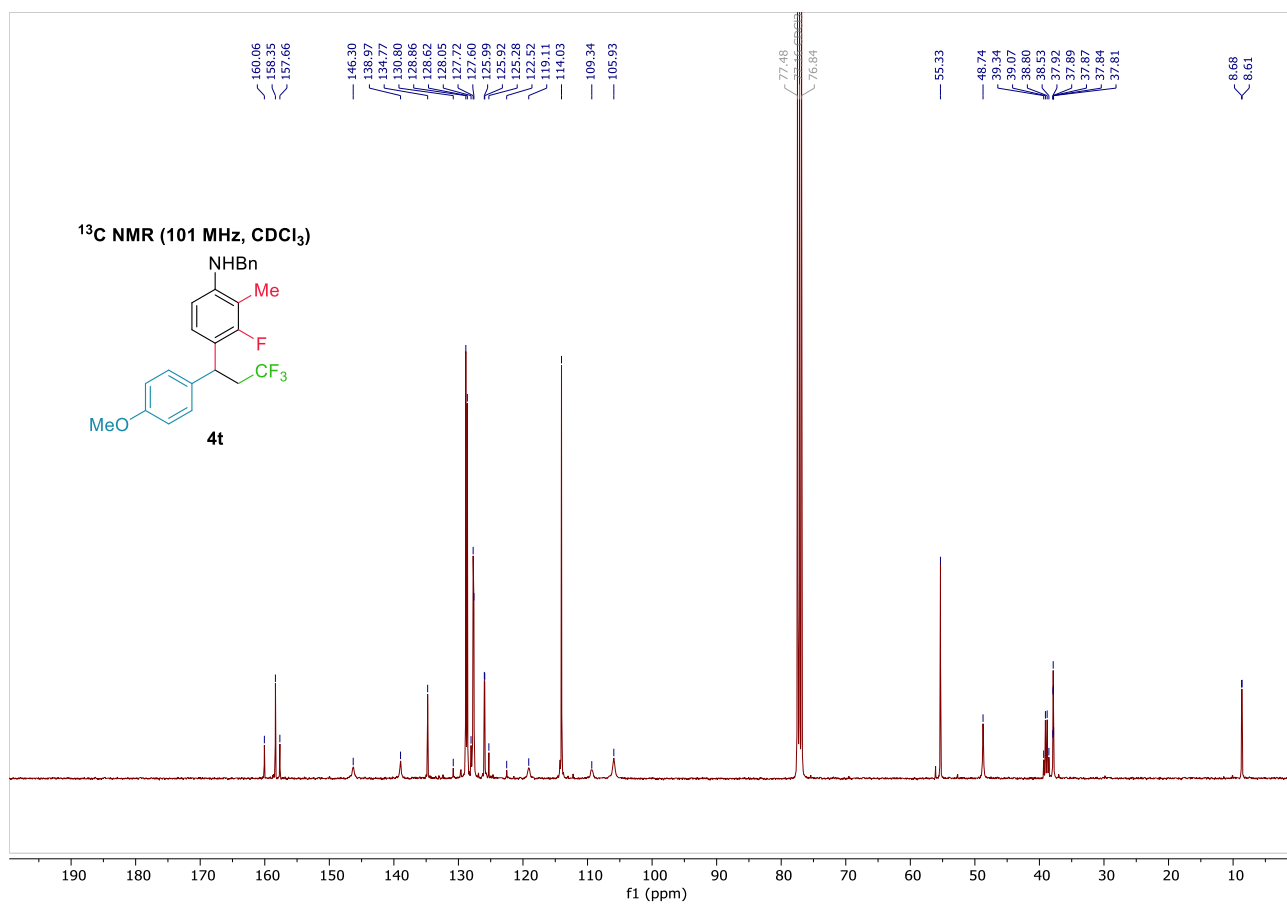

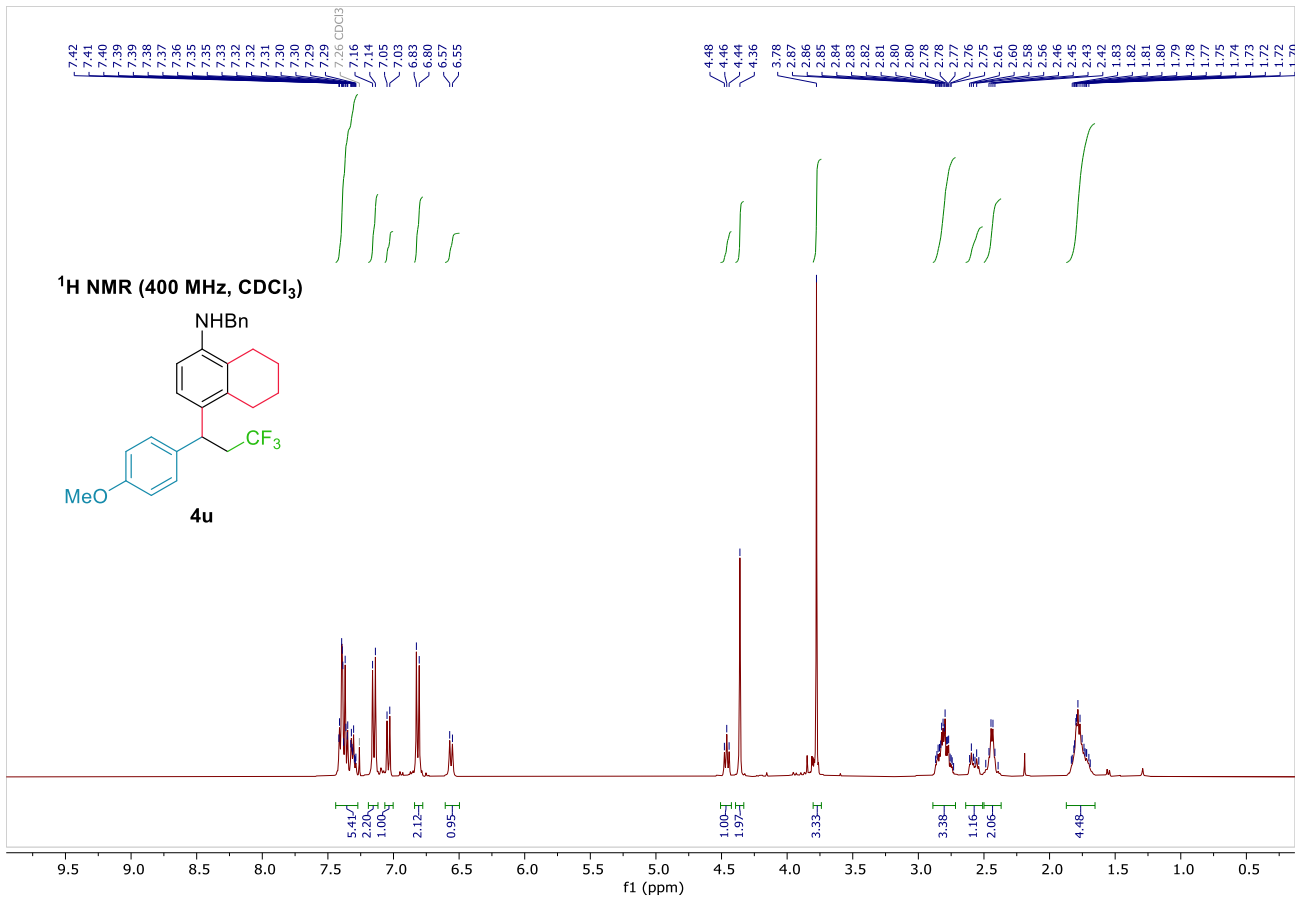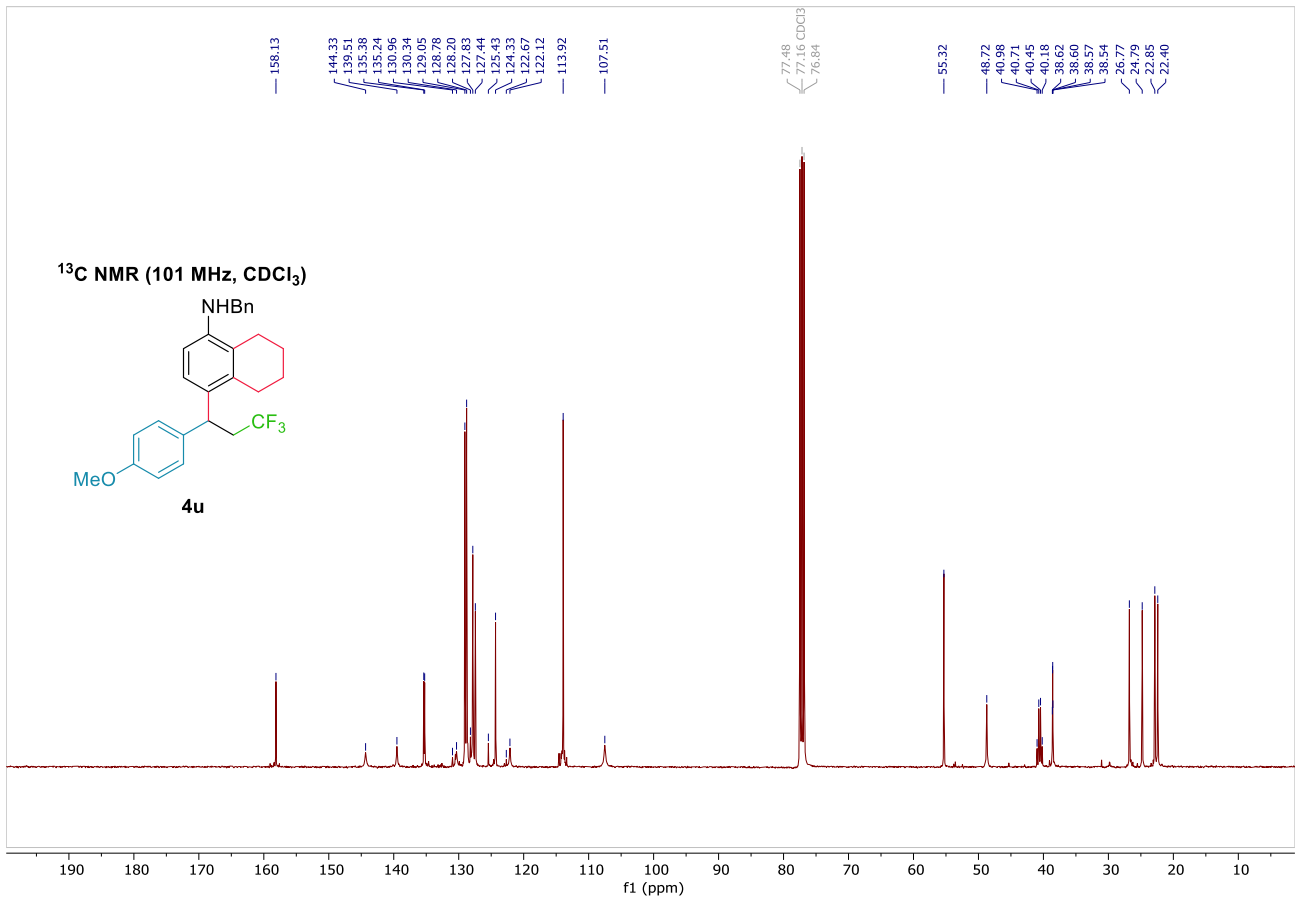

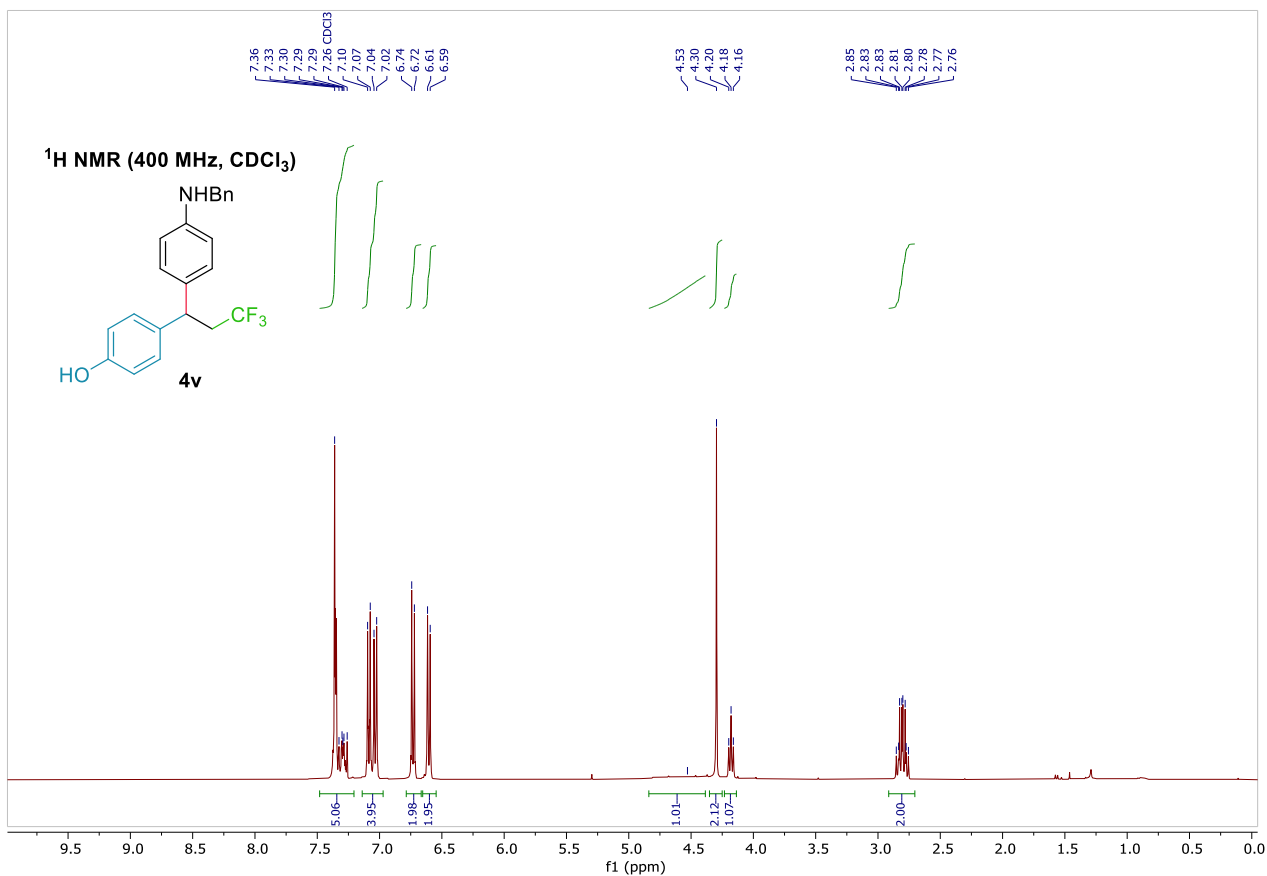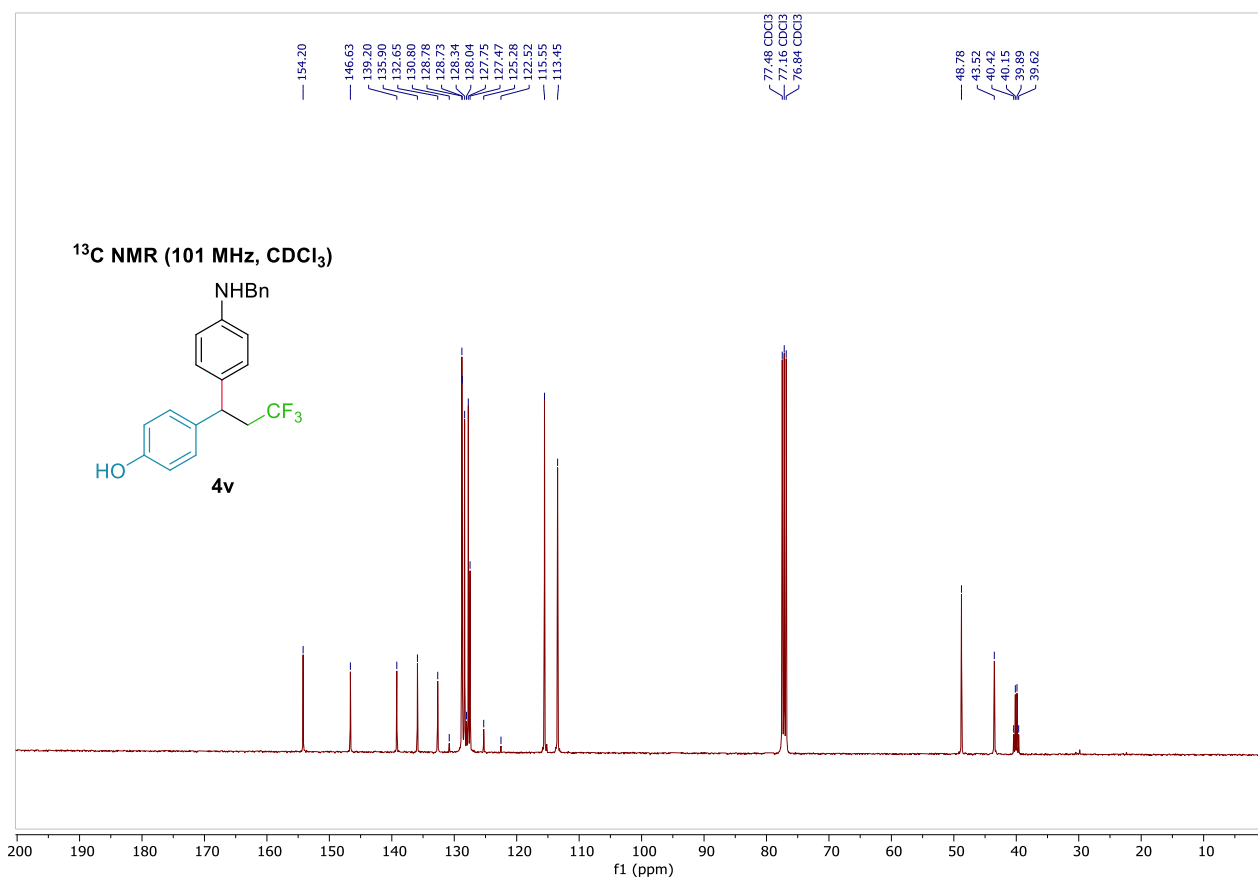



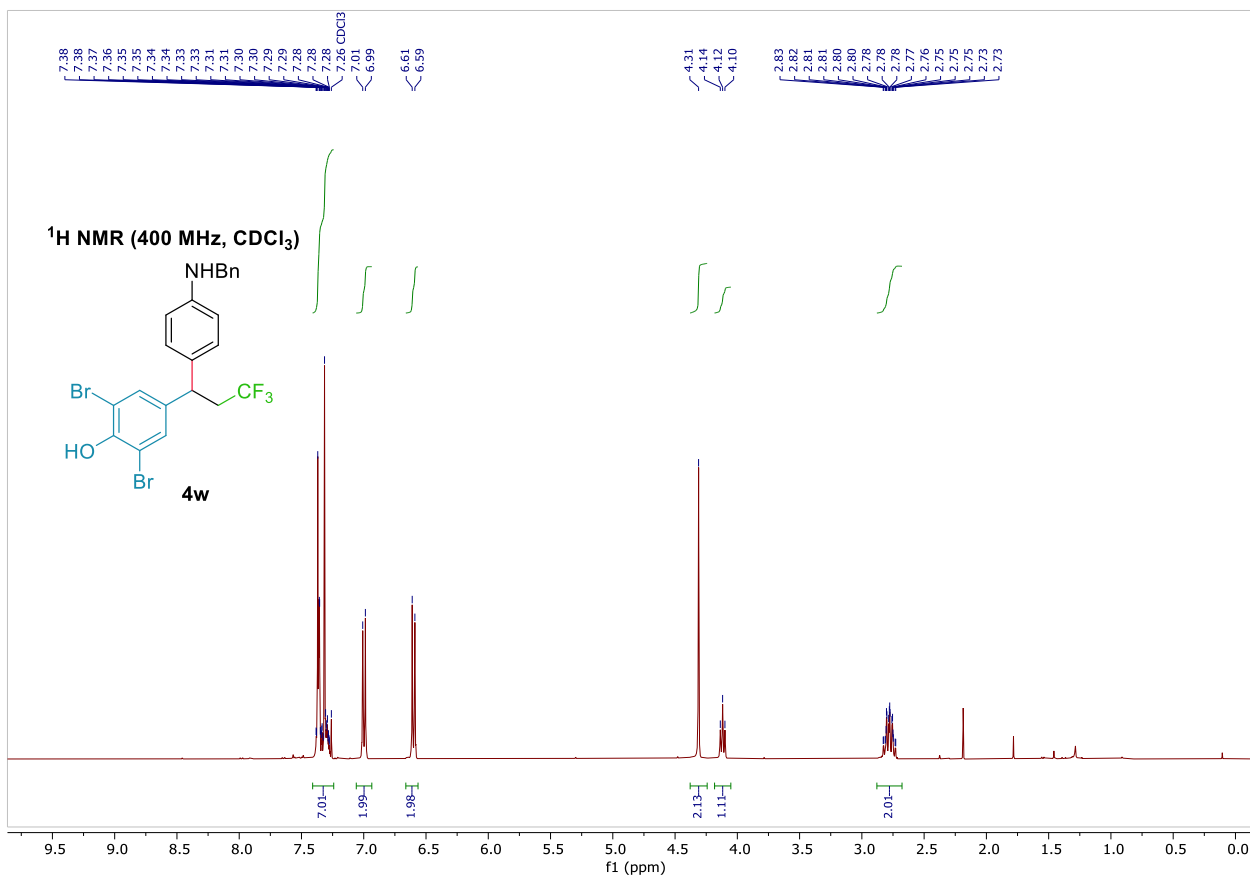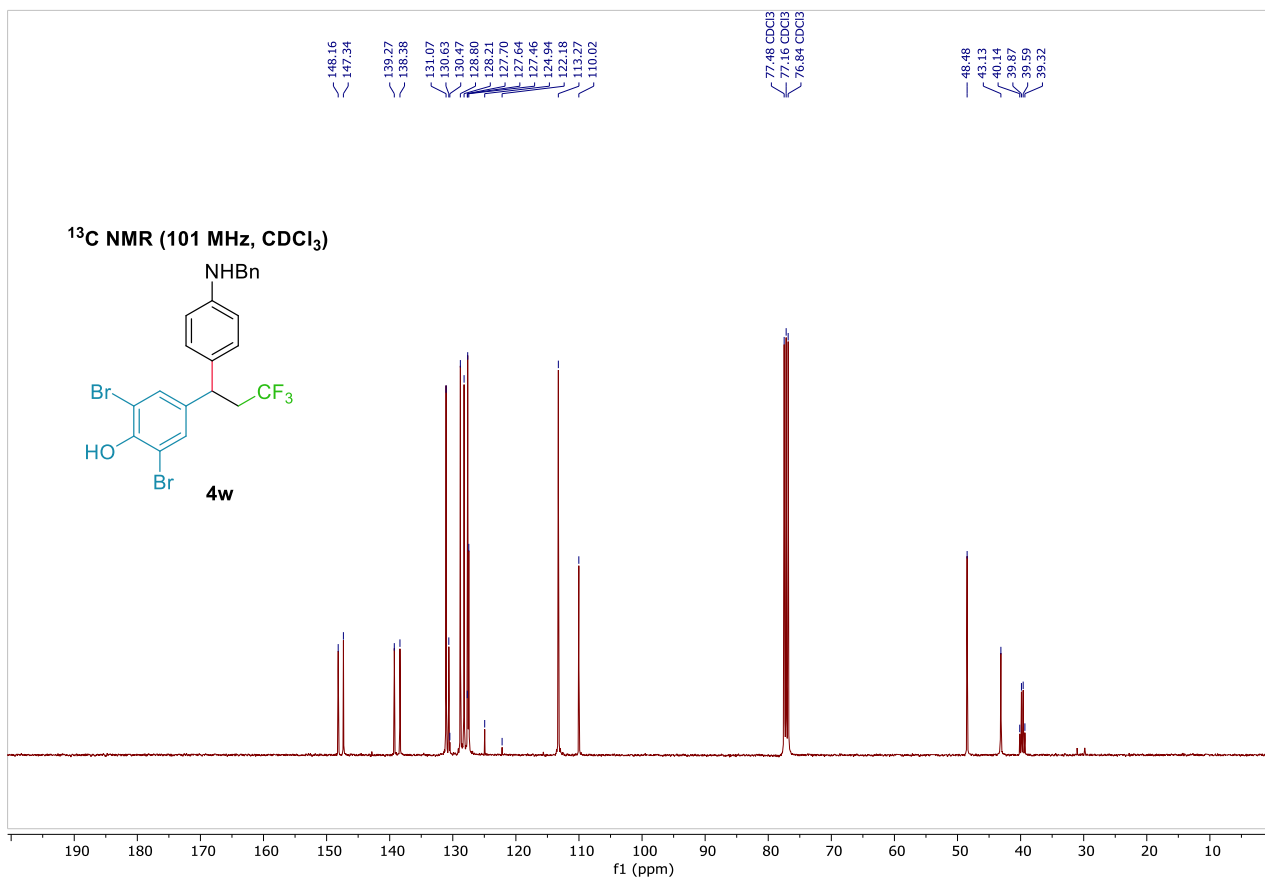

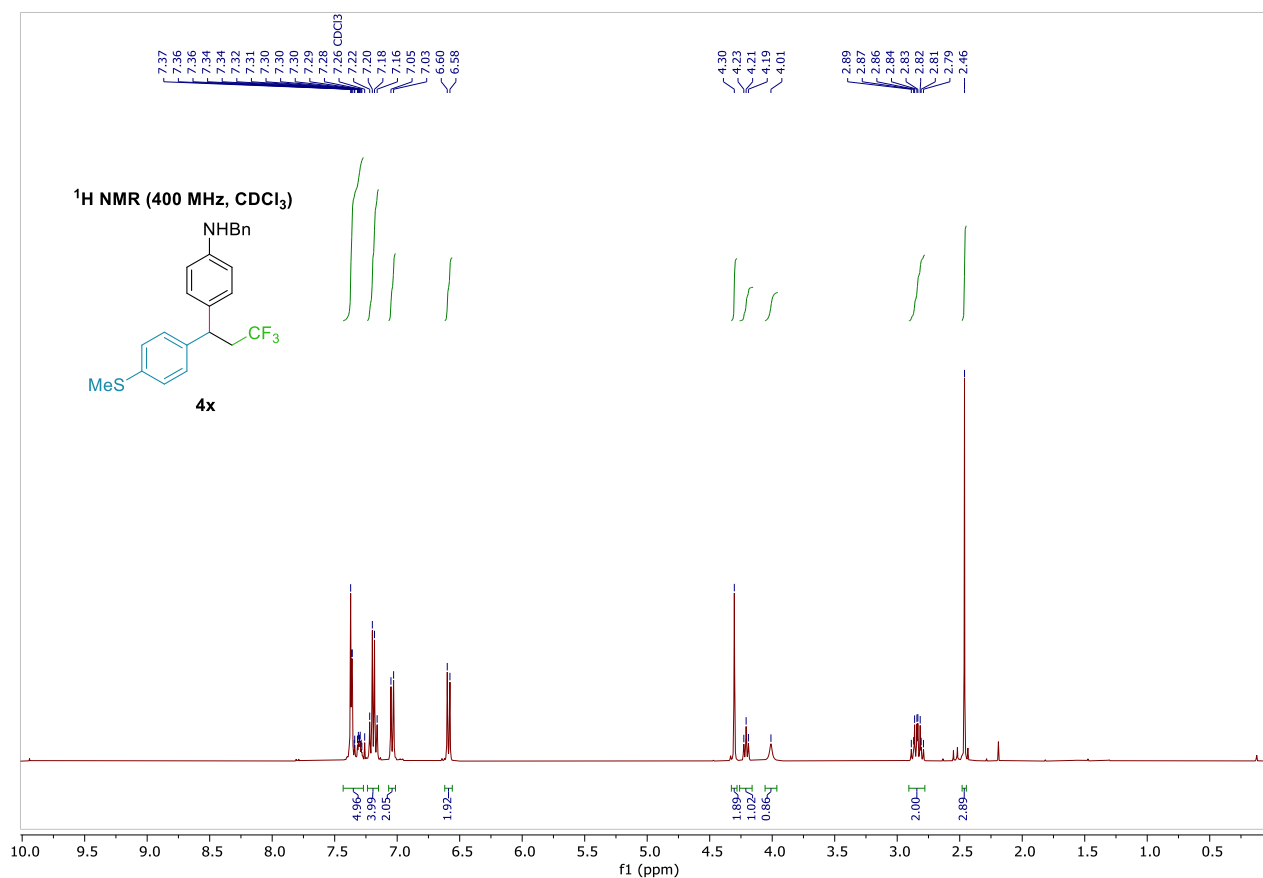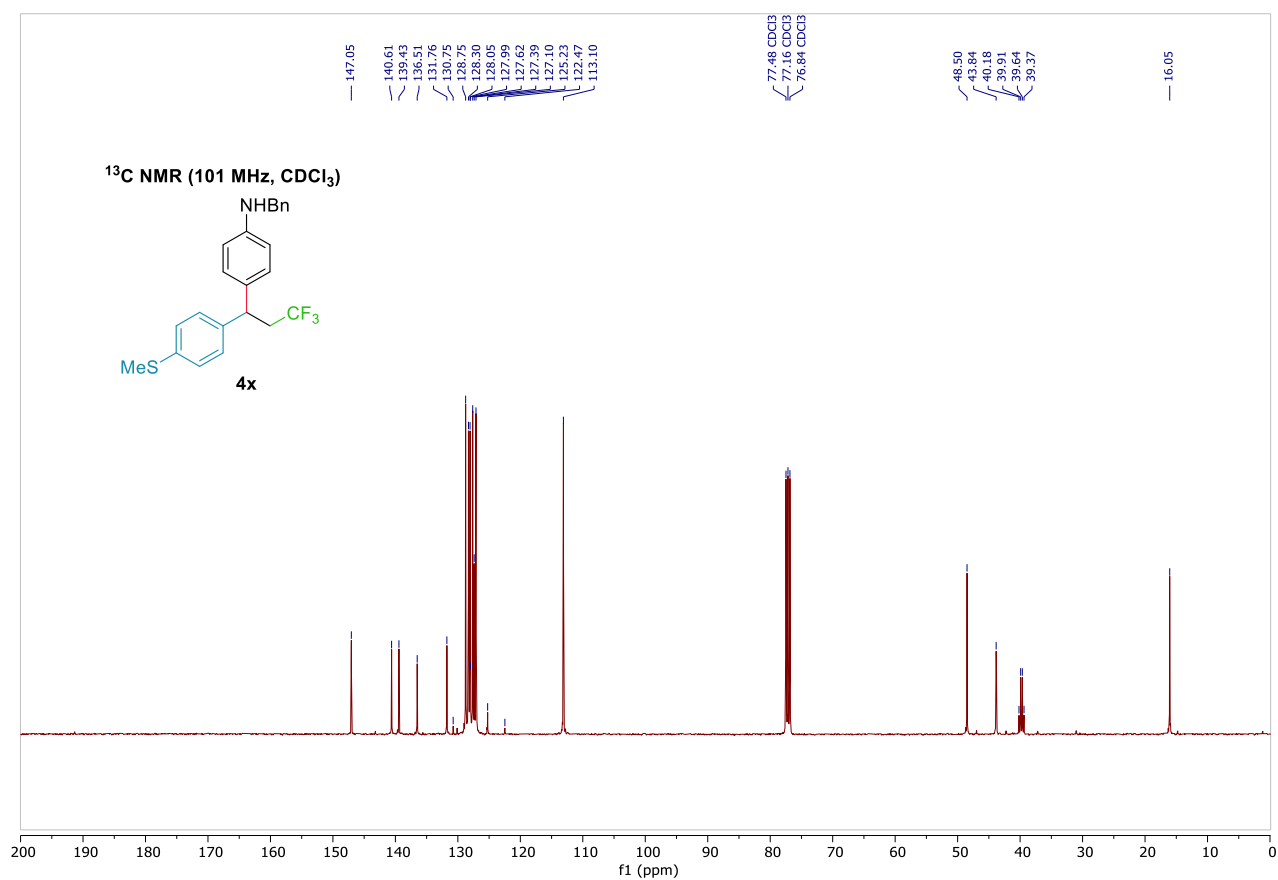

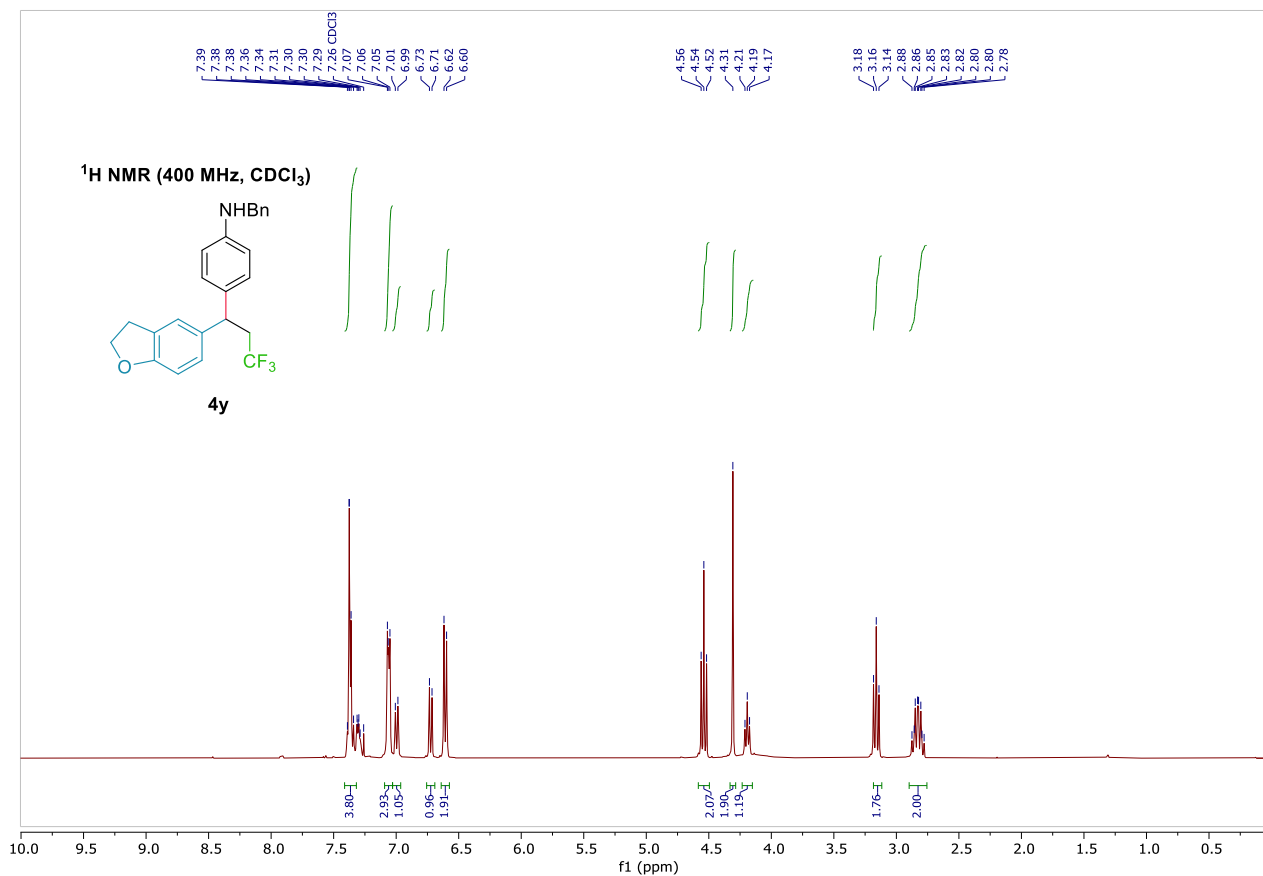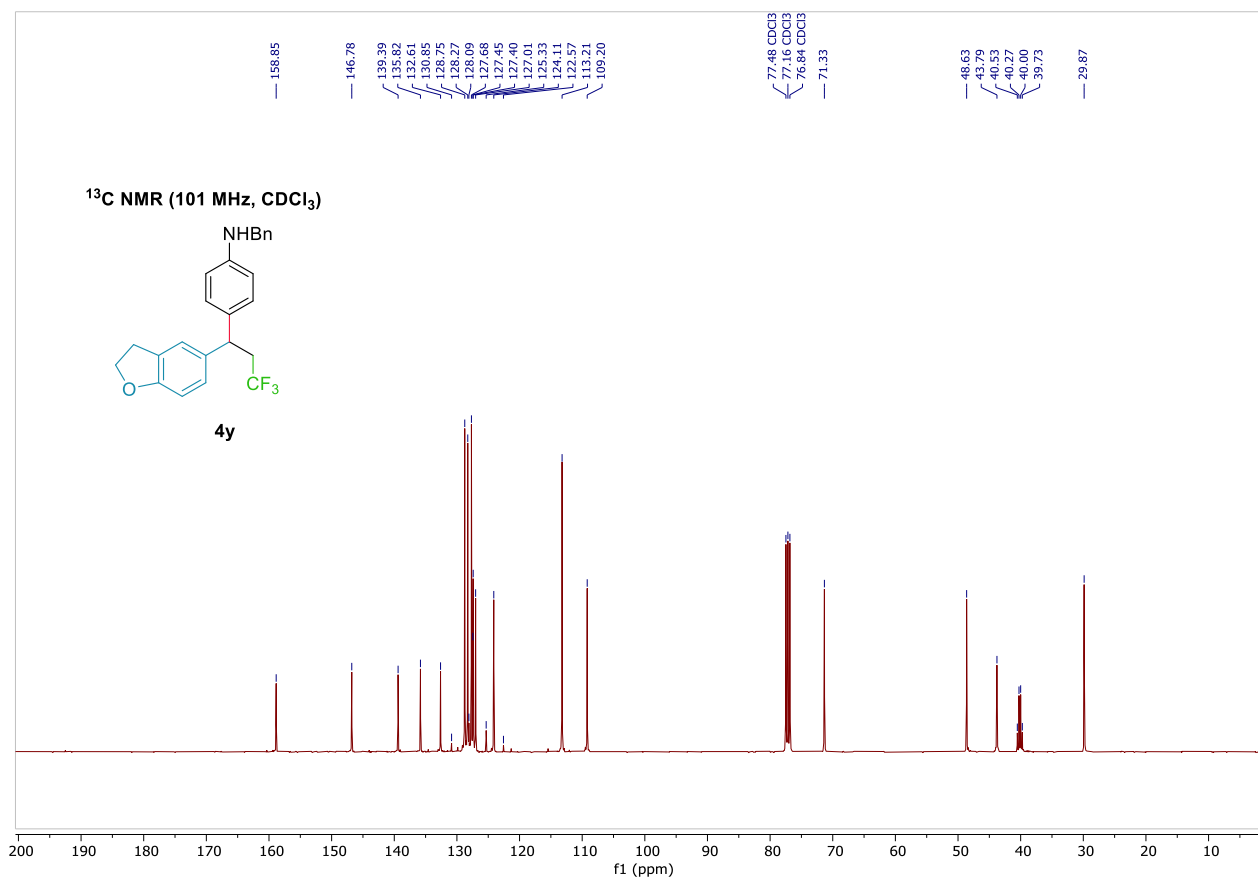

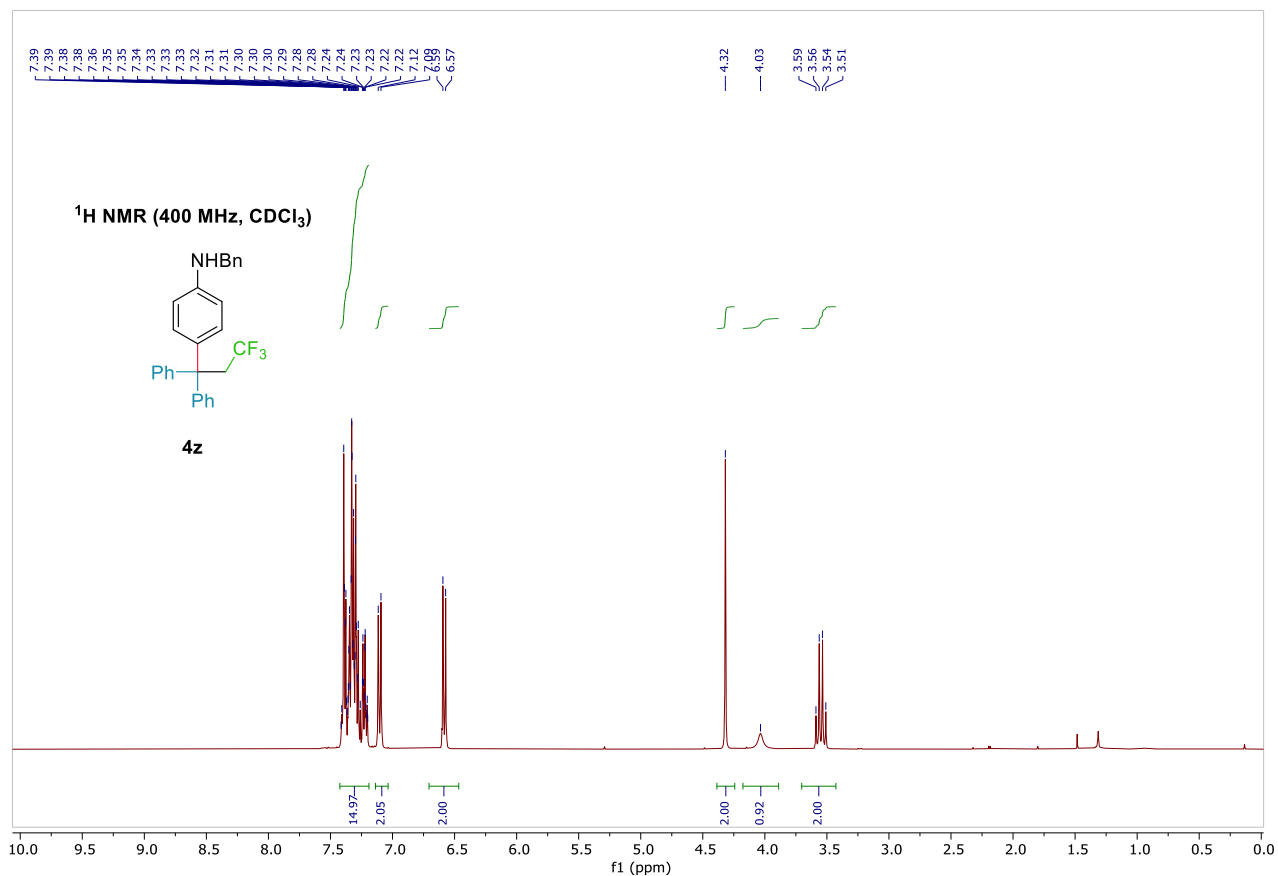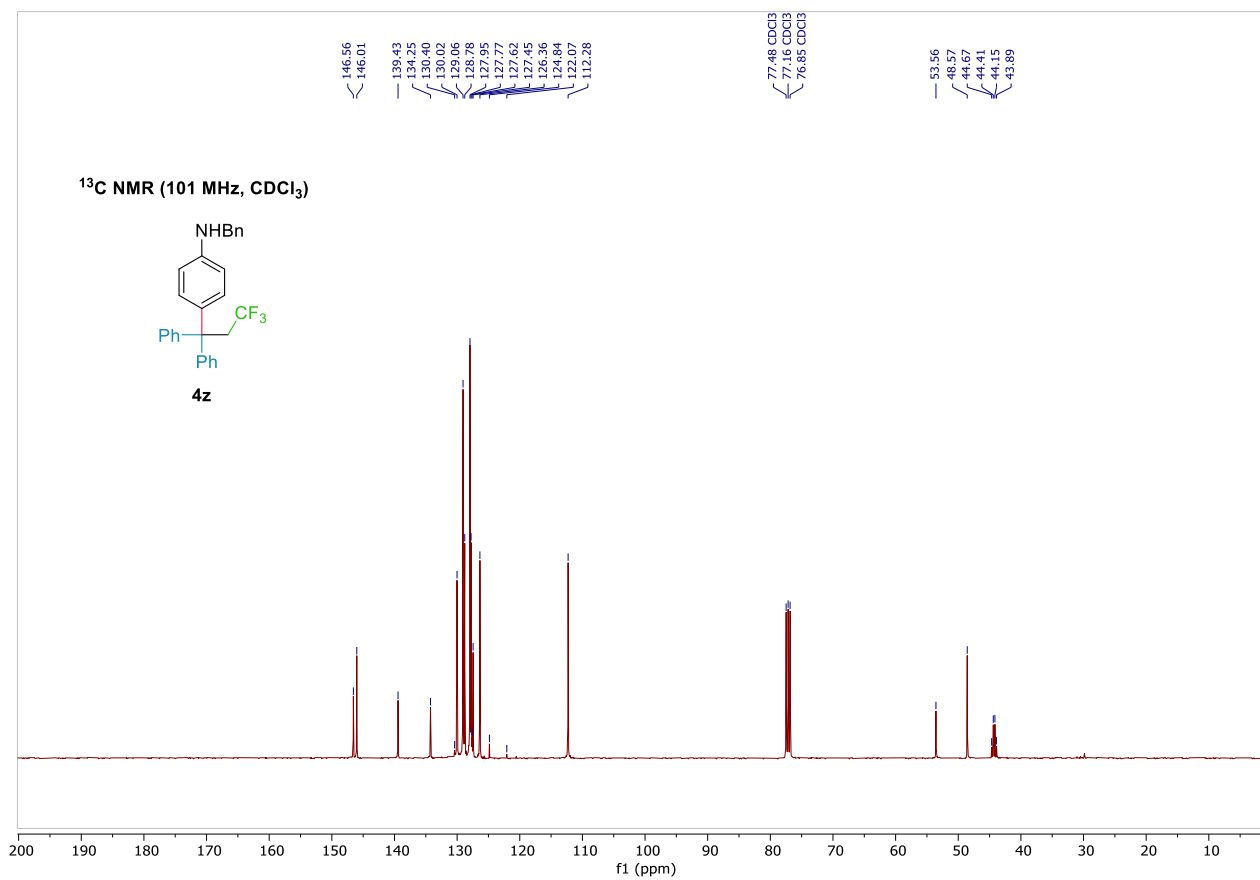

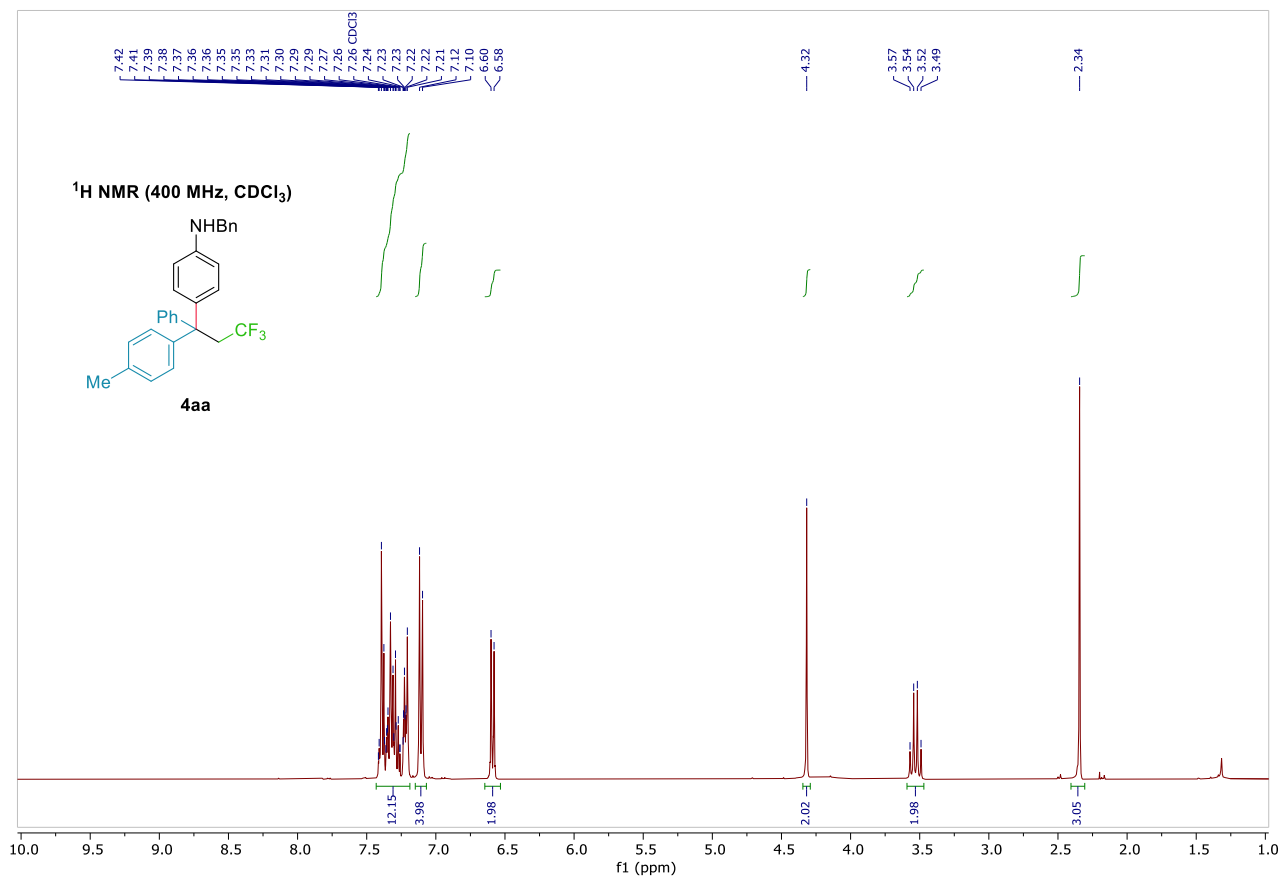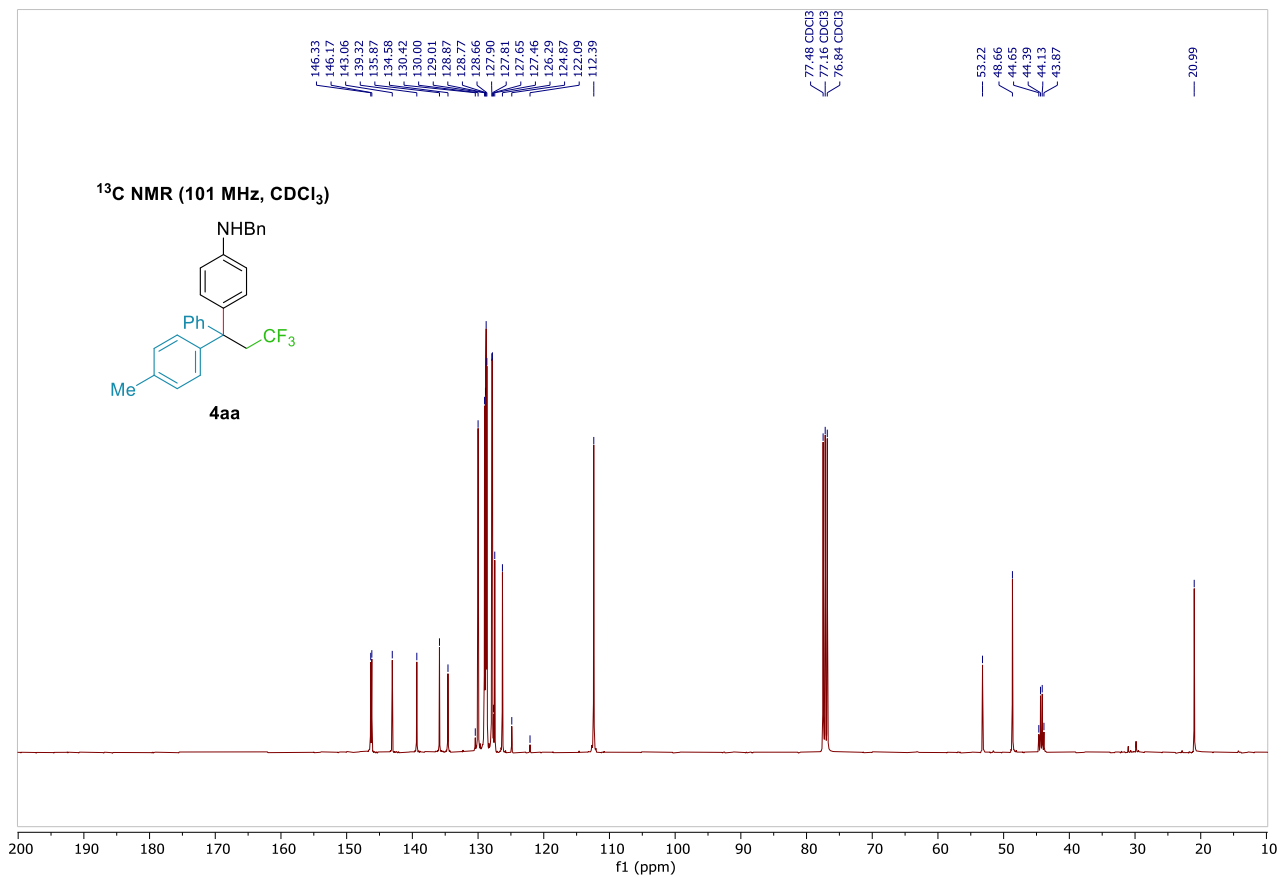

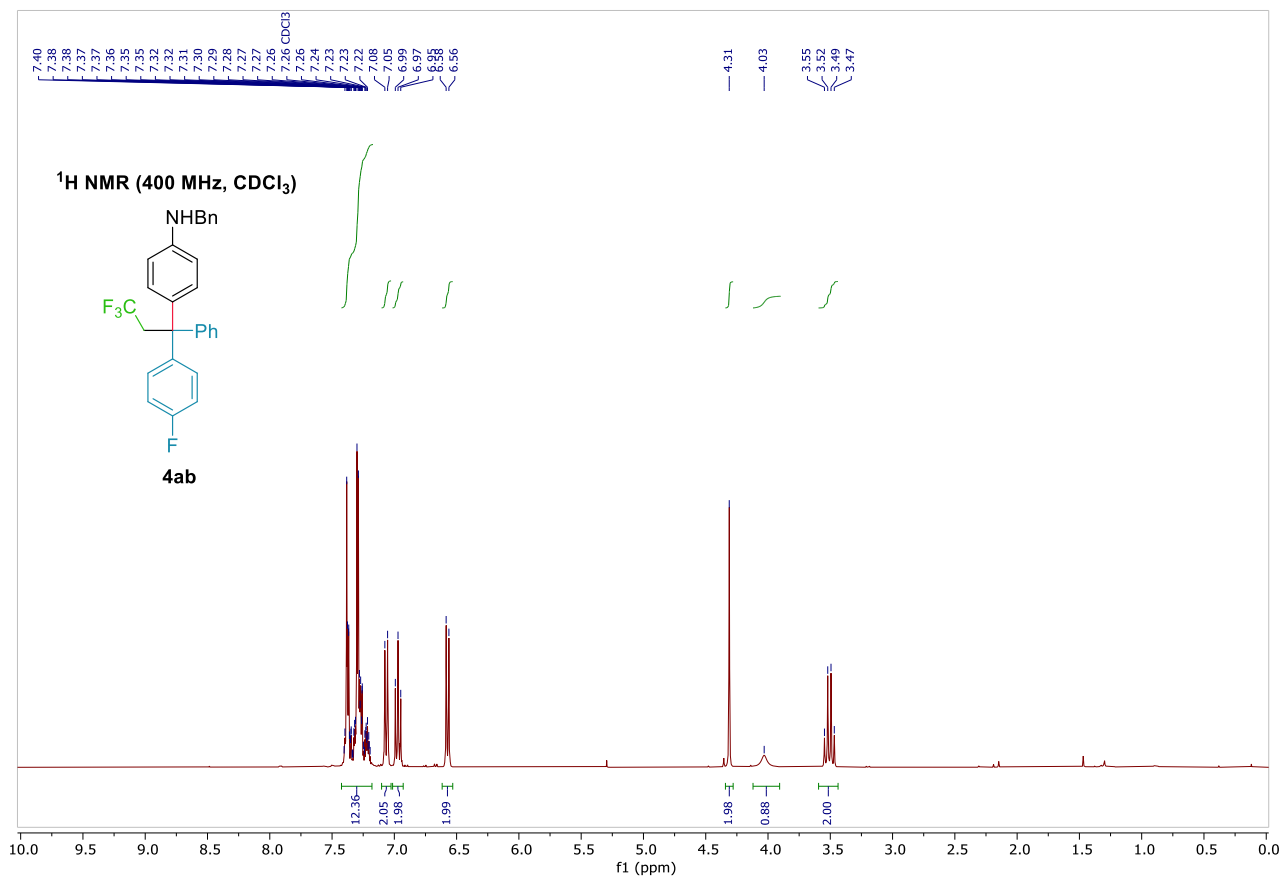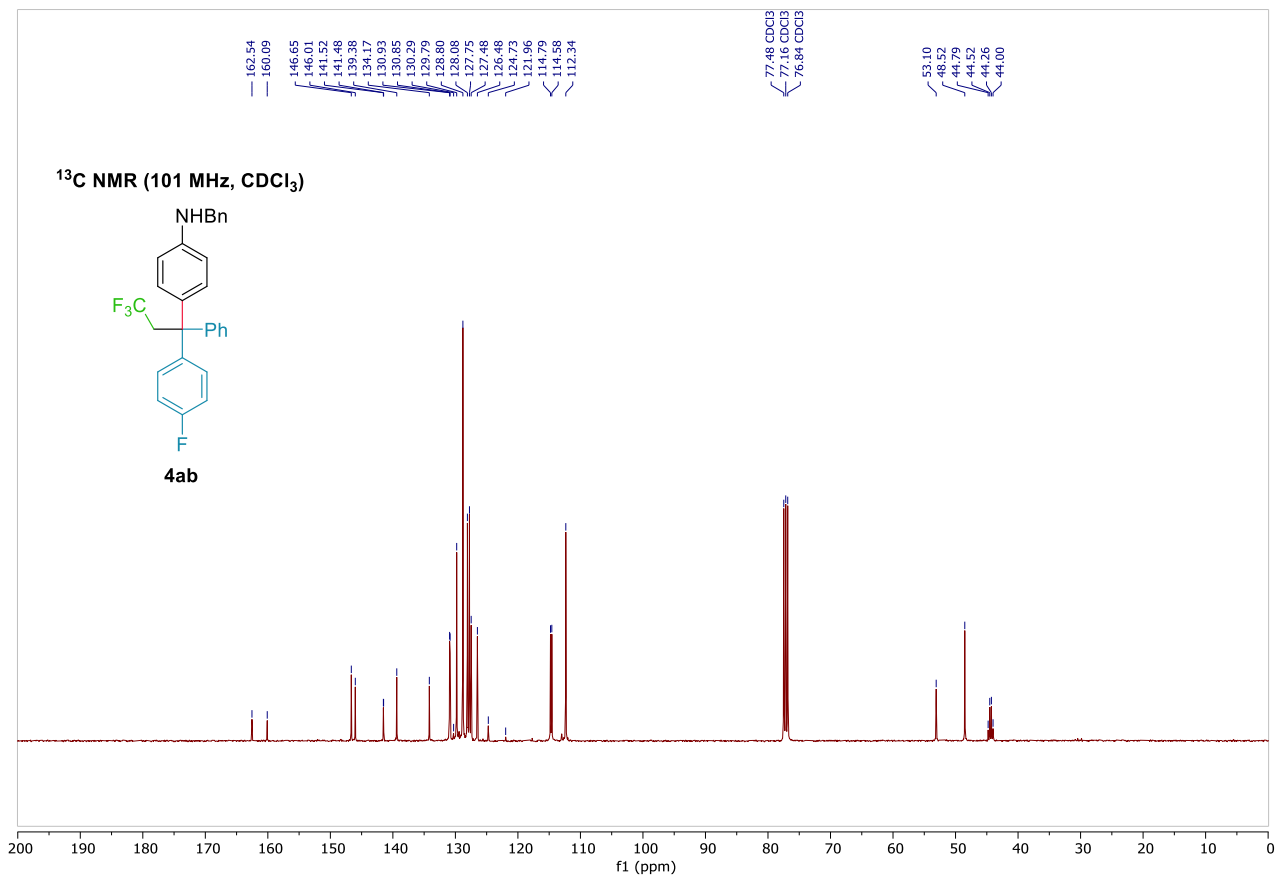

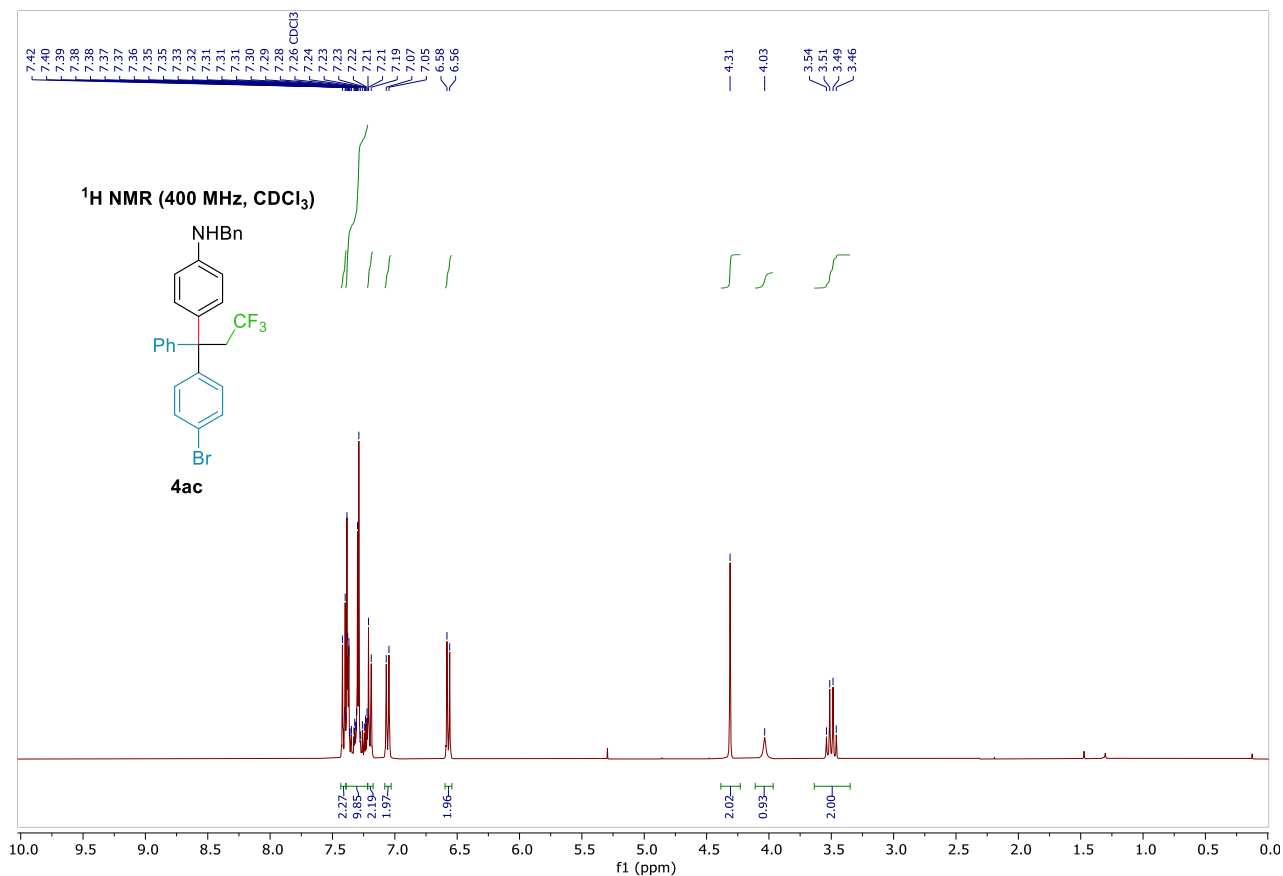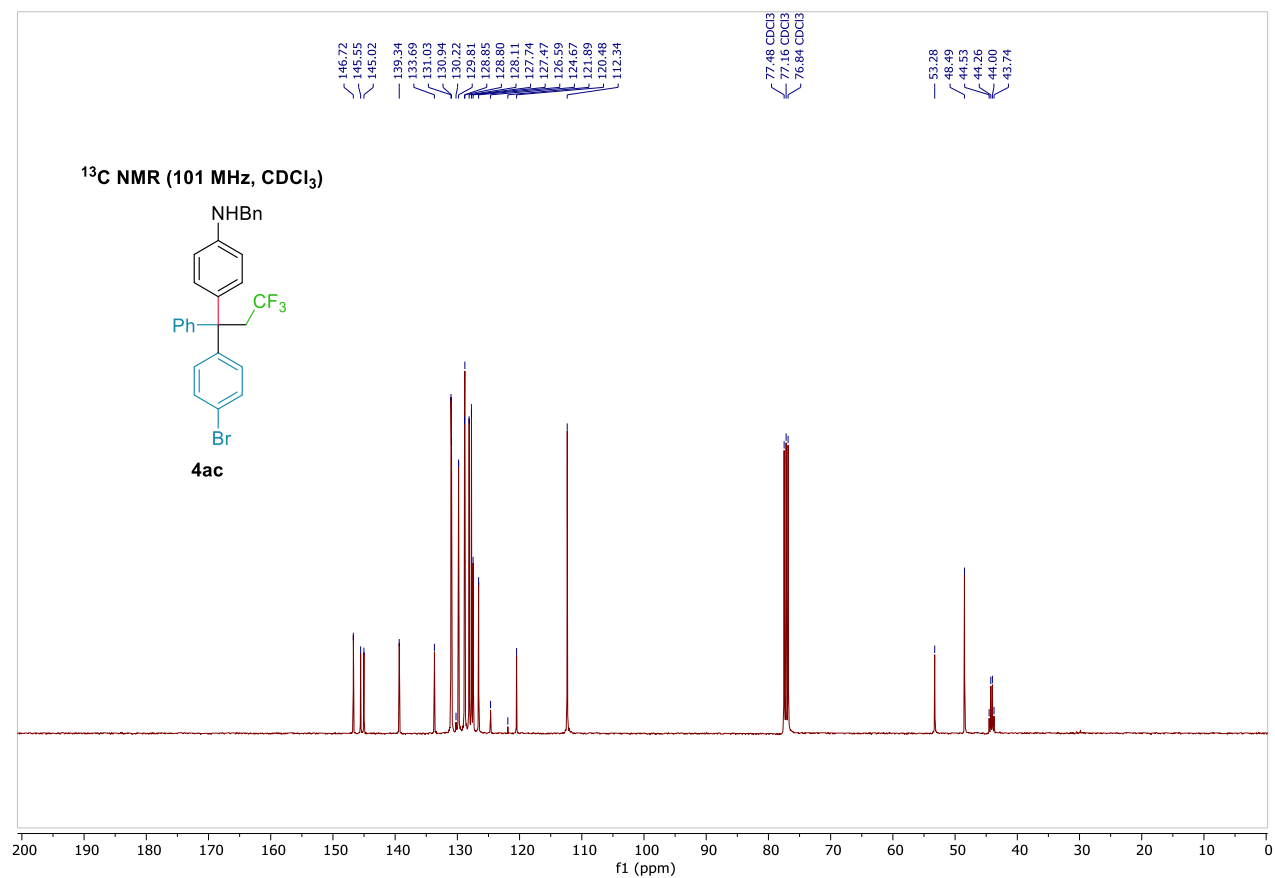

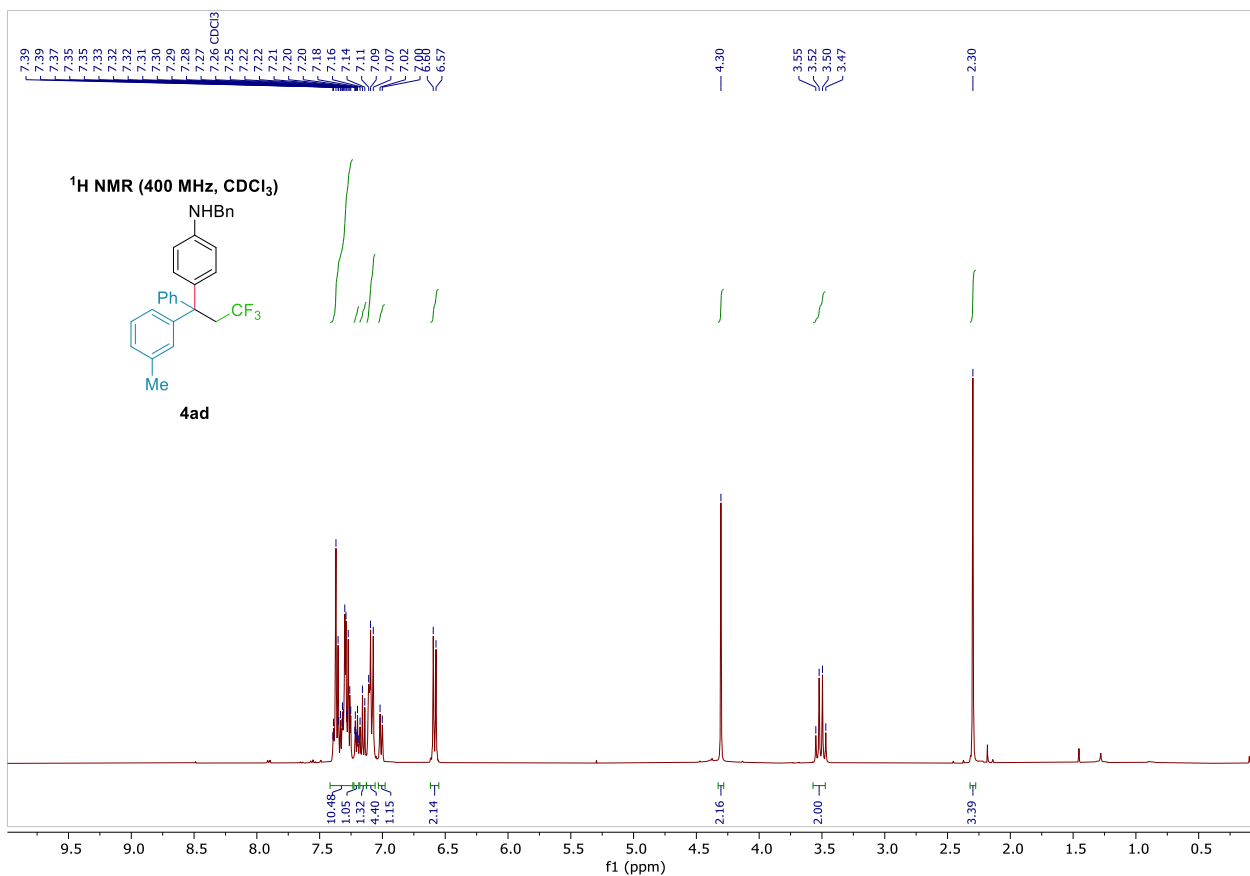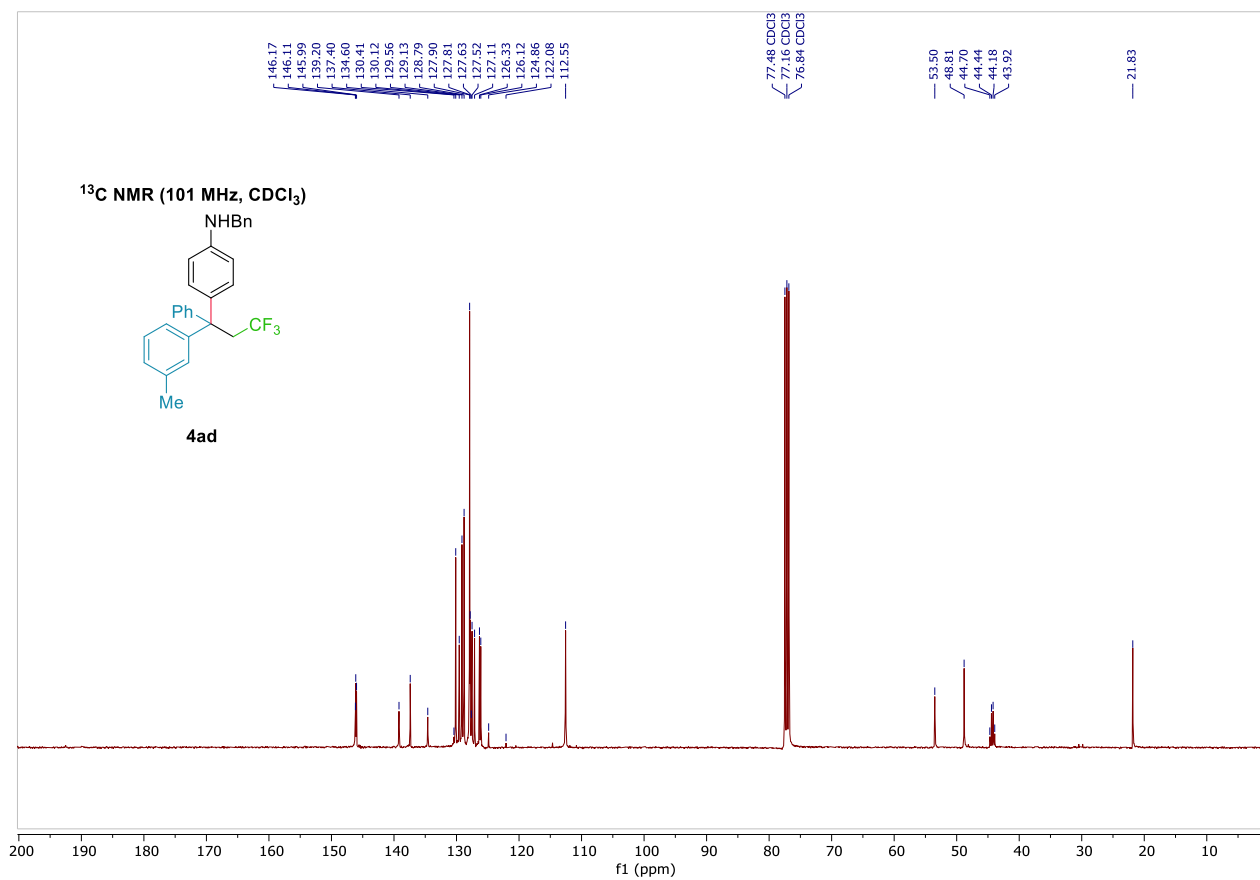



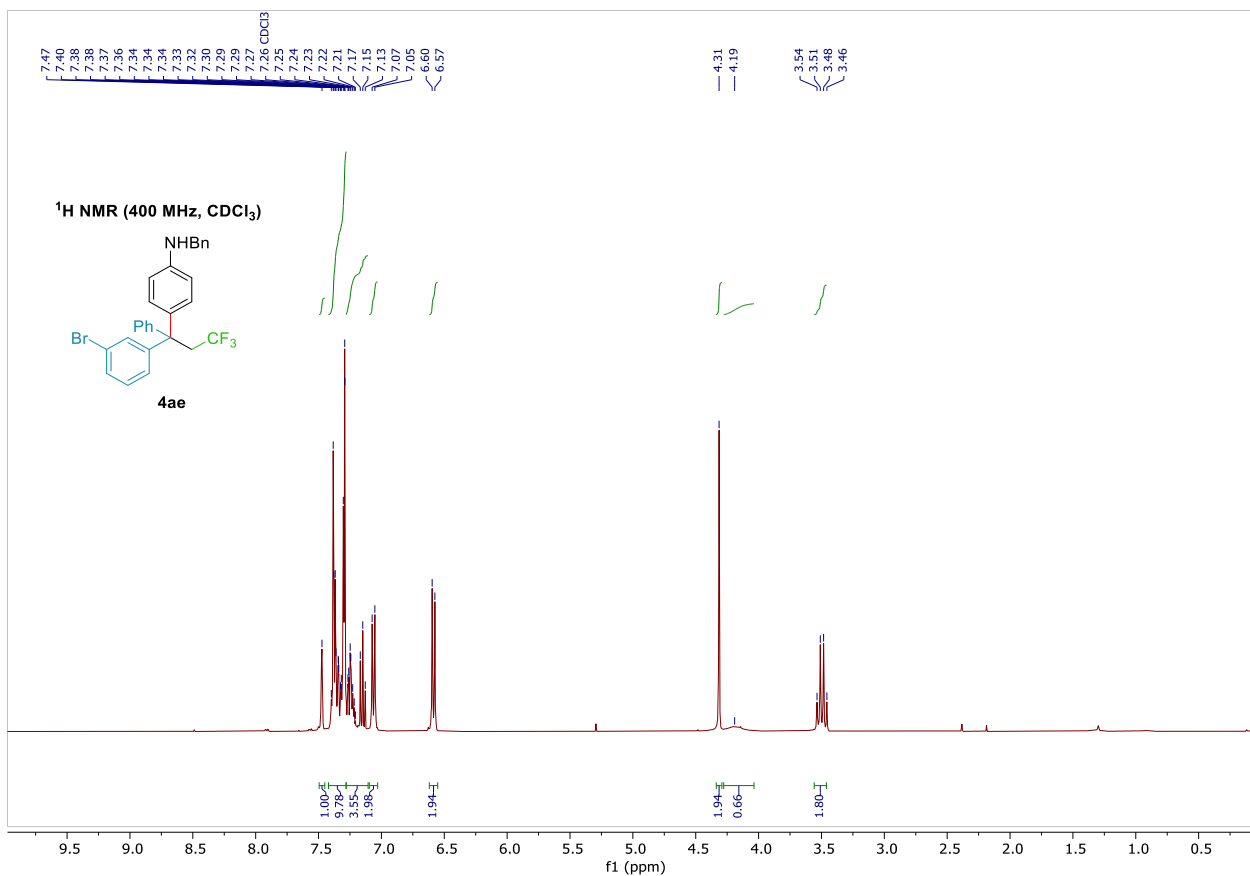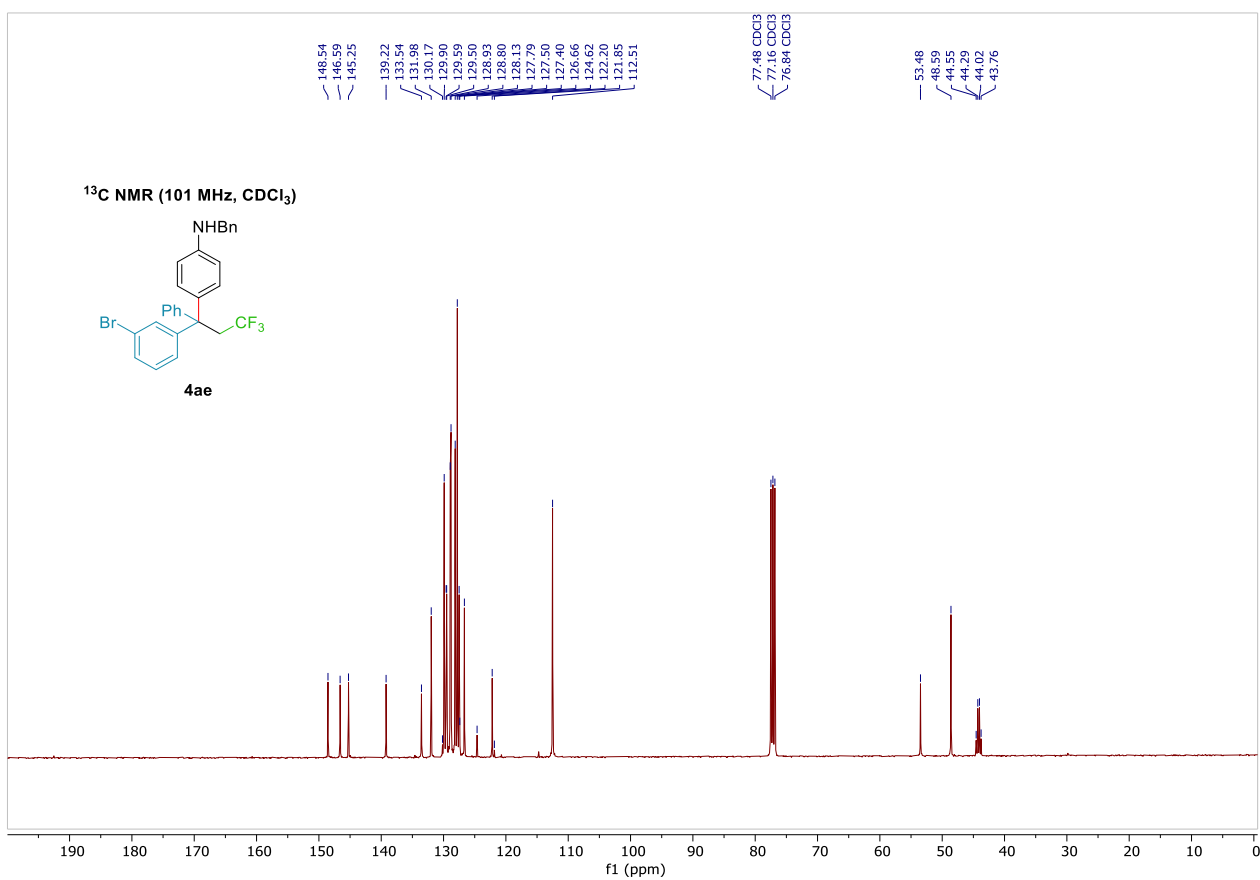

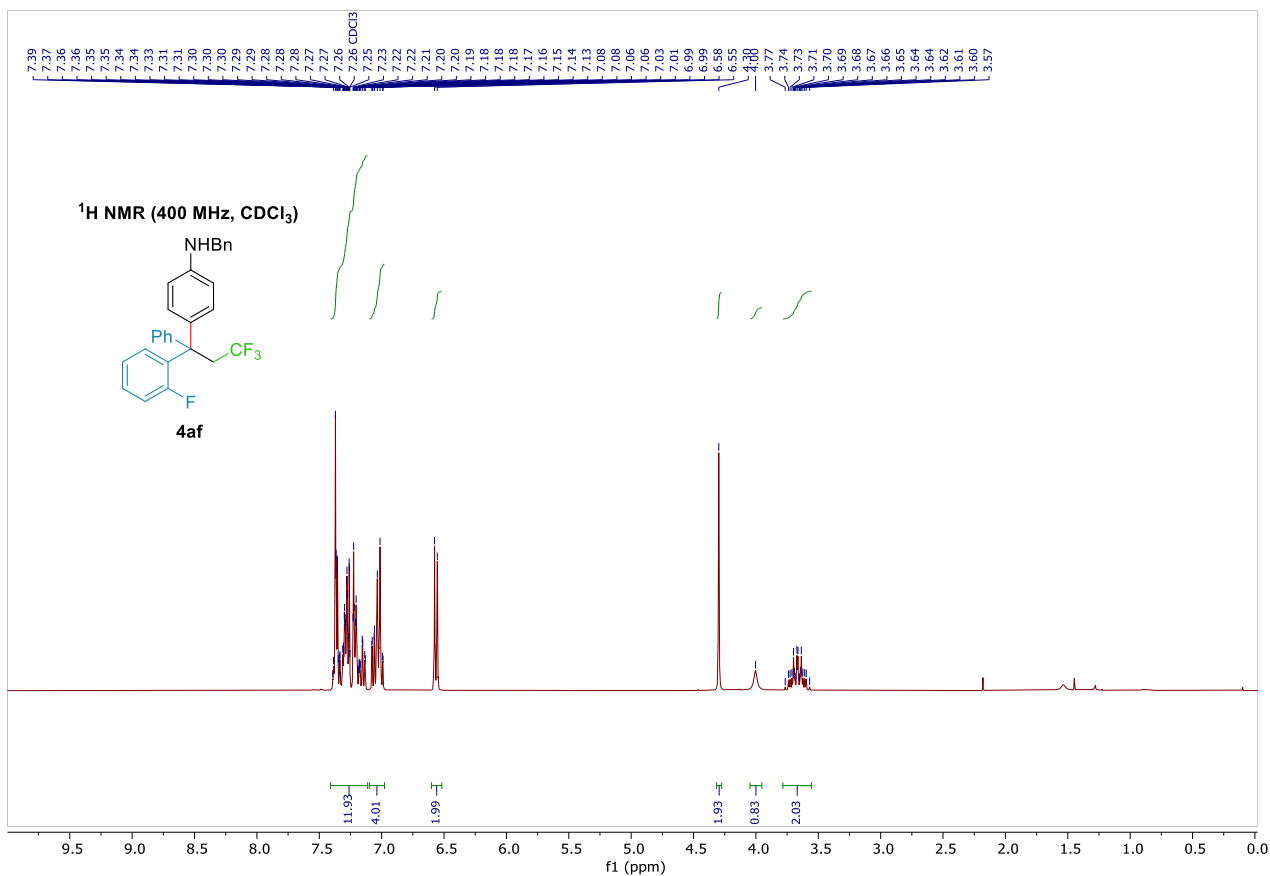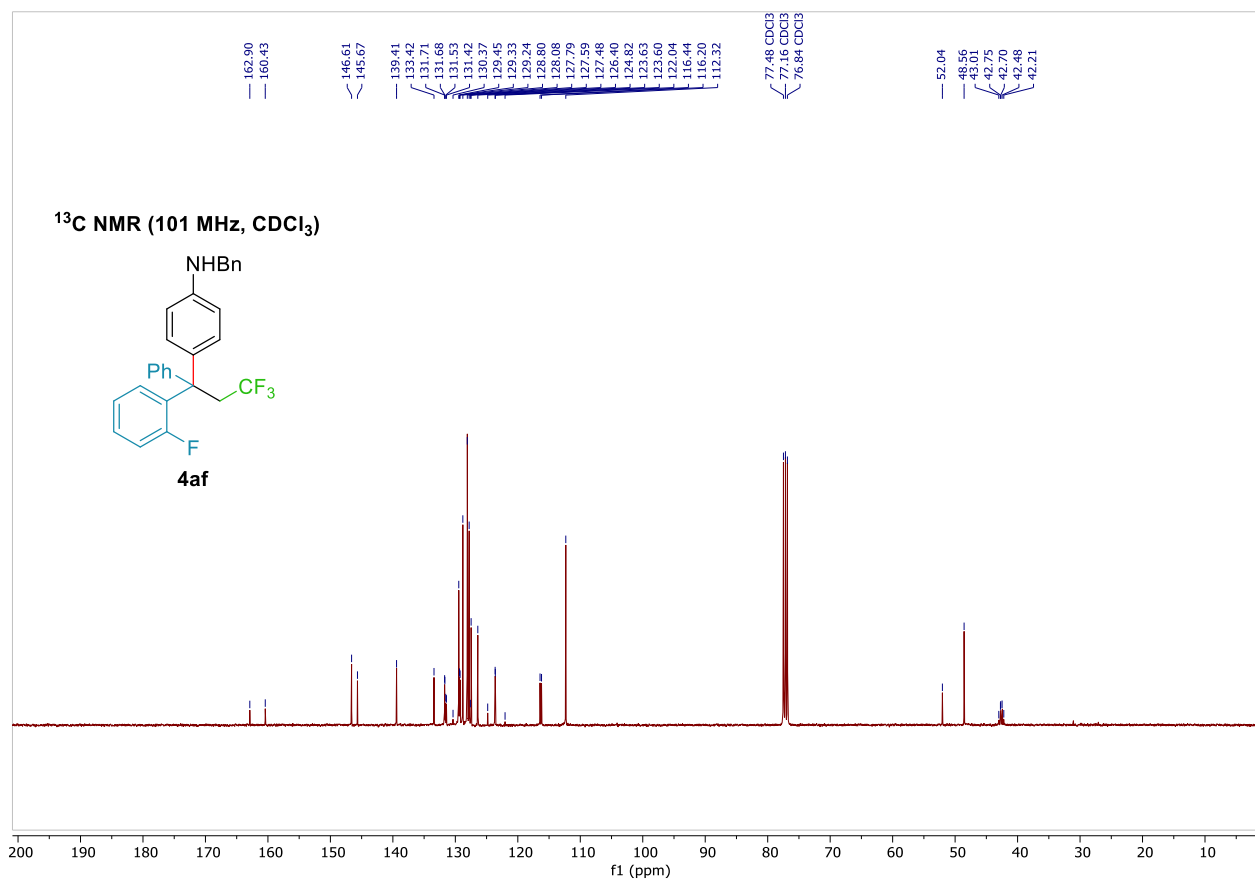

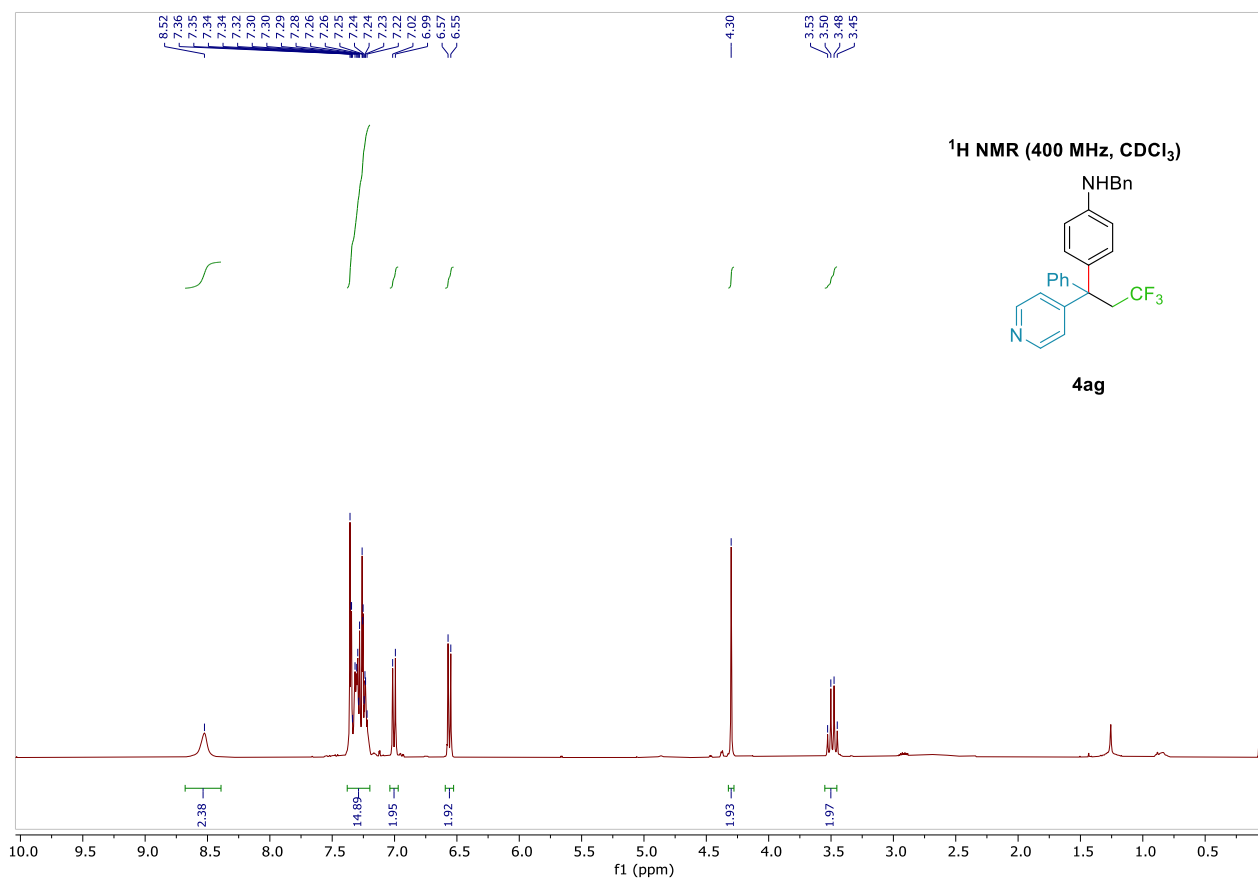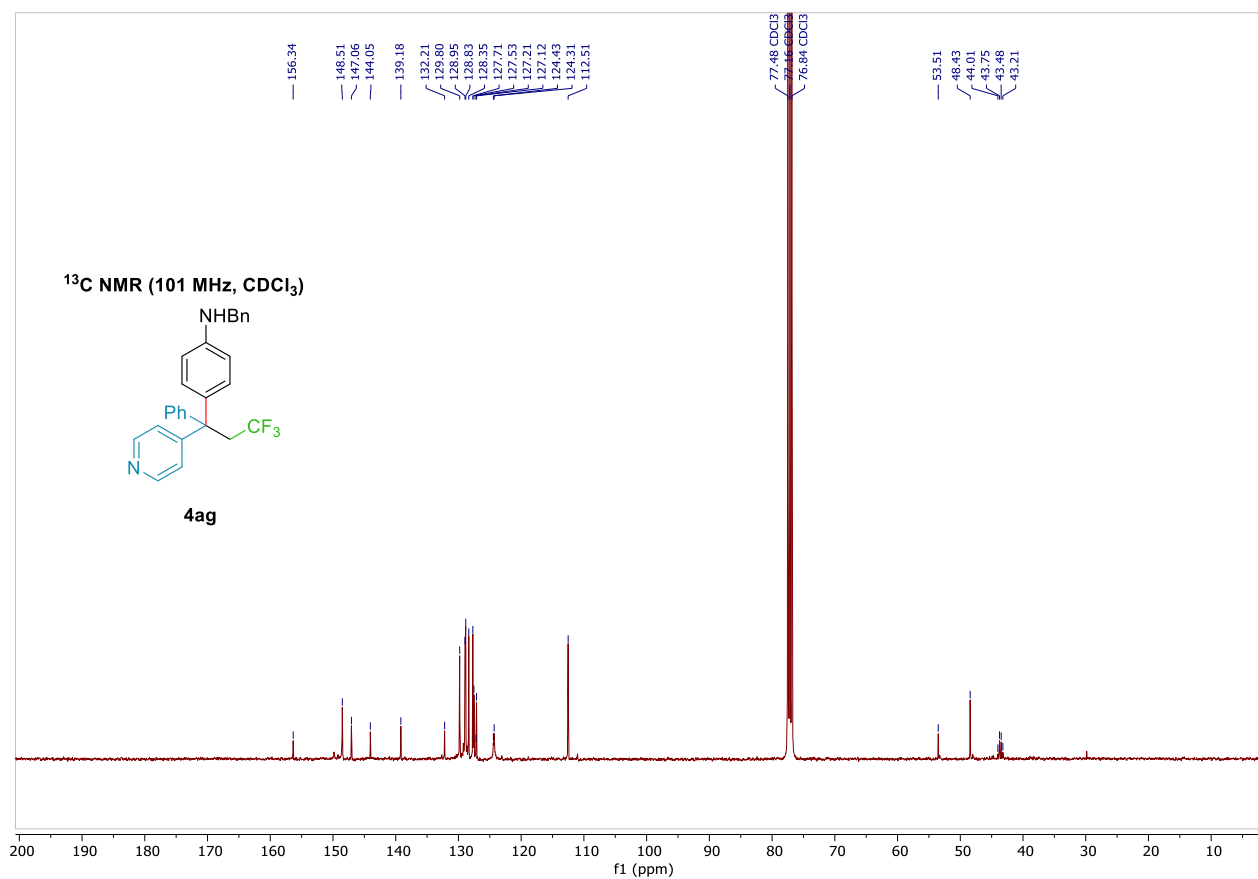

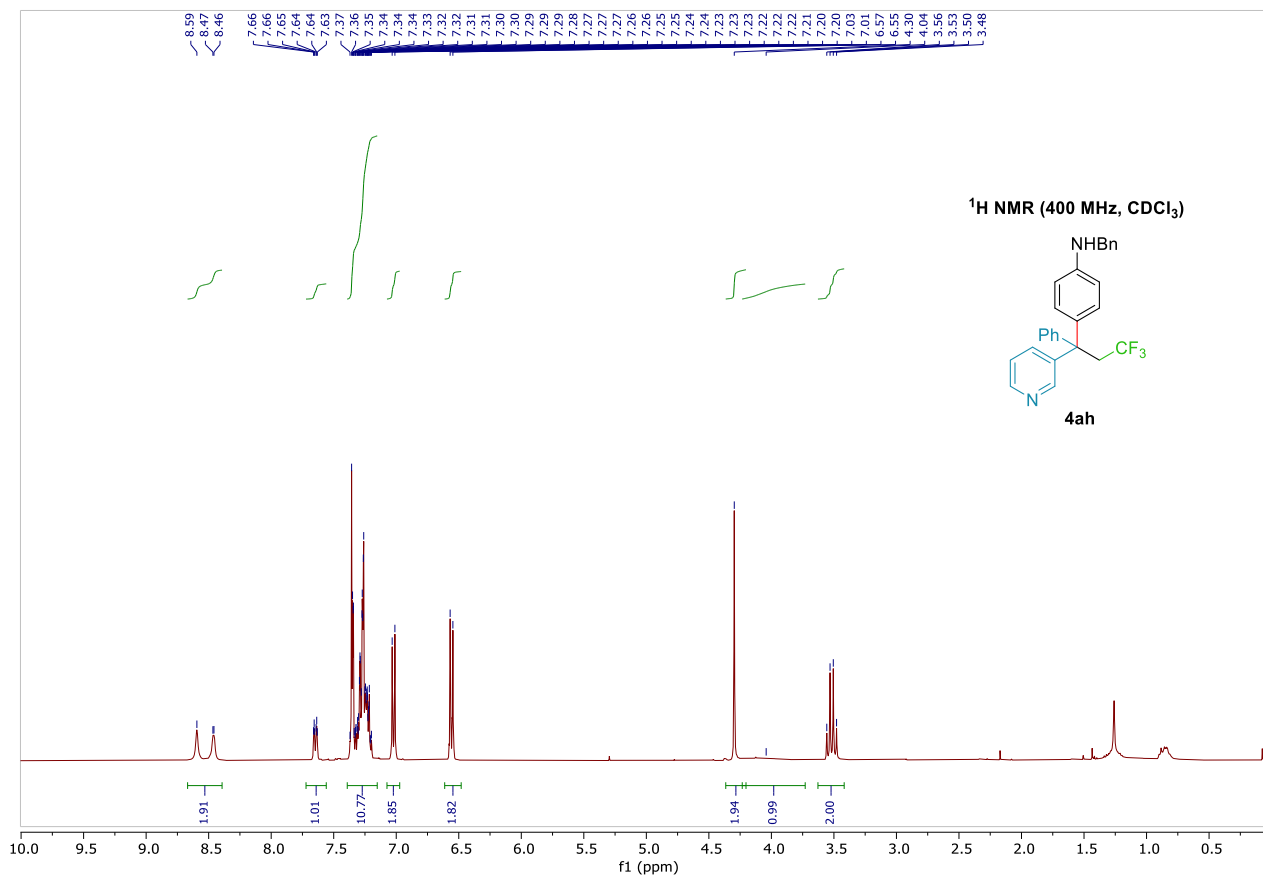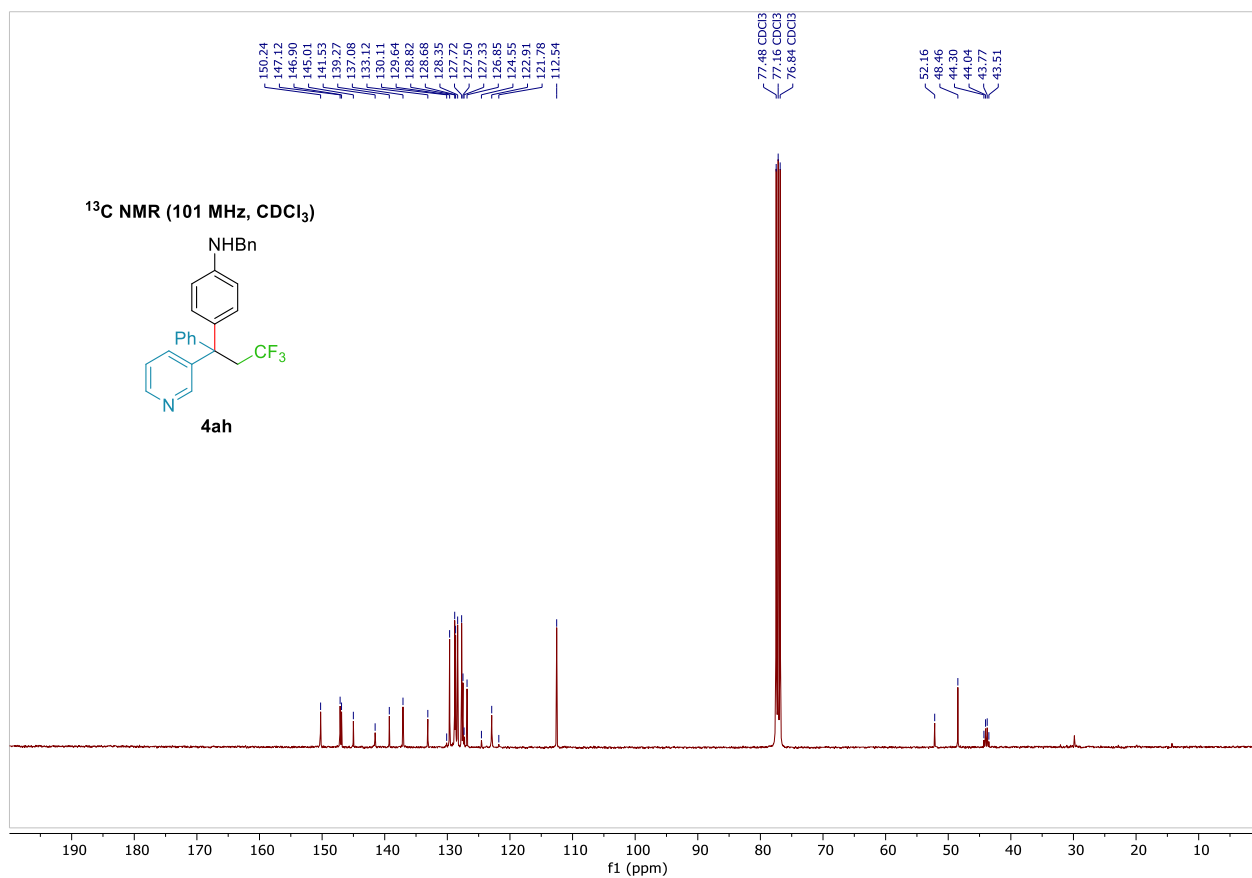

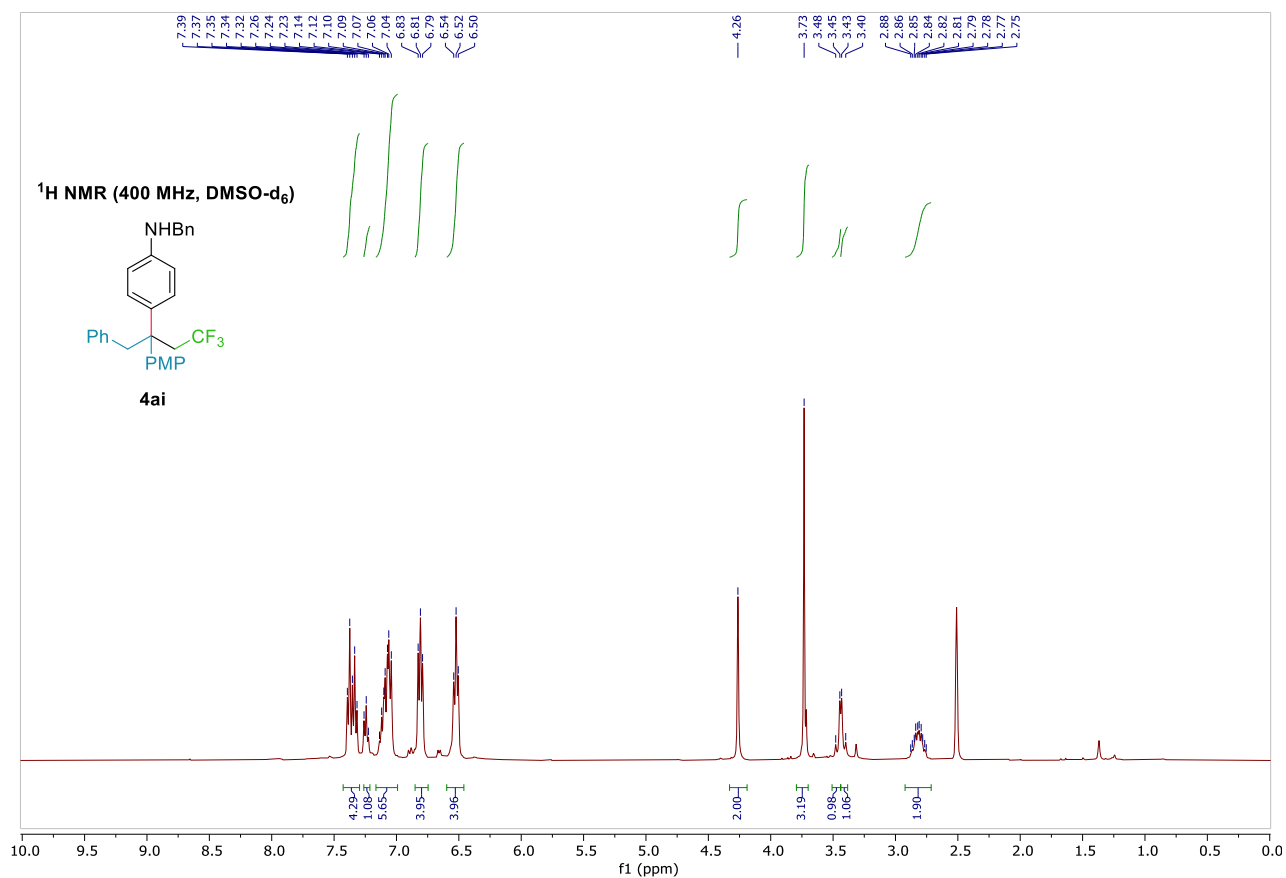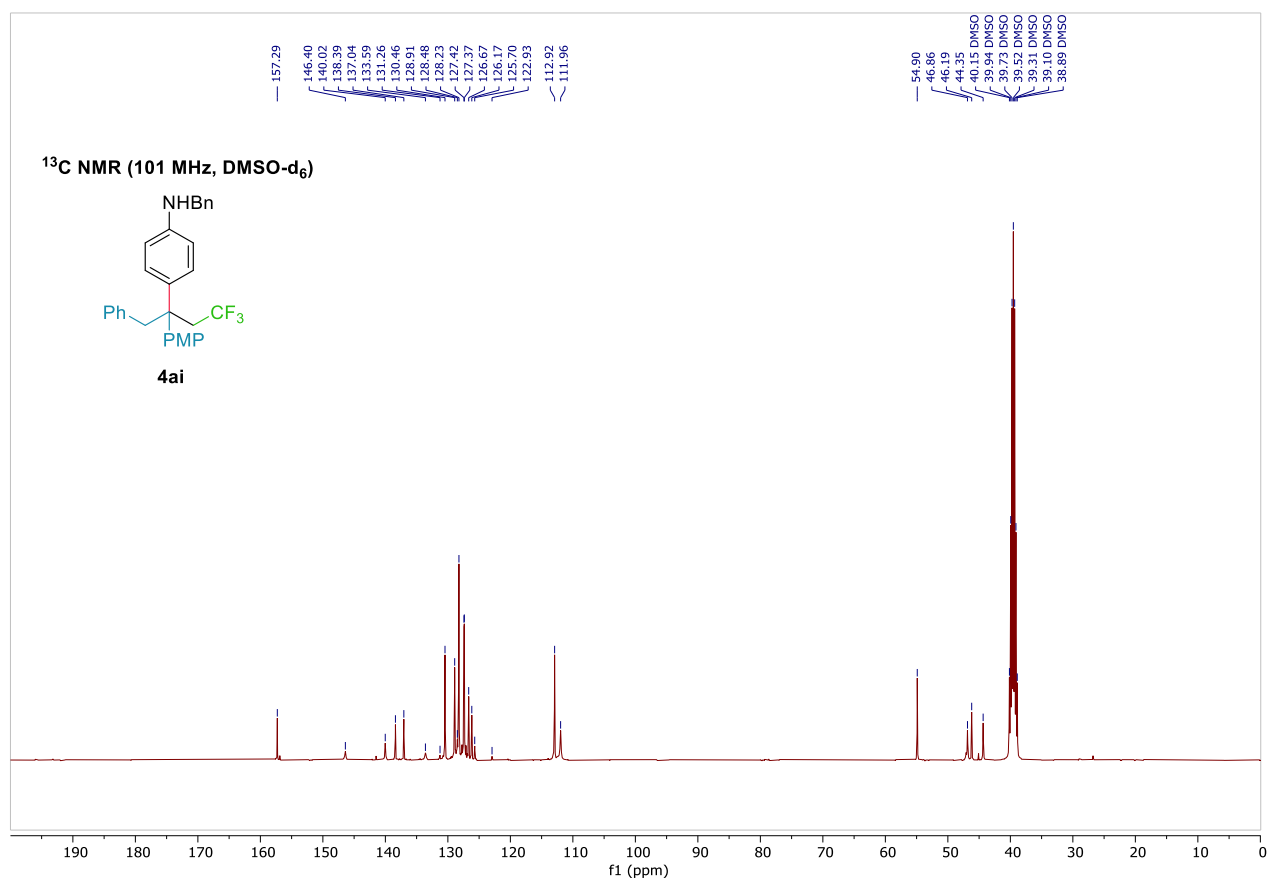

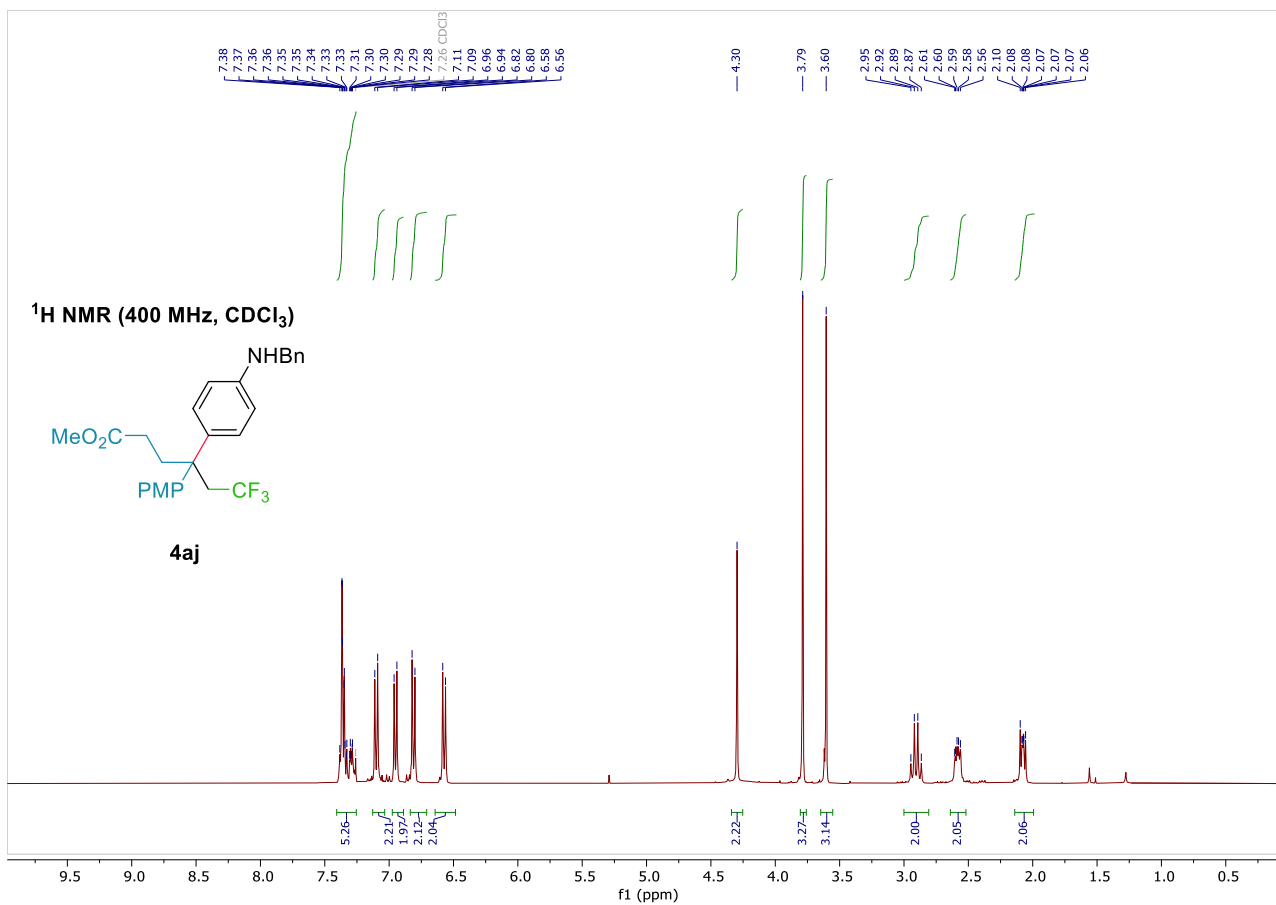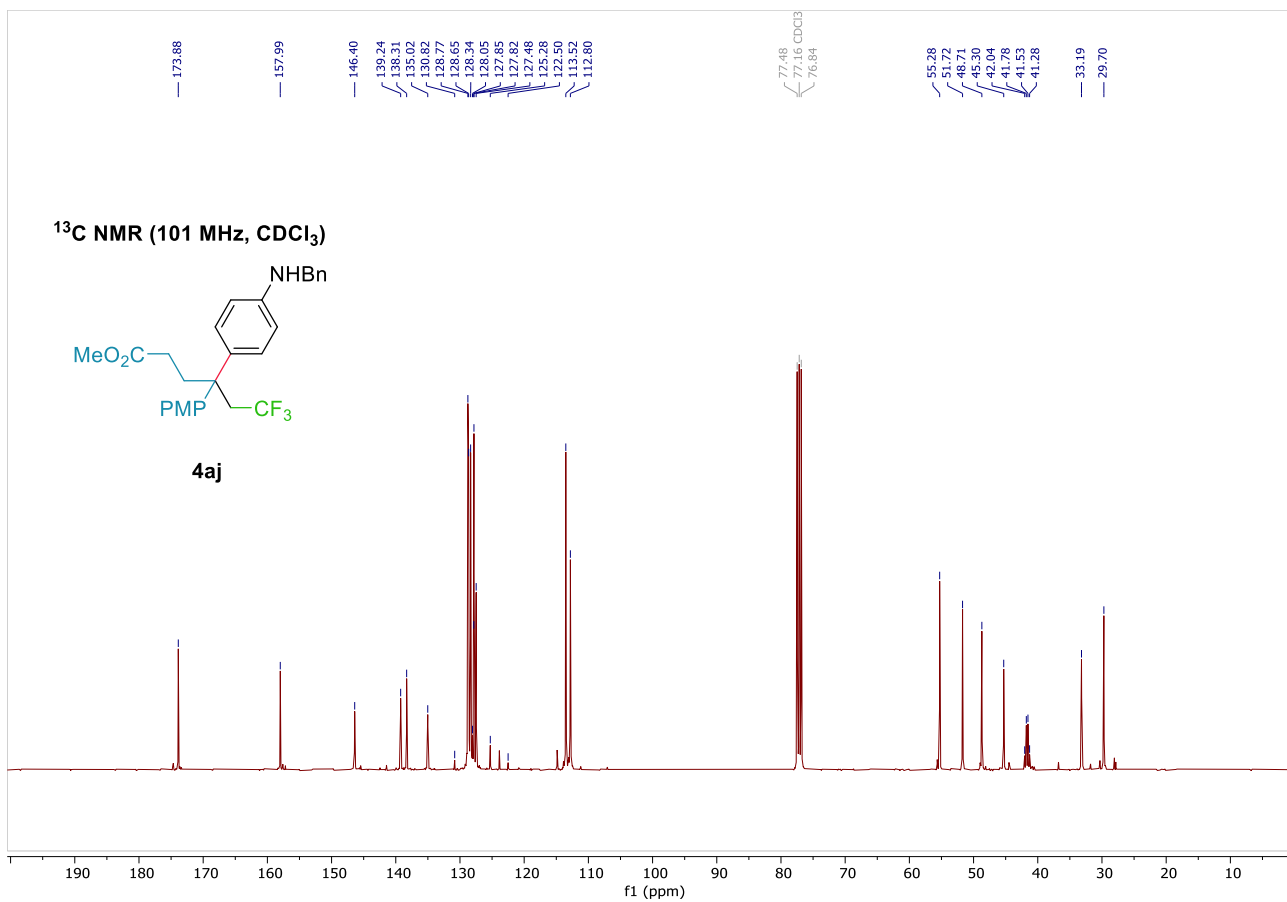

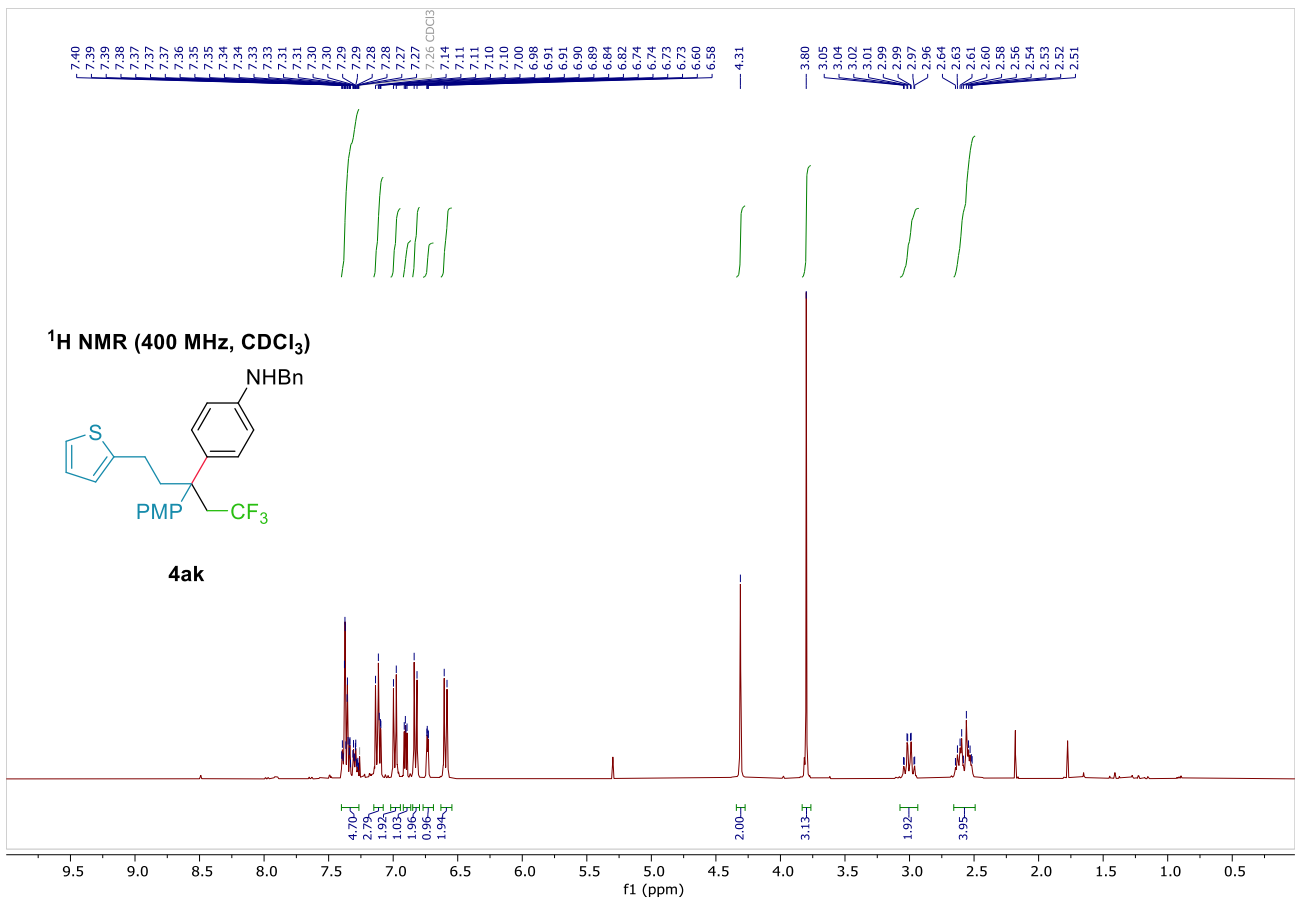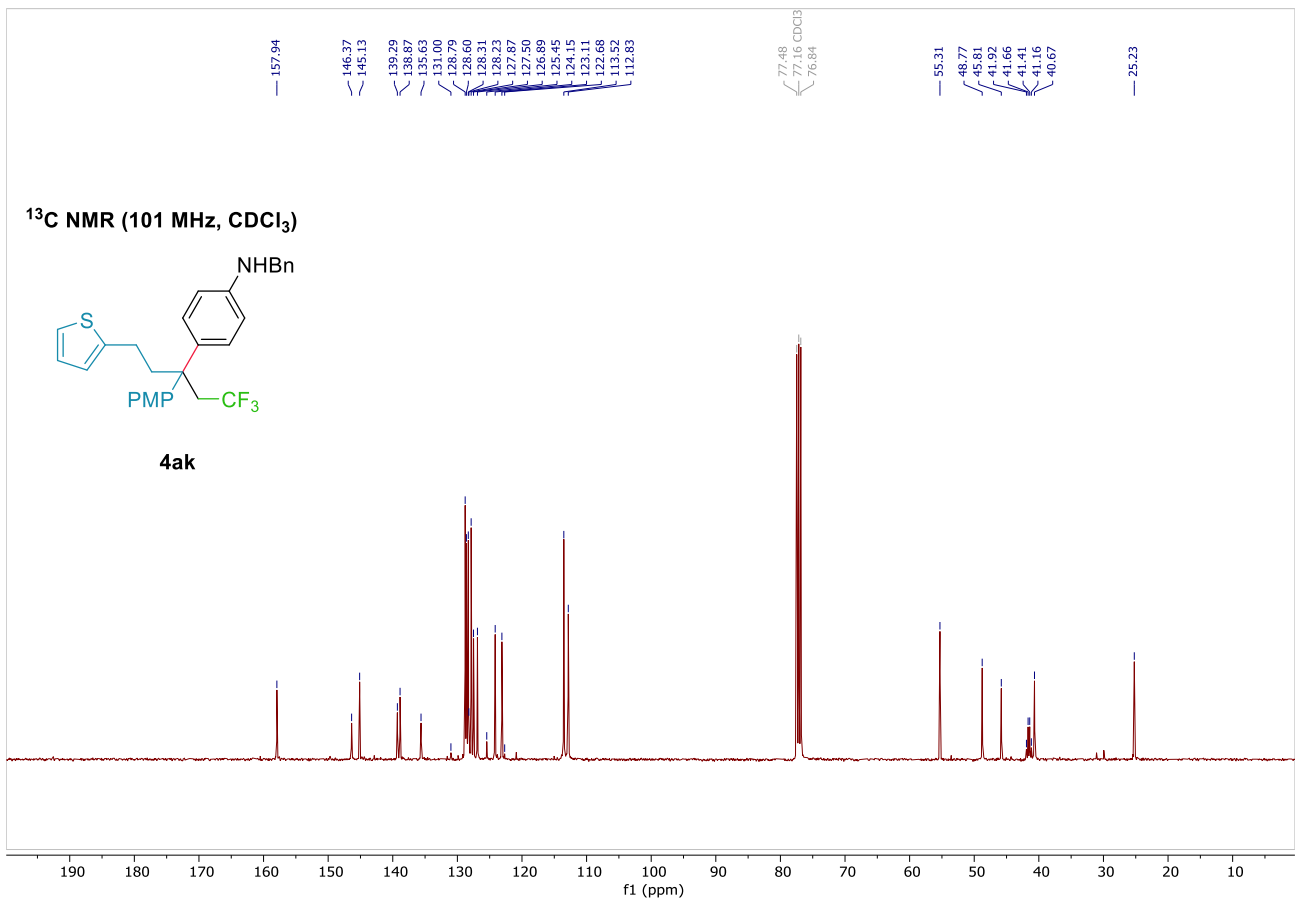

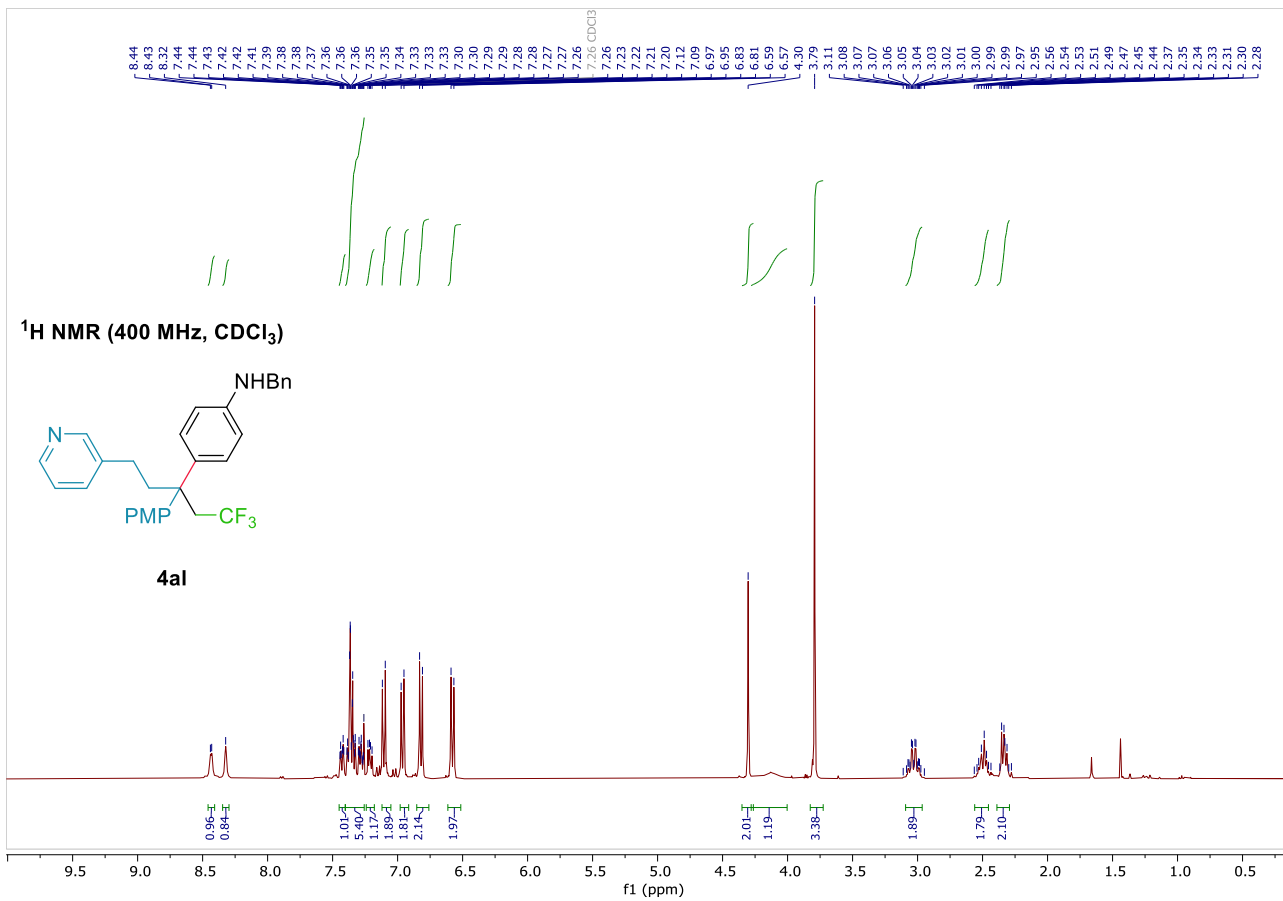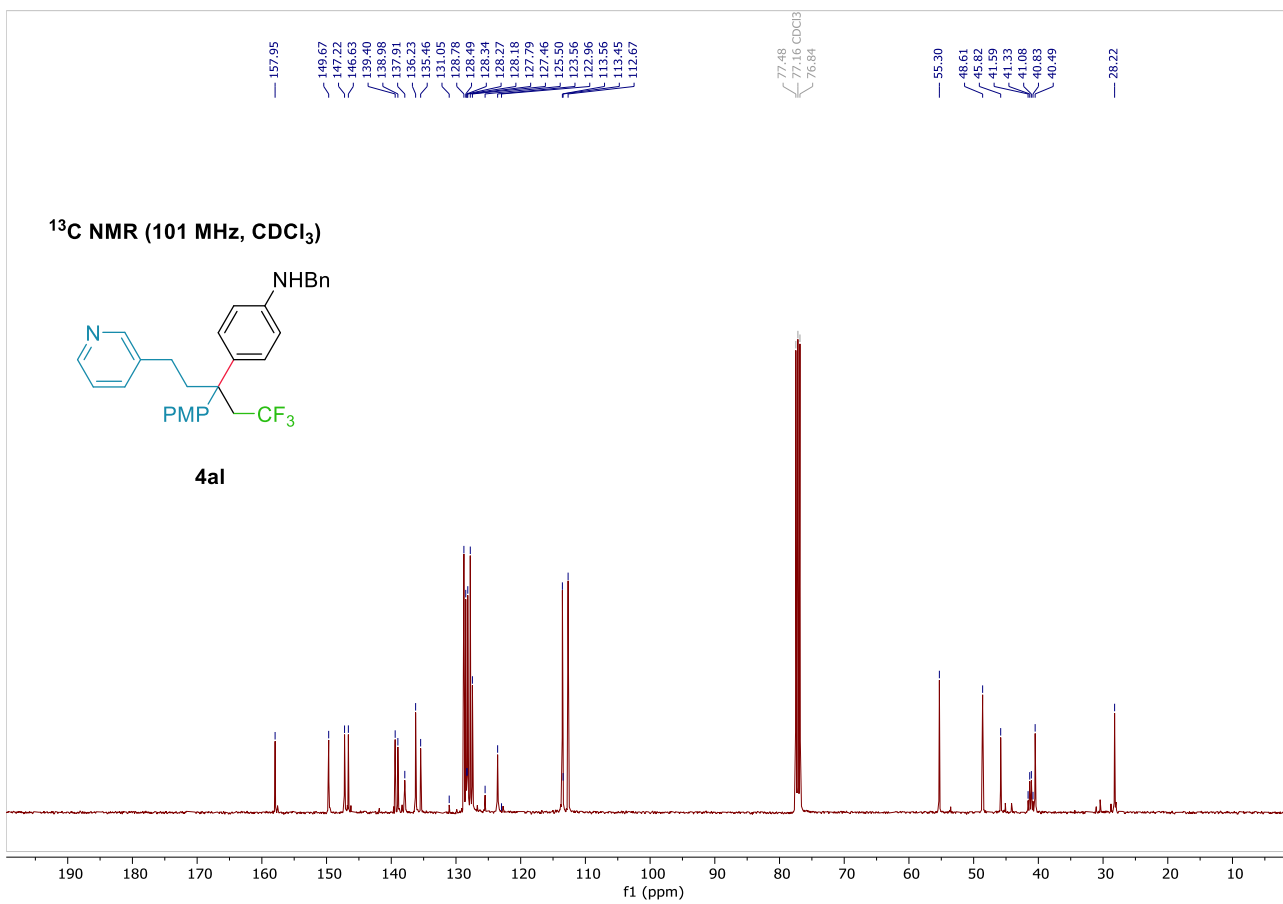



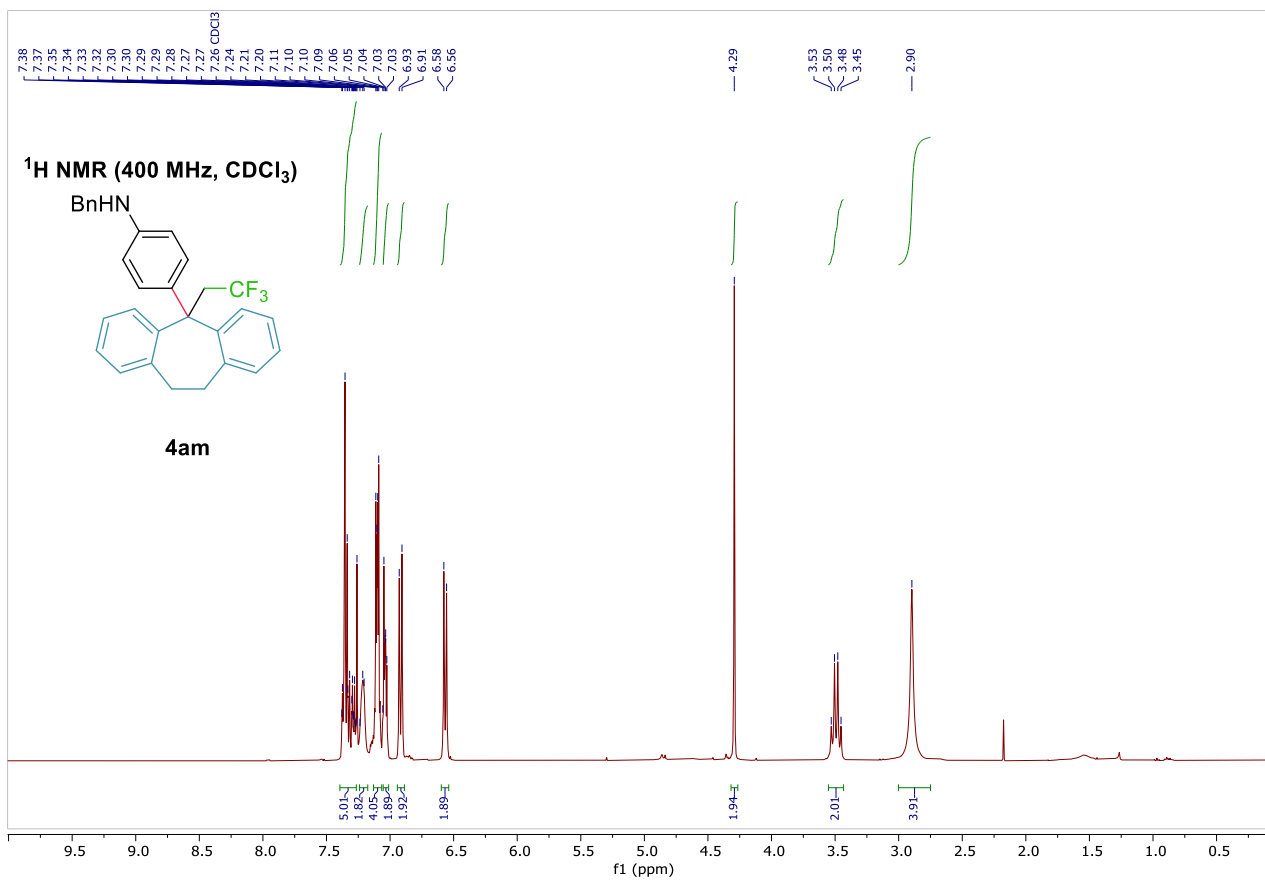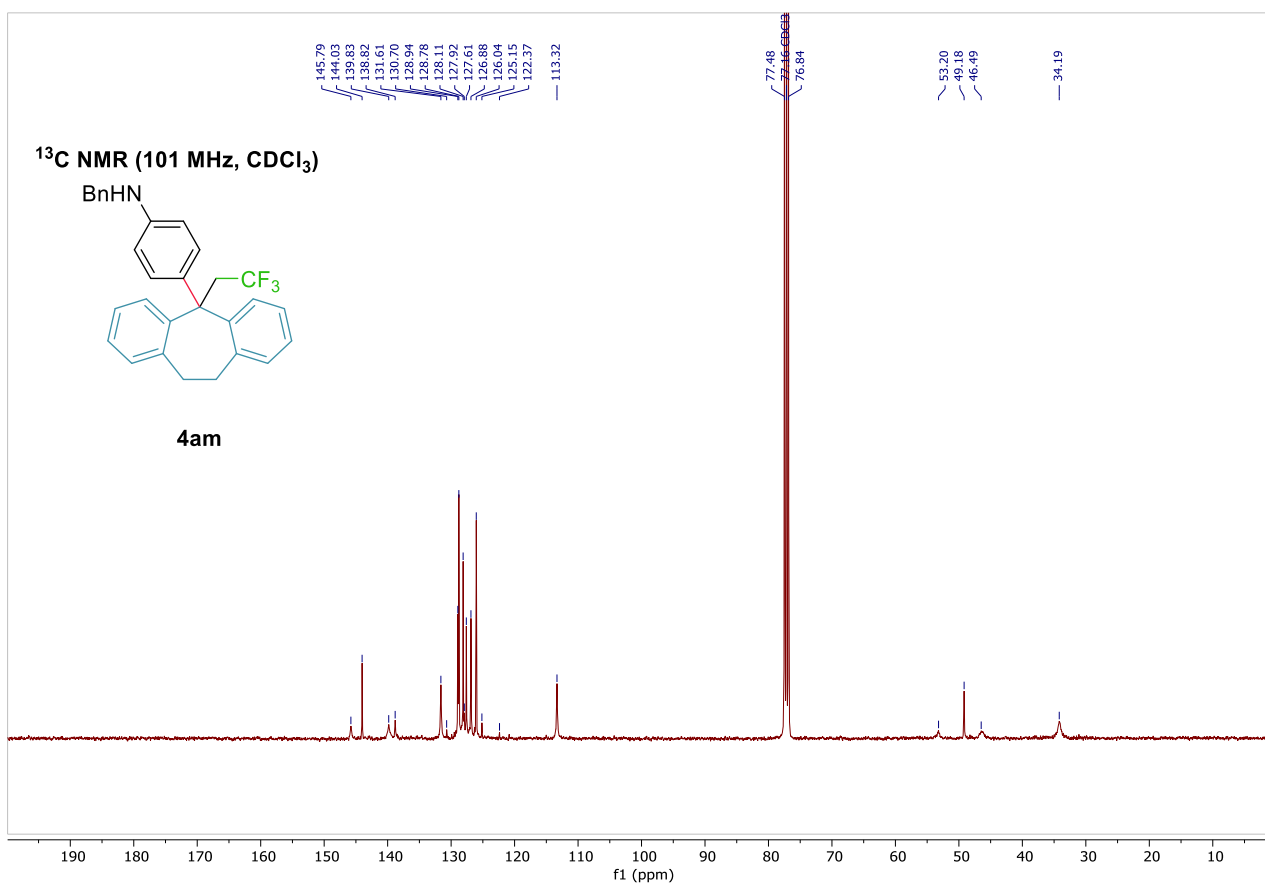

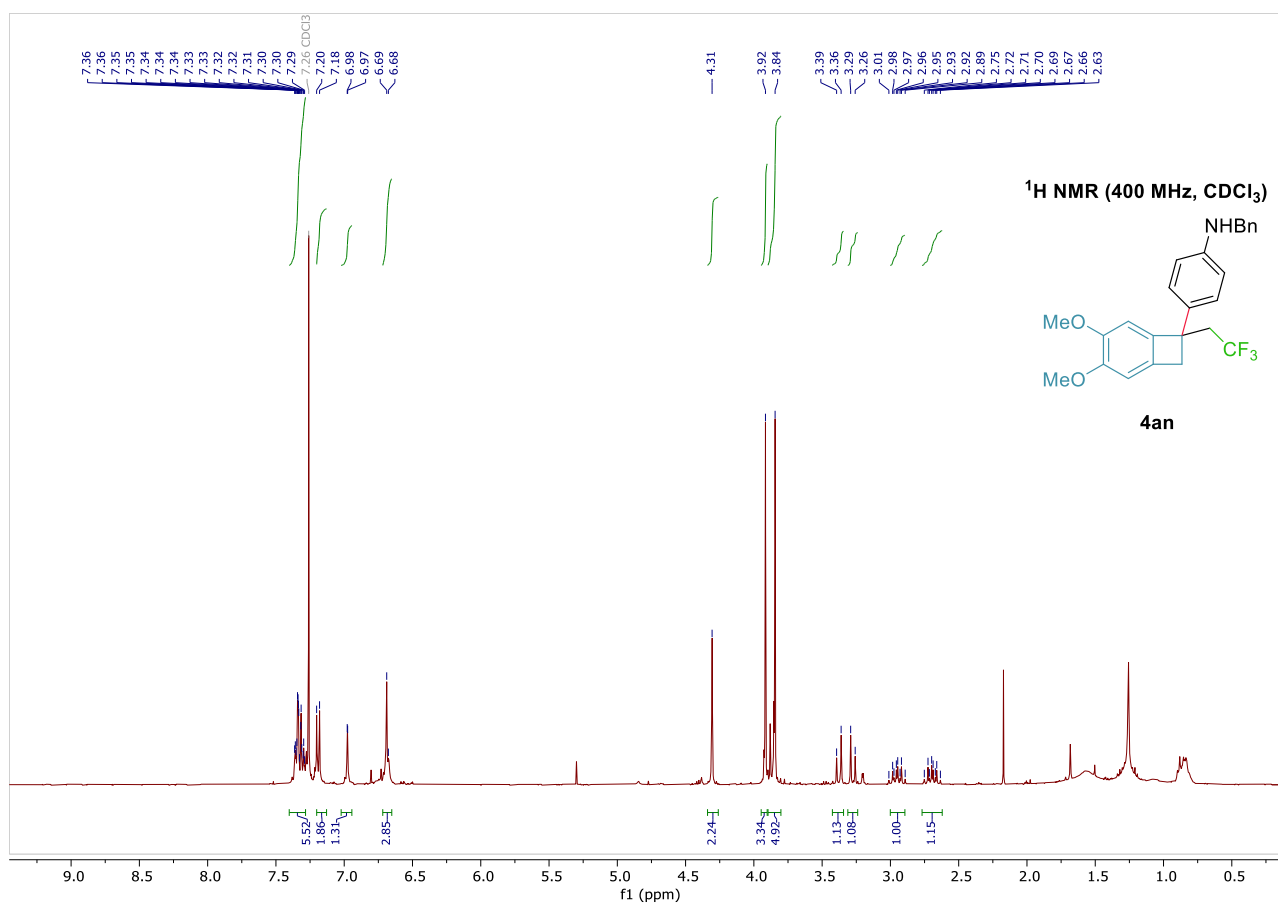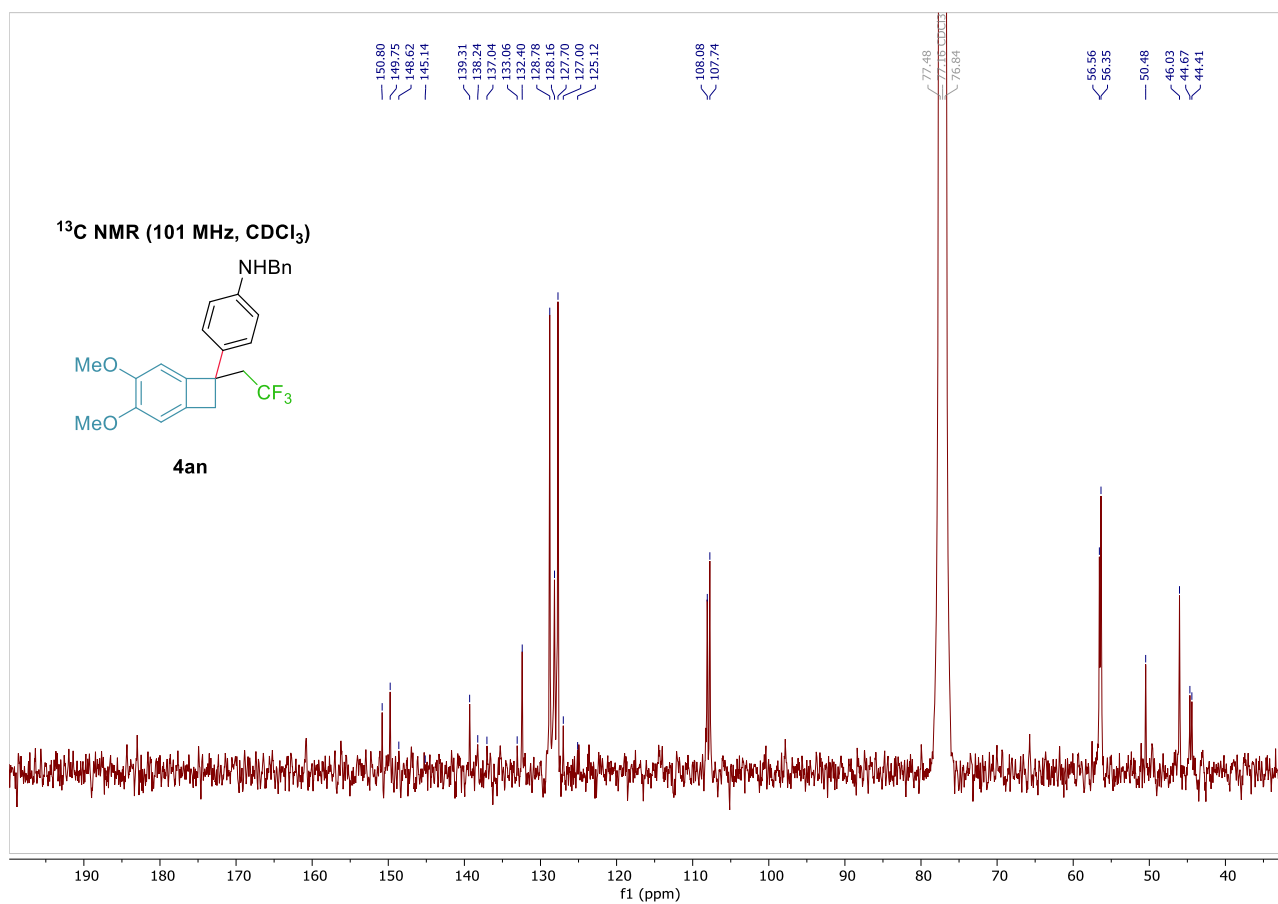

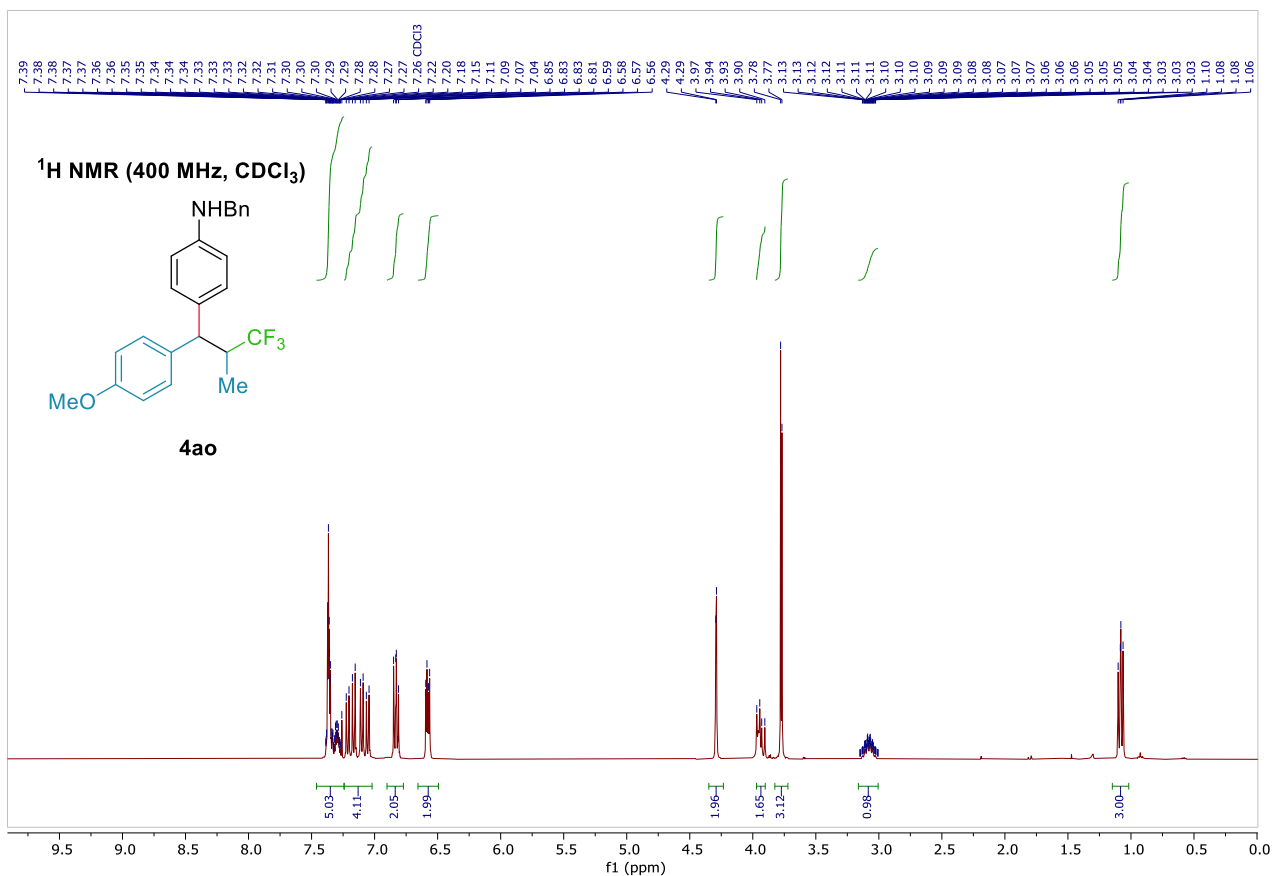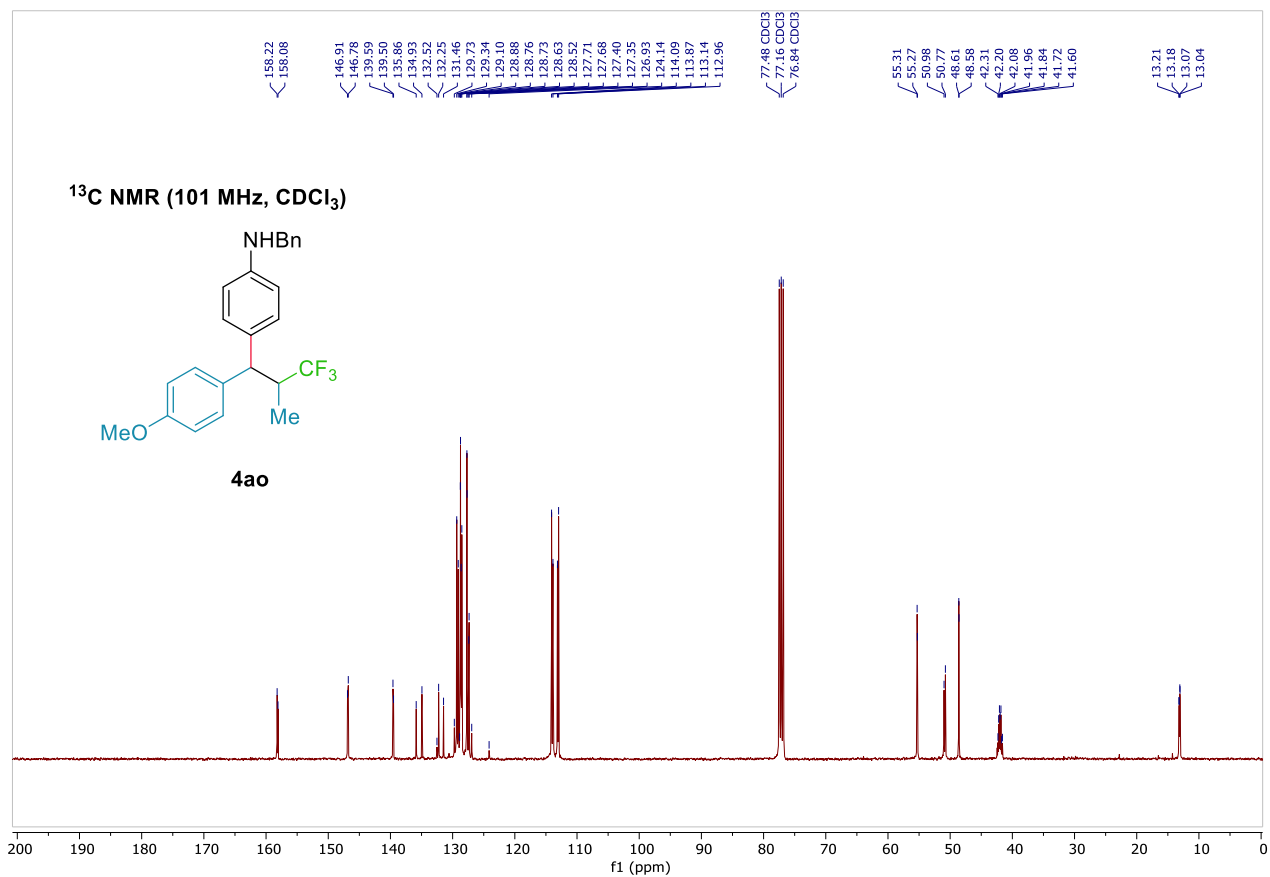

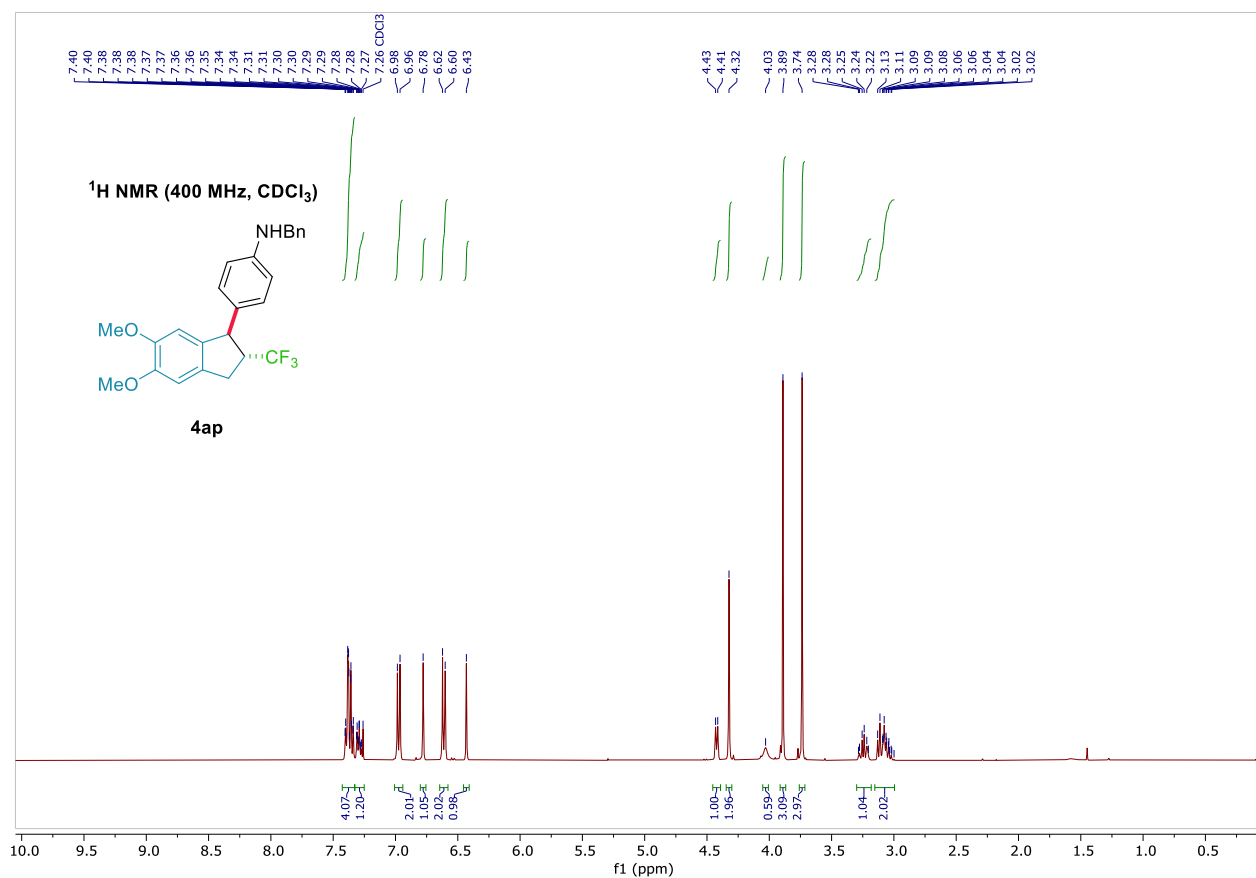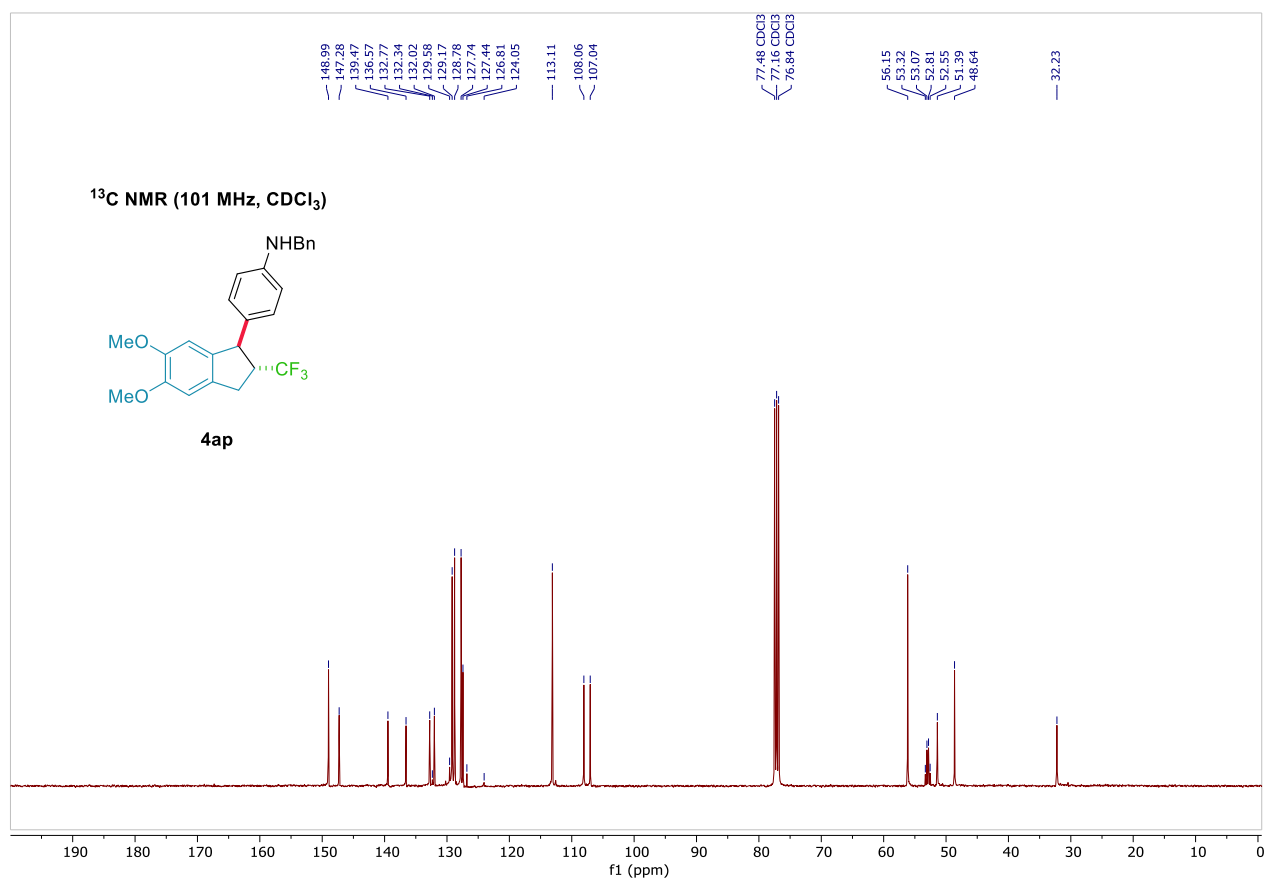

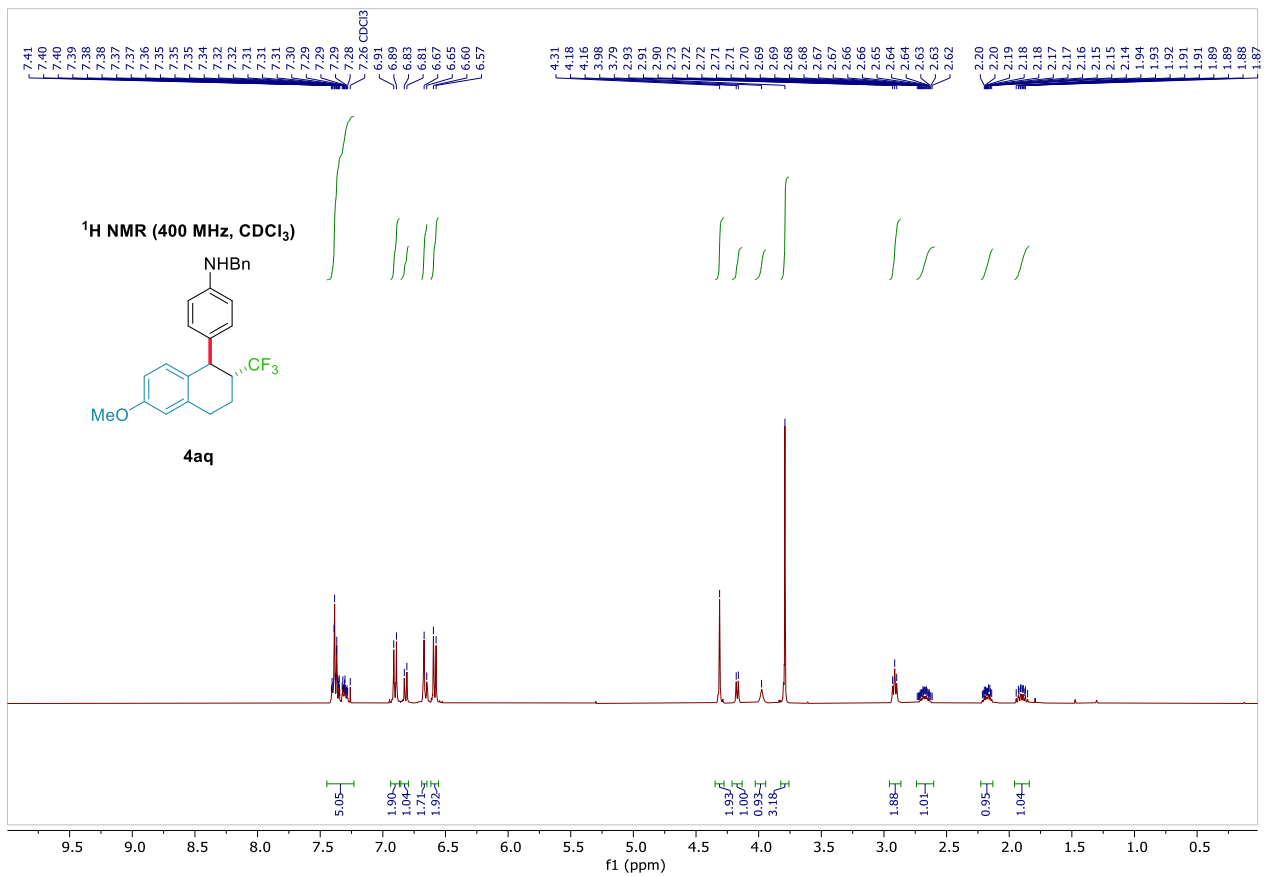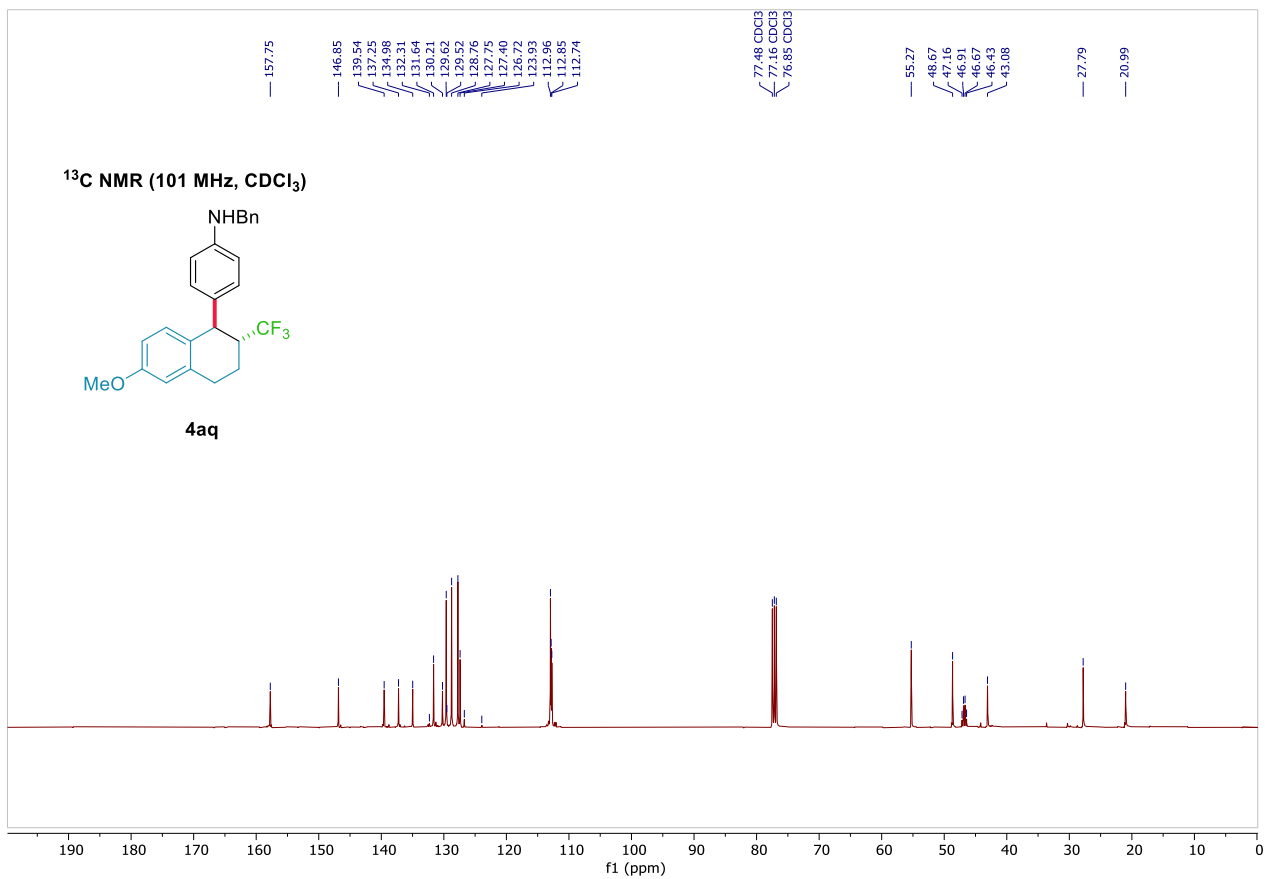

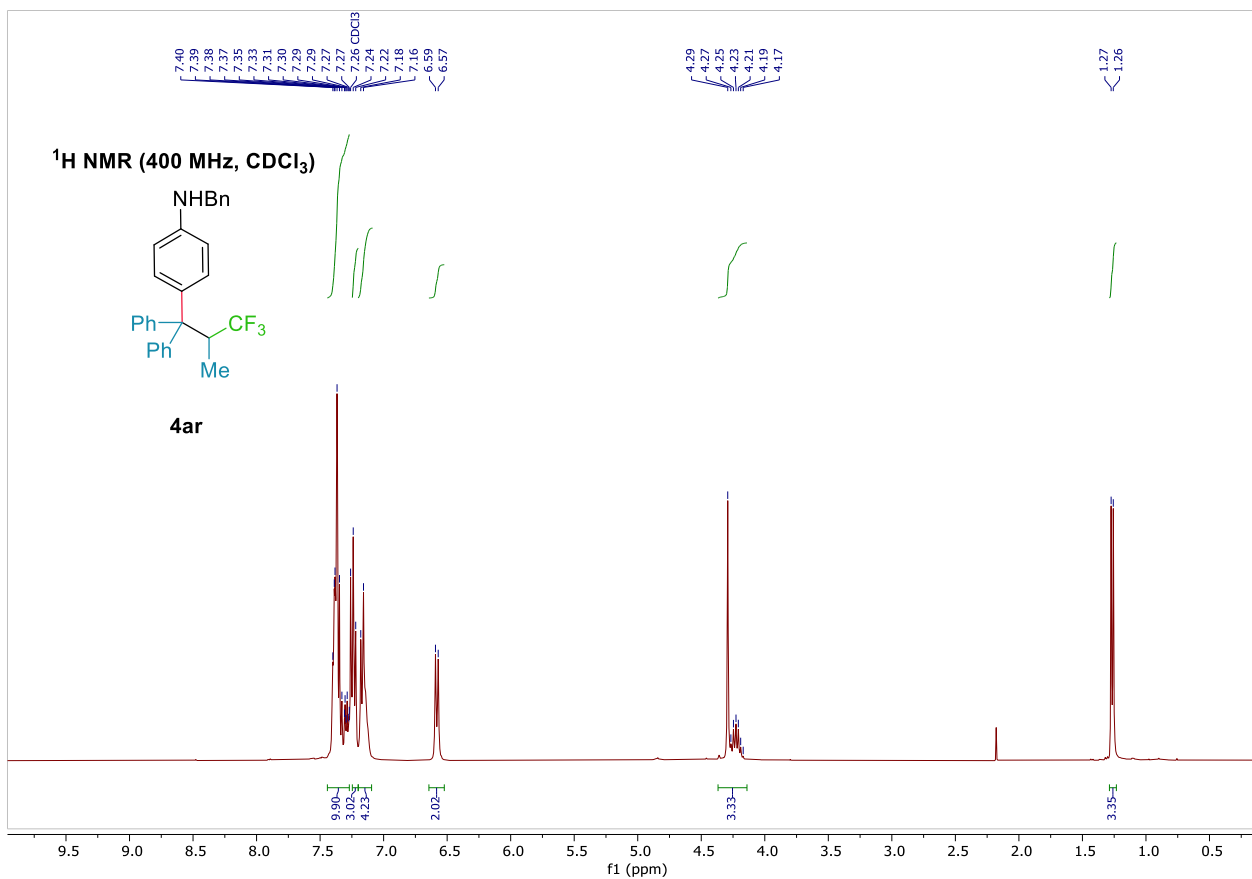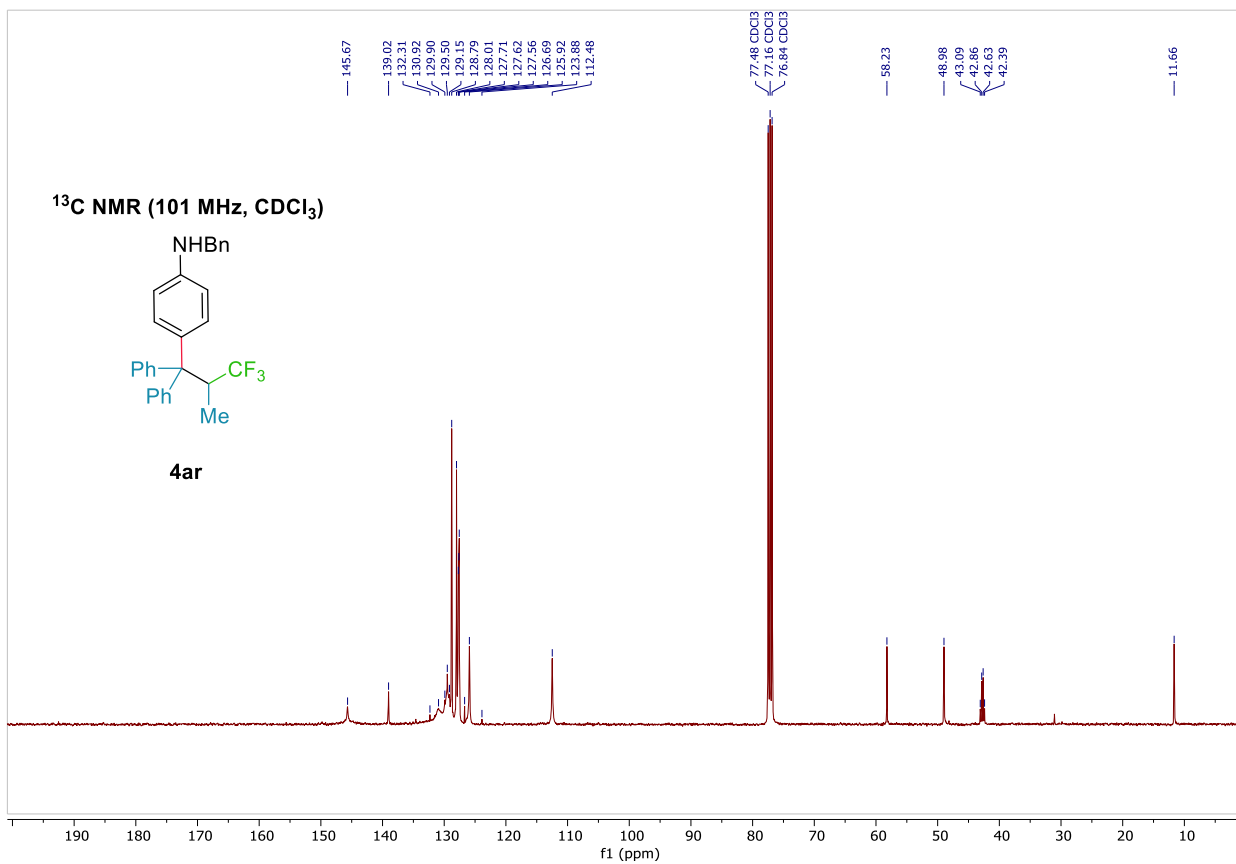

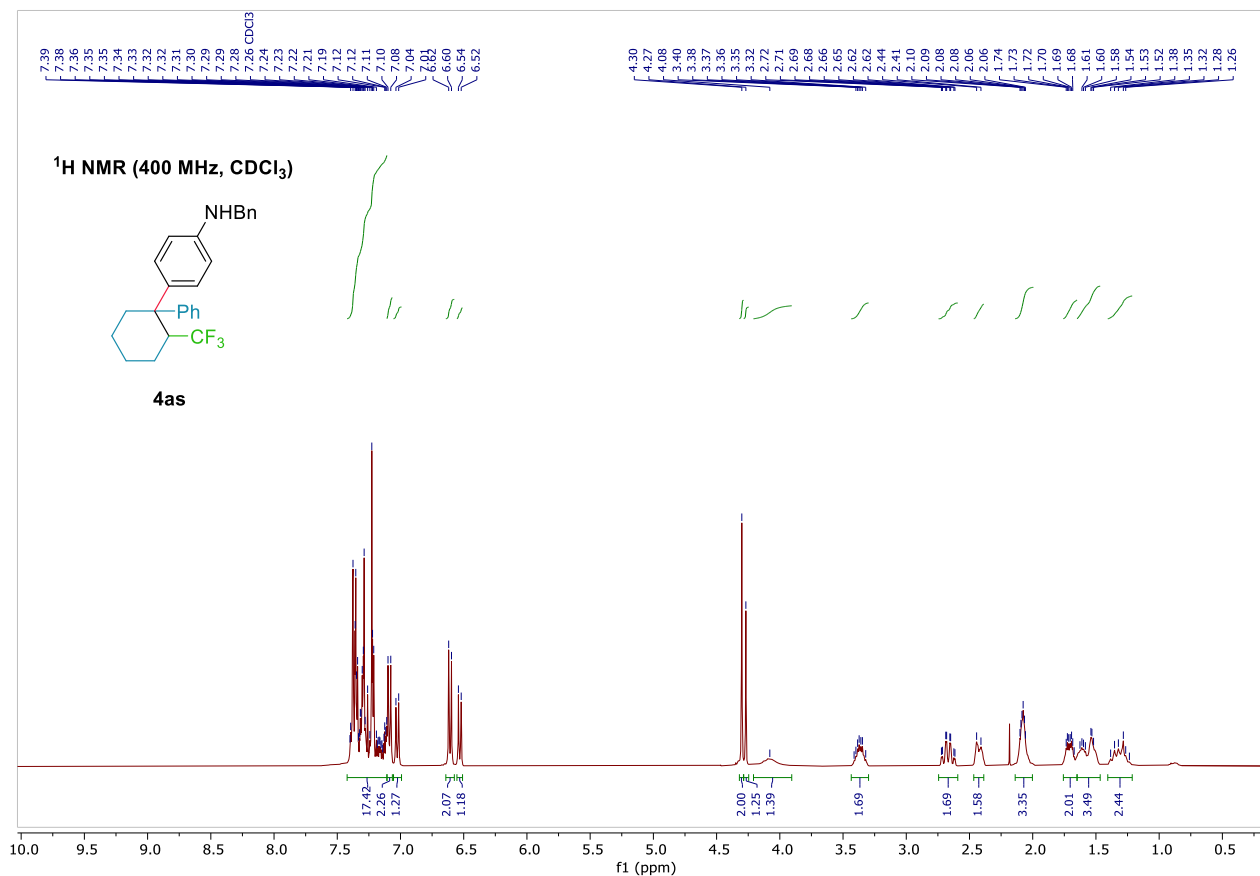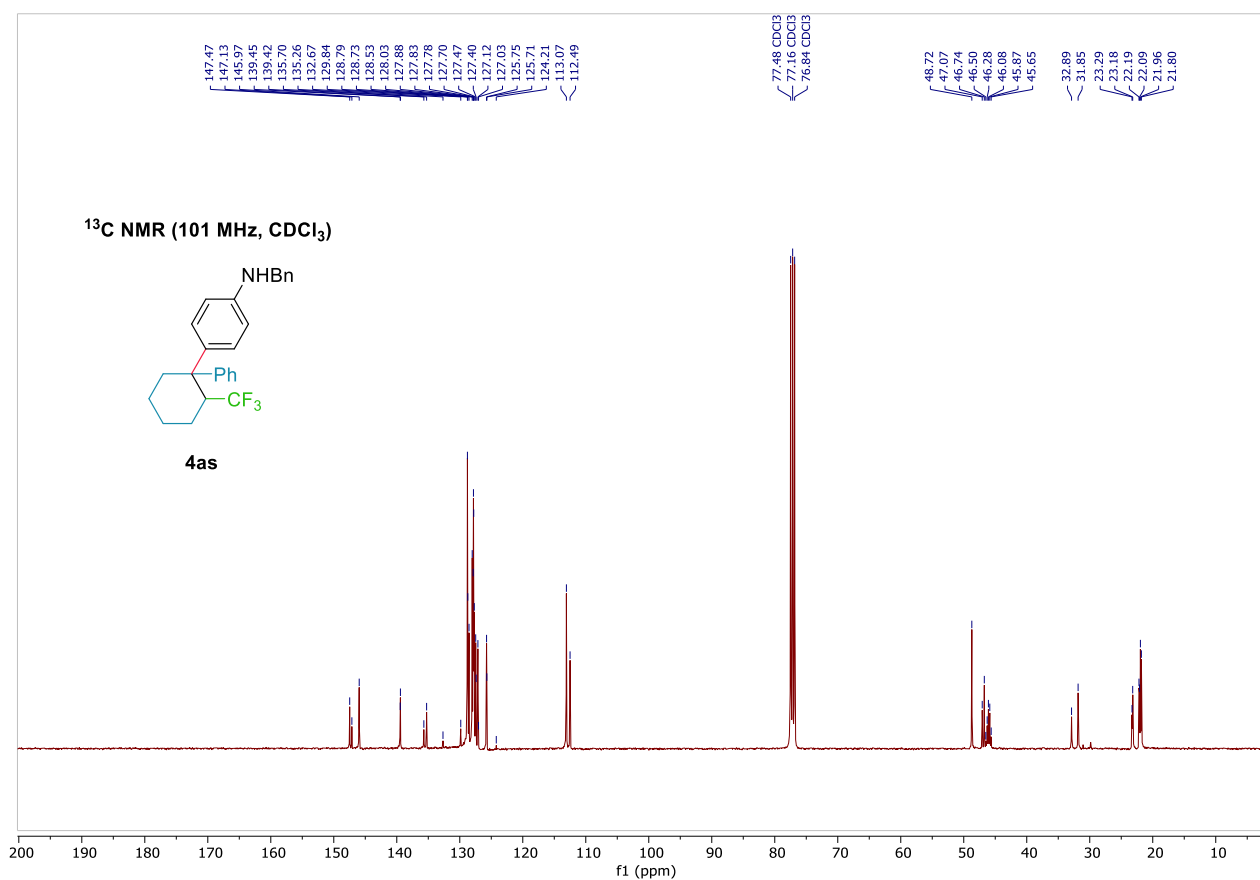

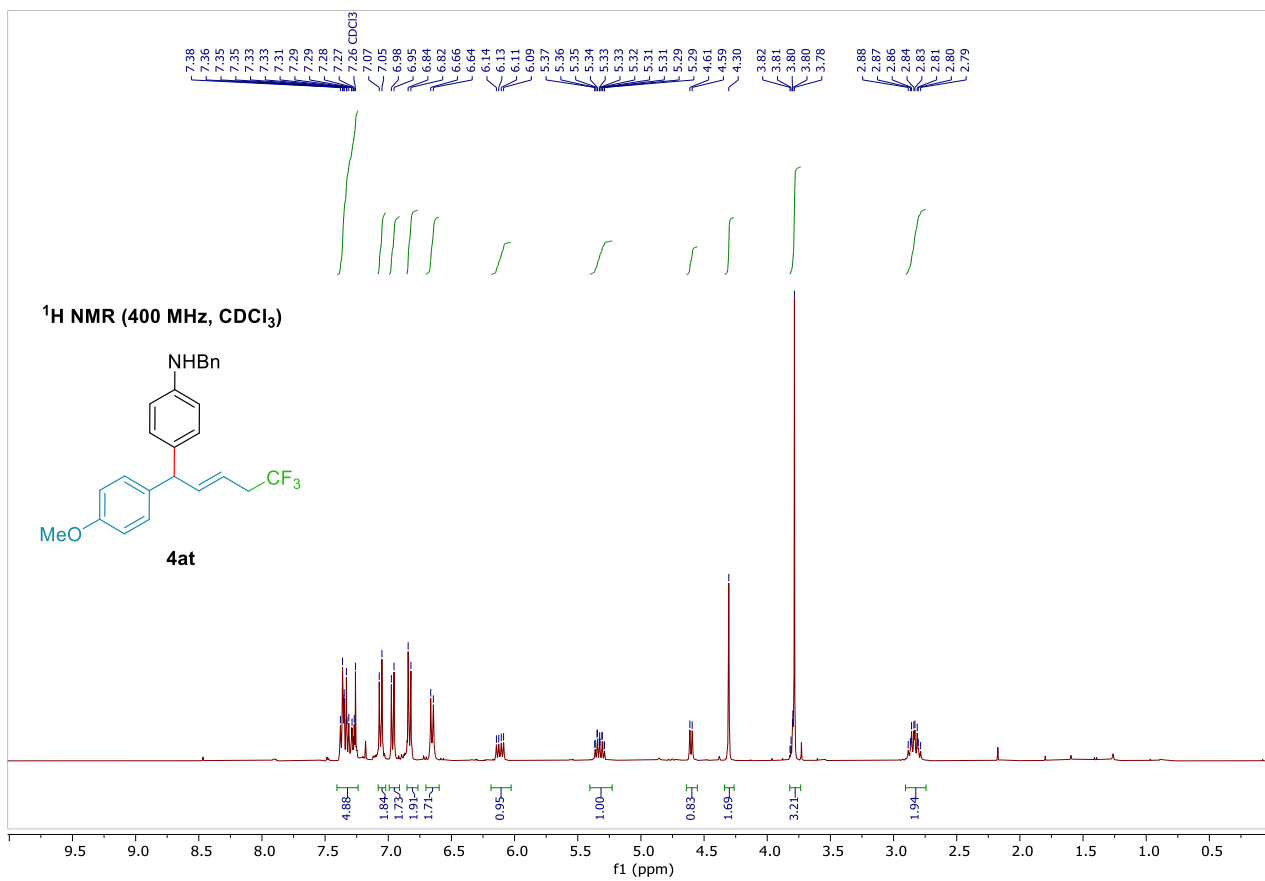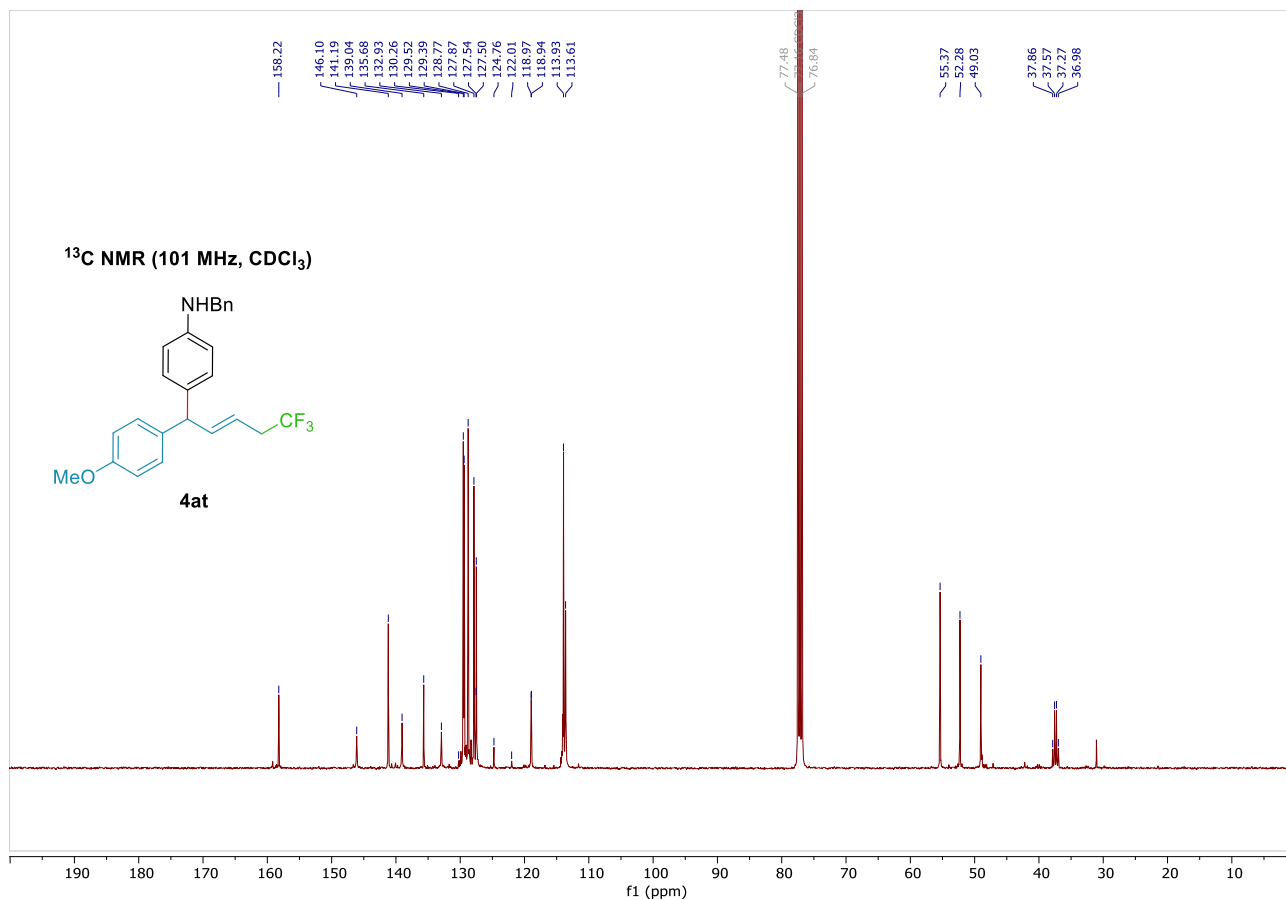



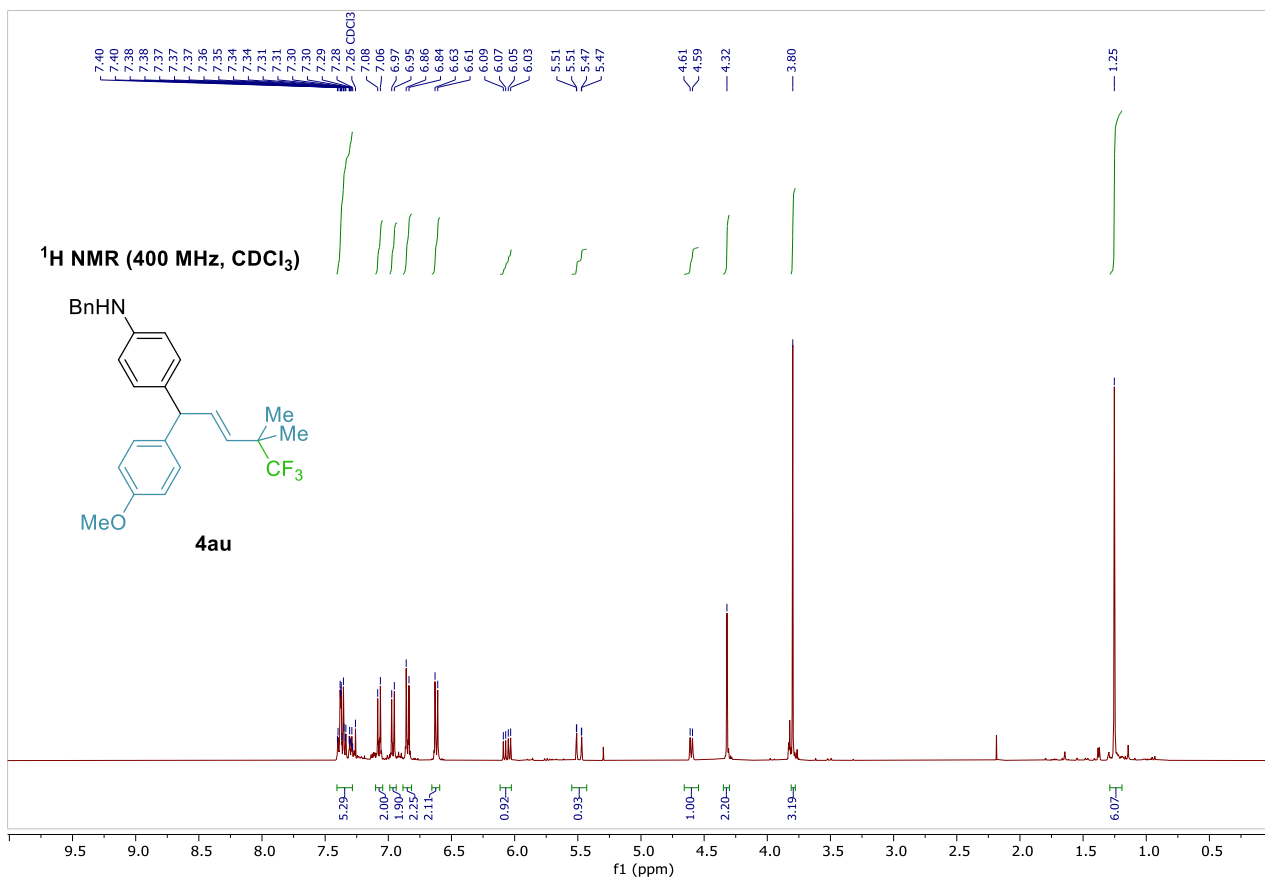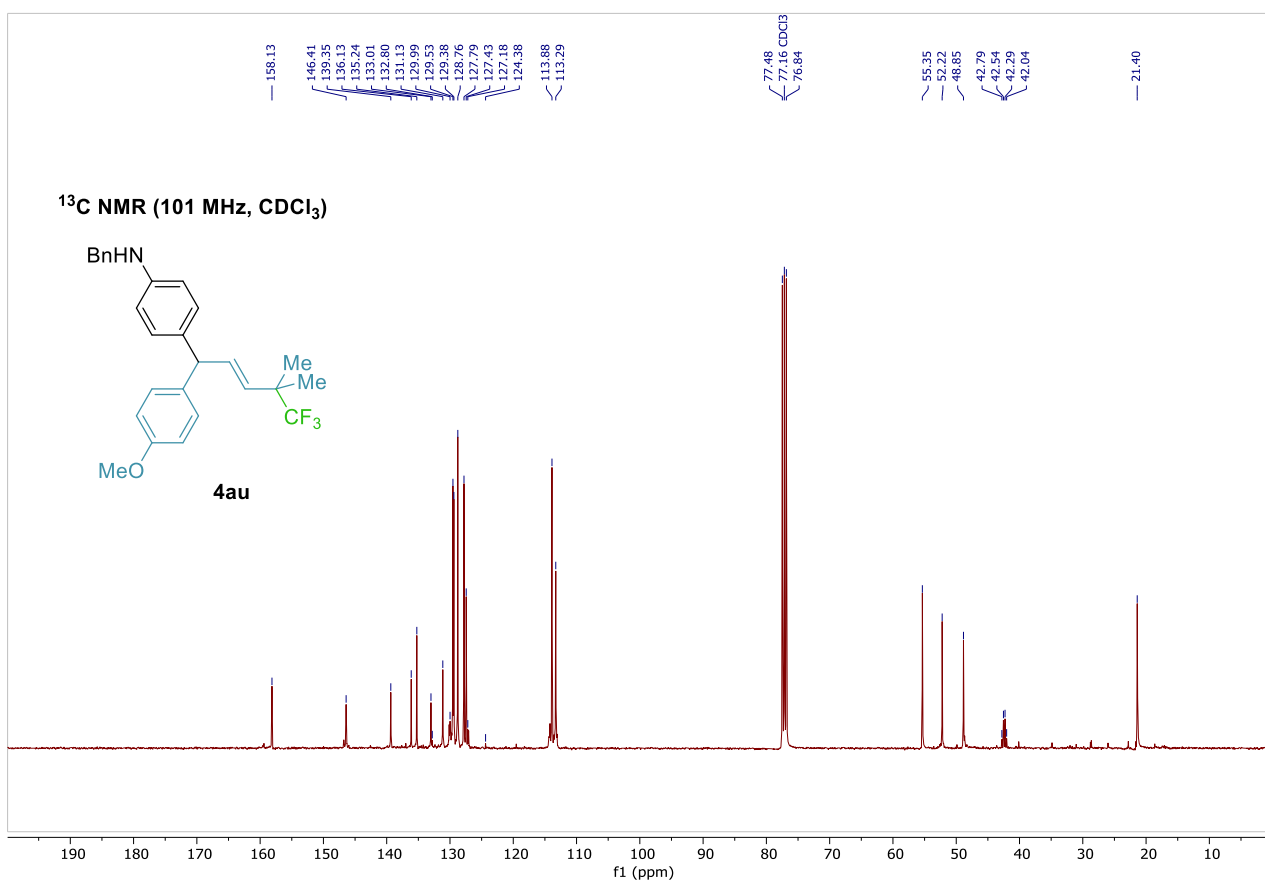

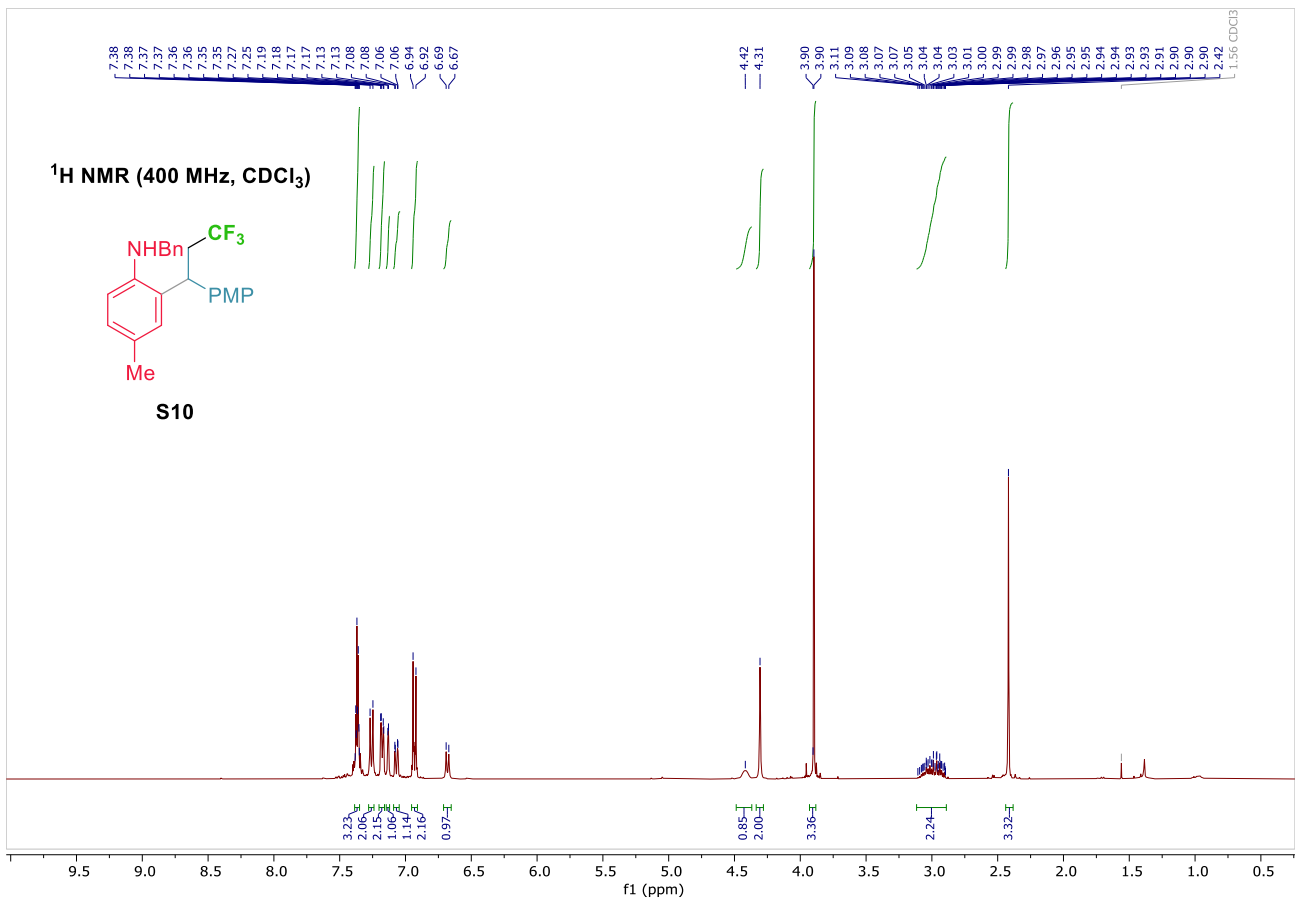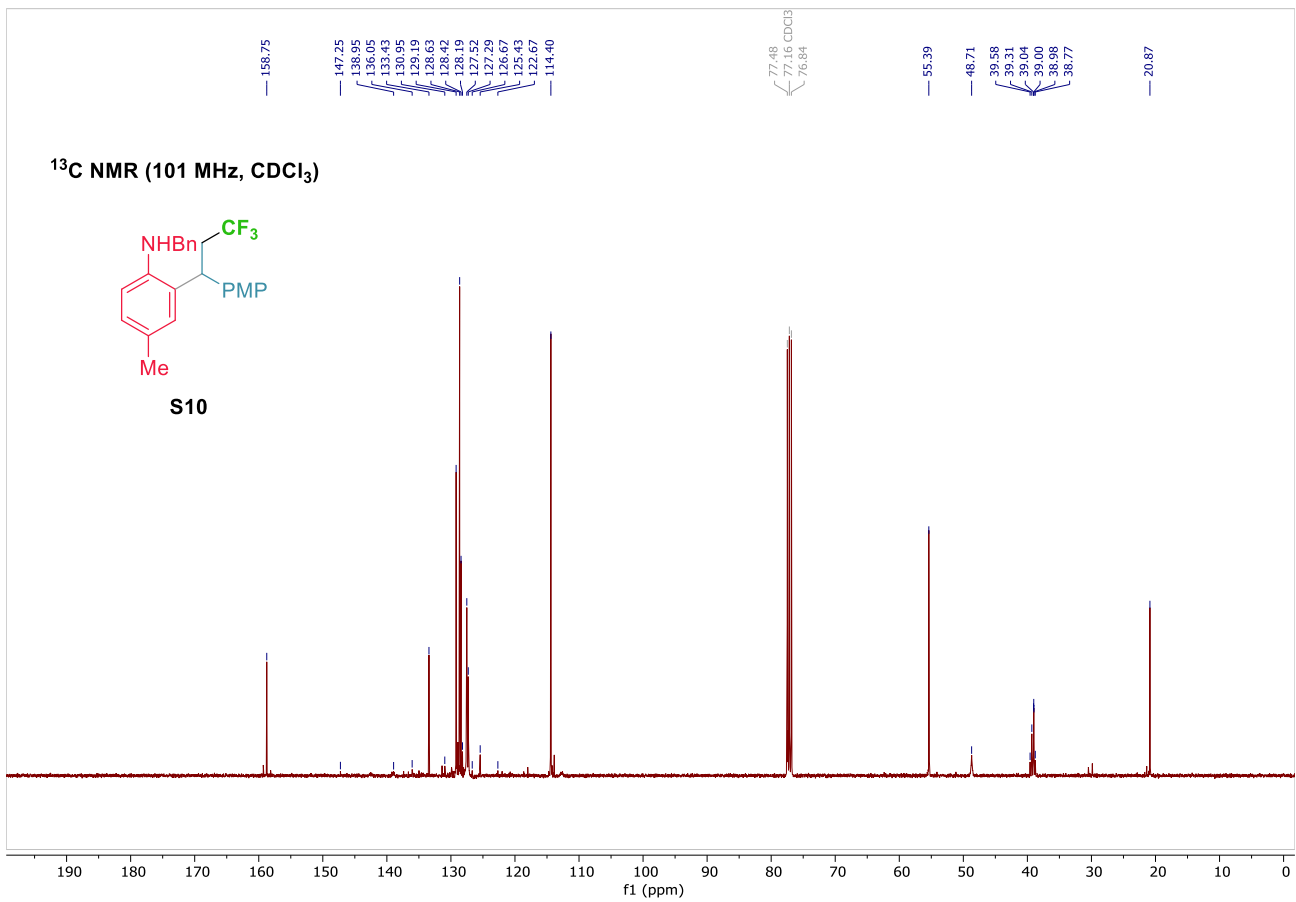

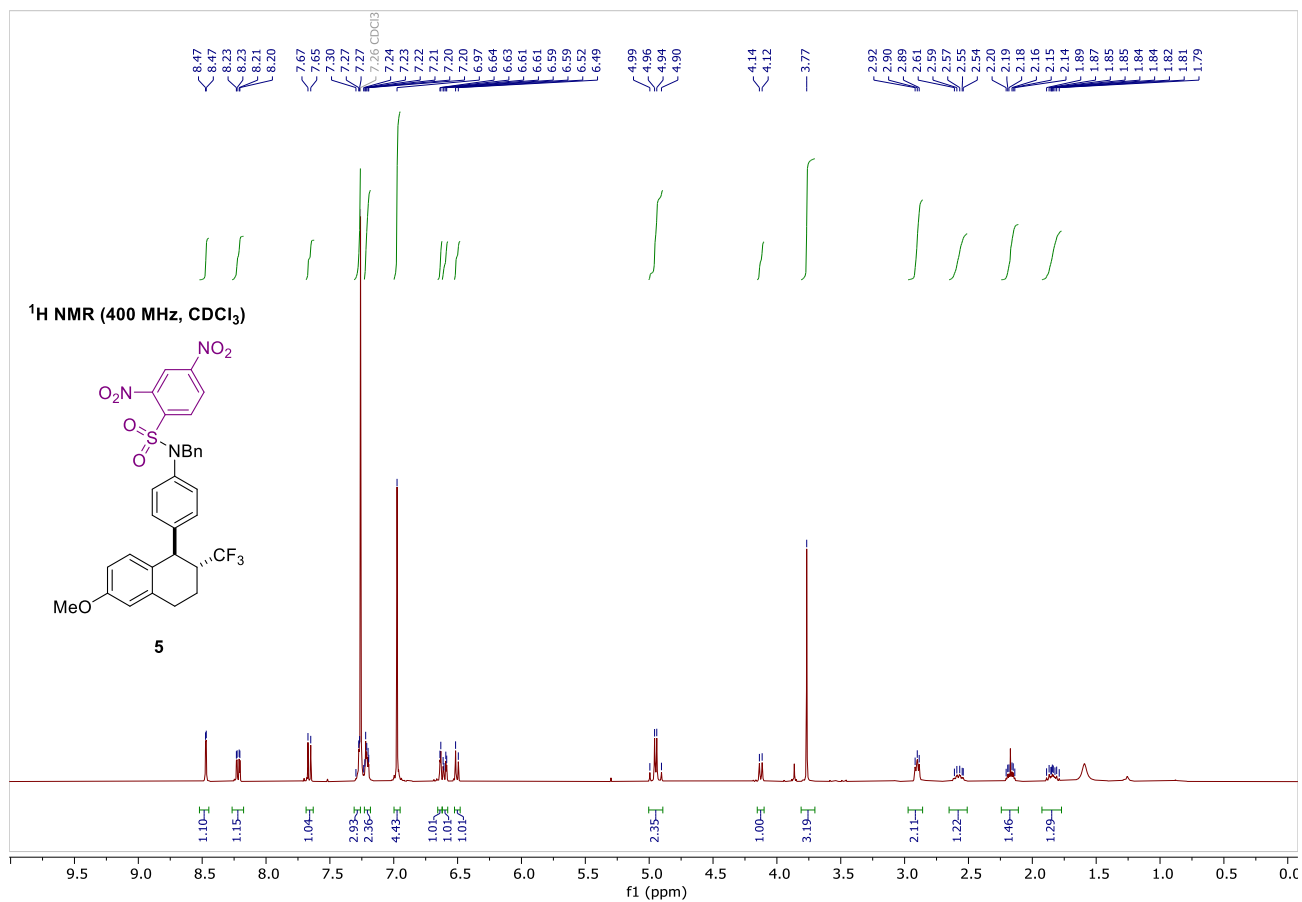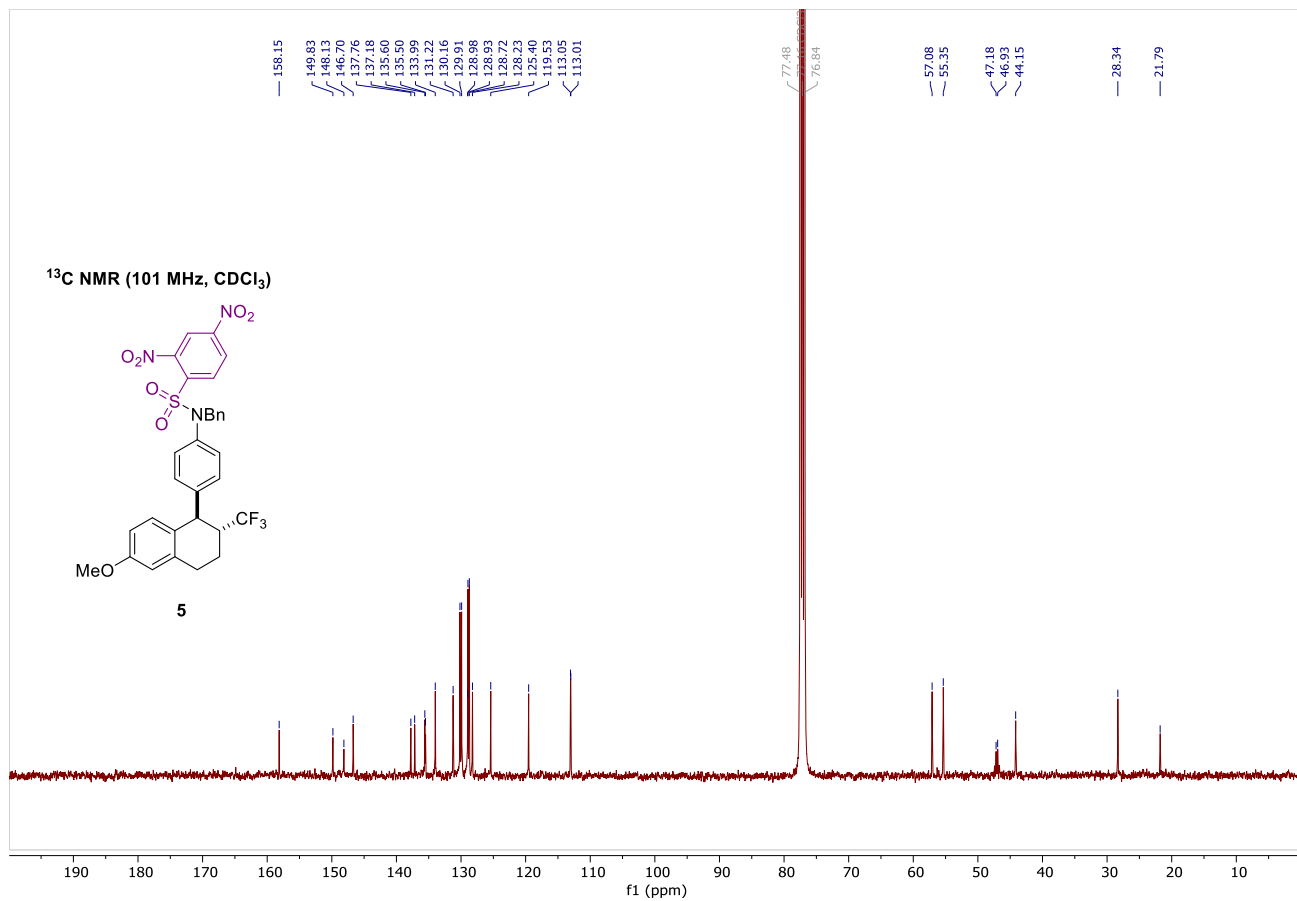

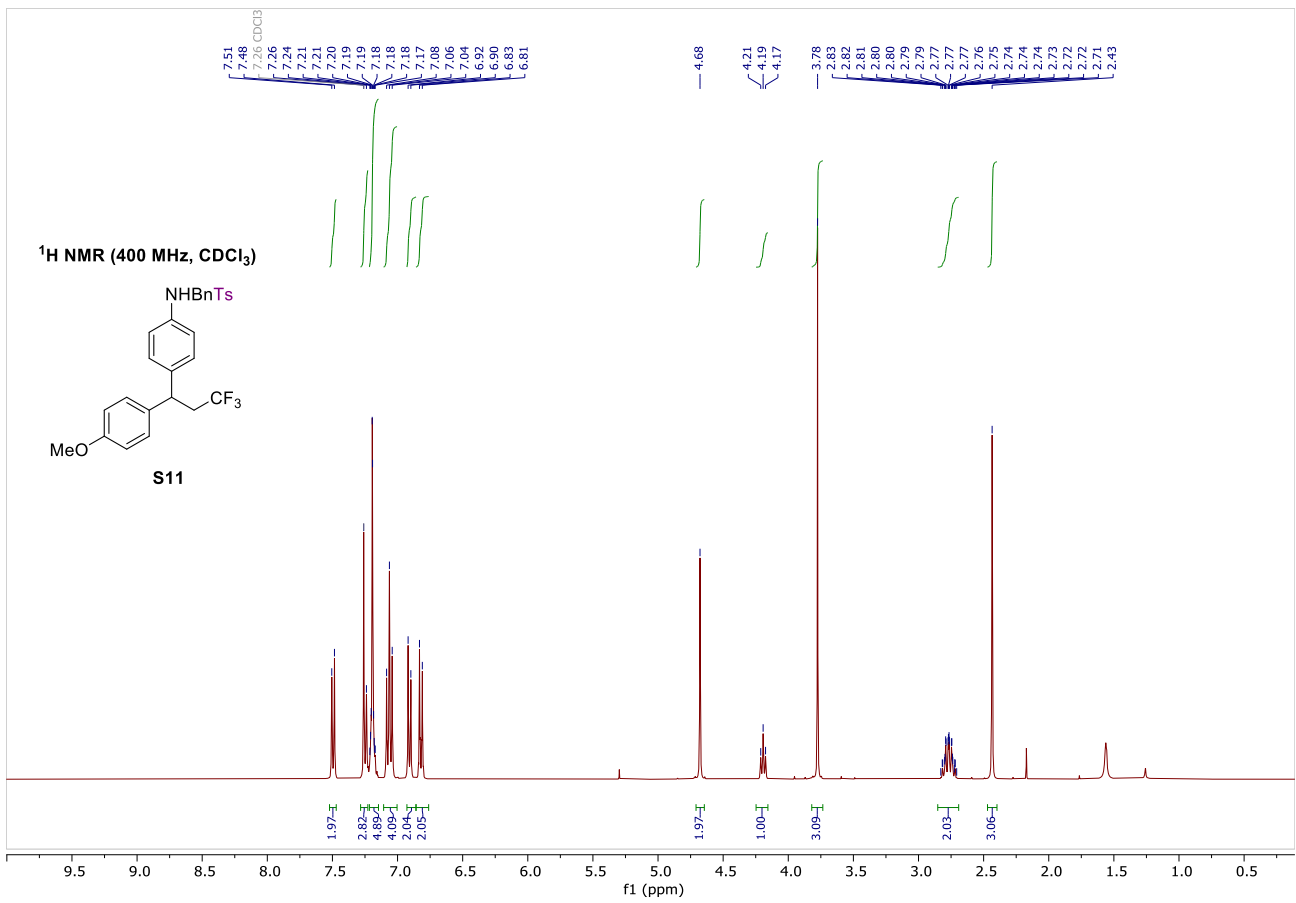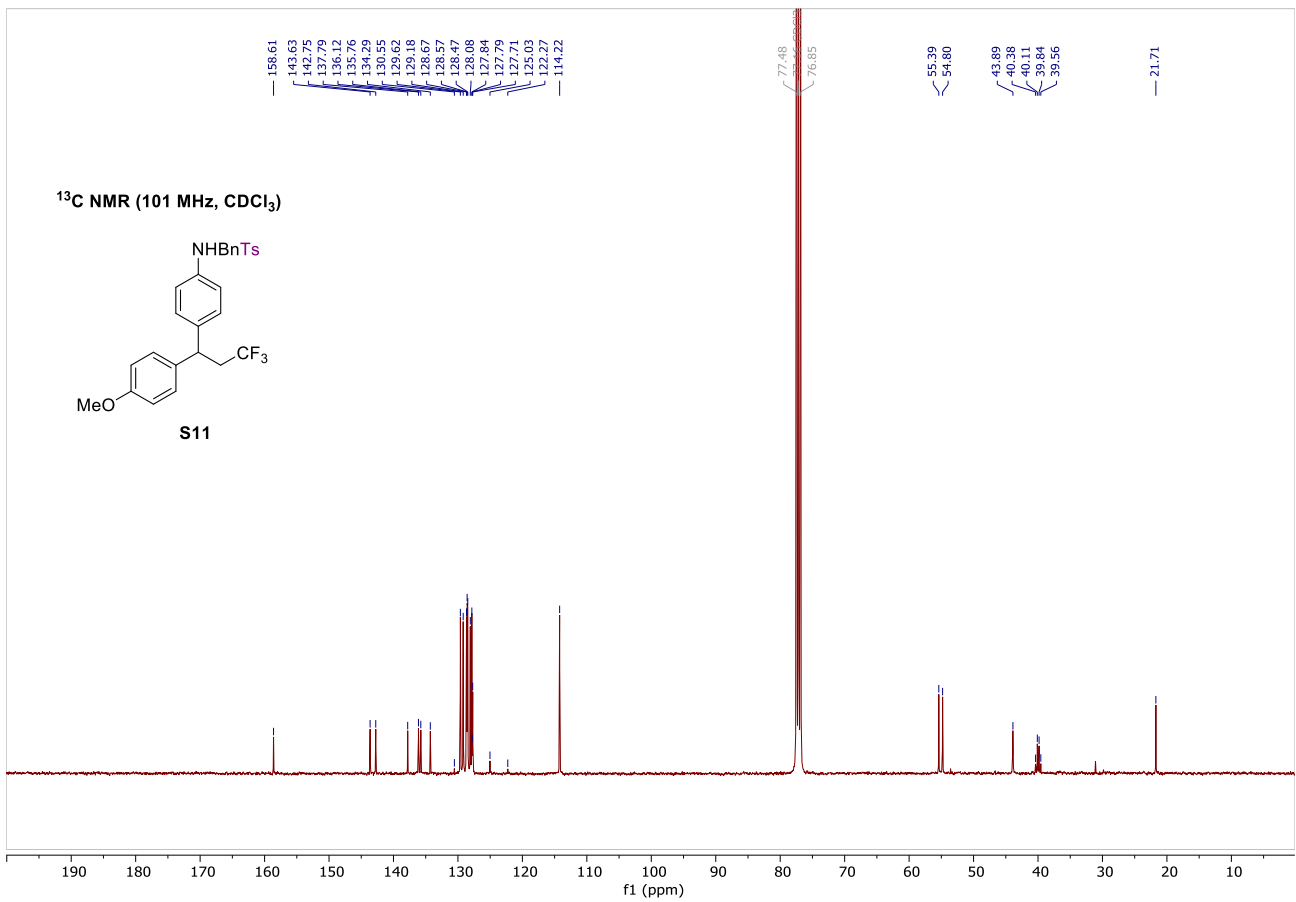

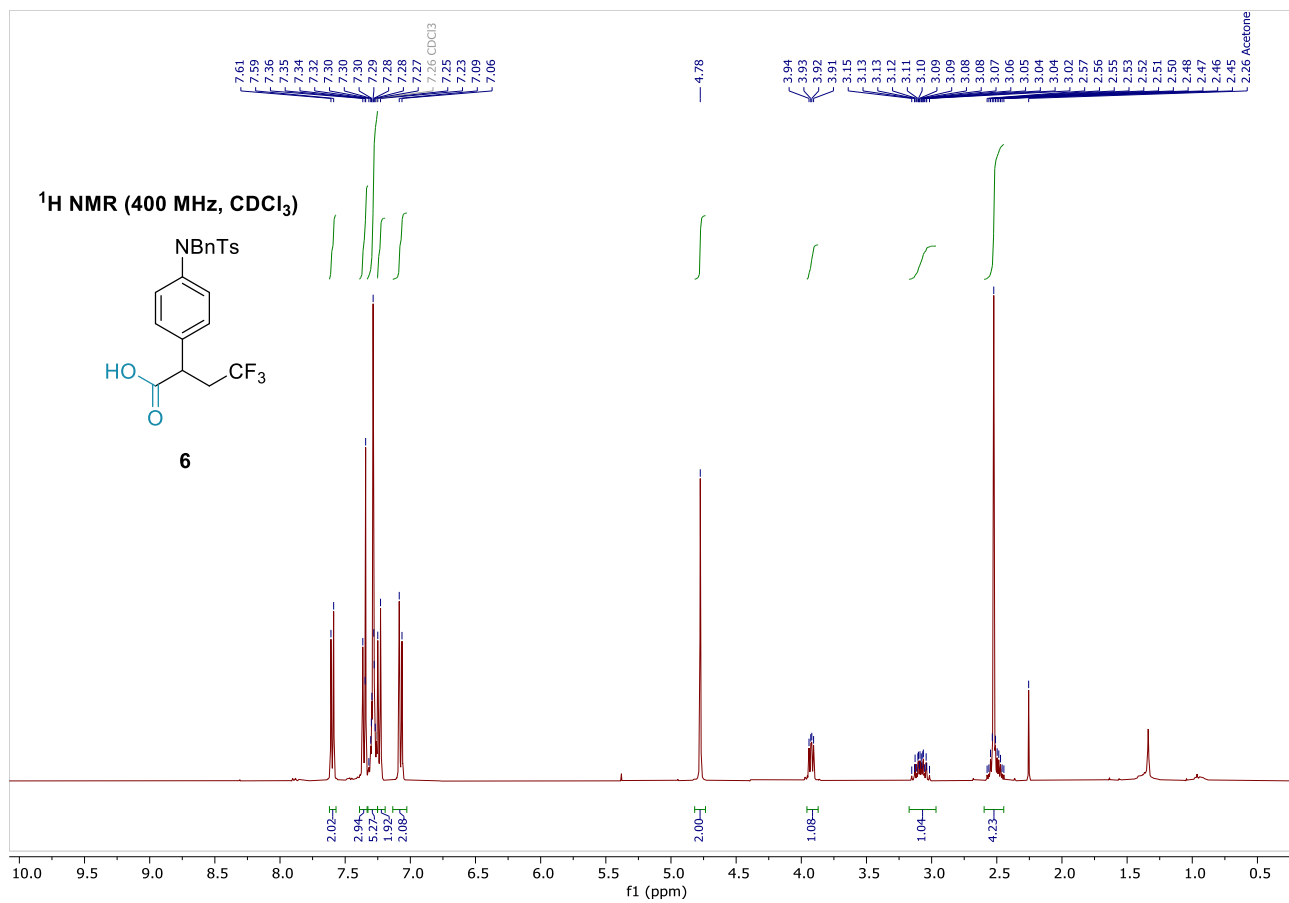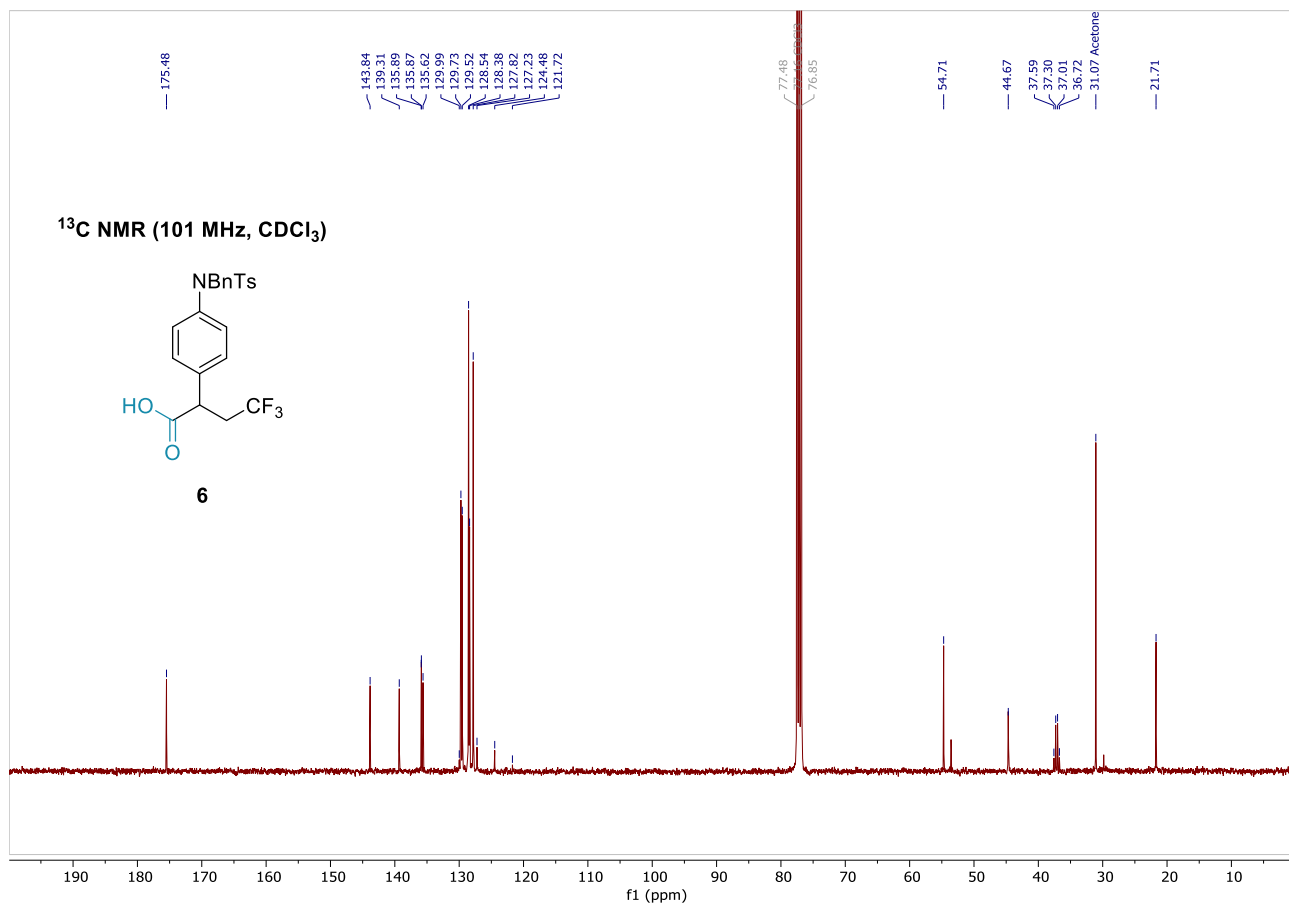

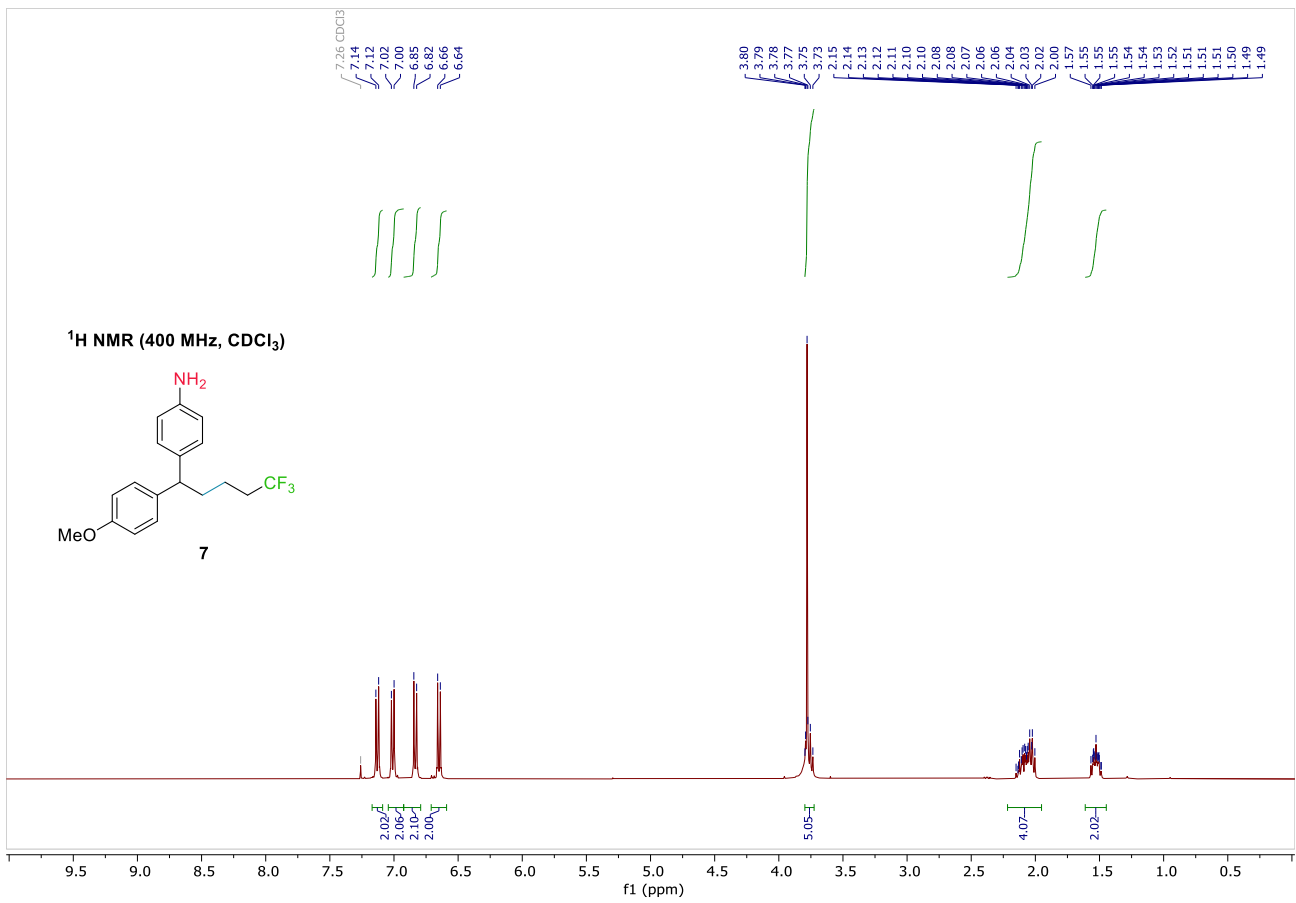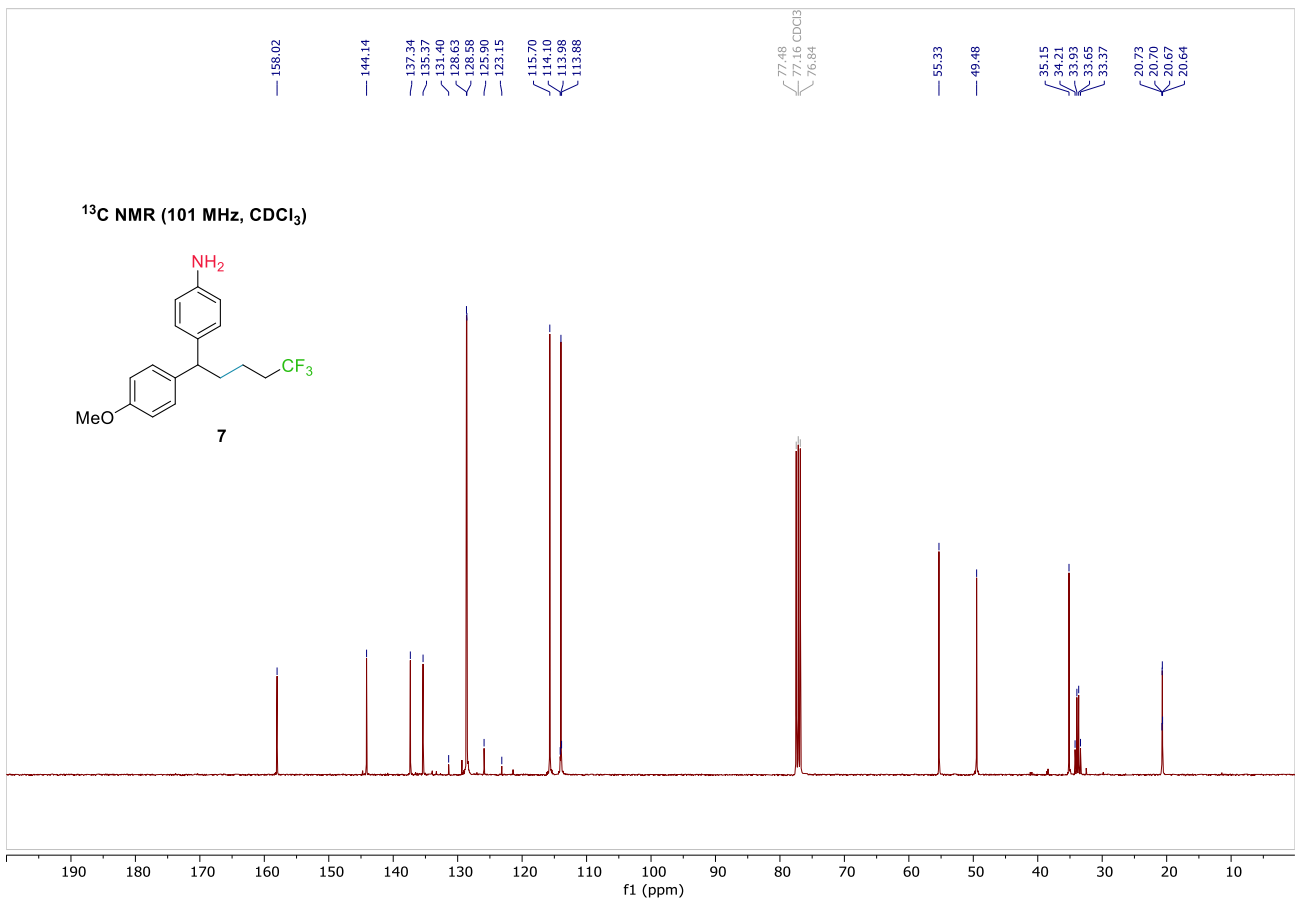

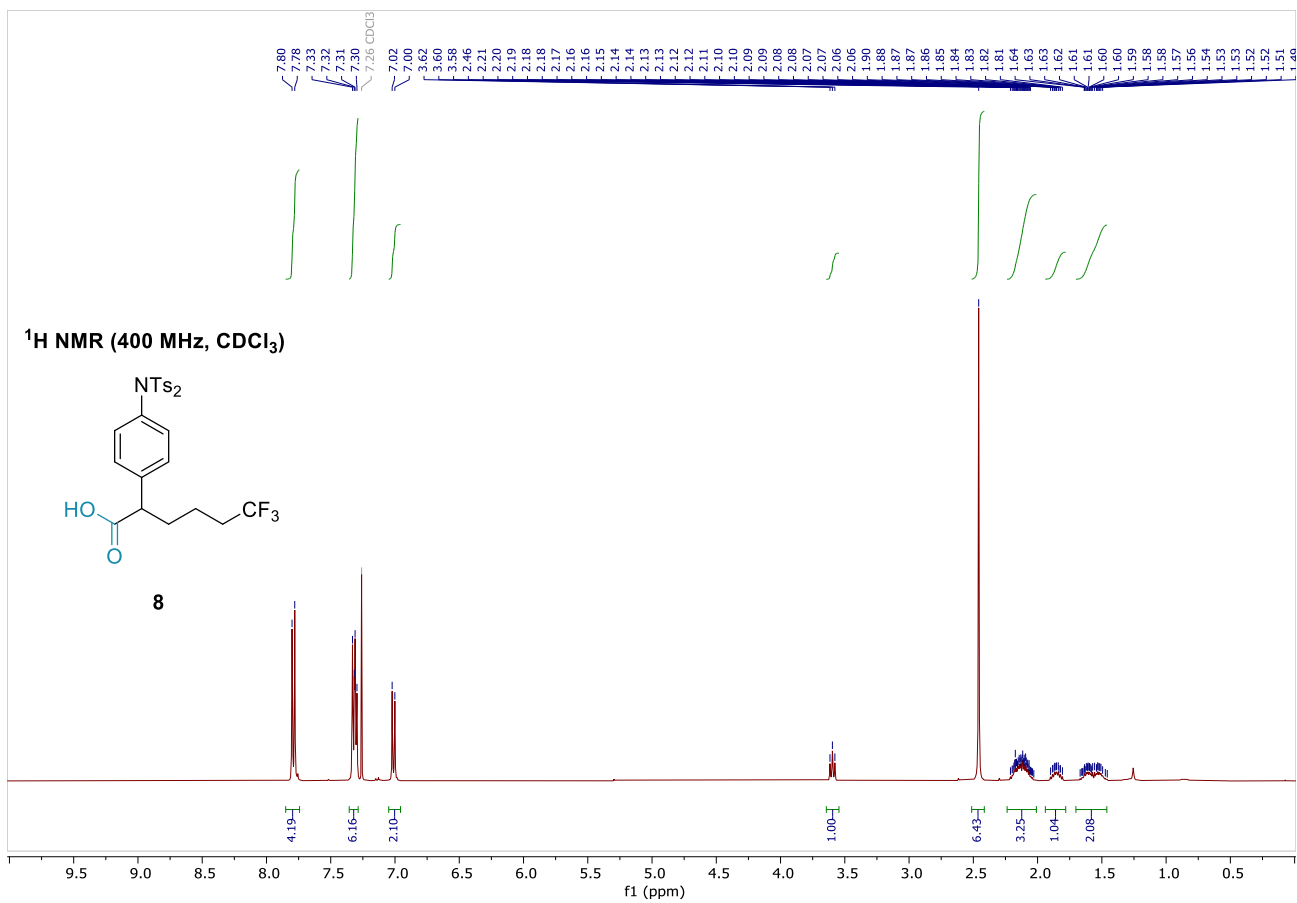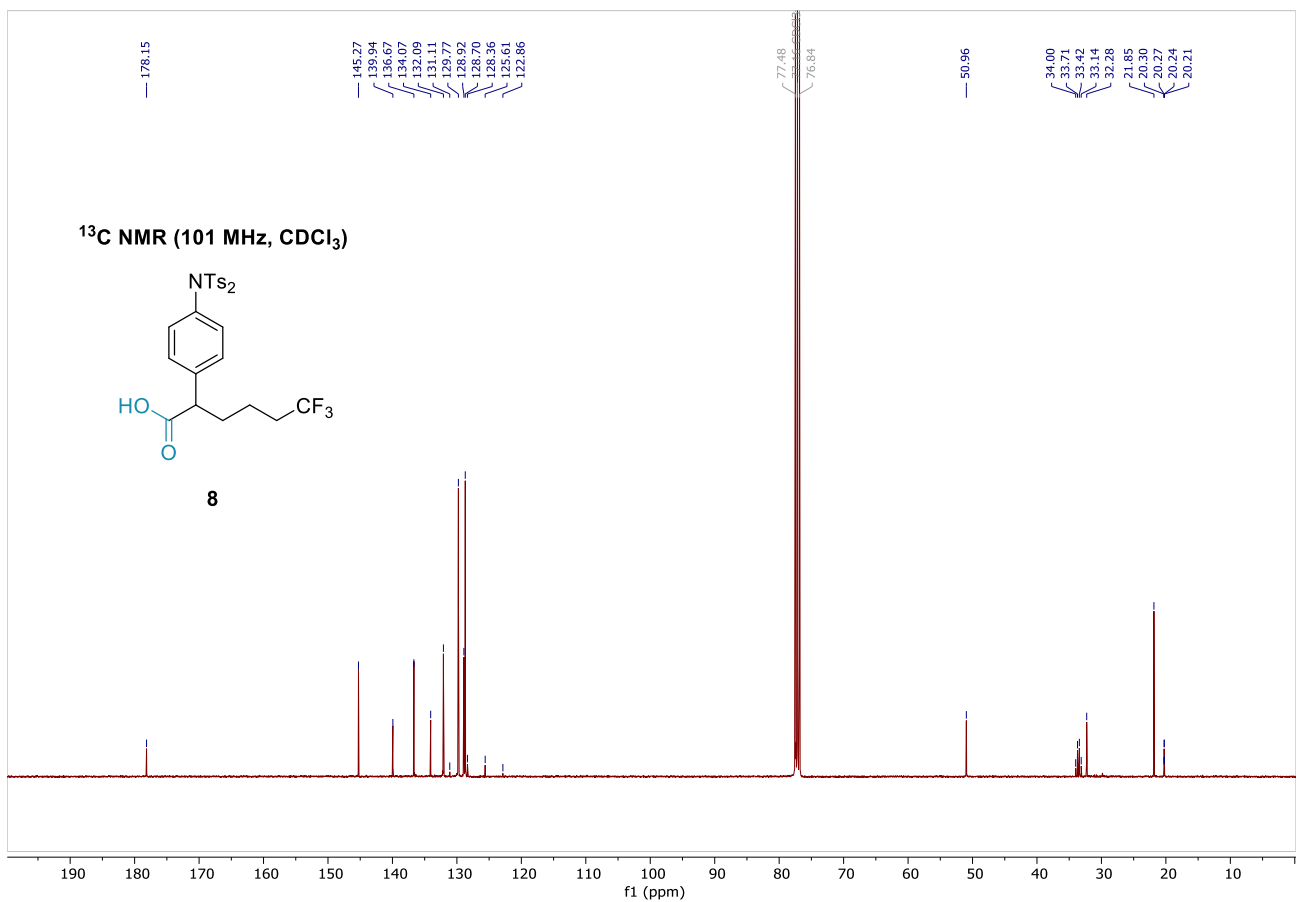

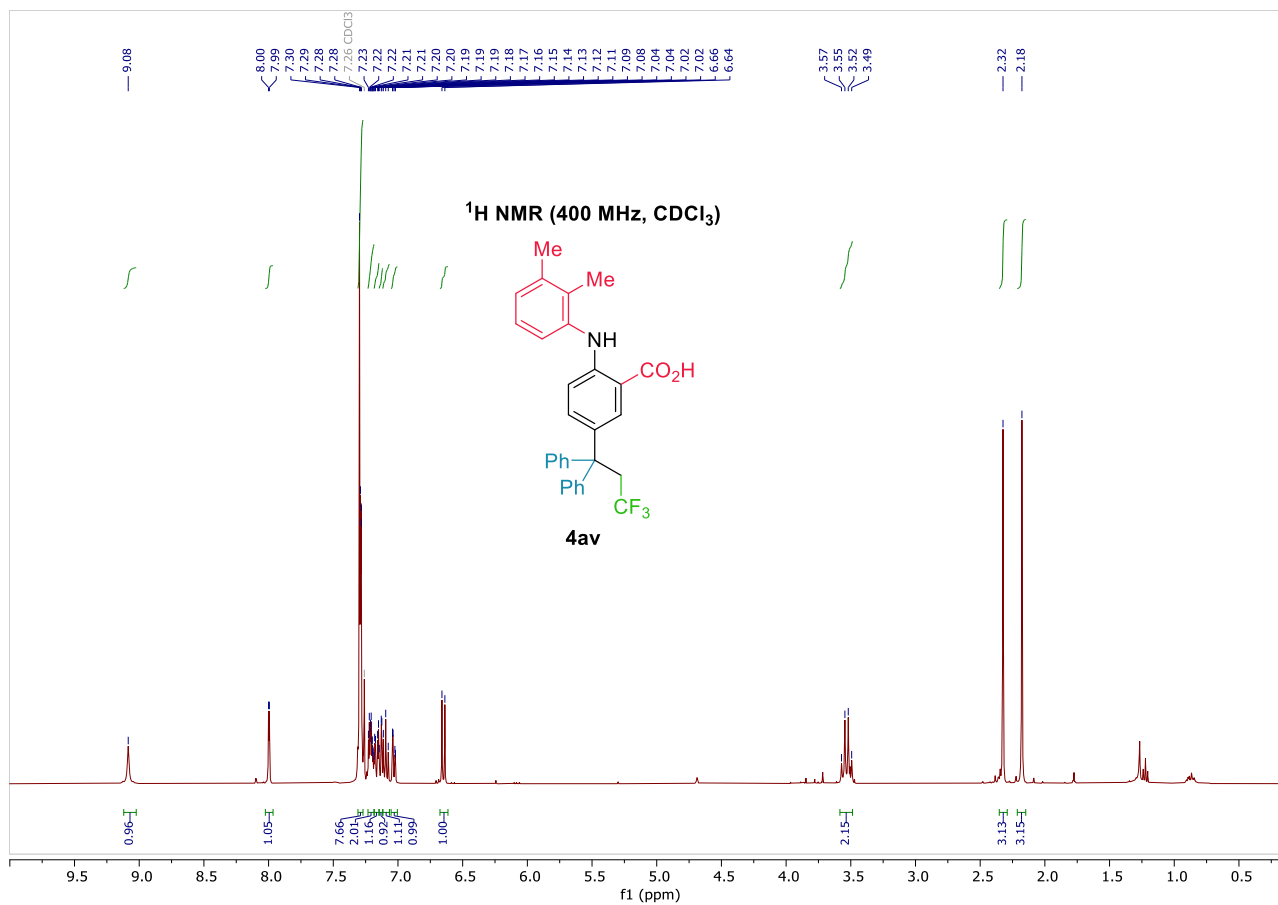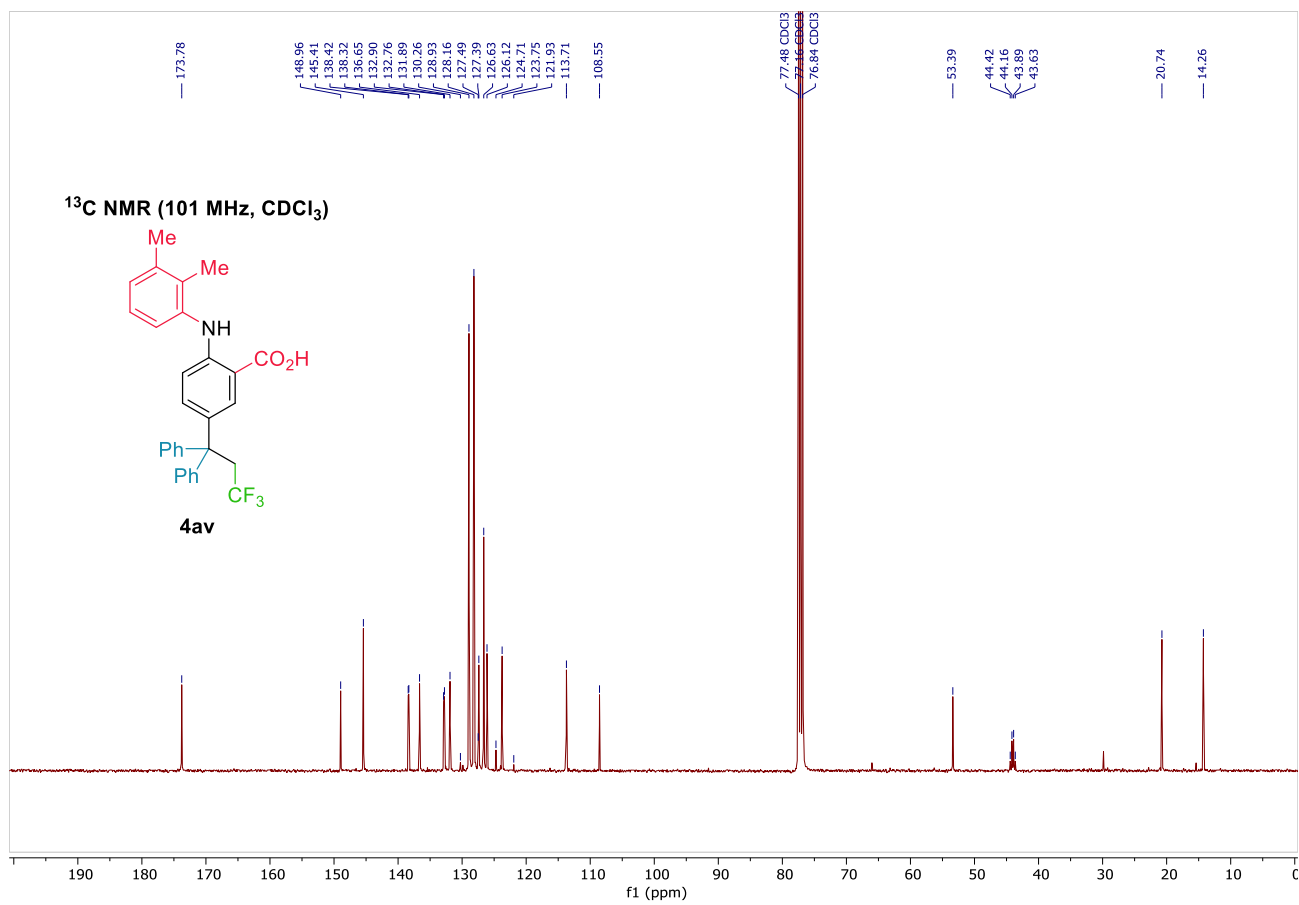



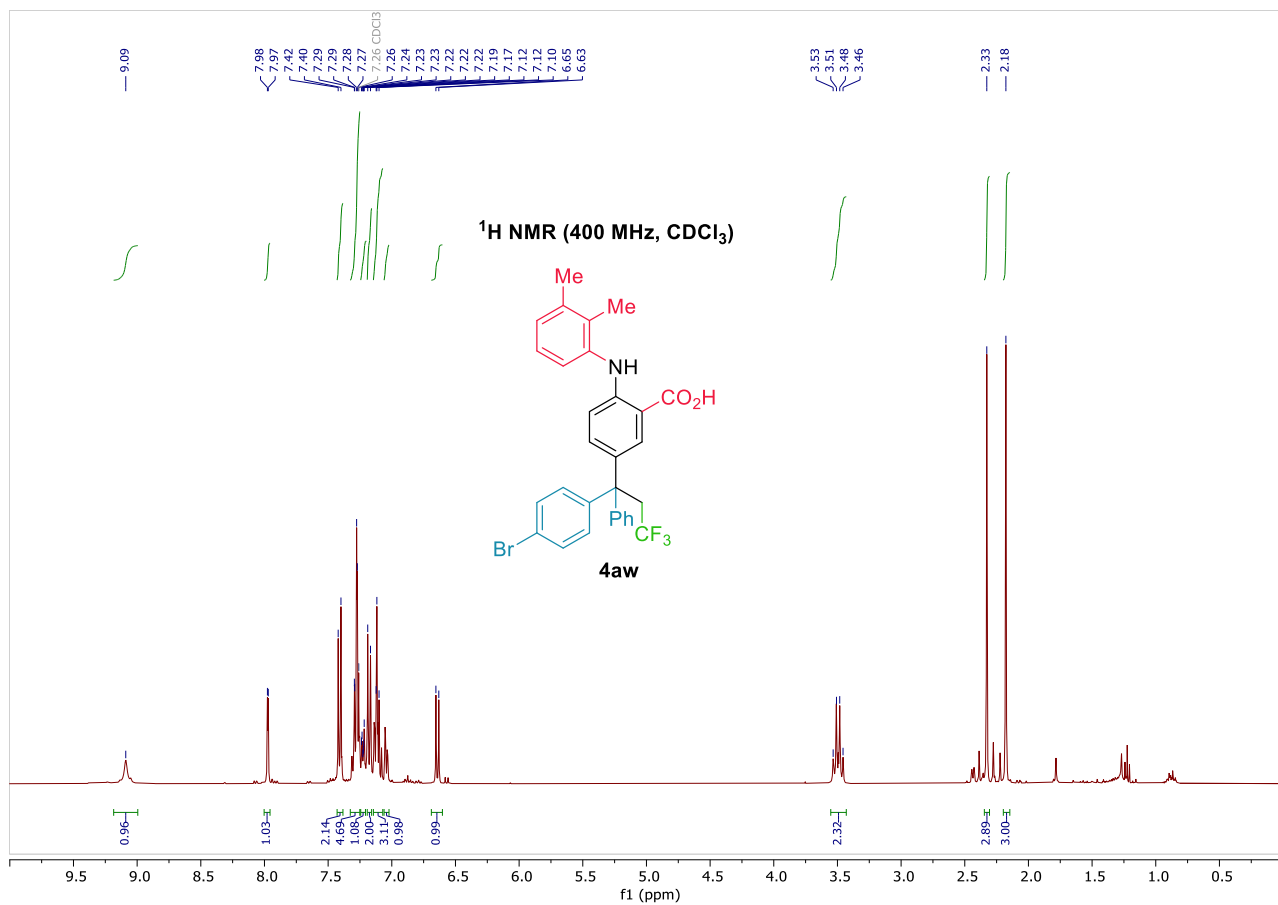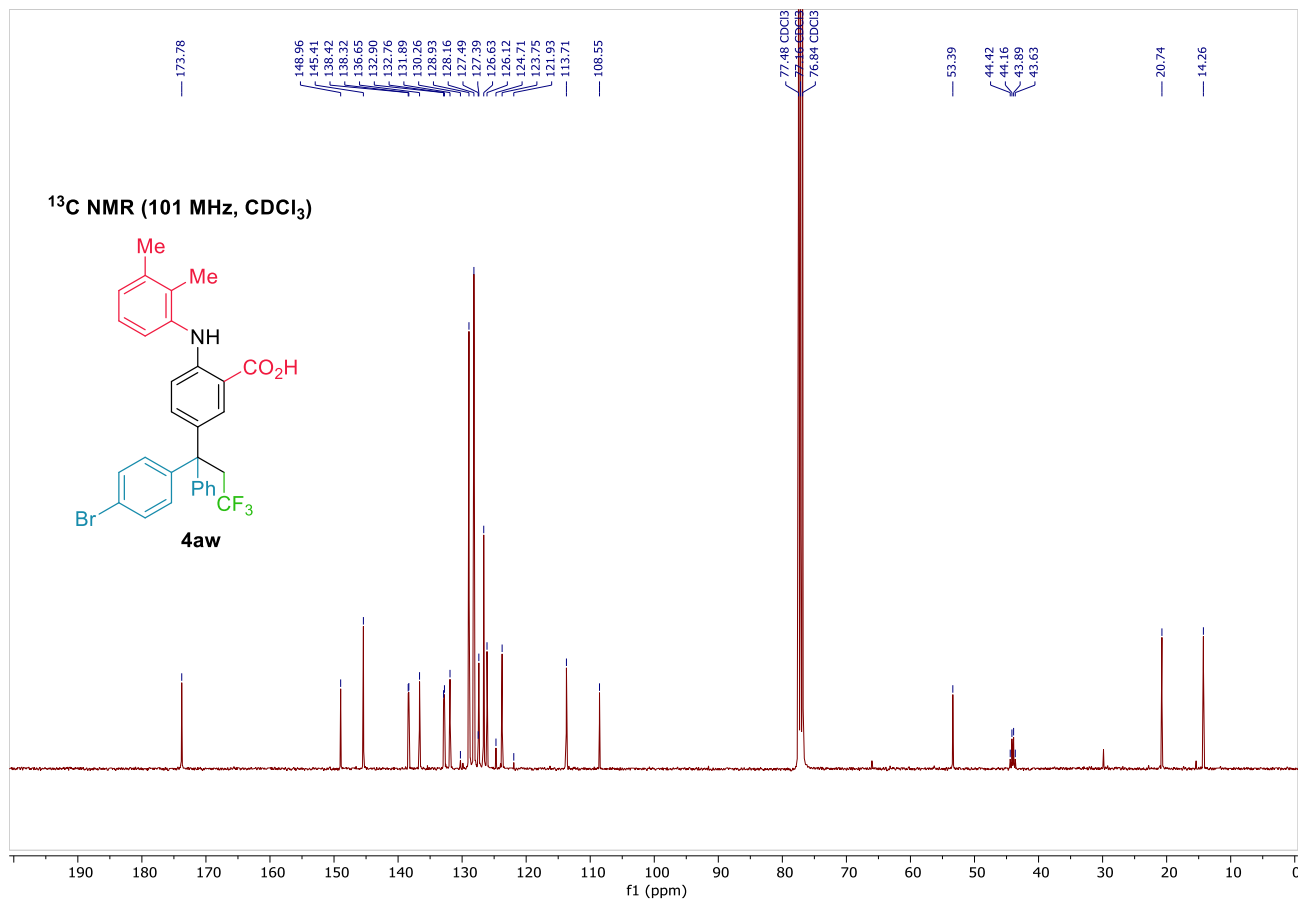

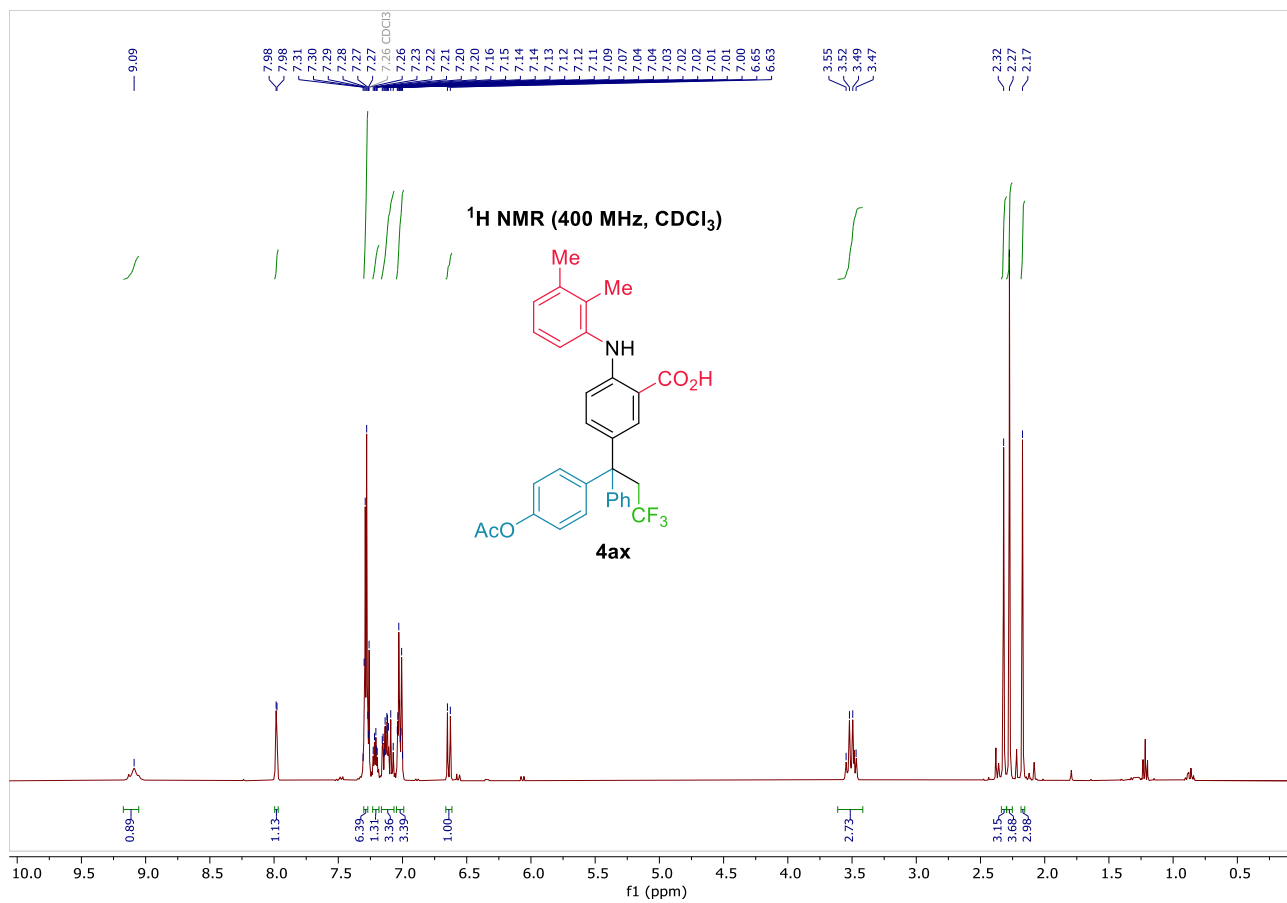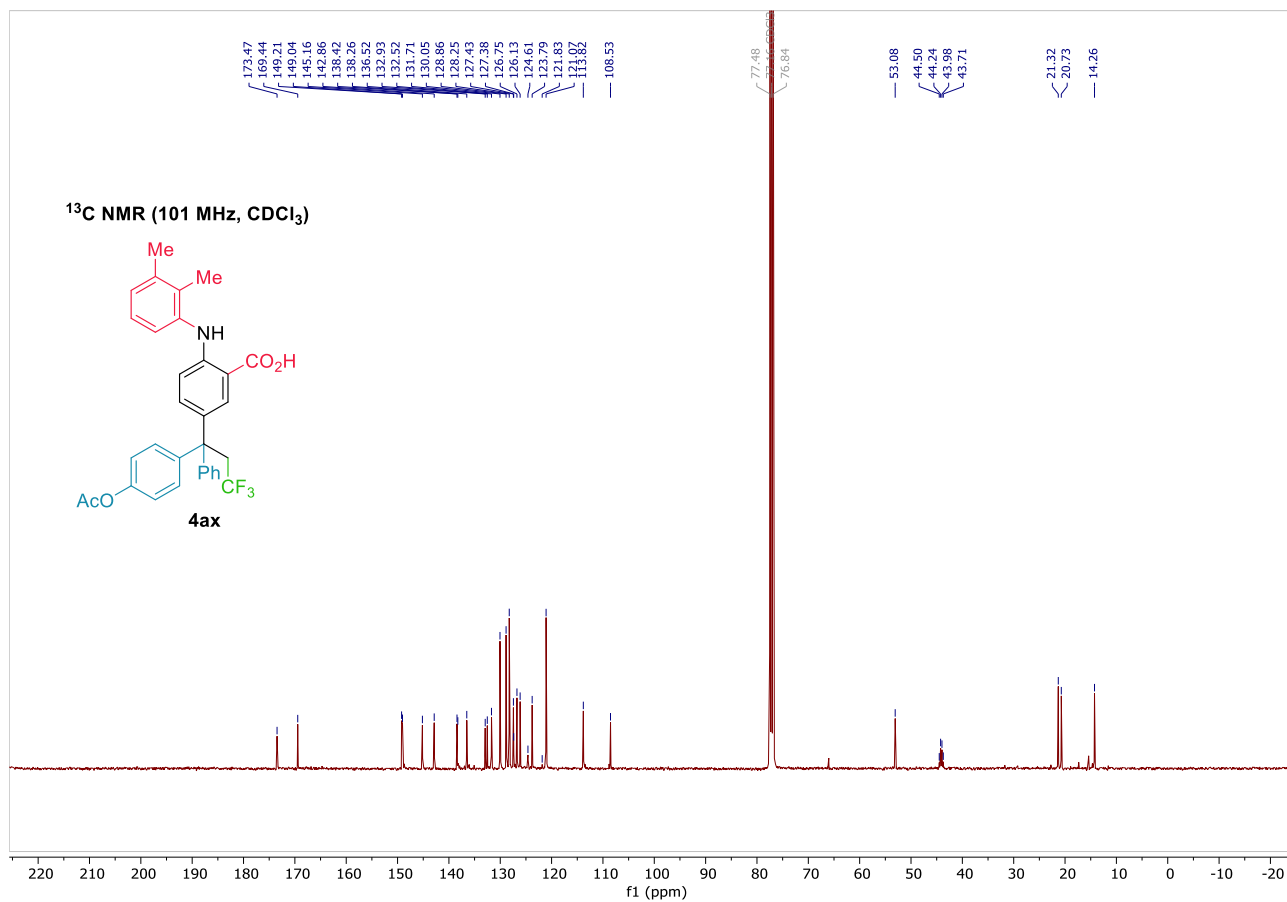

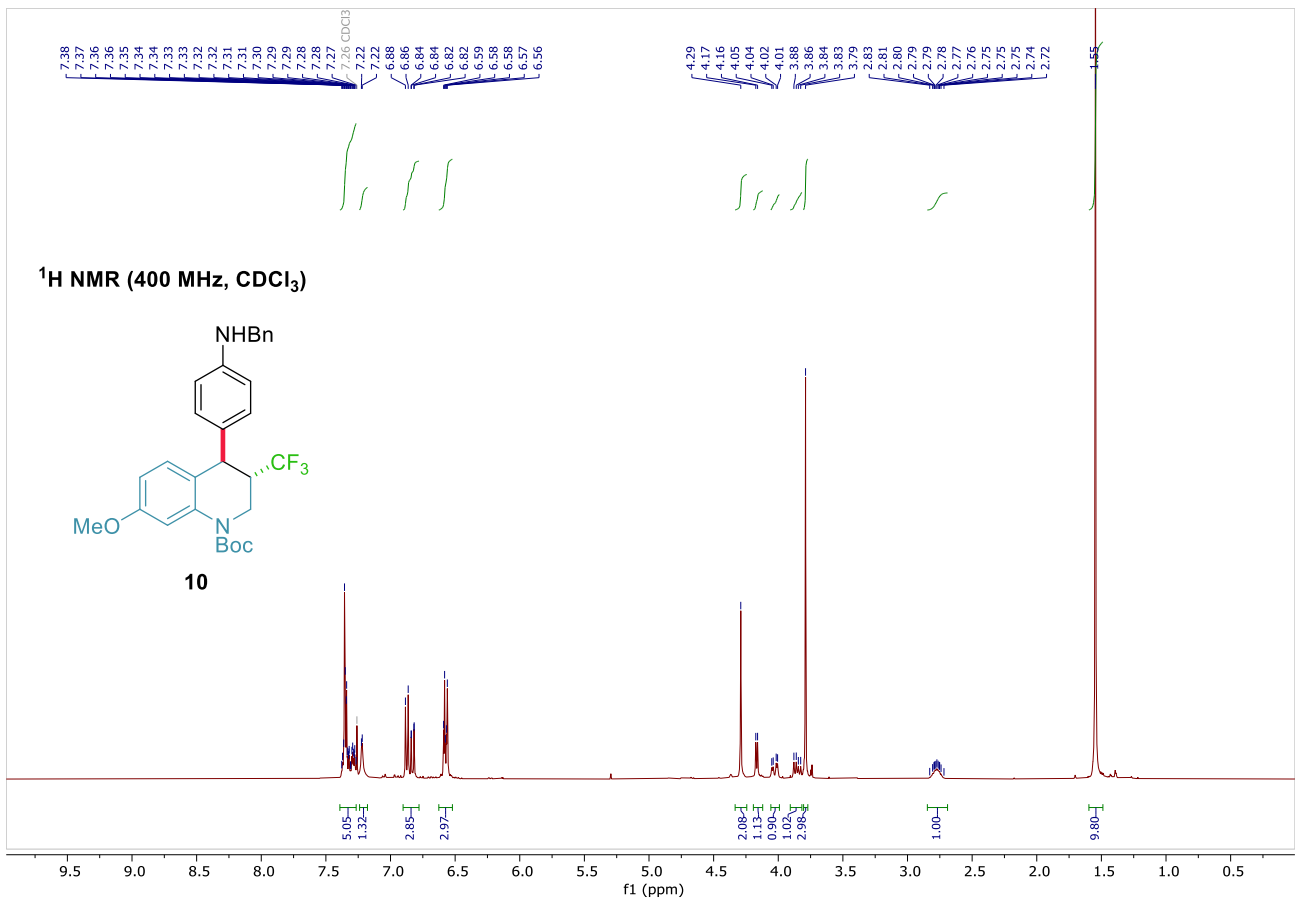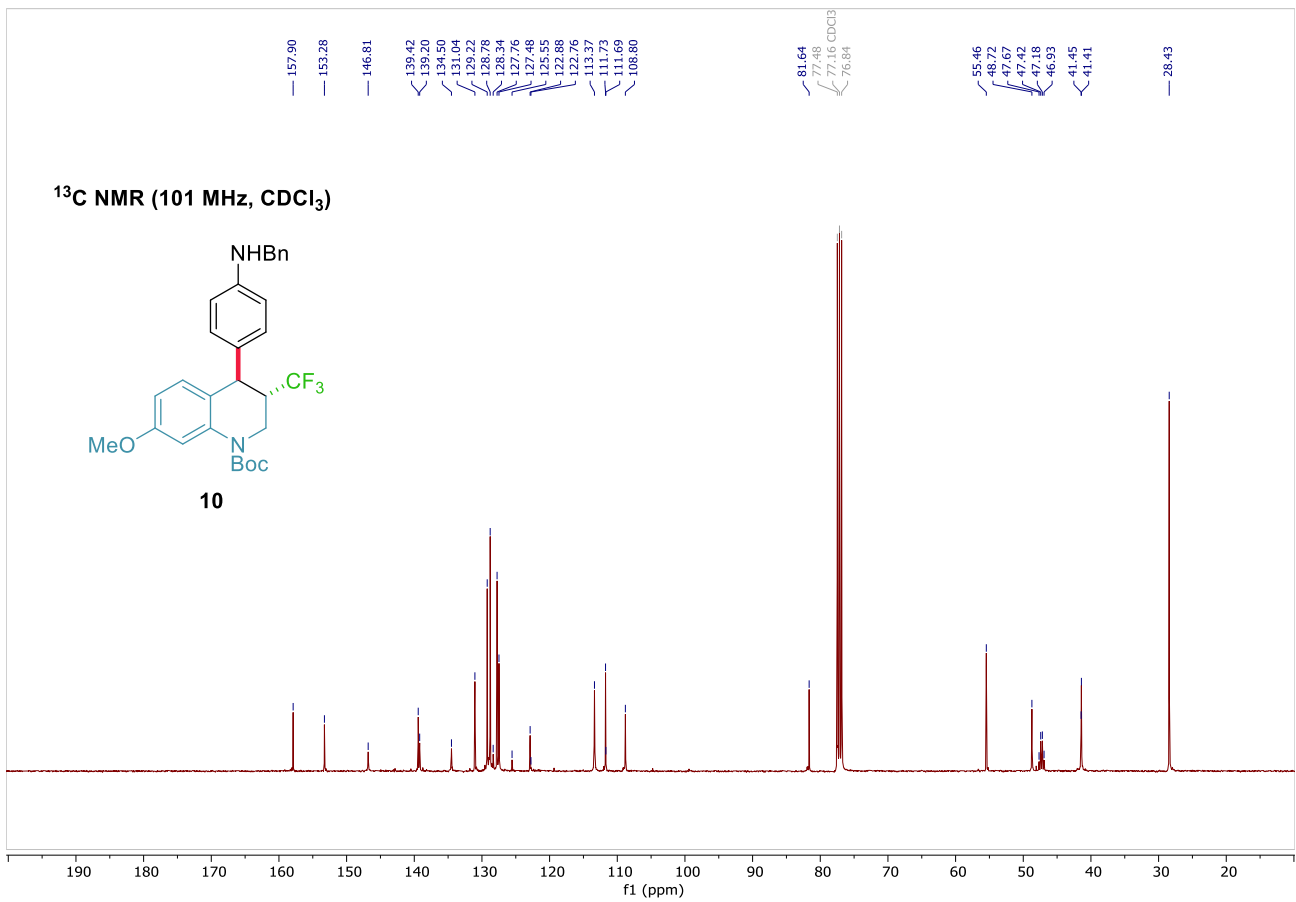

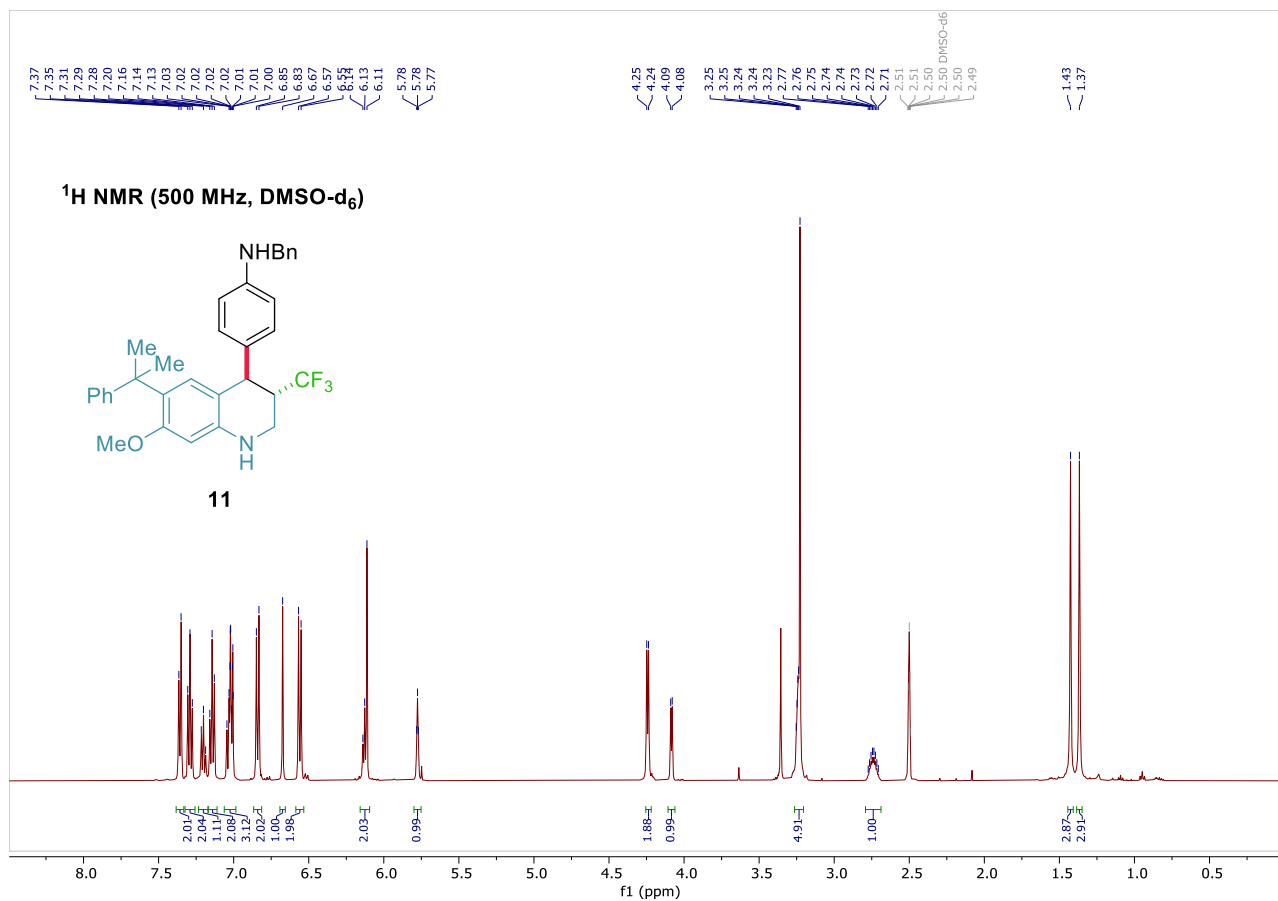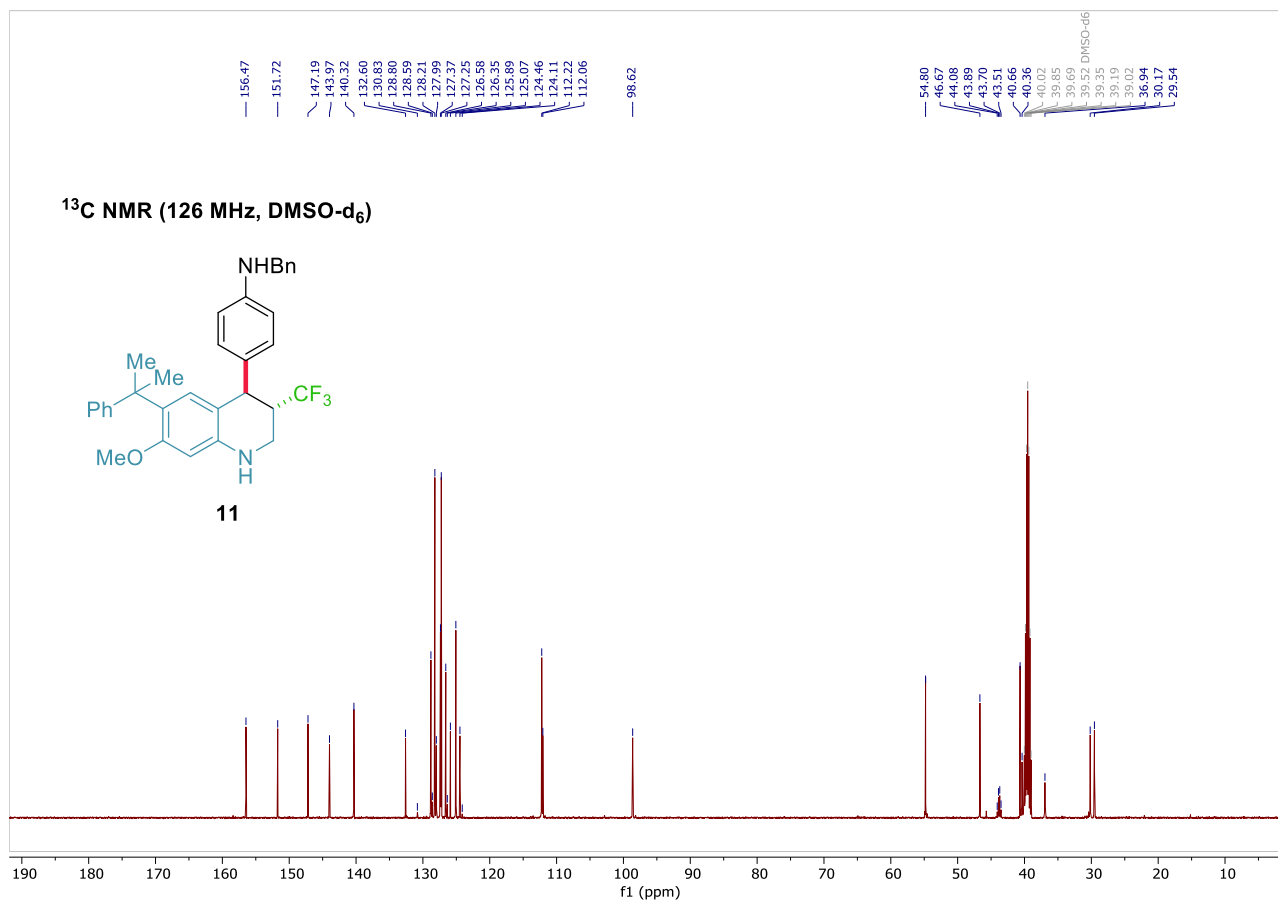

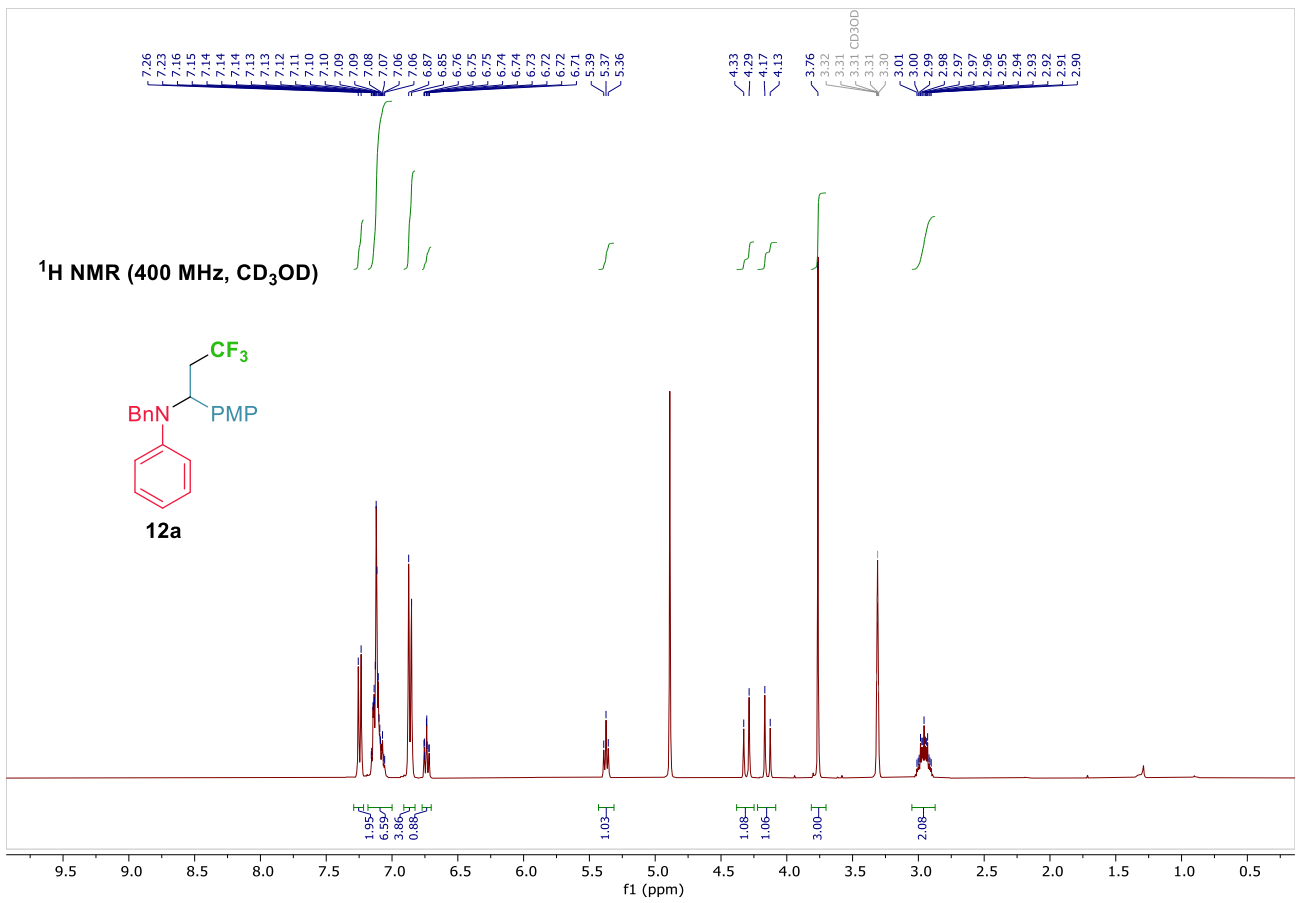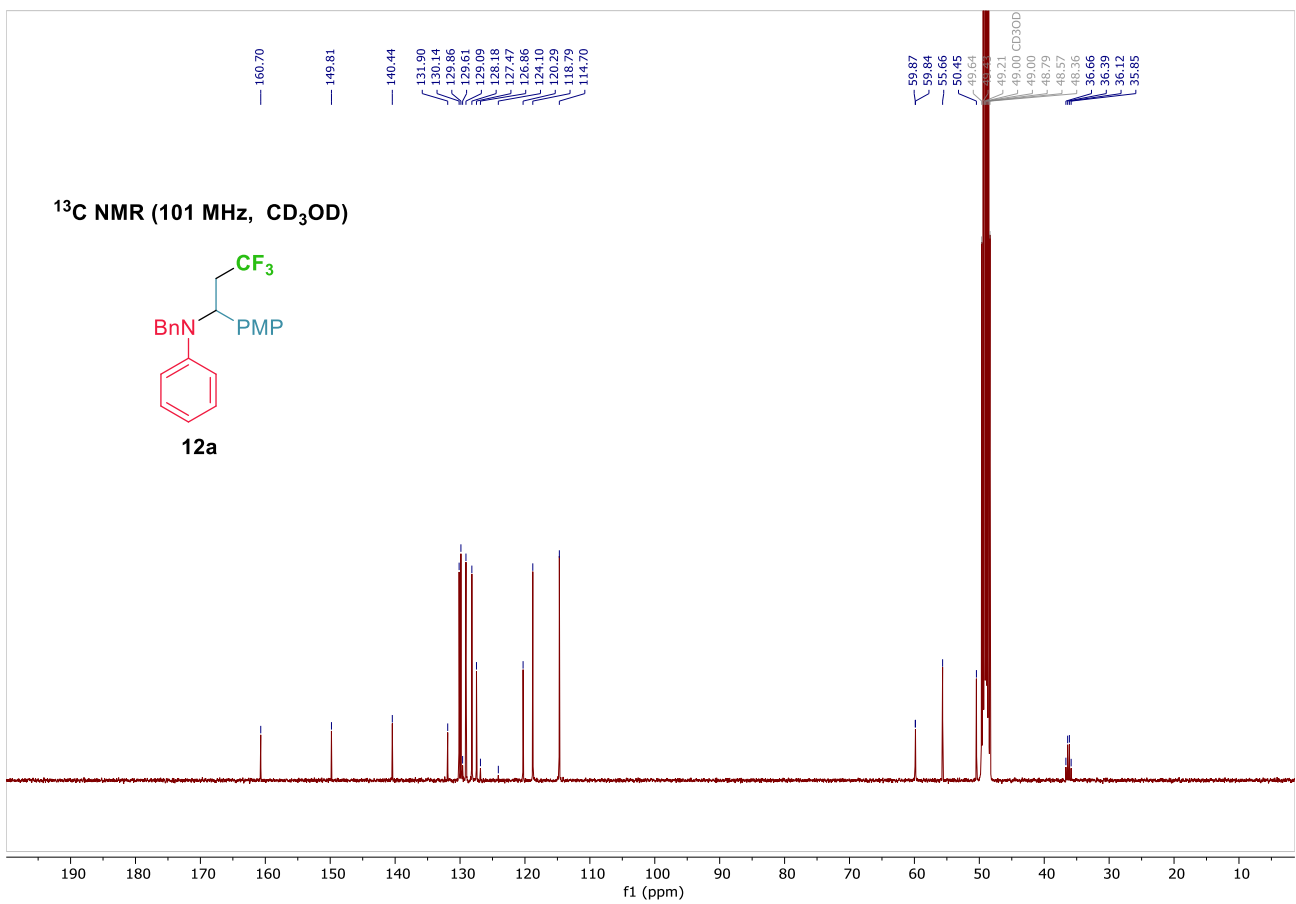

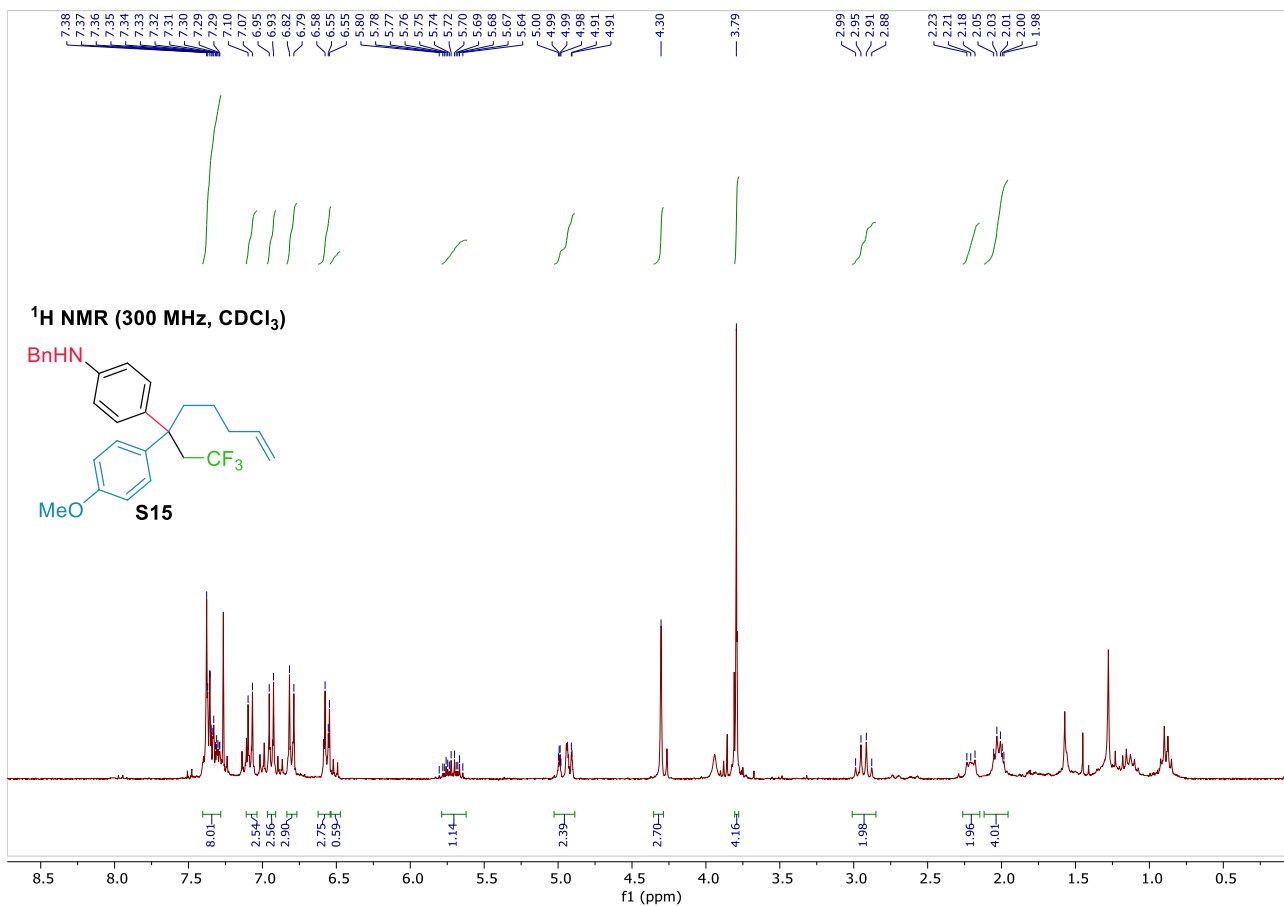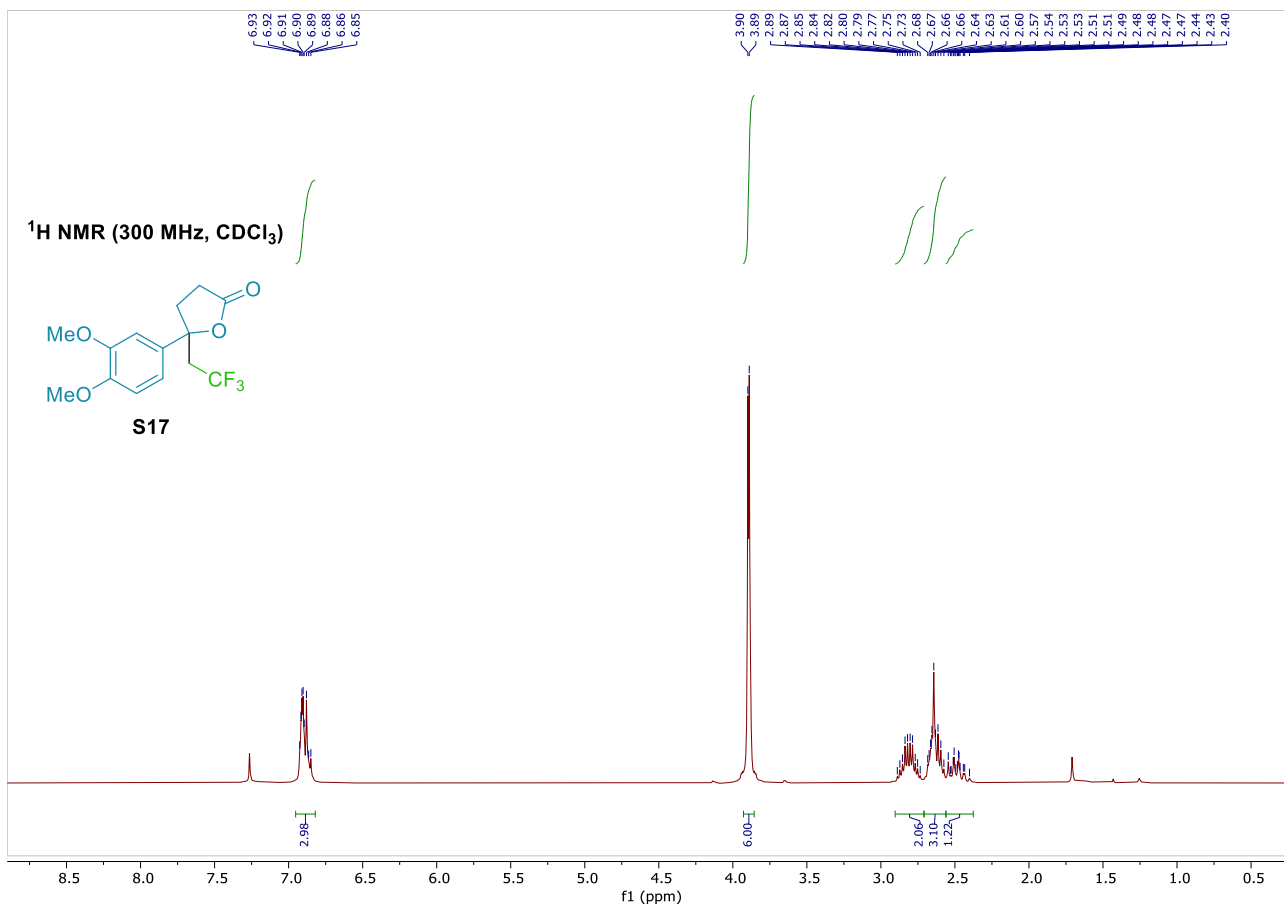

Supplement: d3sc03868h1.pdf [file d3sc03868h1.pdf]
